# Supplementary material for: Temporal transcriptomics suggest that twin-peaking genes reset the clock
Source: eLife. 2015 Nov 2;4:e10518. doi: 10.7554/eLife.10518 (PMC4718813; doi:10.7554/eLife.10518)
Supplement: Supplementary file 1. — DOI: http://dx.doi.org/10.7554/eLife.10518.011 [file elife-10518-supp1.xls]

## Sheet: Primer_list_S1
Target	forward primer 5'-	reverse primer 5'-
5430402O13Rik	TGGCTCGGCTCAGGTAAC	GTAAAGGTCGCCAGCACAC
ActB	CCCTAAGGCCAACCGTGAAA	AGCCTGGATGGCTACGTACA
Ankrd40	GGTGGATGTGAACTCGCAAA	CCTGTCCATGGTTGCGTTTA
Ano3	TTGCTCACTGCAGAGACTCAAC	GCGAAGAAAACTGTCCCTCCA
Avp	CAAGAGGGCCATCTCTGACA	TCCGAAGCAGCGTCCTTT
Bex1	CCTGGTGGTGAGCATCTCTA	GCCTTGATCTTTGGACTCCATTA
Bex2	GACTACGCCGCAAGGGATA	GCATCCTGTGGCTTTTCTTCC
Bex4	GTGCAGGGAACAGAAGTCAA	GGTTCGGAAACGCCTGTAA
Bhlhe40	CAGCTGAAGGATCTCCTACCC	TCAACGTAAGCTCCAGAACCA
Cacna1h	TCTCTGAGCCTCTCACGGATA	CGTCATCTATCTGCCCTTCCA
Calm1	ACACAGATAGCGAAGAAGAGATCC	AGTTCTGCCGCACTGATGTA
Ckmt1	GAGAAAGGCGGCAACATGAA	CAGCCTCGTTCCTGGATCA
Clock	ACGTTCACTCAGGACAGACA	ACAAGCTACAGGAGCAGTCA
Cnp	GAGGAGCTGGGGAATCACAA	TCAAGCTTCTCCTTGGGTTCA
Cnr1	ACAAGCACGCCAATAACACA	TGGTCACCTTGGCGATCTTA
Coa6	ACGACAACGCGGAGGAC	GACTGGAATCCTCCTGCTTCA
Cox6a1	CGTTCGTTGCCTACCCTCA	GGTCGGAAGTGGGTTCACA
Cpne4	AGAGTTCACCTCCACCTTCAA	ACTTGGGGTTGATGCATTCC
Cry1	AGCCAGCTGATGTATTTCCC	CCTTCCCAAAAGGCTCAGAA
Cry1 Exon 1a	TTCCAACGTGGGCATCAAC	GTCCCCGAATCACAAACAGAC
Cry1 Exon 1b	AAAGACACGGCTGGCACATA	AGACGATTGTGTGGCGGAAT
Egr1	ACAACCCTATGAGCACCTGAC	GGCTGGGATAACTCGTCTCC
Foxp1	CGGAGGCCACAAAAGATCA	GCATTGAGAGGTGTGCAGTA
Gapdh	AGACGGCCGCATCTTCTT	TTCACACCGACCTTCACCAT
Gpx3	CCAGCTACTGAGGTCTGACA	CCCAGAATGACCAAGCCAAA
Gria1	TCATGCAGCAAGGATGTGAC	CAAAGTGAAGAACCACCAGACA
Gria2	GGAAATAGAAAGGGCCCTCA	CGTTTTCCGTTCTGGTCAAA
Gria3	TCCCTGAAGCCAAGAATGCA	TCGGAAGGCTTCTGCTATGAC
Grin2b	TGCATCCGAAGCTGGTGATA	TGCAGGGACTTGTCTTTCCA
Hpca	TCTTCCGCCAAATGGACACA	TTTGGCTCCGCGGATGAA
Kcnab1	AGGGGACTGTCAAGAAAGCA	AGACCACATCCACGTATTCCA
Kcnj2	GTCCCCATGATCCTGTACCA	GGGGTTCTTTTGACCAGCAA
Kcnma1	CTTCGTGGGTCTGTCCTTCC	GGCAGACTTGTACTCAATGGCTA
Klf9	CCTACAGTGGCTGTGGGAAA	GGCCACGTGCAGGGAAA
Klhdc8b	CCTGCACGGGAACAAGATCTA	CATGTACGGGTCTCCAGATCA
Marcks	TCGTCGCCTTCCAAAGCAAA	CGCGTCCCCGTTCACTTTTA
Mbp	CCCTCACAGCGATCCAAGTA	CTCTGTGCCTTGGGAGGAA
Mog	ACACCTGCTTCTTCAGAGACC	CCGGGGTTGACCCAATAGAA
Ndufa6	AGAATGCCCATGTCACAGACC	TGTGTCCGCTGCTTCCATAC
Nfil3	TACAGCCGCCCTTTCTTTTCC	GTTGTCCGGCACAGGGTAAA
Nkiras1	GGTTGCTGTCTGTTGGGAAA	CAGCGTTTCACAGTCTTCCA
NONCO7761 (3100003L05Rik)	TCTCGACACAGTCACAGGTA	CAGAGCTAGTGCTCCAAGAAA
Npy	CGCTCTGCGACACTACATCA	GCGTTTTCTGTGCTTTCCTTCA
Npy2r	AAGGAACGCGCAAGAGTCAA	TCTCATCTGCCTCTGCACCTA
Nr1d1	GACCAGGTGACCCTGCTTAA	TCTGGTCCTTCACGTTGAACA
Nrn1	CGACAAGACGAACATCAAGACC	CCCTTCCTGGCAATCCGTAA
Nts	AGCCCTGGAGGCAGATCTA	GTCATTTTCCAAGACGGAGGAC
Per1	CCTCATGCTGGCCATTCATA	CACAGAAGCGAATAGGGGAA
Prok2	GGCTTGGCGTGTTTAAGGAC	GGGTCGCATTTCAAGTTCCTAC
Prokr2	TCCCTGTACGTCTCCACCAA	CAGGAAGGAAGCGGTCTGATA
Ptgds	GTGCAGCCCAACTTTCAACA	TACAGCTTTCTTCTCCCGGAAC
Rasd1	CGGCAATCATCCGTTTCCC	TCGCGGTTGTCTAAGCTGAA
Rbfox1	AGAAGACTGTCAACCCCTACAC	GCATAGAAGTCGGGGCTGTA
Rora	AGAACCACCGAGAAGATGGAA	GTCGTCCACATAGGGCTCTTA
Rorb	GGAGCTGTGTCAGAACGATCA	GAAGGCACGACACATTCTCAC
Rpl19	CTGGTTGGATCCCAATGAGAC	CCCATCCTTGATCAGCTTCC
Ryr2	TGGAGGACATGCATCCAACA	TCCTATGCCTGACAAGAACTCC
Sar1a	AGCACGTACCAACACTCCA	CATGCCCACCGAGATCAAAA
Scg2	TGCTTGGAGCCTTCCACATA	CTCCAAGTCGGTACGCCTTA
Sirt2	ACCATCTGCCACTACTTCATCC	CACTCGTTCCAGCGTGTCTA
Sirt4	TGAAAGAGGCGGACTCCCTA	GCGGTGAGGATGAACCTGTAA
Slc17a7	AGAGCGCCAAGCTCATGAA	ACGGGCATGGACGTAAAGAA
Smarce1	CGCGGGACAAAGGGAA	TGACATTTTGGAAGATTAAGTTCTCA
Snrpn	GAACTCCACCTCCACCTGTA	GCCCATGGGTGGTCTCATA
Stx1a	CACCAAGAAGGCCGTCAAGTA	TGCCCAGAATCACACAGCAA
Syn1	CAAGGACGGAAGGGATCACA	GATGAGCTGCTTGTCTTCATCC
Syngr3	GTGCGCTTTCAGCAGATCA	AACCACAGGAAGGACCAGAC
Tac1	ACATGGCCAGATCTCTCAC	GCTCTTTTGCCCATTAGTCC
Tef	TCGCCACCATCTTCCTCTAC	TCCCTCTCCTTTTCCAAGGAC
Tpgs2	CTGCCTGCTGAGCGTCATA	TTCTCACATCCTCAGGCATCAC
Tsn	AACACATCTCACGTCCCTGAA	GAACCGCCAATGCTCATGAA
Vamp2	TGCACCTCCTCCAAACCTTAC	CCTTGTCCACATTCACCCTCA
Ywhaz	ATGTTCTTGGCCCATGTGAC	AAACCAACAGCGACTTGGAA
