# Supplementary material for: Temporal transcriptomics suggest that twin-peaking genes reset the clock
Source: eLife. 2015 Nov 2;4:e10518. doi: 10.7554/eLife.10518 (PMC4718813; doi:10.7554/eLife.10518)
Supplement: Supplementary file 3. — DOI: http://dx.doi.org/10.7554/eLife.10518.013 [file elife-10518-supp3.xls]

## Sheet: LincInfo_S3
Name	Coordinates	FPKM	Nearest PC L	Distance PC L	Nearest PC R	Distance PC R	Correlation PC L	Correlation PC R	Fluctuating	Name.1	Coordinates.1	FPKM.1	Nearest PC L.1	Distance PC L.1	Nearest PC R.1	Distance PC R.1	Correlation PC L.1	Correlation PC R.1	JTK.padj	Peak phase	Dynamic range	WGCNA module	Expression level (counts)	GLM.padj	Human linc	lincRNA phastCons	TE phastCons	z-score cons - TE	Flanking phastCons	z-score cons - flanking	Gene name	Annotated	Belgard	Ramos	CAGE permissive	Retro pseudogene overlap	TE overlap
NONCO10004	chr9:91164922-91166715	1.9	ENSMUSG00000037410	894119	ENSMUSG00000032368	191344	-0.08	0.3	FALSE	NONCO10004	chr9:91164922-91166715	1.9	ENSMUSG00000037410	894119	ENSMUSG00000032368	191344	-0.08	0.3	0.3708	0	35.9	greenyellow	4.5	0.3451	EMPTY	0.12	0.36	0.33	0.01	12.21	EMPTY	FALSE	FALSE	FALSE	FALSE	FALSE	FALSE
NONCO10005	chr9:91252401-91261827	1.3	ENSMUSG00000037410	981598	ENSMUSG00000032368	96232	-0.41	0.23	FALSE	NONCO10005	chr9:91252401-91261827	1.3	ENSMUSG00000037410	981598	ENSMUSG00000032368	96232	-0.41	0.23	1	11	17.5	blue	26.9	0.0164	EMPTY	EMPTY	EMPTY	EMPTY	EMPTY	EMPTY	EMPTY	FALSE	FALSE	FALSE	FALSE	FALSE	FALSE
NONCO10007	chr9:91351201-91352715	2.4	ENSMUSG00000037410	1080398	ENSMUSG00000032368	5344	-0.04	0.5	FALSE	NONCO10007	chr9:91351201-91352715	2.4	ENSMUSG00000037410	1080398	ENSMUSG00000032368	5344	-0.04	0.5	1	9	10.2	brown	25.6	0.0581	EMPTY	0.06	0.01	11.12	0.06	0.95	EMPTY	FALSE	FALSE	FALSE	TRUE	FALSE	FALSE
NONCO1002	chr1:39026261-39027605	0.1	ENSMUSG00000026078	29024	ENSMUSG00000026077	166127	-0.28	0.07	FALSE	NONCO1002	chr1:39026261-39027605	0.1	ENSMUSG00000026078	29024	ENSMUSG00000026077	166127	-0.28	0.07	0.1619	20	45112.9	lightsteelblue1	1.3	NA	EMPTY	0.01	0.21	0.07	0.01	1.31	EMPTY	FALSE	FALSE	FALSE	FALSE	FALSE	FALSE
NONCO10027	chr9:96660723-96662056	0.2	ENSMUSG00000032413	29107	ENSMUSG00000040433	20715	0.09	0.53	FALSE	NONCO10027	chr9:96660723-96662056	0.2	ENSMUSG00000032413	29107	ENSMUSG00000040433	20715	0.09	0.53	0.2979	20	45405.5	lightsteelblue1	1.1	NA	EMPTY	0.06	0.07	0.91	0.2	0.32	EMPTY	FALSE	FALSE	FALSE	FALSE	FALSE	FALSE
NONCO10031	chr9:96805296-96817045	0.5	ENSMUSG00000040433	52466	ENSMUSG00000043587	6292	-0.28	-0.12	FALSE	NONCO10031	chr9:96805296-96817045	0.5	ENSMUSG00000040433	52466	ENSMUSG00000043587	6292	-0.28	-0.12	1	15	117937	brown4	3.5	0.5498	EMPTY	0.03	0.05	0.76	0.03	1.06	Gm28688	FALSE	FALSE	FALSE	TRUE	TRUE	FALSE
NONCO10037	chr9:97275744-97281852	1.2	ENSMUSG00000032449	164588	ENSMUSG00000032451	67711	EMPTY	EMPTY	FALSE	NONCO10037	chr9:97275744-97281852	1.2	ENSMUSG00000032449	164588	ENSMUSG00000032451	67711	EMPTY	EMPTY	0.254	0	57.6	turquoise	6	0.3598	EMPTY	0.08	0.15	0.5	0.18	0.41	EMPTY	FALSE	FALSE	FALSE	TRUE	FALSE	TRUE
NONCO10067	chr9:102423860-102479703	1.3	ENSMUSG00000032537	69168	ENSMUSG00000035606	26048	0.12	0.58	FALSE	NONCO10067	chr9:102423860-102479703	1.3	ENSMUSG00000032537	69168	ENSMUSG00000035606	26048	0.12	0.58	0.1539	6	13	brown	10.4	0.2387	EMPTY	0.01	0.14	0.08	0.2	0.06	EMPTY	FALSE	FALSE	FALSE	FALSE	FALSE	FALSE
NONCO10095	chr9:106794330-106795093	0.2	ENSMUSG00000040661	5137	ENSMUSG00000040325	26782	-0.33	-0.01	FALSE	NONCO10095	chr9:106794330-106795093	0.2	ENSMUSG00000040661	5137	ENSMUSG00000040325	26782	-0.33	-0.01	1	7	25.1	darkorange	2.2	0.5261	EMPTY	0.17	0.01	25.1	0.19	0.86	EMPTY	FALSE	FALSE	FALSE	FALSE	FALSE	FALSE
NONCO10127	chr9:109805505-109806722	2.1	ENSMUSG00000059547	59417	ENSMUSG00000050074	9906	EMPTY	EMPTY	FALSE	NONCO10127	chr9:109805505-109806722	2.1	ENSMUSG00000059547	59417	ENSMUSG00000050074	9906	EMPTY	EMPTY	1	7	5.4	violet	11.5	0.5391	EMPTY	0.37	0.01	49.94	0.06	5.73	EMPTY	FALSE	FALSE	FALSE	FALSE	FALSE	FALSE
NONCO1015	chr1:42706909-42715460	9.8	ENSMUSG00000045515	3734	ENSMUSG00000060679	135774	0.33	0.27	FALSE	NONCO1015	chr1:42706909-42715460	9.8	ENSMUSG00000045515	3734	ENSMUSG00000060679	135774	0.33	0.27	0.9921	0	2.4	blue	79.2	0.5326	EMPTY	0.03	0.03	1.35	0.09	0.36	Pantr2	FALSE	TRUE	TRUE	TRUE	FALSE	FALSE
NONCO10151	chr9:113719261-113738910	7.7	ENSMUSG00000032504	11003	ENSMUSG00000033392	73677	0.38	0.04	FALSE	NONCO10151	chr9:113719261-113738910	7.7	ENSMUSG00000032504	11003	ENSMUSG00000033392	73677	0.38	0.04	0.0634	6	16.7	brown	21.8	0.0466	EMPTY	0.17	0.04	4.89	0.03	5.58	EMPTY	FALSE	FALSE	FALSE	TRUE	FALSE	FALSE
NONCO1016	chr1:42744063-42744783	2.2	ENSMUSG00000045515	40888	ENSMUSG00000060679	106451	0	-0.37	FALSE	NONCO1016	chr1:42744063-42744783	2.2	ENSMUSG00000045515	40888	ENSMUSG00000060679	106451	0	-0.37	1	15	2.4	brown	28.5	0.94	EMPTY	0.08	0.01	5.97	0.19	0.42	Gm20646	FALSE	FALSE	FALSE	FALSE	FALSE	FALSE
NONCO10205	chr9:121871560-121876354	0.5	ENSMUSG00000038412	13561	ENSMUSG00000044534	22111	EMPTY	EMPTY	FALSE	NONCO10205	chr9:121871560-121876354	0.5	ENSMUSG00000038412	13561	ENSMUSG00000044534	22111	EMPTY	EMPTY	1	7	3.1	darkorange	12.3	0.7734	EMPTY	0.17	0.1	1.71	0.24	0.71	EMPTY	FALSE	FALSE	FALSE	FALSE	FALSE	FALSE
NONCO10210	chr9:122572497-122683641	3	ENSMUSG00000032540	190974	ENSMUSG00000094985	63706	EMPTY	EMPTY	FALSE	NONCO10210	chr9:122572497-122683641	3	ENSMUSG00000032540	190974	ENSMUSG00000094985	63706	EMPTY	EMPTY	0.2287	14	14.5	blue	28.8	0.0444	EMPTY	0.15	0.05	3.02	0.01	11.66	9530059O14Rik	TRUE	TRUE	TRUE	TRUE	FALSE	FALSE
NONCO10215	chr9:122902726-122914086	8.9	ENSMUSG00000063488	6603	ENSMUSG00000057895	8987	EMPTY	EMPTY	FALSE	NONCO10215	chr9:122902726-122914086	8.9	ENSMUSG00000063488	6603	ENSMUSG00000057895	8987	EMPTY	EMPTY	0.2287	22	2.3	turquoise	230.3	0.4989	EMPTY	0.42	0.06	6.75	0.23	1.77	A530083I20Rik	FALSE	FALSE	FALSE	TRUE	FALSE	FALSE
NONCO10225	chr9:124152650-124155184	0.7	ENSMUSG00000079227	4952	ENSMUSG00000074829	136621	EMPTY	EMPTY	TRUE	NONCO10225	chr9:124152650-124155184	0.7	ENSMUSG00000079227	4952	ENSMUSG00000074829	136621	EMPTY	EMPTY	0.0069	4	471350	brown	10.3	0	EMPTY	EMPTY	EMPTY	EMPTY	EMPTY	EMPTY	EMPTY	FALSE	FALSE	FALSE	FALSE	FALSE	FALSE
NONCO10226	chr9:124268503-124269941	1.1	ENSMUSG00000079227	120805	ENSMUSG00000074829	21864	EMPTY	EMPTY	FALSE	NONCO10226	chr9:124268503-124269941	1.1	ENSMUSG00000079227	120805	ENSMUSG00000074829	21864	EMPTY	EMPTY	1	9	3.9	darkred	6.6	0.636	EMPTY	EMPTY	EMPTY	EMPTY	EMPTY	EMPTY	EMPTY	FALSE	FALSE	FALSE	FALSE	FALSE	FALSE
NONCO10227	chr9:124279902-124282216	3.1	ENSMUSG00000079227	132204	ENSMUSG00000074829	9589	EMPTY	EMPTY	FALSE	NONCO10227	chr9:124279902-124282216	3.1	ENSMUSG00000079227	132204	ENSMUSG00000074829	9589	EMPTY	EMPTY	0.2287	6	5.1	midnightblue	39.5	0.1192	EMPTY	EMPTY	EMPTY	EMPTY	EMPTY	EMPTY	EMPTY	FALSE	FALSE	FALSE	FALSE	FALSE	FALSE
NONCO1024	chr1:43884115-43889737	33.4	ENSMUSG00000057363	56316	ENSMUSG00000041763	43911	0.04	0.35	TRUE	NONCO1024	chr1:43884115-43889737	33.4	ENSMUSG00000057363	56316	ENSMUSG00000041763	43911	0.04	0.35	0.0377	13	6.5	darkgreen	13	0.0007	EMPTY	0.74	0.03	23.66	0.14	5.3	Gm19587	FALSE	FALSE	FALSE	TRUE	TRUE	FALSE
NONCO1025	chr1:43899028-43901952	2.6	ENSMUSG00000057363	71229	ENSMUSG00000041763	31696	0.16	0.18	FALSE	NONCO1025	chr1:43899028-43901952	2.6	ENSMUSG00000057363	71229	ENSMUSG00000041763	31696	0.16	0.18	0.3482	11	10.9	brown	2.8	0.2939	EMPTY	0.36	0	74.21	0.19	1.85	EMPTY	FALSE	FALSE	FALSE	FALSE	FALSE	FALSE
NONCO10252	chr9:7214953-7220882	10.6	ENSMUSG00000032002	7923	ENSMUSG00000050578	51633	EMPTY	EMPTY	TRUE	NONCO10252	chr9:7214953-7220882	10.6	ENSMUSG00000032002	7923	ENSMUSG00000050578	51633	EMPTY	EMPTY	0.0122	5	6.7	brown	206.6	0	EMPTY	0.06	0.34	0.17	0.17	0.35	EMPTY	FALSE	FALSE	FALSE	FALSE	FALSE	FALSE
NONCO10265	chr9:13297061-13298560	0.9	ENSMUSG00000079084	7653	ENSMUSG00000031802	132802	-0.29	-0.01	FALSE	NONCO10265	chr9:13297061-13298560	0.9	ENSMUSG00000079084	7653	ENSMUSG00000031802	132802	-0.29	-0.01	0.4726	17	7.6	darkgreen	12.8	0.3117	EMPTY	0.62	0.14	4.4	0.26	2.38	EMPTY	FALSE	FALSE	FALSE	FALSE	FALSE	FALSE
NONCO10267	chr9:13560589-13614752	1.7	ENSMUSG00000090592	113837	ENSMUSG00000031925	5239	0.77	-0.16	FALSE	NONCO10267	chr9:13560589-13614752	1.7	ENSMUSG00000090592	113837	ENSMUSG00000031925	5239	0.77	-0.16	1	15	896692	blue	16.8	0.0056	EMPTY	0.16	0.05	3.28	0.06	2.58	EMPTY	FALSE	FALSE	FALSE	FALSE	FALSE	FALSE
NONCO10271	chr9:13868802-13869245	3.2	ENSMUSG00000037808	22262	ENSMUSG00000032009	407057	-0.45	-0.12	TRUE	NONCO10271	chr9:13868802-13869245	3.2	ENSMUSG00000037808	22262	ENSMUSG00000032009	407057	-0.45	-0.12	0.0256	14	16.6	darkgreen	8.2	0.0003	EMPTY	0.98	0.14	6.88	0.11	9.22	EMPTY	FALSE	FALSE	FALSE	FALSE	FALSE	FALSE
NONCO10274	chr9:14405579-14444653	0.2	ENSMUSG00000037419	24338	ENSMUSG00000053914	17896	0.25	-0.07	FALSE	NONCO10274	chr9:14405579-14444653	0.2	ENSMUSG00000037419	24338	ENSMUSG00000053914	17896	0.25	-0.07	1	13	24012.9	lightsteelblue1	0.9	NA	EMPTY	EMPTY	EMPTY	EMPTY	EMPTY	EMPTY	EMPTY	FALSE	FALSE	FALSE	FALSE	FALSE	FALSE
NONCO10281	chr9:16416723-16508592	22.4	ENSMUSG00000074505	38493	ENSMUSG00000090602	521454	0.45	-0.36	FALSE	NONCO10281	chr9:16416723-16508592	22.4	ENSMUSG00000074505	38493	ENSMUSG00000090602	521454	0.45	-0.36	0.1619	16	2.6	violet	21.2	0.1924	EMPTY	0.03	0.01	5.65	0.47	0.07	EMPTY	FALSE	FALSE	FALSE	FALSE	FALSE	FALSE
NONCO10286	chr9:17733161-17733939	0.2	ENSMUSG00000090602	702263	ENSMUSG00000001774	558329	0.1	0.13	FALSE	NONCO10286	chr9:17733161-17733939	0.2	ENSMUSG00000090602	702263	ENSMUSG00000001774	558329	0.1	0.13	1	9	2.2	lightsteelblue1	3.9	0.9671	ENSG00000273295	1	0.08	12.34	0.19	5.13	EMPTY	FALSE	FALSE	FALSE	FALSE	FALSE	FALSE
NONCO10292	chr9:20601234-20605404	1.5	ENSMUSG00000058192	6041	ENSMUSG00000066892	12715	-0.18	-0.18	FALSE	NONCO10292	chr9:20601234-20605404	1.5	ENSMUSG00000058192	6041	ENSMUSG00000066892	12715	-0.18	-0.18	0.9921	2	2.6	brown	28.8	0.7716	EMPTY	0.34	0.1	3.54	0.18	1.88	EMPTY	FALSE	FALSE	FALSE	FALSE	FALSE	FALSE
NONCO10293	chr9:20606141-20612598	1.4	ENSMUSG00000058192	10948	ENSMUSG00000066892	5521	0.15	0.11	FALSE	NONCO10293	chr9:20606141-20612598	1.4	ENSMUSG00000058192	10948	ENSMUSG00000066892	5521	0.15	0.11	1	9	2.7	lightyellow	44.6	0.7355	EMPTY	0.05	0.29	0.18	0.21	0.26	Fbxl12os,Gm26521	FALSE	FALSE	TRUE	TRUE	FALSE	FALSE
NONCO10298	chr9:20995594-20997538	0.3	ENSMUSG00000043895	18802	ENSMUSG00000003299	5200	0.21	0	FALSE	NONCO10298	chr9:20995594-20997538	0.3	ENSMUSG00000043895	18802	ENSMUSG00000003299	5200	0.21	0	1	15	110266	brown4	3.1	NA	EMPTY	0.19	0.18	1.06	0.11	1.74	EMPTY	FALSE	FALSE	FALSE	FALSE	FALSE	FALSE
NONCO10306	chr9:21318074-21322637	1.5	ENSMUSG00000003309	5742	ENSMUSG00000057193	15192	0.55	0.05	FALSE	NONCO10306	chr9:21318074-21322637	1.5	ENSMUSG00000003309	5742	ENSMUSG00000057193	15192	0.55	0.05	1	15	1.9	orange	5	0.9948	EMPTY	0.1	0.2	0.52	0.11	0.95	EMPTY	FALSE	FALSE	FALSE	TRUE	FALSE	FALSE
NONCO1033	chr1:44463833-44464295	45.3	ENSMUSG00000046828	244873	ENSMUSG00000056870	87217	EMPTY	EMPTY	TRUE	NONCO1033	chr1:44463833-44464295	45.3	ENSMUSG00000046828	244873	ENSMUSG00000056870	87217	EMPTY	EMPTY	0.0069	13	2.7	darkgreen	139.5	0	EMPTY	0.19	0	547.27	0.04	5.11	Txn-ps1	FALSE	FALSE	FALSE	TRUE	TRUE	FALSE
NONCO10334	chr9:23204349-23213503	1.1	ENSMUSG00000035919	316070	ENSMUSG00000031963	9574	0.51	0.14	FALSE	NONCO10334	chr9:23204349-23213503	1.1	ENSMUSG00000035919	316070	ENSMUSG00000031963	9574	0.51	0.14	1	11	174098	turquoise	10.2	0.0365	EMPTY	0.02	0	8.3	0.21	0.08	EMPTY	FALSE	FALSE	FALSE	FALSE	FALSE	FALSE
NONCO10344	chr9:26503865-26549692	0.6	ENSMUSG00000036611	899756	ENSMUSG00000045994	184037	0.13	0.23	FALSE	NONCO10344	chr9:26503865-26549692	0.6	ENSMUSG00000036611	899756	ENSMUSG00000045994	184037	0.13	0.23	0.2696	22	53657	paleturquoise	2.4	0.2804	EMPTY	0.26	0.01	19.94	0.03	10.05	EMPTY	FALSE	TRUE	FALSE	TRUE	FALSE	FALSE
NONCO1035	chr1:45520092-45520752	0.4	ENSMUSG00000026042	16811	ENSMUSG00000025995	274415	0.47	-0.48	FALSE	NONCO1035	chr1:45520092-45520752	0.4	ENSMUSG00000026042	16811	ENSMUSG00000025995	274415	0.47	-0.48	0.4726	12	49527	darkgreen	1.4	NA	EMPTY	0.86	0.14	6.03	0.19	4.42	EMPTY	FALSE	FALSE	FALSE	FALSE	FALSE	FALSE
NONCO10360	chr9:31243681-31244122	0.9	ENSMUSG00000031996	31867	ENSMUSG00000042496	36417	-0.11	-0.04	FALSE	NONCO10360	chr9:31243681-31244122	0.9	ENSMUSG00000031996	31867	ENSMUSG00000042496	36417	-0.11	-0.04	0.4726	0	112853	darkred	3.5	0.1885	EMPTY	0.03	0.14	0.24	0.23	0.15	EMPTY	FALSE	FALSE	FALSE	TRUE	FALSE	FALSE
NONCO10383	chr9:35305218-35305631	48	ENSMUSG00000032044	27488	ENSMUSG00000038119	115498	0.03	0.5	FALSE	NONCO10383	chr9:35305218-35305631	48	ENSMUSG00000032044	27488	ENSMUSG00000038119	115498	0.03	0.5	0.5461	18	236	orange	95.1	0.0009	EMPTY	EMPTY	EMPTY	EMPTY	EMPTY	EMPTY	EMPTY	FALSE	FALSE	FALSE	TRUE	FALSE	FALSE
NONCO1039	chr1:47657874-47659688	8.8	ENSMUSG00000025986	765023	ENSMUSG00000026109	3240960	0.06	0.87	TRUE	NONCO1039	chr1:47657874-47659688	8.8	ENSMUSG00000025986	765023	ENSMUSG00000026109	3240960	0.06	0.87	0.0057	16	17.7	darkgreen	18.8	0	EMPTY	1	0.04	22.74	0.19	5.14	EMPTY	FALSE	FALSE	FALSE	FALSE	FALSE	FALSE
NONCO10396	chr9:39893599-39898824	2.6	ENSMUSG00000094449	19379	ENSMUSG00000095390	10982	EMPTY	EMPTY	FALSE	NONCO10396	chr9:39893599-39898824	2.6	ENSMUSG00000094449	19379	ENSMUSG00000095390	10982	EMPTY	EMPTY	0.4325	5	5.7	salmon4	7.7	0.1013	EMPTY	EMPTY	EMPTY	EMPTY	EMPTY	EMPTY	EMPTY	FALSE	FALSE	FALSE	FALSE	FALSE	FALSE
NONCO10408	chr9:41432380-41447011	0.7	ENSMUSG00000032020	270684	ENSMUSG00000049313	517710	-0.06	-0.07	FALSE	NONCO10408	chr9:41432380-41447011	0.7	ENSMUSG00000032020	270684	ENSMUSG00000049313	517710	-0.06	-0.07	1	17	3.6	blue	2.2	0.9961	EMPTY	0.56	0.14	3.93	0.37	1.52	EMPTY	FALSE	FALSE	FALSE	FALSE	FALSE	FALSE
NONCO10409	chr9:41571742-41579518	0.3	ENSMUSG00000032020	410046	ENSMUSG00000049313	385203	0.15	0	FALSE	NONCO10409	chr9:41571742-41579518	0.3	ENSMUSG00000032020	410046	ENSMUSG00000049313	385203	0.15	0	0.0634	20	112808	blue	3.6	0.0098	ENSG00000267522	0.47	0.14	3.32	0.38	1.23	EMPTY	FALSE	FALSE	FALSE	TRUE	FALSE	FALSE
NONCO1041	chr1:49555447-49555980	86.9	ENSMUSG00000025986	2662596	ENSMUSG00000026109	1344668	-0.51	-0.28	FALSE	NONCO1041	chr1:49555447-49555980	86.9	ENSMUSG00000025986	2662596	ENSMUSG00000026109	1344668	-0.51	-0.28	0.0954	5	2.3	midnightblue	236.6	0.0565	ENSG00000227925	0.84	0.14	5.92	0.45	1.88	EMPTY	FALSE	FALSE	FALSE	FALSE	FALSE	FALSE
NONCO10410	chr9:41582002-41583146	2.3	ENSMUSG00000032020	420306	ENSMUSG00000049313	381575	-0.04	0.08	FALSE	NONCO10410	chr9:41582002-41583146	2.3	ENSMUSG00000032020	420306	ENSMUSG00000049313	381575	-0.04	0.08	1	7	2.8	greenyellow	25.7	0.9795	EMPTY	0.33	0.14	2.35	0.51	0.65	Gm28119	FALSE	FALSE	FALSE	TRUE	FALSE	FALSE
NONCO10412	chr9:41694401-41737204	1	ENSMUSG00000032020	532705	ENSMUSG00000049313	227517	0.17	0.22	FALSE	NONCO10412	chr9:41694401-41737204	1	ENSMUSG00000032020	532705	ENSMUSG00000049313	227517	0.17	0.22	0.3159	4	67482.8	greenyellow	3	0.2575	EMPTY	0.6	0.14	4.23	0.1	5.72	EMPTY	FALSE	TRUE	FALSE	TRUE	FALSE	TRUE
NONCO10413	chr9:41886199-41890833	3.9	ENSMUSG00000032020	724503	ENSMUSG00000049313	73888	-0.3	-0.22	FALSE	NONCO10413	chr9:41886199-41890833	3.9	ENSMUSG00000032020	724503	ENSMUSG00000049313	73888	-0.3	-0.22	1	6	4.5	lightyellow	12.5	0.5924	ENSG00000268568	0.46	0.13	3.46	0.05	9.07	EMPTY	FALSE	FALSE	FALSE	TRUE	FALSE	FALSE
NONCO10414	chr9:42183541-42210664	1.1	ENSMUSG00000049313	59245	ENSMUSG00000032018	43514	-0.07	0.3	FALSE	NONCO10414	chr9:42183541-42210664	1.1	ENSMUSG00000049313	59245	ENSMUSG00000032018	43514	-0.07	0.3	1	11	2.1	lightyellow	8.4	0.9971	ENSG00000268568	0.36	0.11	3.34	0.29	1.25	EMPTY	FALSE	FALSE	FALSE	TRUE	FALSE	FALSE
NONCO10420	chr9:43505898-43521031	1	ENSMUSG00000032013	169774	ENSMUSG00000032012	223546	0.01	-0.41	FALSE	NONCO10420	chr9:43505898-43521031	1	ENSMUSG00000032013	169774	ENSMUSG00000032012	223546	0.01	-0.41	0.254	22	49.4	turquoise	11.3	0.4364	EMPTY	0.27	0.14	1.88	0.01	23.14	EMPTY	FALSE	TRUE	FALSE	TRUE	FALSE	FALSE
NONCO10424	chr9:43932739-43944942	0.2	ENSMUSG00000096322	100224	ENSMUSG00000032011	98443	EMPTY	EMPTY	FALSE	NONCO10424	chr9:43932739-43944942	0.2	ENSMUSG00000096322	100224	ENSMUSG00000032011	98443	EMPTY	EMPTY	1	15	23811.4	turquoise	0.8	NA	EMPTY	0.02	0.14	0.17	0.13	0.19	EMPTY	FALSE	FALSE	FALSE	FALSE	FALSE	FALSE
NONCO10442	chr9:44888850-44892959	6.5	ENSMUSG00000002028	7555	ENSMUSG00000038717	20292	EMPTY	EMPTY	FALSE	NONCO10442	chr9:44888850-44892959	6.5	ENSMUSG00000002028	7555	ENSMUSG00000038717	20292	EMPTY	EMPTY	0.5013	10	15.4	midnightblue	11.8	0.0019	ENSG00000259108	0.3	0.13	2.26	0.1	3	EMPTY	FALSE	FALSE	FALSE	FALSE	FALSE	FALSE
NONCO10466	chr9:46920529-46927348	1.2	ENSMUSG00000056617	600544	ENSMUSG00000094893	71584	EMPTY	EMPTY	FALSE	NONCO10466	chr9:46920529-46927348	1.2	ENSMUSG00000056617	600544	ENSMUSG00000094893	71584	EMPTY	EMPTY	0.9921	16	24661.3	orange	0.9	NA	EMPTY	0.37	0.42	0.87	0.23	1.58	2900052N01Rik	FALSE	FALSE	FALSE	TRUE	FALSE	FALSE
NONCO10467	chr9:46960247-46979139	3	ENSMUSG00000056617	640262	ENSMUSG00000094893	19793	EMPTY	EMPTY	FALSE	NONCO10467	chr9:46960247-46979139	3	ENSMUSG00000056617	640262	ENSMUSG00000094893	19793	EMPTY	EMPTY	1	13	5.9	blue	14.4	0.7844	EMPTY	0.1	0.04	2.95	0.24	0.44	EMPTY	FALSE	FALSE	FALSE	FALSE	FALSE	FALSE
NONCO10469	chr9:47260693-47368814	4.4	ENSMUSG00000094893	257356	ENSMUSG00000032076	161360	EMPTY	EMPTY	FALSE	NONCO10469	chr9:47260693-47368814	4.4	ENSMUSG00000094893	257356	ENSMUSG00000032076	161360	EMPTY	EMPTY	0.3708	1	11.7	turquoise	15.8	0.2156	EMPTY	0.01	0	57.07	0.19	0.05	EMPTY	FALSE	FALSE	FALSE	TRUE	FALSE	FALSE
NONCO10475	chr9:48193830-48194380	0.3	ENSMUSG00000032076	336194	ENSMUSG00000032028	123627	-0.05	-0.31	FALSE	NONCO10475	chr9:48193830-48194380	0.3	ENSMUSG00000032076	336194	ENSMUSG00000032028	123627	-0.05	-0.31	1	13	4.2	brown	2.1	0.9769	ENSG00000268401	0.34	0.05	6.99	0.09	3.75	EMPTY	FALSE	FALSE	FALSE	TRUE	FALSE	FALSE
NONCO10477	chr9:48266923-48271719	4.3	ENSMUSG00000032076	409287	ENSMUSG00000032028	46288	0.77	0	TRUE	NONCO10477	chr9:48266923-48271719	4.3	ENSMUSG00000032076	409287	ENSMUSG00000032028	46288	0.77	0	0.0102	2	12.6	darkmagenta	56.3	0.0003	EMPTY	0	0.14	0.02	0.02	0.09	EMPTY	FALSE	FALSE	FALSE	FALSE	FALSE	FALSE
NONCO10480	chr9:48459453-48461233	2.6	ENSMUSG00000063543	8668	ENSMUSG00000032026	7282	0.17	-0.38	FALSE	NONCO10480	chr9:48459453-48461233	2.6	ENSMUSG00000063543	8668	ENSMUSG00000032026	7282	0.17	-0.38	1	13	14.2	darkorange	22.3	0.0117	EMPTY	0.11	0	198.56	0.08	1.37	EMPTY	FALSE	FALSE	TRUE	FALSE	FALSE	FALSE
NONCO10497	chr9:52104188-52106868	1.3	ENSMUSG00000032050	15452	ENSMUSG00000035164	5118	0.24	0.5	FALSE	NONCO10497	chr9:52104188-52106868	1.3	ENSMUSG00000032050	15452	ENSMUSG00000035164	5118	0.24	0.5	0.2287	4	6	greenyellow	6.8	0.6119	EMPTY	0.06	0.14	0.44	0.02	3.93	EMPTY	FALSE	FALSE	FALSE	TRUE	FALSE	FALSE
NONCO105	chr1:34416678-34424328	0.5	ENSMUSG00000026131	108018	ENSMUSG00000042111	12343	0.22	-0.26	FALSE	NONCO105	chr1:34416678-34424328	0.5	ENSMUSG00000026131	108018	ENSMUSG00000042111	12343	0.22	-0.26	1	17	30182.3	blue	1.2	NA	EMPTY	EMPTY	EMPTY	EMPTY	EMPTY	EMPTY	Gm3052	FALSE	FALSE	FALSE	FALSE	FALSE	TRUE
NONCO10502	chr9:52568306-52574538	0.3	ENSMUSG00000035164	400196	ENSMUSG00000078307	98507	0.35	0.59	FALSE	NONCO10502	chr9:52568306-52574538	0.3	ENSMUSG00000035164	400196	ENSMUSG00000078307	98507	0.35	0.59	0.254	20	86575.7	turquoise	2.3	0.2024	EMPTY	0.26	0.04	6.14	0.07	3.55	EMPTY	FALSE	FALSE	FALSE	TRUE	FALSE	FALSE
NONCO10513	chr9:54690417-54691706	4.2	ENSMUSG00000032281	28548	ENSMUSG00000032285	7168	0.08	-0.06	FALSE	NONCO10513	chr9:54690417-54691706	4.2	ENSMUSG00000032281	28548	ENSMUSG00000032285	7168	0.08	-0.06	0.0661	12	3.1	lightcyan	42.7	0.0042	EMPTY	0.53	0.2	2.7	0.21	2.51	EMPTY	FALSE	FALSE	FALSE	FALSE	TRUE	FALSE
NONCO10515	chr9:54823351-54829770	58	ENSMUSG00000032291	50242	ENSMUSG00000032293	33986	0.33	-0.62	TRUE	NONCO10515	chr9:54823351-54829770	58	ENSMUSG00000032291	50242	ENSMUSG00000032293	33986	0.33	-0.62	0.0047	14	3.3	darkgreen	116.1	0.0101	EMPTY	0.97	0.14	6.83	0.19	5	EMPTY	FALSE	FALSE	FALSE	TRUE	TRUE	FALSE
NONCO10527	chr9:56074654-56075062	0.7	ENSMUSG00000032320	12773	ENSMUSG00000032322	14901	0.53	0	FALSE	NONCO10527	chr9:56074654-56075062	0.7	ENSMUSG00000032320	12773	ENSMUSG00000032322	14901	0.53	0	1	9	4.6	brown	15	0.4565	EMPTY	0.06	0.12	0.54	0.06	1.05	EMPTY	FALSE	FALSE	FALSE	TRUE	FALSE	FALSE
NONCO10530	chr9:56507118-56508193	2.4	ENSMUSG00000032329	10235	ENSMUSG00000049556	110283	-0.11	-0.11	FALSE	NONCO10530	chr9:56507118-56508193	2.4	ENSMUSG00000032329	10235	ENSMUSG00000049556	110283	-0.11	-0.11	1	11	3.4	greenyellow	10.8	0.8296	EMPTY	0.28	0.03	10.81	0.11	2.43	EMPTY	FALSE	FALSE	FALSE	TRUE	FALSE	FALSE
NONCO10532	chr9:56742441-56758303	1.1	ENSMUSG00000049556	57189	ENSMUSG00000045620	90357	EMPTY	EMPTY	FALSE	NONCO10532	chr9:56742441-56758303	1.1	ENSMUSG00000049556	57189	ENSMUSG00000045620	90357	EMPTY	EMPTY	1	7	13.4	brown	3.4	0.6494	EMPTY	0	0.04	0	0.05	0	EMPTY	FALSE	FALSE	FALSE	FALSE	FALSE	TRUE
NONCO10543	chr9:57332129-57334392	0.7	ENSMUSG00000032300	69531	ENSMUSG00000063849	78277	-0.5	0.51	FALSE	NONCO10543	chr9:57332129-57334392	0.7	ENSMUSG00000032300	69531	ENSMUSG00000063849	78277	-0.5	0.51	0.0548	0	2.2	turquoise	86.9	0.1396	EMPTY	0.99	0.08	12.83	0.19	5.08	Gm5121	FALSE	FALSE	FALSE	FALSE	TRUE	FALSE
NONCO10544	chr9:57357245-57399375	0.7	ENSMUSG00000032300	94647	ENSMUSG00000063849	13294	-0.35	-0.32	FALSE	NONCO10544	chr9:57357245-57399375	0.7	ENSMUSG00000032300	94647	ENSMUSG00000063849	13294	-0.35	-0.32	1	13	41.5	brown	5.8	NA	EMPTY	0.15	0.25	0.6	0.08	1.82	EMPTY	FALSE	FALSE	FALSE	FALSE	FALSE	FALSE
NONCO10545	chr9:57388262-57390853	0.2	ENSMUSG00000032300	125664	ENSMUSG00000063849	21816	-0.47	-0.22	FALSE	NONCO10545	chr9:57388262-57390853	0.2	ENSMUSG00000032300	125664	ENSMUSG00000063849	21816	-0.47	-0.22	1	9	47574.7	brown	1.7	NA	EMPTY	EMPTY	EMPTY	EMPTY	EMPTY	EMPTY	EMPTY	FALSE	FALSE	FALSE	FALSE	FALSE	FALSE
NONCO10597	chr9:63080268-63109329	0.7	ENSMUSG00000032405	99390	ENSMUSG00000022245	28842	-0.23	-0.19	FALSE	NONCO10597	chr9:63080268-63109329	0.7	ENSMUSG00000032405	99390	ENSMUSG00000022245	28842	-0.23	-0.19	1	7	15.9	lightyellow	4	0.8125	EMPTY	0.52	1	0.52	0.5	1.03	EMPTY	FALSE	TRUE	FALSE	TRUE	FALSE	FALSE
NONCO10599	chr9:63763454-63780062	1	ENSMUSG00000032402	5461	ENSMUSG00000036867	173015	0.62	-0.27	FALSE	NONCO10599	chr9:63763454-63780062	1	ENSMUSG00000032402	5461	ENSMUSG00000036867	173015	0.62	-0.27	0.5461	11	163224	turquoise	7.3	0.0069	EMPTY	0.01	0.01	0.86	0.04	0.33	EMPTY	FALSE	FALSE	FALSE	FALSE	FALSE	FALSE
NONCO1060	chr1:55887212-55897541	0.8	ENSMUSG00000038349	132928	ENSMUSG00000045336	738504	EMPTY	EMPTY	FALSE	NONCO1060	chr1:55887212-55897541	0.8	ENSMUSG00000038349	132928	ENSMUSG00000045336	738504	EMPTY	EMPTY	1	15	78726.1	darkred	5.5	NA	EMPTY	0	0.85	0	0.75	0	EMPTY	FALSE	TRUE	FALSE	FALSE	FALSE	FALSE
NONCO10600	chr9:63898111-63899849	19.9	ENSMUSG00000032402	140118	ENSMUSG00000036867	53228	-0.45	-0.32	FALSE	NONCO10600	chr9:63898111-63899849	19.9	ENSMUSG00000032402	140118	ENSMUSG00000036867	53228	-0.45	-0.32	0.0954	12	2.4	lightcyan	48.6	0.3112	EMPTY	0.54	0	108.51	0.38	1.42	EMPTY	FALSE	FALSE	FALSE	TRUE	TRUE	FALSE
NONCO10603	chr9:64088281-64100167	0.7	ENSMUSG00000036867	66223	ENSMUSG00000032401	16981	EMPTY	EMPTY	FALSE	NONCO10603	chr9:64088281-64100167	0.7	ENSMUSG00000036867	66223	ENSMUSG00000032401	16981	EMPTY	EMPTY	1	5	74092	lightyellow	3.6	0.7856	EMPTY	0.04	0.01	3.16	0.09	0.47	EMPTY	FALSE	FALSE	FALSE	FALSE	FALSE	FALSE
NONCO10639	chr9:67597489-67598817	0.5	ENSMUSG00000052698	37787	ENSMUSG00000055125	159896	-0.32	-0.28	FALSE	NONCO10639	chr9:67597489-67598817	0.5	ENSMUSG00000052698	37787	ENSMUSG00000055125	159896	-0.32	-0.28	1	9	24.2	blue	6.1	NA	EMPTY	0.95	0	2289.72	0.1	9.48	EMPTY	FALSE	FALSE	FALSE	FALSE	FALSE	FALSE
NONCO10641	chr9:68266323-68268729	0.7	ENSMUSG00000035284	270690	ENSMUSG00000032238	385058	0.13	0.16	FALSE	NONCO10641	chr9:68266323-68268729	0.7	ENSMUSG00000035284	270690	ENSMUSG00000032238	385058	0.13	0.16	1	2	34832.4	turquoise	1.2	NA	EMPTY	0.82	0.14	5.75	0.09	9.46	EMPTY	FALSE	FALSE	FALSE	FALSE	FALSE	FALSE
NONCO10653	chr9:69667366-69673189	0.9	ENSMUSG00000032231	175572	ENSMUSG00000059246	84522	0.57	-0.42	FALSE	NONCO10653	chr9:69667366-69673189	0.9	ENSMUSG00000032231	175572	ENSMUSG00000059246	84522	0.57	-0.42	0.8278	0	119348	turquoise	4.2	0.5465	EMPTY	0.13	0.14	0.92	0.28	0.47	EMPTY	FALSE	FALSE	FALSE	FALSE	FALSE	FALSE
NONCO10655	chr9:69829714-69830863	1.5	ENSMUSG00000059246	68775	ENSMUSG00000011958	158604	0.52	0.26	FALSE	NONCO10655	chr9:69829714-69830863	1.5	ENSMUSG00000059246	68775	ENSMUSG00000011958	158604	0.52	0.26	0.254	6	21.5	brown	1.6	NA	EMPTY	0.02	0.14	0.12	0.55	0.03	B230323A14Rik	FALSE	FALSE	FALSE	TRUE	FALSE	FALSE
NONCO10663	chr9:71779441-71802726	1.1	ENSMUSG00000032232	7840	ENSMUSG00000032228	39963	0.53	0.21	FALSE	NONCO10663	chr9:71779441-71802726	1.1	ENSMUSG00000032232	7840	ENSMUSG00000032228	39963	0.53	0.21	1	7	26.2	greenyellow	9	0.898	ENSG00000267081	0	0.22	0	0.33	0	EMPTY	FALSE	FALSE	FALSE	FALSE	FALSE	FALSE
NONCO10670	chr9:72210527-72212824	1.6	ENSMUSG00000032228	98657	ENSMUSG00000038535	62037	-0.31	0.67	FALSE	NONCO10670	chr9:72210527-72212824	1.6	ENSMUSG00000032228	98657	ENSMUSG00000038535	62037	-0.31	0.67	1	13	169	brown	11.8	0.103	EMPTY	0.59	0.02	33.51	0.53	1.12	EMPTY	FALSE	FALSE	FALSE	FALSE	FALSE	FALSE
NONCO10676	chr9:72430643-72431509	1.1	ENSMUSG00000038535	66867	ENSMUSG00000032221	6503	0.22	-0.39	TRUE	NONCO10676	chr9:72430643-72431509	1.1	ENSMUSG00000038535	66867	ENSMUSG00000032221	6503	0.22	-0.39	0.0084	6	10.3	midnightblue	9	0.002	EMPTY	1	0.18	5.6	0.03	31.68	EMPTY	FALSE	FALSE	FALSE	FALSE	TRUE	FALSE
NONCO10696	chr9:74623052-74844160	0.3	ENSMUSG00000044976	339745	ENSMUSG00000043013	17762	EMPTY	EMPTY	FALSE	NONCO10696	chr9:74623052-74844160	0.3	ENSMUSG00000044976	339745	ENSMUSG00000043013	17762	EMPTY	EMPTY	1	9	4.3	turquoise	1.8	NA	EMPTY	0.03	0.14	0.18	0.04	0.65	EMPTY	FALSE	FALSE	FALSE	FALSE	FALSE	FALSE
NONCO107	chr1:34970122-34970672	0.5	ENSMUSG00000026123	90543	ENSMUSG00000045216	1097729	-0.43	0.13	FALSE	NONCO107	chr1:34970122-34970672	0.5	ENSMUSG00000026123	90543	ENSMUSG00000045216	1097729	-0.43	0.13	1	17	23141.4	brown	1	NA	EMPTY	0.35	0.14	2.46	0.1	3.4	RP23-348C6.7	FALSE	FALSE	FALSE	FALSE	TRUE	FALSE
NONCO10707	chr9:77367741-77370879	0.4	ENSMUSG00000032355	14773	ENSMUSG00000032352	59945	0.05	-0.05	FALSE	NONCO10707	chr9:77367741-77370879	0.4	ENSMUSG00000032355	14773	ENSMUSG00000032352	59945	0.05	-0.05	1	11	74288.8	brown4	2.6	0.7027	EMPTY	0.02	0.07	0.32	0.01	2.01	EMPTY	FALSE	FALSE	FALSE	FALSE	FALSE	FALSE
NONCO10716	chr9:79346807-79347313	50.6	ENSMUSG00000046186	630555	ENSMUSG00000032332	251679	-0.08	-0.3	TRUE	NONCO10716	chr9:79346807-79347313	50.6	ENSMUSG00000046186	630555	ENSMUSG00000032332	251679	-0.08	-0.3	0.0038	14	34.6	darkgreen	34.7	0	EMPTY	0.88	0.09	9.65	0.19	4.55	EMPTY	FALSE	FALSE	FALSE	FALSE	FALSE	FALSE
NONCO10725	chr9:82854943-82858387	1.1	ENSMUSG00000032251	7257	ENSMUSG00000032253	7773	-0.19	-0.26	FALSE	NONCO10725	chr9:82854943-82858387	1.1	ENSMUSG00000032251	7257	ENSMUSG00000032253	7773	-0.19	-0.26	0.254	22	129175	greenyellow	5.5	0.1919	EMPTY	0.07	0.06	1.17	0.13	0.58	EMPTY	FALSE	FALSE	FALSE	FALSE	FALSE	FALSE
NONCO10730	chr9:83678622-83686814	2.4	ENSMUSG00000032261	39822	ENSMUSG00000032262	91879	-0.04	0	FALSE	NONCO10730	chr9:83678622-83686814	2.4	ENSMUSG00000032261	39822	ENSMUSG00000032262	91879	-0.04	0	0.193	1	4.1	greenyellow	18.1	0.304	EMPTY	0.7	0.23	3.1	0.06	12.25	EMPTY	FALSE	FALSE	FALSE	TRUE	FALSE	FALSE
NONCO10733	chr9:84972849-84973485	9.1	ENSMUSG00000032263	848610	ENSMUSG00000079433	339289	EMPTY	EMPTY	FALSE	NONCO10733	chr9:84972849-84973485	9.1	ENSMUSG00000032263	848610	ENSMUSG00000079433	339289	EMPTY	EMPTY	0.3708	13	12.7	midnightblue	6.8	0.0283	EMPTY	0.79	0.01	126.73	0.51	1.55	EMPTY	FALSE	FALSE	FALSE	FALSE	FALSE	FALSE
NONCO10743	chr9:87125498-87127117	0.2	ENSMUSG00000032872	47725	ENSMUSG00000042761	17190	-0.36	0.13	FALSE	NONCO10743	chr9:87125498-87127117	0.2	ENSMUSG00000032872	47725	ENSMUSG00000042761	17190	-0.36	0.13	1	5	206154	brown	4.4	0.2598	EMPTY	EMPTY	EMPTY	EMPTY	EMPTY	EMPTY	EMPTY	FALSE	FALSE	FALSE	FALSE	FALSE	FALSE
NONCO10744	chr9:87127314-87127924	0.5	ENSMUSG00000032872	49541	ENSMUSG00000042761	16383	-0.16	-0.09	FALSE	NONCO10744	chr9:87127314-87127924	0.5	ENSMUSG00000032872	49541	ENSMUSG00000042761	16383	-0.16	-0.09	1	9	7.2	brown	1.8	NA	EMPTY	EMPTY	EMPTY	EMPTY	EMPTY	EMPTY	Gm8282	FALSE	FALSE	FALSE	FALSE	FALSE	FALSE
NONCO10749	chr9:88521050-88522945	76.1	ENSMUSG00000032423	38477	ENSMUSG00000032425	25076	0.38	-0.38	FALSE	NONCO10749	chr9:88521050-88522945	76.1	ENSMUSG00000032423	38477	ENSMUSG00000032425	25076	0.38	-0.38	0.5013	4	3	brown	628.3	0.0087	EMPTY	0.03	0.13	0.22	0.09	0.31	Snhg5	TRUE	FALSE	FALSE	TRUE	FALSE	FALSE
NONCO10753	chr9:88676333-88679806	0.9	ENSMUSG00000090693	87515	ENSMUSG00000079427	8797	0.74	0.04	FALSE	NONCO10753	chr9:88676333-88679806	0.9	ENSMUSG00000090693	87515	ENSMUSG00000079427	8797	0.74	0.04	1	15	3.1	lightyellow	14.8	0.9473	EMPTY	EMPTY	EMPTY	EMPTY	EMPTY	EMPTY	EMPTY	FALSE	FALSE	FALSE	FALSE	FALSE	TRUE
NONCO10756	chr9:90081885-90084105	0.2	ENSMUSG00000032359	5797	ENSMUSG00000062270	7561	-0.45	0.41	FALSE	NONCO10756	chr9:90081885-90084105	0.2	ENSMUSG00000032359	5797	ENSMUSG00000062270	7561	-0.45	0.41	0.0122	2	4.5	midnightblue	9.1	0.231	EMPTY	0.31	0	154.03	0.19	1.61	EMPTY	FALSE	FALSE	FALSE	FALSE	FALSE	FALSE
NONCO10758	chr9:90320082-90391779	2.5	ENSMUSG00000037410	49279	ENSMUSG00000032368	966280	0.53	-0.51	FALSE	NONCO10758	chr9:90320082-90391779	2.5	ENSMUSG00000037410	49279	ENSMUSG00000032368	966280	0.53	-0.51	0.4726	21	4.1	turquoise	3.7	0.8453	EMPTY	EMPTY	EMPTY	EMPTY	EMPTY	EMPTY	EMPTY	FALSE	FALSE	FALSE	FALSE	FALSE	FALSE
NONCO10759	chr9:90687231-90699107	2.9	ENSMUSG00000037410	416428	ENSMUSG00000032368	658952	-0.22	0.38	FALSE	NONCO10759	chr9:90687231-90699107	2.9	ENSMUSG00000037410	416428	ENSMUSG00000032368	658952	-0.22	0.38	1	9	23.9	greenyellow	6.2	0.1943	EMPTY	0	0.15	0	0.73	0	EMPTY	FALSE	FALSE	FALSE	FALSE	FALSE	FALSE
NONCO10760	chr9:90816999-90829273	3.4	ENSMUSG00000037410	546196	ENSMUSG00000032368	528786	0.27	-0.28	FALSE	NONCO10760	chr9:90816999-90829273	3.4	ENSMUSG00000037410	546196	ENSMUSG00000032368	528786	0.27	-0.28	1	17	4	yellowgreen	19.9	0.5707	EMPTY	0.4	0.14	2.81	0.18	2.17	Gm28703	FALSE	FALSE	FALSE	TRUE	FALSE	FALSE
NONCO10761	chr9:90857330-90864454	0.4	ENSMUSG00000037410	586527	ENSMUSG00000032368	493605	-0.22	0.14	FALSE	NONCO10761	chr9:90857330-90864454	0.4	ENSMUSG00000037410	586527	ENSMUSG00000032368	493605	-0.22	0.14	1	7	9	white	1.4	NA	EMPTY	EMPTY	EMPTY	EMPTY	EMPTY	EMPTY	EMPTY	FALSE	FALSE	FALSE	FALSE	FALSE	FALSE
NONCO10764	chr9:91097042-91098701	229.5	ENSMUSG00000037410	826239	ENSMUSG00000032368	259358	0.4	-0.45	FALSE	NONCO10764	chr9:91097042-91098701	229.5	ENSMUSG00000037410	826239	ENSMUSG00000032368	259358	0.4	-0.45	0.0795	22	5.9	turquoise	813	0	EMPTY	0.12	0.68	0.17	0.16	0.72	EMPTY	FALSE	FALSE	FALSE	TRUE	FALSE	FALSE
NONCO10767	chr9:91285332-91293669	1.5	ENSMUSG00000037410	1014529	ENSMUSG00000032368	64390	-0.3	0.61	FALSE	NONCO10767	chr9:91285332-91293669	1.5	ENSMUSG00000037410	1014529	ENSMUSG00000032368	64390	-0.3	0.61	1	13	352419	brown	10.9	0.008	EMPTY	EMPTY	EMPTY	EMPTY	EMPTY	EMPTY	EMPTY	FALSE	FALSE	FALSE	FALSE	FALSE	FALSE
NONCO10769	chr9:91922737-91961185	2.5	ENSMUSG00000036972	533390	ENSMUSG00000095654	231752	EMPTY	EMPTY	FALSE	NONCO10769	chr9:91922737-91961185	2.5	ENSMUSG00000036972	533390	ENSMUSG00000095654	231752	EMPTY	EMPTY	1	13	8.6	turquoise	12.7	0.5019	EMPTY	0	0.14	0.02	0.36	0.01	EMPTY	FALSE	FALSE	FALSE	TRUE	FALSE	FALSE
NONCO10793	chr9:96661367-96669728	0.1	ENSMUSG00000032413	29751	ENSMUSG00000040433	13043	-0.16	0.4	FALSE	NONCO10793	chr9:96661367-96669728	0.1	ENSMUSG00000032413	29751	ENSMUSG00000040433	13043	-0.16	0.4	0.9921	18	29709.7	sienna3	1.2	NA	EMPTY	0.09	0.07	1.27	0.13	0.66	EMPTY	FALSE	FALSE	FALSE	FALSE	FALSE	FALSE
NONCO10796	chr9:97066988-97070390	0.8	ENSMUSG00000046997	48146	ENSMUSG00000032449	4572	0.28	-0.03	FALSE	NONCO10796	chr9:97066988-97070390	0.8	ENSMUSG00000046997	48146	ENSMUSG00000032449	4572	0.28	-0.03	1	5	3.9	brown4	19.3	0.3254	EMPTY	0	0.02	0.06	0.19	0.01	EMPTY	FALSE	FALSE	FALSE	FALSE	FALSE	FALSE
NONCO108	chr1:35696882-35697278	3.4	ENSMUSG00000026123	817303	ENSMUSG00000045216	371123	-0.38	0.5	FALSE	NONCO108	chr1:35696882-35697278	3.4	ENSMUSG00000026123	817303	ENSMUSG00000045216	371123	-0.38	0.5	0.9921	6	3.6	greenyellow	6.6	0.4531	EMPTY	0.01	0.14	0.1	0.18	0.08	EMPTY	FALSE	FALSE	FALSE	FALSE	FALSE	FALSE
NONCO1080	chr1:60052404-60052912	0.7	ENSMUSG00000026018	9221	ENSMUSG00000026019	16874	-0.12	0.07	FALSE	NONCO1080	chr1:60052404-60052912	0.7	ENSMUSG00000026018	9221	ENSMUSG00000026019	16874	-0.12	0.07	1	16	14910.8	darkgreen	0.9	NA	ENSG00000225233	0.06	0.09	0.65	0.05	1.09	EMPTY	FALSE	FALSE	FALSE	FALSE	FALSE	FALSE
NONCO10801	chr9:98781419-98786214	0.2	ENSMUSG00000032459	179760	ENSMUSG00000091080	56290	EMPTY	EMPTY	FALSE	NONCO10801	chr9:98781419-98786214	0.2	ENSMUSG00000032459	179760	ENSMUSG00000091080	56290	EMPTY	EMPTY	0.193	16	3.9	orange	7.3	0.2106	ENSG00000259150	0.46	0.14	3.21	0.19	2.36	EMPTY	FALSE	FALSE	FALSE	FALSE	FALSE	FALSE
NONCO10812	chr9:101841954-101862706	3	ENSMUSG00000043154	590160	ENSMUSG00000032537	59423	0.28	0.15	FALSE	NONCO10812	chr9:101841954-101862706	3	ENSMUSG00000043154	590160	ENSMUSG00000032537	59423	0.28	0.15	0.129	4	11.7	midnightblue	15.8	0.0542	ENSG00000257647	0.59	0	143.18	0.11	5.4	Gm29521	FALSE	TRUE	TRUE	TRUE	FALSE	FALSE
NONCO1082	chr1:60156268-60157550	0.8	ENSMUSG00000026017	2316	ENSMUSG00000073664	23050	0.19	-0.01	FALSE	NONCO1082	chr1:60156268-60157550	0.8	ENSMUSG00000026017	2316	ENSMUSG00000073664	23050	0.19	-0.01	0.4726	1	98.7	greenyellow	10.2	0.2447	EMPTY	0.15	0.02	5.98	0.31	0.48	EMPTY	FALSE	FALSE	FALSE	FALSE	FALSE	FALSE
NONCO10827	chr9:104268236-104269734	0.3	ENSMUSG00000032560	5307	ENSMUSG00000032561	18583	-0.02	0.02	FALSE	NONCO10827	chr9:104268236-104269734	0.3	ENSMUSG00000032560	5307	ENSMUSG00000032561	18583	-0.02	0.02	1	17	23372.6	lightsteelblue1	1.2	NA	EMPTY	0.12	0.14	0.86	0.33	0.37	EMPTY	FALSE	FALSE	FALSE	FALSE	FALSE	FALSE
NONCO10836	chr9:106268286-106269458	0.8	ENSMUSG00000032786	20161	ENSMUSG00000023345	11604	-0.01	0.47	FALSE	NONCO10836	chr9:106268286-106269458	0.8	ENSMUSG00000032786	20161	ENSMUSG00000023345	11604	-0.01	0.47	1	11	69755.2	turquoise	3.5	0.3777	EMPTY	0.04	0	21.32	0.11	0.4	EMPTY	FALSE	FALSE	FALSE	TRUE	FALSE	FALSE
NONCO10850	chr9:107365599-107370615	1.7	ENSMUSG00000037977	13178	ENSMUSG00000010066	28998	-0.02	0.01	FALSE	NONCO10850	chr9:107365599-107370615	1.7	ENSMUSG00000037977	13178	ENSMUSG00000010066	28998	-0.02	0.01	0.4726	20	379741	blue	9.5	0.0207	ENSG00000259772	0.02	0.32	0.05	0.06	0.28	EMPTY	FALSE	FALSE	FALSE	FALSE	FALSE	FALSE
NONCO1088	chr1:60623449-60626319	1.9	ENSMUSG00000026014	56346	ENSMUSG00000026012	90482	0.06	0.13	FALSE	NONCO1088	chr1:60623449-60626319	1.9	ENSMUSG00000026014	56346	ENSMUSG00000026012	90482	0.06	0.13	1	11	113495	turquoise	3.8	0.2273	ENSG00000198468	0	0.12	0.03	0.05	0.06	EMPTY	FALSE	FALSE	FALSE	FALSE	FALSE	FALSE
NONCO1089	chr1:60595459-60598441	0.4	ENSMUSG00000026014	28356	ENSMUSG00000026012	118360	0.51	0.44	FALSE	NONCO1089	chr1:60595459-60598441	0.4	ENSMUSG00000026014	28356	ENSMUSG00000026012	118360	0.51	0.44	1	13	174905	brown4	4.5	0.1249	ENSG00000224535	0.35	0.11	3.27	0.03	13.46	RP23-17F2.6	FALSE	FALSE	FALSE	TRUE	FALSE	FALSE
NONCO109	chr1:35879519-35891290	4.8	ENSMUSG00000026123	999940	ENSMUSG00000045216	177111	0.01	0.04	FALSE	NONCO109	chr1:35879519-35891290	4.8	ENSMUSG00000026123	999940	ENSMUSG00000045216	177111	0.01	0.04	0.8745	1	4.3	brown	31	0.2076	EMPTY	0.05	0.39	0.14	0.11	0.49	RP24-72B22.1	FALSE	FALSE	FALSE	TRUE	FALSE	FALSE
NONCO1090	chr1:60703917-60705737	135.1	ENSMUSG00000026014	136814	ENSMUSG00000026012	11064	-0.05	-0.08	FALSE	NONCO1090	chr1:60703917-60705737	135.1	ENSMUSG00000026014	136814	ENSMUSG00000026012	11064	-0.05	-0.08	0.3159	5	2.3	midnightblue	448.9	0.0012	ENSG00000224535	0.75	0.23	3.24	0.01	74.26	Eif4a-ps4	FALSE	FALSE	FALSE	TRUE	TRUE	FALSE
NONCO10922	chr9:113071887-113123079	0.5	ENSMUSG00000032503	835950	ENSMUSG00000032504	528666	0.58	-0.42	FALSE	NONCO10922	chr9:113071887-113123079	0.5	ENSMUSG00000032503	835950	ENSMUSG00000032504	528666	0.58	-0.42	0.2979	20	74078.7	turquoise	3.2	0.0234	EMPTY	0.38	0.65	0.58	0.08	4.77	EMPTY	FALSE	TRUE	FALSE	TRUE	FALSE	FALSE
NONCO10924	chr9:113258576-113346468	0.5	ENSMUSG00000032503	1022639	ENSMUSG00000032504	305277	0.3	-0.39	FALSE	NONCO10924	chr9:113258576-113346468	0.5	ENSMUSG00000032503	1022639	ENSMUSG00000032504	305277	0.3	-0.39	1	9	111818	darkred	3.3	0.4926	EMPTY	0.03	0.37	0.08	0.01	5.33	EMPTY	FALSE	TRUE	FALSE	FALSE	FALSE	FALSE
NONCO10926	chr9:113470115-113587626	7.1	ENSMUSG00000032503	1234178	ENSMUSG00000032504	64119	0.51	-0.5	FALSE	NONCO10926	chr9:113470115-113587626	7.1	ENSMUSG00000032503	1234178	ENSMUSG00000032504	64119	0.51	-0.5	0.0634	20	488353	blue	24.6	0.001	EMPTY	0.04	0.06	0.63	0.11	0.34	EMPTY	FALSE	TRUE	FALSE	FALSE	FALSE	FALSE
NONCO10933	chr9:114647435-114655562	1.1	ENSMUSG00000056167	7236	ENSMUSG00000032435	33229	0.29	0.22	FALSE	NONCO10933	chr9:114647435-114655562	1.1	ENSMUSG00000056167	7236	ENSMUSG00000032435	33229	0.29	0.22	1	7	2.6	midnightblue	12.4	0.8897	EMPTY	0.13	0.08	1.68	0.33	0.39	EMPTY	FALSE	FALSE	FALSE	TRUE	TRUE	FALSE
NONCO10952	chr9:118920701-118921353	0	ENSMUSG00000039115	19699	ENSMUSG00000047409	5101	0.19	0.02	FALSE	NONCO10952	chr9:118920701-118921353	0	ENSMUSG00000039115	19699	ENSMUSG00000047409	5101	0.19	0.02	0.1539	22	98763.1	darkorange	2.6	0.0237	EMPTY	0	0.69	0	0.05	0.04	EMPTY	FALSE	FALSE	FALSE	FALSE	FALSE	FALSE
NONCO10981	chr9:121515918-121525516	0.6	ENSMUSG00000032532	20230	ENSMUSG00000032530	52328	0.08	0.03	FALSE	NONCO10981	chr9:121515918-121525516	0.6	ENSMUSG00000032532	20230	ENSMUSG00000032530	52328	0.08	0.03	1	20	105494	turquoise	5.1	0.2049	EMPTY	0.21	0.01	14.38	0.02	12.36	EMPTY	FALSE	FALSE	FALSE	FALSE	FALSE	FALSE
NONCO10995	chr9:122905594-122905982	0.3	ENSMUSG00000063488	9471	ENSMUSG00000057895	17091	EMPTY	EMPTY	FALSE	NONCO10995	chr9:122905594-122905982	0.3	ENSMUSG00000063488	9471	ENSMUSG00000057895	17091	EMPTY	EMPTY	1	17	5.4	paleturquoise	4.6	0.8382	EMPTY	0.01	0.06	0.12	0.05	0.15	EMPTY	FALSE	FALSE	FALSE	FALSE	FALSE	FALSE
NONCO11004	chr9:124268496-124282538	69.4	ENSMUSG00000079227	120798	ENSMUSG00000074829	9267	EMPTY	EMPTY	TRUE	NONCO11004	chr9:124268496-124282538	69.4	ENSMUSG00000079227	120798	ENSMUSG00000074829	9267	EMPTY	EMPTY	0.0149	2	1.8	midnightblue	530.2	0.0023	EMPTY	EMPTY	EMPTY	EMPTY	EMPTY	EMPTY	EMPTY	FALSE	FALSE	FALSE	FALSE	FALSE	FALSE
NONCO11041	chrX:8790042-8792009	10.4	ENSMUSG00000035371	35456	ENSMUSG00000071816	11683	EMPTY	EMPTY	FALSE	NONCO11041	chrX:8790042-8792009	10.4	ENSMUSG00000035371	35456	ENSMUSG00000071816	11683	EMPTY	EMPTY	1	5	3.2	brown	88.6	0.5541	EMPTY	EMPTY	EMPTY	EMPTY	EMPTY	EMPTY	EMPTY	FALSE	FALSE	FALSE	FALSE	FALSE	TRUE
NONCO11042	chrX:9326797-9328088	2.8	ENSMUSG00000015342	13548	ENSMUSG00000100448	22540	EMPTY	EMPTY	FALSE	NONCO11042	chrX:9326797-9328088	2.8	ENSMUSG00000015342	13548	ENSMUSG00000100448	22540	EMPTY	EMPTY	0.0795	12	4.1	darkgreen	24.4	0.0272	EMPTY	0.98	0.14	6.89	0.19	5.05	Gm6829	FALSE	FALSE	FALSE	FALSE	FALSE	FALSE
NONCO11048	chrX:10696483-10702886	1.6	ENSMUSG00000058254	99879	ENSMUSG00000008035	12128	-0.43	0.1	FALSE	NONCO11048	chrX:10696483-10702886	1.6	ENSMUSG00000058254	99879	ENSMUSG00000008035	12128	-0.43	0.1	0.2287	9	8	brown	19	NA	EMPTY	0	0	2.2	0.05	0.05	Gm14480	FALSE	FALSE	FALSE	TRUE	TRUE	FALSE
NONCO11049	chrX:10884012-10912060	0.3	ENSMUSG00000008035	164323	ENSMUSG00000100626	387198	EMPTY	EMPTY	FALSE	NONCO11049	chrX:10884012-10912060	0.3	ENSMUSG00000008035	164323	ENSMUSG00000100626	387198	EMPTY	EMPTY	1	9	7.1	lightyellow	2.9	0.9891	EMPTY	0.8	0.14	5.65	0.07	11	EMPTY	FALSE	FALSE	FALSE	FALSE	FALSE	FALSE
NONCO11053	chrX:11874525-11888474	0.5	ENSMUSG00000069038	546375	ENSMUSG00000040363	148267	EMPTY	EMPTY	FALSE	NONCO11053	chrX:11874525-11888474	0.5	ENSMUSG00000069038	546375	ENSMUSG00000040363	148267	EMPTY	EMPTY	0.9417	14	89753.8	darkgreen	2.9	0.2896	EMPTY	0.15	0.14	1.06	0.24	0.59	EMPTY	FALSE	FALSE	FALSE	FALSE	FALSE	FALSE
NONCO11057	chrX:12953031-12954094	0.3	ENSMUSG00000064127	190959	ENSMUSG00000031010	117405	-0.11	-0.16	FALSE	NONCO11057	chrX:12953031-12954094	0.3	ENSMUSG00000064127	190959	ENSMUSG00000031010	117405	-0.11	-0.16	0.2156	22	91732.7	lightyellow	3.6	0.1921	EMPTY	0.27	0.14	1.9	0.1	2.79	EMPTY	FALSE	FALSE	FALSE	FALSE	FALSE	FALSE
NONCO11059	chrX:13217911-13218671	22	ENSMUSG00000031010	44584	ENSMUSG00000000787	62300	0.14	0.12	FALSE	NONCO11059	chrX:13217911-13218671	22	ENSMUSG00000031010	44584	ENSMUSG00000000787	62300	0.14	0.12	1	9	1.8	midnightblue	17.1	0.8587	EMPTY	0.57	0.02	25.59	0.19	2.96	Llph-ps2	FALSE	FALSE	FALSE	TRUE	TRUE	FALSE
NONCO11068	chrX:19237215-19241787	0.7	ENSMUSG00000037358	775819	ENSMUSG00000068149	237634	EMPTY	EMPTY	FALSE	NONCO11068	chrX:19237215-19241787	0.7	ENSMUSG00000037358	775819	ENSMUSG00000068149	237634	EMPTY	EMPTY	1	0	180056	brown	7.1	0.1118	EMPTY	0.27	0.05	5.38	0.05	5.34	EMPTY	FALSE	FALSE	FALSE	FALSE	FALSE	TRUE
NONCO11071	chrX:20581025-20587437	1663.4	ENSMUSG00000023070	18937	ENSMUSG00000031059	27890	-0.3	0.48	FALSE	NONCO11071	chrX:20581025-20587437	1663.4	ENSMUSG00000023070	18937	ENSMUSG00000031059	27890	-0.3	0.48	0.1619	8	4.1	midnightblue	2590.1	0	EMPTY	0.25	0.01	38.82	0.19	1.27	Gm14539	FALSE	FALSE	FALSE	TRUE	TRUE	FALSE
NONCO11083	chrX:23515712-23565730	3.8	ENSMUSG00000036782	150631	ENSMUSG00000036769	127322	-0.52	-0.82	FALSE	NONCO11083	chrX:23515712-23565730	3.8	ENSMUSG00000036782	150631	ENSMUSG00000036769	127322	-0.52	-0.82	0.193	10	7.6	brown	11.8	0.0141	ENSG00000254975	0	0.1	0.04	0.09	0.05	EMPTY	FALSE	FALSE	FALSE	FALSE	FALSE	FALSE
NONCO11090	chrX:33507822-33509230	9	ENSMUSG00000095264	107699	ENSMUSG00000101294	66169	EMPTY	EMPTY	FALSE	NONCO11090	chrX:33507822-33509230	9	ENSMUSG00000095264	107699	ENSMUSG00000101294	66169	EMPTY	EMPTY	1	4	11	brown	0.8	NA	ENSG00000255362	0.03	0.14	0.19	0.05	0.61	EMPTY	FALSE	FALSE	FALSE	FALSE	FALSE	FALSE
NONCO11092	chrX:36213509-36214168	13.2	ENSMUSG00000036699	14352	ENSMUSG00000016239	114186	-0.56	0.02	FALSE	NONCO11092	chrX:36213509-36214168	13.2	ENSMUSG00000036699	14352	ENSMUSG00000016239	114186	-0.56	0.02	0.5013	12	3.6	midnightblue	5.9	0.6232	EMPTY	1	0.14	7.04	0.12	8.06	Gm6023	FALSE	FALSE	FALSE	FALSE	TRUE	FALSE
NONCO11105	chrX:38473577-38482532	5.9	ENSMUSG00000016534	17124	ENSMUSG00000031095	50743	-0.15	-0.35	FALSE	NONCO11105	chrX:38473577-38482532	5.9	ENSMUSG00000016534	17124	ENSMUSG00000031095	50743	-0.15	-0.35	0.8745	18	5	blue	76.7	0.023	EMPTY	0.19	0.27	0.7	0.22	0.87	Gm7598	TRUE	FALSE	TRUE	TRUE	TRUE	FALSE
NONCO11106	chrX:38505546-38506375	2.6	ENSMUSG00000016534	49093	ENSMUSG00000031095	26900	-0.44	-0.28	FALSE	NONCO11106	chrX:38505546-38506375	2.6	ENSMUSG00000016534	49093	ENSMUSG00000031095	26900	-0.44	-0.28	0.7225	12	15.7	midnightblue	2.2	0.2866	EMPTY	0.21	0.51	0.41	0.19	1.09	EMPTY	FALSE	FALSE	FALSE	FALSE	FALSE	FALSE
NONCO11111	chrX:38733910-38755818	9.9	ENSMUSG00000048970	98824	ENSMUSG00000051361	16854	0.43	0.86	FALSE	NONCO11111	chrX:38733910-38755818	9.9	ENSMUSG00000048970	98824	ENSMUSG00000051361	16854	0.43	0.86	0.0366	22	14.7	turquoise	8.7	0.0595	EMPTY	0.15	0.12	1.18	0.11	1.33	EMPTY	FALSE	FALSE	FALSE	FALSE	FALSE	FALSE
NONCO11124	chrX:48009953-48011080	96.3	ENSMUSG00000001173	44086	ENSMUSG00000037010	14067	-0.52	0.48	FALSE	NONCO11124	chrX:48009953-48011080	96.3	ENSMUSG00000001173	44086	ENSMUSG00000037010	14067	-0.52	0.48	0.0661	16	2.8	darkgreen	945	0	EMPTY	0.99	0.01	132.24	0.06	15.62	EMPTY	FALSE	FALSE	FALSE	TRUE	TRUE	FALSE
NONCO1113	chr1:63250499-63253147	1.1	ENSMUSG00000046856	35957	ENSMUSG00000027520	20119	-0.49	0.45	FALSE	NONCO1113	chr1:63250499-63253147	1.1	ENSMUSG00000046856	35957	ENSMUSG00000027520	20119	-0.49	0.45	0.9417	8	69.4	midnightblue	6.2	0.1974	EMPTY	0.2	0.14	1.44	0.02	12.39	EMPTY	FALSE	FALSE	FALSE	TRUE	FALSE	FALSE
NONCO11131	chrX:50537314-50562956	57.3	ENSMUSG00000048173	110821	ENSMUSG00000031112	278092	EMPTY	EMPTY	FALSE	NONCO11131	chrX:50537314-50562956	57.3	ENSMUSG00000048173	110821	ENSMUSG00000031112	278092	EMPTY	EMPTY	0.1367	4	2.7	violet	192.5	0.0381	EMPTY	0.04	0.02	1.87	0.01	2.59	EMPTY	FALSE	TRUE	FALSE	TRUE	FALSE	FALSE
NONCO11132	chrX:50563121-50635321	10.8	ENSMUSG00000048173	136628	ENSMUSG00000031112	205727	EMPTY	EMPTY	FALSE	NONCO11132	chrX:50563121-50635321	10.8	ENSMUSG00000048173	136628	ENSMUSG00000031112	205727	EMPTY	EMPTY	1	11	104682	brown	2.9	0.074	EMPTY	0.02	0.13	0.15	0.09	0.22	Firre	FALSE	TRUE	FALSE	TRUE	FALSE	FALSE
NONCO11138	chrX:52772290-52784156	1029.9	ENSMUSG00000055653	158341	ENSMUSG00000073207	7045	0.86	-0.09	TRUE	NONCO11138	chrX:52772290-52784156	1029.9	ENSMUSG00000055653	158341	ENSMUSG00000073207	7045	0.86	-0.09	0.0259	5	5.1	midnightblue	1396.3	0	EMPTY	0.6	0.1	6.15	0.01	105.45	Gm14586	FALSE	FALSE	FALSE	TRUE	TRUE	FALSE
NONCO11141	chrX:53461180-53463624	0.2	ENSMUSG00000060967	17605	ENSMUSG00000079593	113464	EMPTY	EMPTY	FALSE	NONCO11141	chrX:53461180-53463624	0.2	ENSMUSG00000060967	17605	ENSMUSG00000079593	113464	EMPTY	EMPTY	1	11	32132	turquoise	1.3	NA	EMPTY	0.27	0.03	9.2	0.05	5.02	EMPTY	FALSE	TRUE	FALSE	FALSE	FALSE	FALSE
NONCO11145	chrX:53693885-53696403	0.2	ENSMUSG00000067924	23478	ENSMUSG00000055555	28424	-0.38	-0.33	FALSE	NONCO11145	chrX:53693885-53696403	0.2	ENSMUSG00000067924	23478	ENSMUSG00000055555	28424	-0.38	-0.33	0.5461	19	36358.4	sienna3	1.1	NA	ENSG00000236897	0.01	0	28.29	0.26	0.04	EMPTY	FALSE	FALSE	FALSE	FALSE	FALSE	FALSE
NONCO11148	chrX:54179302-54185412	0.4	ENSMUSG00000054626	381597	ENSMUSG00000096468	345797	EMPTY	EMPTY	FALSE	NONCO11148	chrX:54179302-54185412	0.4	ENSMUSG00000054626	381597	ENSMUSG00000096468	345797	EMPTY	EMPTY	1	13	106925	brown4	3.6	0.5768	EMPTY	EMPTY	EMPTY	EMPTY	EMPTY	EMPTY	EMPTY	FALSE	FALSE	FALSE	FALSE	FALSE	FALSE
NONCO11153	chrX:56390091-56391160	0.4	ENSMUSG00000054850	12293	ENSMUSG00000058932	56806	EMPTY	EMPTY	FALSE	NONCO11153	chrX:56390091-56391160	0.4	ENSMUSG00000054850	12293	ENSMUSG00000058932	56806	EMPTY	EMPTY	1	15	90914.4	darkorange	5.3	0.6814	EMPTY	0.25	0	50.64	0.08	3.22	EMPTY	FALSE	FALSE	FALSE	FALSE	FALSE	FALSE
NONCO11160	chrX:57708833-57966818	3	ENSMUSG00000036357	205077	ENSMUSG00000067860	55883	0.39	0.04	FALSE	NONCO11160	chrX:57708833-57966818	3	ENSMUSG00000036357	205077	ENSMUSG00000067860	55883	0.39	0.04	0.129	21	9	blue	13	0.348	EMPTY	1	0.13	7.72	0.31	3.26	EMPTY	FALSE	FALSE	FALSE	TRUE	FALSE	FALSE
NONCO11166	chrX:60045119-60046376	1.4	ENSMUSG00000031138	14361	ENSMUSG00000031139	9581	-0.23	0.02	FALSE	NONCO11166	chrX:60045119-60046376	1.4	ENSMUSG00000031138	14361	ENSMUSG00000031139	9581	-0.23	0.02	1	14	17314.2	lightyellow	1.1	NA	EMPTY	0.99	0	377.46	0.19	5.12	Gm5637	FALSE	FALSE	FALSE	TRUE	TRUE	FALSE
NONCO11170	chrX:60726950-60727523	13.9	ENSMUSG00000062949	134253	ENSMUSG00000045179	163844	-0.26	-0.78	FALSE	NONCO11170	chrX:60726950-60727523	13.9	ENSMUSG00000062949	134253	ENSMUSG00000045179	163844	-0.26	-0.78	0.0661	18	4.6	turquoise	24	0.0073	EMPTY	0.64	0.12	5.24	0.07	8.76	EMPTY	FALSE	FALSE	FALSE	TRUE	FALSE	FALSE
NONCO11172	chrX:61147632-61149404	0.2	ENSMUSG00000045179	254203	ENSMUSG00000090546	33843	0.31	-0.24	FALSE	NONCO11172	chrX:61147632-61149404	0.2	ENSMUSG00000045179	254203	ENSMUSG00000090546	33843	0.31	-0.24	1	9	4.3	brown	1.8	NA	ENSG00000255179	EMPTY	EMPTY	EMPTY	EMPTY	EMPTY	EMPTY	FALSE	FALSE	FALSE	FALSE	FALSE	FALSE
NONCO11173	chrX:62775133-62776743	2.8	ENSMUSG00000031194	306322	ENSMUSG00000079579	1374663	EMPTY	EMPTY	FALSE	NONCO11173	chrX:62775133-62776743	2.8	ENSMUSG00000031194	306322	ENSMUSG00000079579	1374663	EMPTY	EMPTY	1	15	5.5	darkorange	1.3	NA	EMPTY	0.81	0.02	46.62	0.1	8.22	Gm14680	FALSE	FALSE	FALSE	FALSE	TRUE	FALSE
NONCO11175	chrX:64496585-64498937	23.6	ENSMUSG00000046699	219590	ENSMUSG00000031181	548708	EMPTY	EMPTY	FALSE	NONCO11175	chrX:64496585-64498937	23.6	ENSMUSG00000046699	219590	ENSMUSG00000031181	548708	EMPTY	EMPTY	1	7	3.2	violet	11.1	0.2377	EMPTY	EMPTY	EMPTY	EMPTY	EMPTY	EMPTY	EMPTY	FALSE	FALSE	FALSE	TRUE	TRUE	FALSE
NONCO1118	chr1:63916941-63992705	0.3	ENSMUSG00000025961	147675	ENSMUSG00000025959	36743	0.29	0	FALSE	NONCO1118	chr1:63916941-63992705	0.3	ENSMUSG00000025961	147675	ENSMUSG00000025959	36743	0.29	0	1	5	102892	darkorange	4.5	0.1224	EMPTY	0.02	0.01	3.95	0.17	0.14	EMPTY	FALSE	FALSE	FALSE	TRUE	FALSE	FALSE
NONCO11194	chrX:73395390-73396848	0.9	ENSMUSG00000031365	36311	ENSMUSG00000031374	14249	0.09	-0.43	FALSE	NONCO11194	chrX:73395390-73396848	0.9	ENSMUSG00000031365	36311	ENSMUSG00000031374	14249	0.09	-0.43	1	7	342614	salmon4	13.6	0.0003	EMPTY	0.01	0	17.99	0.01	1.37	EMPTY	FALSE	FALSE	FALSE	FALSE	FALSE	FALSE
NONCO11195	chrX:73582783-73587725	0.4	ENSMUSG00000031376	11779	ENSMUSG00000031383	51695	0.32	-0.09	FALSE	NONCO11195	chrX:73582783-73587725	0.4	ENSMUSG00000031376	11779	ENSMUSG00000031383	51695	0.32	-0.09	0.6669	22	69610	turquoise	2.8	0.1405	EMPTY	0	0	2.19	0.43	0.01	EMPTY	FALSE	FALSE	FALSE	FALSE	FALSE	FALSE
NONCO11211	chrX:75475084-75475654	18.6	ENSMUSG00000031201	21084	ENSMUSG00000031197	38646	-0.23	0	TRUE	NONCO11211	chrX:75475084-75475654	18.6	ENSMUSG00000031201	21084	ENSMUSG00000031197	38646	-0.23	0	0.0377	10	10.8	midnightblue	33.7	0	EMPTY	0.85	0.09	9.18	0.26	3.22	Gm8666	FALSE	FALSE	FALSE	TRUE	TRUE	FALSE
NONCO11216	chrX:75643588-75649888	1.4	ENSMUSG00000031202	65358	ENSMUSG00000016382	135767	0.57	-0.22	FALSE	NONCO11216	chrX:75643588-75649888	1.4	ENSMUSG00000031202	65358	ENSMUSG00000016382	135767	0.57	-0.22	1	7	4.5	blue	12.1	0.7913	ENSG00000250041	EMPTY	EMPTY	EMPTY	EMPTY	EMPTY	EMPTY	FALSE	FALSE	FALSE	FALSE	FALSE	FALSE
NONCO11217	chrX:75674718-75727600	1.6	ENSMUSG00000031202	96488	ENSMUSG00000016382	58055	-0.11	-0.08	FALSE	NONCO11217	chrX:75674718-75727600	1.6	ENSMUSG00000031202	96488	ENSMUSG00000016382	58055	-0.11	-0.08	1	5	2	greenyellow	17.6	0.9853	EMPTY	0.21	0.72	0.29	0.05	4.67	4933407K13Rik	FALSE	FALSE	FALSE	FALSE	FALSE	FALSE
NONCO11219	chrX:75987177-75987407	96.1	ENSMUSG00000016382	111996	ENSMUSG00000071738	276898	EMPTY	EMPTY	FALSE	NONCO11219	chrX:75987177-75987407	96.1	ENSMUSG00000016382	111996	ENSMUSG00000071738	276898	EMPTY	EMPTY	0.1085	8	63503.9	midnightblue	2.1	0.0034	EMPTY	1	0.14	7.04	0.18	5.62	Gm8692	FALSE	FALSE	FALSE	FALSE	TRUE	FALSE
NONCO11226	chrX:80532860-80536774	41.8	ENSMUSG00000046942	861426	ENSMUSG00000025666	533925	EMPTY	EMPTY	FALSE	NONCO11226	chrX:80532860-80536774	41.8	ENSMUSG00000046942	861426	ENSMUSG00000025666	533925	EMPTY	EMPTY	0.0377	2	1.8	brown	172.7	0.0697	ENSG00000245017	0.64	0.4	1.61	0.07	8.99	Gm8806	FALSE	FALSE	FALSE	TRUE	TRUE	FALSE
NONCO11228	chrX:81820378-81822920	27.8	ENSMUSG00000060673	362258	ENSMUSG00000045103	1125951	EMPTY	EMPTY	FALSE	NONCO11228	chrX:81820378-81822920	27.8	ENSMUSG00000060673	362258	ENSMUSG00000045103	1125951	EMPTY	EMPTY	0.1619	13	6.5	darkgreen	17.6	0.0005	ENSG00000255558	0.84	0.14	5.91	0.19	4.33	Gm8822	FALSE	FALSE	FALSE	TRUE	TRUE	FALSE
NONCO11229	chrX:82814658-82930269	7.4	ENSMUSG00000060673	1356538	ENSMUSG00000045103	18602	EMPTY	EMPTY	FALSE	NONCO11229	chrX:82814658-82930269	7.4	ENSMUSG00000060673	1356538	ENSMUSG00000045103	18602	EMPTY	EMPTY	0.3708	0	2.2	blue	15.8	0.7637	ENSG00000255558	0.17	0.38	0.44	0.11	1.49	EMPTY	FALSE	FALSE	FALSE	TRUE	FALSE	FALSE
NONCO11238	chrX:88759471-88760350	49.9	ENSMUSG00000052372	643827	ENSMUSG00000035395	643499	EMPTY	EMPTY	FALSE	NONCO11238	chrX:88759471-88760350	49.9	ENSMUSG00000052372	643827	ENSMUSG00000035395	643499	EMPTY	EMPTY	0.114	18	5.9	darkgreen	235.2	0.0023	EMPTY	0.01	0.11	0.11	0.19	0.07	Gm27000,Gm27335,Mir1906-2	FALSE	FALSE	FALSE	TRUE	TRUE	FALSE
NONCO11239	chrX:90744395-90745232	285.4	ENSMUSG00000035387	811544	ENSMUSG00000091497	146911	EMPTY	EMPTY	TRUE	NONCO11239	chrX:90744395-90745232	285.4	ENSMUSG00000035387	811544	ENSMUSG00000091497	146911	EMPTY	EMPTY	0.0047	13	75.1	darkgreen	113.6	0	EMPTY	0.92	0.14	6.49	0.15	6.18	Gm6977	FALSE	FALSE	FALSE	TRUE	TRUE	FALSE
NONCO11250	chrX:94743952-94745279	0.4	ENSMUSG00000073062	13766	ENSMUSG00000071722	277232	-0.48	-0.42	FALSE	NONCO11250	chrX:94743952-94745279	0.4	ENSMUSG00000073062	13766	ENSMUSG00000071722	277232	-0.48	-0.42	0.2287	18	16.8	darkgreen	3	0.5506	EMPTY	0.16	0.37	0.45	0.07	2.5	EMPTY	FALSE	FALSE	FALSE	FALSE	FALSE	FALSE
NONCO11251	chrX:94774953-94775701	1.7	ENSMUSG00000073062	44767	ENSMUSG00000071722	246810	0.15	-0.07	FALSE	NONCO11251	chrX:94774953-94775701	1.7	ENSMUSG00000073062	44767	ENSMUSG00000071722	246810	0.15	-0.07	1	7	5.9	brown	5.9	0.3707	ENSG00000258131	0.71	0.37	1.95	0.11	6.49	Gm14830	FALSE	FALSE	FALSE	TRUE	TRUE	FALSE
NONCO11253	chrX:94792674-94799029	3.9	ENSMUSG00000073062	62488	ENSMUSG00000071722	223482	0.51	0.13	FALSE	NONCO11253	chrX:94792674-94799029	3.9	ENSMUSG00000073062	62488	ENSMUSG00000071722	223482	0.51	0.13	0.0661	5	3.2	brown	177.7	0.0027	EMPTY	0.18	0.37	0.5	0.05	3.94	Gm26617,Zxda	FALSE	FALSE	TRUE	TRUE	FALSE	FALSE
NONCO11254	chrX:94827760-94990847	1	ENSMUSG00000073062	97574	ENSMUSG00000071722	31664	-0.3	0.32	FALSE	NONCO11254	chrX:94827760-94990847	1	ENSMUSG00000073062	97574	ENSMUSG00000071722	31664	-0.3	0.32	1	5	76754.5	darkred	2.9	0.0677	EMPTY	0	0.04	0.03	0.32	0	EMPTY	FALSE	FALSE	FALSE	TRUE	FALSE	FALSE
NONCO11267	chrX:99455783-99457730	4.7	ENSMUSG00000031217	306793	ENSMUSG00000034403	8005	0.22	-0.08	FALSE	NONCO11267	chrX:99455783-99457730	4.7	ENSMUSG00000031217	306793	ENSMUSG00000034403	8005	0.22	-0.08	0.8278	4	3.1	midnightblue	25.8	0.8817	EMPTY	0.09	0.6	0.16	0.06	1.71	EMPTY	FALSE	FALSE	FALSE	TRUE	FALSE	FALSE
NONCO11280	chrX:101490342-101518403	1.5	ENSMUSG00000031312	36802	ENSMUSG00000031314	14332	0.34	-0.19	FALSE	NONCO11280	chrX:101490342-101518403	1.5	ENSMUSG00000031312	36802	ENSMUSG00000031314	14332	0.34	-0.19	1	8	7.8	brown	11.7	0.0768	EMPTY	EMPTY	EMPTY	EMPTY	EMPTY	EMPTY	EMPTY	FALSE	FALSE	FALSE	FALSE	FALSE	FALSE
NONCO11283	chrX:101745218-101751252	1.4	ENSMUSG00000050232	10950	ENSMUSG00000046774	43405	EMPTY	EMPTY	FALSE	NONCO11283	chrX:101745218-101751252	1.4	ENSMUSG00000050232	10950	ENSMUSG00000046774	43405	EMPTY	EMPTY	0.2156	8	280784	midnightblue	7	0.0188	EMPTY	EMPTY	EMPTY	EMPTY	EMPTY	EMPTY	EMPTY	FALSE	FALSE	FALSE	FALSE	FALSE	FALSE
NONCO11290	chrX:102926692-102928110	0.3	ENSMUSG00000079476	17042	ENSMUSG00000082229	256067	EMPTY	EMPTY	FALSE	NONCO11290	chrX:102926692-102928110	0.3	ENSMUSG00000079476	17042	ENSMUSG00000082229	256067	EMPTY	EMPTY	1	11	115970	turquoise	5.6	0.3896	EMPTY	0.08	0.87	0.1	0.02	4.4	EMPTY	FALSE	FALSE	FALSE	FALSE	FALSE	FALSE
NONCO11291	chrX:102932380-102944067	1.2	ENSMUSG00000079476	22730	ENSMUSG00000082229	240110	EMPTY	EMPTY	FALSE	NONCO11291	chrX:102932380-102944067	1.2	ENSMUSG00000079476	22730	ENSMUSG00000082229	240110	EMPTY	EMPTY	1	11	5.4	brown	11	0.7239	EMPTY	EMPTY	EMPTY	EMPTY	EMPTY	EMPTY	EMPTY	FALSE	FALSE	FALSE	FALSE	FALSE	FALSE
NONCO11292	chrX:103014694-103018521	17.8	ENSMUSG00000079476	105044	ENSMUSG00000082229	165656	EMPTY	EMPTY	FALSE	NONCO11292	chrX:103014694-103018521	17.8	ENSMUSG00000079476	105044	ENSMUSG00000082229	165656	EMPTY	EMPTY	0.0548	5	7.2	midnightblue	35.1	0	EMPTY	0.06	0.16	0.36	0.14	0.42	EMPTY	FALSE	FALSE	FALSE	FALSE	FALSE	FALSE
NONCO11294	chrX:103063184-103081500	25.8	ENSMUSG00000079476	153534	ENSMUSG00000082229	102677	EMPTY	EMPTY	TRUE	NONCO11294	chrX:103063184-103081500	25.8	ENSMUSG00000079476	153534	ENSMUSG00000082229	102677	EMPTY	EMPTY	0.0032	6	10.2	midnightblue	236.6	0	ENSG00000261090	0.06	0.16	0.41	0.29	0.23	EMPTY	FALSE	FALSE	FALSE	FALSE	FALSE	FALSE
NONCO11295	chrX:103068819-103084872	0.3	ENSMUSG00000079476	159169	ENSMUSG00000082229	99305	EMPTY	EMPTY	FALSE	NONCO11295	chrX:103068819-103084872	0.3	ENSMUSG00000079476	159169	ENSMUSG00000082229	99305	EMPTY	EMPTY	1	7	83438.8	turquoise	4.2	0.0632	EMPTY	0.27	0.08	3.48	0.57	0.47	EMPTY	FALSE	FALSE	FALSE	FALSE	FALSE	FALSE
NONCO11296	chrX:103136061-103141355	2	ENSMUSG00000079476	226411	ENSMUSG00000082229	42822	EMPTY	EMPTY	TRUE	NONCO11296	chrX:103136061-103141355	2	ENSMUSG00000079476	226411	ENSMUSG00000082229	42822	EMPTY	EMPTY	0.0149	12	21	darkgreen	4.3	0.019	EMPTY	0.18	0.47	0.39	0.19	0.95	EMPTY	FALSE	FALSE	FALSE	FALSE	FALSE	FALSE
NONCO11297	chrX:103162391-103164981	18.9	ENSMUSG00000079476	252741	ENSMUSG00000082229	19196	EMPTY	EMPTY	FALSE	NONCO11297	chrX:103162391-103164981	18.9	ENSMUSG00000079476	252741	ENSMUSG00000082229	19196	EMPTY	EMPTY	0.2287	5	5.9	midnightblue	24.3	0.0643	EMPTY	0.94	0.47	2.01	0.19	4.85	Gm6206	FALSE	FALSE	FALSE	TRUE	TRUE	FALSE
NONCO11300	chrX:103577254-103590949	2.8	ENSMUSG00000098078	95550	ENSMUSG00000031330	39638	EMPTY	EMPTY	FALSE	NONCO11300	chrX:103577254-103590949	2.8	ENSMUSG00000098078	95550	ENSMUSG00000031330	39638	EMPTY	EMPTY	0.1367	6	3	midnightblue	79.2	0.183	EMPTY	0.01	0.12	0.1	0.13	0.09	EMPTY	FALSE	FALSE	FALSE	TRUE	FALSE	FALSE
NONCO11301	chrX:103637677-103677630	1.1	ENSMUSG00000031330	6008	ENSMUSG00000033965	19785	EMPTY	EMPTY	FALSE	NONCO11301	chrX:103637677-103677630	1.1	ENSMUSG00000031330	6008	ENSMUSG00000033965	19785	EMPTY	EMPTY	1	5	4	white	5.4	0.7623	EMPTY	0.12	0.78	0.16	0.12	1.03	Gm14874	FALSE	FALSE	FALSE	TRUE	FALSE	FALSE
NONCO11317	chrX:105164441-105165258	3.2	ENSMUSG00000031227	40515	ENSMUSG00000090132	334515	EMPTY	EMPTY	FALSE	NONCO11317	chrX:105164441-105165258	3.2	ENSMUSG00000031227	40515	ENSMUSG00000090132	334515	EMPTY	EMPTY	0.4325	6	5.5	midnightblue	7.8	0.1488	EMPTY	0.06	0.12	0.46	0.05	1.05	E530001F21Rik	FALSE	FALSE	FALSE	FALSE	TRUE	FALSE
NONCO11318	chrX:105182394-105184641	1.1	ENSMUSG00000031227	58468	ENSMUSG00000090132	315132	EMPTY	EMPTY	FALSE	NONCO11318	chrX:105182394-105184641	1.1	ENSMUSG00000031227	58468	ENSMUSG00000090132	315132	EMPTY	EMPTY	0.3482	10	8.1	midnightblue	21	0.3263	EMPTY	0.32	0.12	2.59	0.07	4.66	EMPTY	FALSE	FALSE	FALSE	FALSE	FALSE	FALSE
NONCO11319	chrX:105270103-105310831	3.5	ENSMUSG00000031227	146177	ENSMUSG00000090132	188942	EMPTY	EMPTY	FALSE	NONCO11319	chrX:105270103-105310831	3.5	ENSMUSG00000031227	146177	ENSMUSG00000090132	188942	EMPTY	EMPTY	1	15	9.4	blue	38.4	0.0596	EMPTY	EMPTY	EMPTY	EMPTY	EMPTY	EMPTY	EMPTY	FALSE	FALSE	FALSE	FALSE	FALSE	FALSE
NONCO11325	chrX:106281283-106284736	5.4	ENSMUSG00000073012	25908	ENSMUSG00000033737	135306	EMPTY	EMPTY	FALSE	NONCO11325	chrX:106281283-106284736	5.4	ENSMUSG00000073012	25908	ENSMUSG00000033737	135306	EMPTY	EMPTY	1	9	5.4	greenyellow	2.7	0.6645	EMPTY	1	0.14	7.02	0.19	5.14	EMPTY	FALSE	FALSE	FALSE	TRUE	FALSE	FALSE
NONCO11327	chrX:107764094-107764675	3	ENSMUSG00000031241	75117	ENSMUSG00000031242	18077	EMPTY	EMPTY	FALSE	NONCO11327	chrX:107764094-107764675	3	ENSMUSG00000031241	75117	ENSMUSG00000031242	18077	EMPTY	EMPTY	0.3159	4	10.6	brown	15.2	0.206	EMPTY	EMPTY	EMPTY	EMPTY	EMPTY	EMPTY	EMPTY	FALSE	FALSE	FALSE	FALSE	FALSE	FALSE
NONCO11336	chrX:114591122-114592563	44.9	ENSMUSG00000025597	30294	ENSMUSG00000050435	312450	EMPTY	EMPTY	FALSE	NONCO11336	chrX:114591122-114592563	44.9	ENSMUSG00000025597	30294	ENSMUSG00000050435	312450	EMPTY	EMPTY	0.3159	2	2	salmon4	171.7	0.0339	EMPTY	0.6	0.36	1.66	0.13	4.51	Gm1866	FALSE	FALSE	FALSE	FALSE	TRUE	FALSE
NONCO11338	chrX:114980917-114991278	359.9	ENSMUSG00000047079	72408	ENSMUSG00000072995	1457667	EMPTY	EMPTY	FALSE	NONCO11338	chrX:114980917-114991278	359.9	ENSMUSG00000047079	72408	ENSMUSG00000072995	1457667	EMPTY	EMPTY	0.114	9	2	midnightblue	546.5	0	EMPTY	0.74	0.09	8.03	0.19	3.83	Gm7429	FALSE	FALSE	FALSE	TRUE	TRUE	FALSE
NONCO11339	chrX:115013900-115015383	3.9	ENSMUSG00000047079	105391	ENSMUSG00000072995	1433562	EMPTY	EMPTY	FALSE	NONCO11339	chrX:115013900-115015383	3.9	ENSMUSG00000047079	105391	ENSMUSG00000072995	1433562	EMPTY	EMPTY	0.114	17	19.4	darkgreen	54.9	0	EMPTY	0.51	0.09	5.5	0.25	2.06	EMPTY	FALSE	FALSE	FALSE	FALSE	FALSE	FALSE
NONCO11340	chrX:115301785-115304135	0.3	ENSMUSG00000047079	393276	ENSMUSG00000072995	1144810	EMPTY	EMPTY	FALSE	NONCO11340	chrX:115301785-115304135	0.3	ENSMUSG00000047079	393276	ENSMUSG00000072995	1144810	EMPTY	EMPTY	1	13	125520	turquoise	3.6	0.0207	EMPTY	0.16	0.33	0.48	0.19	0.83	EMPTY	FALSE	FALSE	FALSE	FALSE	FALSE	FALSE
NONCO11356	chrX:129619713-129664032	0.6	ENSMUSG00000043569	1883160	ENSMUSG00000034480	85711	EMPTY	EMPTY	FALSE	NONCO11356	chrX:129619713-129664032	0.6	ENSMUSG00000043569	1883160	ENSMUSG00000034480	85711	EMPTY	EMPTY	0.0122	8	8.8	brown	4.7	0.0848	EMPTY	0.7	0.26	2.64	0.35	1.98	EMPTY	FALSE	FALSE	FALSE	FALSE	FALSE	FALSE
NONCO11374	chrX:135915383-135982576	0.6	ENSMUSG00000072964	24303	ENSMUSG00000048040	11249	-0.24	-0.1	FALSE	NONCO11374	chrX:135915383-135982576	0.6	ENSMUSG00000072964	24303	ENSMUSG00000048040	11249	-0.24	-0.1	1	15	3	greenyellow	1.6	NA	EMPTY	0.51	0.01	39.73	0.01	74.41	EMPTY	FALSE	FALSE	FALSE	FALSE	FALSE	FALSE
NONCO11376	chrX:136105771-136115691	1.4	ENSMUSG00000057000	20517	ENSMUSG00000047844	23306	-0.12	0.46	FALSE	NONCO11376	chrX:136105771-136115691	1.4	ENSMUSG00000057000	20517	ENSMUSG00000047844	23306	-0.12	0.46	0.1817	4	23.9	brown	16.5	0.0448	EMPTY	0.21	0	692.69	0.12	1.8	5730412P04Rik	FALSE	FALSE	FALSE	FALSE	FALSE	FALSE
NONCO11401	chrX:141869317-141870204	1.3	ENSMUSG00000054667	144055	ENSMUSG00000081607	3206	0.7	-0.17	FALSE	NONCO11401	chrX:141869317-141870204	1.3	ENSMUSG00000054667	144055	ENSMUSG00000081607	3206	0.7	-0.17	1	9	39330.6	brown	1.1	NA	EMPTY	1	0.1	9.81	0.26	3.86	EMPTY	FALSE	FALSE	FALSE	FALSE	FALSE	FALSE
NONCO11409	chrX:144153695-144166274	0.8	ENSMUSG00000031285	220385	ENSMUSG00000041718	151539	0.42	0.1	FALSE	NONCO11409	chrX:144153695-144166274	0.8	ENSMUSG00000031285	220385	ENSMUSG00000041718	151539	0.42	0.1	0.2696	4	12.7	salmon4	38.3	0.1688	EMPTY	0.41	0.07	6.14	0.02	18.96	A730046J19Rik	TRUE	FALSE	TRUE	TRUE	FALSE	FALSE
NONCO11410	chrX:144285373-144287271	1.1	ENSMUSG00000031285	352063	ENSMUSG00000041718	30542	-0.01	0.58	FALSE	NONCO11410	chrX:144285373-144287271	1.1	ENSMUSG00000031285	352063	ENSMUSG00000041718	30542	-0.01	0.58	0.8745	14	32494.2	brown	1.2	NA	EMPTY	0.98	0.07	15.05	0.21	4.68	EMPTY	FALSE	FALSE	FALSE	FALSE	FALSE	FALSE
NONCO11414	chrX:145601699-145602353	820.8	ENSMUSG00000041688	96519	ENSMUSG00000041380	1360161	-0.35	0.24	FALSE	NONCO11414	chrX:145601699-145602353	820.8	ENSMUSG00000041688	96519	ENSMUSG00000041380	1360161	-0.35	0.24	0.1619	4	2.3	midnightblue	2070.3	0	EMPTY	0.95	0.02	56.66	0.09	10.71	Gm5644	FALSE	FALSE	FALSE	TRUE	TRUE	FALSE
NONCO11422	chrX:151169700-151171764	1.2	ENSMUSG00000025264	73158	ENSMUSG00000041245	26315	-0.47	-0.03	TRUE	NONCO11422	chrX:151169700-151171764	1.2	ENSMUSG00000025264	73158	ENSMUSG00000041245	26315	-0.47	-0.03	0.0122	8	4.9	midnightblue	19.6	0.0036	EMPTY	0.62	0.01	81.67	0.11	5.44	Gm15138	TRUE	FALSE	FALSE	TRUE	FALSE	FALSE
NONCO11429	chrX:152294824-152300575	58.2	ENSMUSG00000025332	20290	ENSMUSG00000041096	36278	0.06	0.53	FALSE	NONCO11429	chrX:152294824-152300575	58.2	ENSMUSG00000025332	20290	ENSMUSG00000041096	36278	0.06	0.53	0.129	6	18.8	midnightblue	1.6	NA	EMPTY	EMPTY	EMPTY	EMPTY	EMPTY	EMPTY	RP23-330G24.3	FALSE	FALSE	FALSE	TRUE	FALSE	FALSE
NONCO11430	chrX:152319472-152327470	2.7	ENSMUSG00000025332	44938	ENSMUSG00000041096	9383	0.02	-0.25	FALSE	NONCO11430	chrX:152319472-152327470	2.7	ENSMUSG00000025332	44938	ENSMUSG00000041096	9383	0.02	-0.25	1	15	3.6	violet	82.2	0.4145	EMPTY	0.15	0.14	1.04	0.3	0.49	Kantr	FALSE	FALSE	FALSE	TRUE	FALSE	FALSE
NONCO11438	chrX:153722953-153741199	497.1	ENSMUSG00000041633	26563	ENSMUSG00000046550	91027	EMPTY	EMPTY	FALSE	NONCO11438	chrX:153722953-153741199	497.1	ENSMUSG00000041633	26563	ENSMUSG00000046550	91027	EMPTY	EMPTY	0.0795	2	2.3	salmon4	3854.7	0	ENSG00000224758	0.94	0.13	7.07	0.07	12.93	2210013O21Rik	TRUE	TRUE	FALSE	TRUE	FALSE	FALSE
NONCO11441	chrX:155390853-155392523	0.9	ENSMUSG00000025289	50100	ENSMUSG00000041552	180933	0.09	0.58	FALSE	NONCO11441	chrX:155390853-155392523	0.9	ENSMUSG00000025289	50100	ENSMUSG00000041552	180933	0.09	0.58	1	17	48013	salmon4	2	0.3593	EMPTY	0.37	0.14	2.57	0.06	6.01	EMPTY	FALSE	FALSE	FALSE	FALSE	FALSE	FALSE
NONCO11446	chrX:157015890-157017545	0.6	ENSMUSG00000055109	670004	ENSMUSG00000057457	144531	0.23	-0.19	TRUE	NONCO11446	chrX:157015890-157017545	0.6	ENSMUSG00000055109	670004	ENSMUSG00000057457	144531	0.23	-0.19	0.0149	10	90221.5	midnightblue	3.7	0.0117	EMPTY	0.78	0	1597.84	0.11	7.07	Gm15163	FALSE	FALSE	FALSE	TRUE	TRUE	FALSE
NONCO11455	chrX:158741260-158743698	0.3	ENSMUSG00000025658	697967	ENSMUSG00000031309	466610	0.08	0.03	FALSE	NONCO11455	chrX:158741260-158743698	0.3	ENSMUSG00000025658	697967	ENSMUSG00000031309	466610	0.08	0.03	1	20	117329	sienna3	4.1	NA	EMPTY	EMPTY	EMPTY	EMPTY	EMPTY	EMPTY	EMPTY	FALSE	FALSE	FALSE	FALSE	FALSE	FALSE
NONCO1146	chr1:72247545-72248438	0.5	ENSMUSG00000039395	35239	ENSMUSG00000026189	10730	-0.32	0.02	FALSE	NONCO1146	chr1:72247545-72248438	0.5	ENSMUSG00000039395	35239	ENSMUSG00000026189	10730	-0.32	0.02	1	15	31.2	darkorange	6.5	0.3711	EMPTY	EMPTY	EMPTY	EMPTY	EMPTY	EMPTY	EMPTY	FALSE	FALSE	FALSE	FALSE	FALSE	FALSE
NONCO11463	chrX:160605003-160605568	0.7	ENSMUSG00000031295	6126	ENSMUSG00000062168	17527	-0.44	0.19	FALSE	NONCO11463	chrX:160605003-160605568	0.7	ENSMUSG00000031295	6126	ENSMUSG00000062168	17527	-0.44	0.19	0.1817	10	37.2	midnightblue	4.8	0.2889	EMPTY	0	0.16	0.03	0.19	0.02	EMPTY	FALSE	FALSE	FALSE	FALSE	FALSE	FALSE
NONCO11470	chrX:162184301-162361288	0.4	ENSMUSG00000059493	24572	ENSMUSG00000040855	50667	0.48	-0.2	FALSE	NONCO11470	chrX:162184301-162361288	0.4	ENSMUSG00000059493	24572	ENSMUSG00000040855	50667	0.48	-0.2	0.8278	10	22	white	2.9	0.4707	ENSG00000230834	0.01	0.24	0.06	0.35	0.04	EMPTY	FALSE	FALSE	FALSE	FALSE	FALSE	FALSE
NONCO11483	chrX:165109229-165116030	6.8	ENSMUSG00000079600	104401	ENSMUSG00000018589	12988	EMPTY	EMPTY	FALSE	NONCO11483	chrX:165109229-165116030	6.8	ENSMUSG00000079600	104401	ENSMUSG00000018589	12988	EMPTY	EMPTY	0.1817	14	33.7	blue	11.7	0.0004	EMPTY	0.33	0.14	2.31	0.38	0.87	EMPTY	FALSE	FALSE	FALSE	FALSE	FALSE	FALSE
NONCO11495	chrX:5984295-5986708	49.6	ENSMUSG00000095814	313270	ENSMUSG00000073295	60746	EMPTY	EMPTY	FALSE	NONCO11495	chrX:5984295-5986708	49.6	ENSMUSG00000095814	313270	ENSMUSG00000073295	60746	EMPTY	EMPTY	1	9	3.6	midnightblue	27.2	0.0354	ENSG00000248844	0.78	0.18	4.44	0.13	6.21	Gm14450	FALSE	FALSE	FALSE	TRUE	TRUE	FALSE
NONCO11497	chrX:6068157-6071828	3.4	ENSMUSG00000073295	13048	ENSMUSG00000073294	9392	EMPTY	EMPTY	FALSE	NONCO11497	chrX:6068157-6071828	3.4	ENSMUSG00000073295	13048	ENSMUSG00000073294	9392	EMPTY	EMPTY	0.3708	8	6.4	brown	0.9	NA	ENSG00000248844	0.95	0.14	6.68	0.39	2.46	Rpl19-ps12	FALSE	FALSE	FALSE	FALSE	TRUE	FALSE
NONCO11500	chrX:7411817-7445143	433.6	ENSMUSG00000046269	35988	ENSMUSG00000039556	112154	0.37	-0.5	FALSE	NONCO11500	chrX:7411817-7445143	433.6	ENSMUSG00000046269	35988	ENSMUSG00000039556	112154	0.37	-0.5	0.114	4	4.4	salmon4	664.6	0	EMPTY	0.45	0.01	64.1	0.35	1.3	2010204K13Rik	TRUE	FALSE	TRUE	TRUE	FALSE	FALSE
NONCO11507	chrX:7752077-7752819	0.1	ENSMUSG00000031150	1173	ENSMUSG00000000134	9742	-0.32	0.22	FALSE	NONCO11507	chrX:7752077-7752819	0.1	ENSMUSG00000031150	1173	ENSMUSG00000000134	9742	-0.32	0.22	1	9	18635.5	greenyellow	1	NA	EMPTY	0.99	0.53	1.87	0.36	2.71	Smt3h2-ps	FALSE	FALSE	FALSE	FALSE	FALSE	FALSE
NONCO11512	chrX:8037253-8047428	27.1	ENSMUSG00000031163	18762	ENSMUSG00000039231	13744	0.39	-0.64	FALSE	NONCO11512	chrX:8037253-8047428	27.1	ENSMUSG00000031163	18762	ENSMUSG00000039231	13744	0.39	-0.64	0.1619	9	3.9	midnightblue	35.1	0.0002	ENSG00000275210	0.81	0.23	3.55	0.06	13.06	Gm7079	FALSE	FALSE	FALSE	FALSE	TRUE	FALSE
NONCO11527	chrX:11769789-11798634	0.7	ENSMUSG00000069038	441639	ENSMUSG00000040363	238107	EMPTY	EMPTY	FALSE	NONCO11527	chrX:11769789-11798634	0.7	ENSMUSG00000069038	441639	ENSMUSG00000040363	238107	EMPTY	EMPTY	1	11	178830	turquoise	6	0.236	EMPTY	0.15	0	41.55	0.62	0.24	EMPTY	FALSE	FALSE	FALSE	FALSE	FALSE	FALSE
NONCO1153	chr1:72942788-72949067	0.3	ENSMUSG00000026185	67905	ENSMUSG00000026182	66008	EMPTY	EMPTY	FALSE	NONCO1153	chr1:72942788-72949067	0.3	ENSMUSG00000026185	67905	ENSMUSG00000026182	66008	EMPTY	EMPTY	1	0	3.8	turquoise	6.5	0.889	EMPTY	0.03	0	24.81	0.12	0.24	EMPTY	FALSE	FALSE	FALSE	FALSE	FALSE	FALSE
NONCO11530	chrX:12246039-12285904	0.2	ENSMUSG00000040363	85685	ENSMUSG00000031007	301898	0.33	-0.56	FALSE	NONCO11530	chrX:12246039-12285904	0.2	ENSMUSG00000040363	85685	ENSMUSG00000031007	301898	0.33	-0.56	0.114	9	9.1	midnightblue	1.2	NA	EMPTY	0.05	0.09	0.52	0.34	0.14	EMPTY	FALSE	FALSE	FALSE	FALSE	FALSE	FALSE
NONCO11534	chrX:12891992-12912334	1.1	ENSMUSG00000064127	129920	ENSMUSG00000031010	159165	-0.02	-0.26	TRUE	NONCO11534	chrX:12891992-12912334	1.1	ENSMUSG00000064127	129920	ENSMUSG00000031010	159165	-0.02	-0.26	0.0259	6	12.3	midnightblue	15.9	0.0226	EMPTY	0.11	0.22	0.47	0.46	0.23	EMPTY	FALSE	FALSE	FALSE	FALSE	FALSE	FALSE
NONCO11535	chrX:12836900-12839034	0.1	ENSMUSG00000064127	74828	ENSMUSG00000031010	232465	-0.1	0.24	FALSE	NONCO11535	chrX:12836900-12839034	0.1	ENSMUSG00000064127	74828	ENSMUSG00000031010	232465	-0.1	0.24	0.4726	17	18.9	saddlebrown	3.5	0.2033	EMPTY	0.26	0.94	0.28	0.14	1.94	EMPTY	FALSE	FALSE	FALSE	FALSE	FALSE	FALSE
NONCO11536	chrX:12888234-12891595	2	ENSMUSG00000064127	126162	ENSMUSG00000031010	179904	0.18	-0.23	TRUE	NONCO11536	chrX:12888234-12891595	2	ENSMUSG00000064127	126162	ENSMUSG00000031010	179904	0.18	-0.23	0.0057	6	6.1	midnightblue	31.4	0.0009	EMPTY	0.07	0.59	0.12	0.07	0.92	EMPTY	FALSE	FALSE	FALSE	TRUE	FALSE	FALSE
NONCO11537	chrX:12937094-12938541	7.7	ENSMUSG00000064127	175022	ENSMUSG00000031010	132958	-0.07	-0.64	FALSE	NONCO11537	chrX:12937094-12938541	7.7	ENSMUSG00000064127	175022	ENSMUSG00000031010	132958	-0.07	-0.64	0.8745	8	3.2	midnightblue	64.3	0.003	EMPTY	0.84	0	Inf	0.44	1.91	AA414768	FALSE	FALSE	FALSE	TRUE	TRUE	FALSE
NONCO1154	chr1:73045995-73053834	0.6	ENSMUSG00000026182	30087	ENSMUSG00000055322	856398	EMPTY	EMPTY	FALSE	NONCO1154	chr1:73045995-73053834	0.6	ENSMUSG00000026182	30087	ENSMUSG00000055322	856398	EMPTY	EMPTY	1	11	14.7	greenyellow	4.2	0.872	EMPTY	0.03	0	6.87	0.28	0.1	EMPTY	FALSE	FALSE	FALSE	FALSE	FALSE	FALSE
NONCO11540	chrX:13202540-13203833	1762.3	ENSMUSG00000031010	29213	ENSMUSG00000000787	77138	0.66	-0.31	TRUE	NONCO11540	chrX:13202540-13203833	1762.3	ENSMUSG00000031010	29213	ENSMUSG00000000787	77138	0.66	-0.31	0.031	20	2.4	turquoise	1462.5	0	EMPTY	0.14	0.69	0.2	0.08	1.75	Rpl3-ps1	FALSE	FALSE	FALSE	TRUE	TRUE	FALSE
NONCO11541	chrX:13234788-13236243	0.8	ENSMUSG00000031010	61461	ENSMUSG00000000787	44728	-0.2	0.25	FALSE	NONCO11541	chrX:13234788-13236243	0.8	ENSMUSG00000031010	61461	ENSMUSG00000000787	44728	-0.2	0.25	1	7	5.4	greenyellow	7.4	0.8655	EMPTY	0.07	0.44	0.16	0.9	0.08	2010308F09Rik	FALSE	FALSE	FALSE	FALSE	TRUE	FALSE
NONCO11543	chrX:13303891-13304536	17.9	ENSMUSG00000000787	9840	ENSMUSG00000051228	161575	0.37	-0.32	TRUE	NONCO11543	chrX:13303891-13304536	17.9	ENSMUSG00000000787	9840	ENSMUSG00000051228	161575	0.37	-0.32	0.018	8	41.5	midnightblue	4.2	0.0032	EMPTY	0.99	0.02	53.25	0.11	9.33	EMPTY	FALSE	FALSE	FALSE	FALSE	FALSE	FALSE
NONCO1155	chr1:73615948-73826405	3.4	ENSMUSG00000026182	600040	ENSMUSG00000055322	83827	EMPTY	EMPTY	FALSE	NONCO1155	chr1:73615948-73826405	3.4	ENSMUSG00000026182	600040	ENSMUSG00000055322	83827	EMPTY	EMPTY	0.3708	0	2.9	salmon4	20.9	0.6398	EMPTY	0.21	0.02	10.77	0.05	4.03	6030407O03Rik,Gm29183	FALSE	FALSE	FALSE	TRUE	FALSE	FALSE
NONCO11551	chrX:17530810-17534081	0.3	ENSMUSG00000025038	211443	ENSMUSG00000025040	22484	-0.05	-0.24	FALSE	NONCO11551	chrX:17530810-17534081	0.3	ENSMUSG00000025038	211443	ENSMUSG00000025040	22484	-0.05	-0.24	1	11	8.2	lightyellow	5.1	0.7959	ENSG00000267224	EMPTY	EMPTY	EMPTY	EMPTY	EMPTY	EMPTY	FALSE	FALSE	FALSE	FALSE	FALSE	FALSE
NONCO11555	chrX:19145366-19237922	7.9	ENSMUSG00000037358	683970	ENSMUSG00000068149	241499	EMPTY	EMPTY	FALSE	NONCO11555	chrX:19145366-19237922	7.9	ENSMUSG00000037358	683970	ENSMUSG00000068149	241499	EMPTY	EMPTY	0.6669	22	3.4	blue	78.9	0.2166	ENSG00000268568	0.16	0.14	1.16	0.57	0.29	Gm14636,Gm26652	TRUE	TRUE	TRUE	TRUE	FALSE	FALSE
NONCO11567	chrX:21280848-21334812	0.3	ENSMUSG00000095316	105196	ENSMUSG00000068122	149733	EMPTY	EMPTY	FALSE	NONCO11567	chrX:21280848-21334812	0.3	ENSMUSG00000095316	105196	ENSMUSG00000068122	149733	EMPTY	EMPTY	1	11	137343	brown4	3.4	0.3317	EMPTY	0.04	0.58	0.07	0.16	0.26	Gm6938	TRUE	FALSE	FALSE	TRUE	FALSE	FALSE
NONCO11568	chrX:21360199-21364629	6.8	ENSMUSG00000095316	184547	ENSMUSG00000068122	119916	EMPTY	EMPTY	FALSE	NONCO11568	chrX:21360199-21364629	6.8	ENSMUSG00000095316	184547	ENSMUSG00000068122	119916	EMPTY	EMPTY	1	5	2.1	blue	52.4	0.8444	EMPTY	0.2	0	115.14	0.19	1.04	Gm26593,Gm5124	FALSE	FALSE	TRUE	TRUE	TRUE	FALSE
NONCO11574	chrX:26414807-26415313	6.6	ENSMUSG00000083628	104764	ENSMUSG00000095063	107344	EMPTY	EMPTY	FALSE	NONCO11574	chrX:26414807-26415313	6.6	ENSMUSG00000083628	104764	ENSMUSG00000095063	107344	EMPTY	EMPTY	0.0377	8	2.1	midnightblue	26	0.085	EMPTY	0.33	0.14	2.29	0.19	1.68	EMPTY	FALSE	FALSE	FALSE	TRUE	TRUE	FALSE
NONCO11579	chrX:33505663-33509241	6.6	ENSMUSG00000095264	105540	ENSMUSG00000101294	66158	EMPTY	EMPTY	TRUE	NONCO11579	chrX:33505663-33509241	6.6	ENSMUSG00000095264	105540	ENSMUSG00000101294	66158	EMPTY	EMPTY	0.018	21	18	turquoise	32.2	0	ENSG00000268392	0.02	0.14	0.17	0.05	0.53	Gm2223	FALSE	FALSE	FALSE	TRUE	TRUE	FALSE
NONCO11580	chrX:33843757-33845283	1.4	ENSMUSG00000078324	141409	ENSMUSG00000096915	109762	EMPTY	EMPTY	FALSE	NONCO11580	chrX:33843757-33845283	1.4	ENSMUSG00000078324	141409	ENSMUSG00000096915	109762	EMPTY	EMPTY	0.5782	22	2.7	turquoise	8.7	0.5681	ENSG00000268392	EMPTY	EMPTY	EMPTY	EMPTY	EMPTY	EMPTY	FALSE	FALSE	FALSE	FALSE	FALSE	FALSE
NONCO11594	chrX:38180117-38182247	13.5	ENSMUSG00000050197	50151	ENSMUSG00000048047	7547	EMPTY	EMPTY	FALSE	NONCO11594	chrX:38180117-38182247	13.5	ENSMUSG00000050197	50151	ENSMUSG00000048047	7547	EMPTY	EMPTY	0.1619	2	2	brown	98.3	0.1734	ENSG00000268307	1	0.02	52.88	0.19	5.15	Zfp36l1-ps	FALSE	FALSE	TRUE	TRUE	FALSE	TRUE
NONCO11596	chrX:38505104-38505977	3.8	ENSMUSG00000016534	48651	ENSMUSG00000031095	27298	-0.46	-0.35	FALSE	NONCO11596	chrX:38505104-38505977	3.8	ENSMUSG00000016534	48651	ENSMUSG00000031095	27298	-0.46	-0.35	0.0795	8	6.6	midnightblue	12.4	0.0327	EMPTY	0.64	0.51	1.25	0.19	3.3	EMPTY	FALSE	FALSE	FALSE	FALSE	TRUE	FALSE
NONCO11598	chrX:38657049-38737762	0.1	ENSMUSG00000048970	21963	ENSMUSG00000051361	34910	0.48	0.54	FALSE	NONCO11598	chrX:38657049-38737762	0.1	ENSMUSG00000048970	21963	ENSMUSG00000051361	34910	0.48	0.54	1	9	61910.8	darkred	1.5	NA	EMPTY	0.09	0.12	0.69	0.14	0.61	Gm14565	TRUE	FALSE	FALSE	FALSE	FALSE	TRUE
NONCO11618	chrX:49657137-49661603	61.5	ENSMUSG00000036198	156894	ENSMUSG00000071764	21902	EMPTY	EMPTY	TRUE	NONCO11618	chrX:49657137-49661603	61.5	ENSMUSG00000036198	156894	ENSMUSG00000071764	21902	EMPTY	EMPTY	0.0455	9	16.9	midnightblue	205.9	0	EMPTY	EMPTY	EMPTY	EMPTY	EMPTY	EMPTY	Gm14719	FALSE	FALSE	FALSE	TRUE	FALSE	FALSE
NONCO11620	chrX:50555744-50635323	12.3	ENSMUSG00000048173	129251	ENSMUSG00000031112	205725	EMPTY	EMPTY	FALSE	NONCO11620	chrX:50555744-50635323	12.3	ENSMUSG00000048173	129251	ENSMUSG00000031112	205725	EMPTY	EMPTY	1	15	2.5	blue	186.1	0.3502	EMPTY	0	0.13	0.02	0.09	0.03	Firre	TRUE	TRUE	FALSE	TRUE	FALSE	FALSE
NONCO11627	chrX:53055046-53057190	0.4	ENSMUSG00000025630	33388	ENSMUSG00000061082	12806	EMPTY	EMPTY	FALSE	NONCO11627	chrX:53055046-53057190	0.4	ENSMUSG00000025630	33388	ENSMUSG00000061082	12806	EMPTY	EMPTY	1	15	87634.7	darkred	4.4	0.6293	EMPTY	0.09	0.1	0.91	0.38	0.23	C430049B03Rik	TRUE	FALSE	TRUE	TRUE	FALSE	FALSE
NONCO11630	chrX:53695865-53716710	6.9	ENSMUSG00000067924	25458	ENSMUSG00000055555	8117	0.28	0.03	FALSE	NONCO11630	chrX:53695865-53716710	6.9	ENSMUSG00000067924	25458	ENSMUSG00000055555	8117	0.28	0.03	1	9	9.7	blue	71.5	0.0053	EMPTY	0.37	0	959.91	0.19	1.92	AW822252	TRUE	TRUE	FALSE	TRUE	FALSE	FALSE
NONCO11631	chrX:53707991-53710388	0.5	ENSMUSG00000067924	37584	ENSMUSG00000055555	14439	-0.15	-0.16	FALSE	NONCO11631	chrX:53707991-53710388	0.5	ENSMUSG00000067924	37584	ENSMUSG00000055555	14439	-0.15	-0.16	1	15	2.7	darkorange	7.2	0.9906	ENSG00000246985	0.02	0	61.01	0.14	0.17	EMPTY	FALSE	FALSE	FALSE	FALSE	FALSE	FALSE
NONCO11641	chrX:57792194-57795431	0.4	ENSMUSG00000036357	288438	ENSMUSG00000067860	227270	0.13	0.45	FALSE	NONCO11641	chrX:57792194-57795431	0.4	ENSMUSG00000036357	288438	ENSMUSG00000067860	227270	0.13	0.45	1	15	16.9	ivory	6.8	0.7393	EMPTY	0.21	0.13	1.62	0.07	2.91	EMPTY	FALSE	FALSE	FALSE	FALSE	FALSE	FALSE
NONCO11645	chrX:60683919-60853022	0.5	ENSMUSG00000062949	91222	ENSMUSG00000045179	38345	0.39	0.05	FALSE	NONCO11645	chrX:60683919-60853022	0.5	ENSMUSG00000062949	91222	ENSMUSG00000045179	38345	0.39	0.05	1	13	141934	midnightblue	4.3	0.2344	EMPTY	0	0.03	0.02	0.54	0	EMPTY	FALSE	FALSE	FALSE	FALSE	FALSE	FALSE
NONCO11646	chrX:60849962-60850556	1.7	ENSMUSG00000062949	257265	ENSMUSG00000045179	40811	-0.13	-0.1	FALSE	NONCO11646	chrX:60849962-60850556	1.7	ENSMUSG00000062949	257265	ENSMUSG00000045179	40811	-0.13	-0.1	1	13	79980	brown4	2.9	0.6918	EMPTY	0.01	0.03	0.46	0.04	0.41	EMPTY	FALSE	FALSE	FALSE	FALSE	FALSE	FALSE
NONCO11648	chrX:60911670-60917656	1.9	ENSMUSG00000045179	18241	ENSMUSG00000090546	265591	-0.49	-0.01	FALSE	NONCO11648	chrX:60911670-60917656	1.9	ENSMUSG00000045179	18241	ENSMUSG00000090546	265591	-0.49	-0.01	0.0759	22	16.4	turquoise	27.1	0.0448	EMPTY	0.02	0.06	0.3	0.04	0.41	EMPTY	FALSE	FALSE	FALSE	FALSE	FALSE	FALSE
NONCO11651	chrX:61785360-61787033	123.6	ENSMUSG00000057615	74406	ENSMUSG00000045330	496467	EMPTY	EMPTY	TRUE	NONCO11651	chrX:61785360-61787033	123.6	ENSMUSG00000057615	74406	ENSMUSG00000045330	496467	EMPTY	EMPTY	0.031	22	2.2	turquoise	384.5	0	EMPTY	0.96	0.03	29.56	0.16	6.1	Gm7327	FALSE	FALSE	FALSE	TRUE	TRUE	FALSE
NONCO11653	chrX:64496940-64498938	34	ENSMUSG00000046699	219945	ENSMUSG00000031181	548707	EMPTY	EMPTY	FALSE	NONCO11653	chrX:64496940-64498938	34	ENSMUSG00000046699	219945	ENSMUSG00000031181	548707	EMPTY	EMPTY	0.031	22	2.5	turquoise	165.7	0.0618	EMPTY	EMPTY	EMPTY	EMPTY	EMPTY	EMPTY	EMPTY	FALSE	FALSE	FALSE	TRUE	TRUE	FALSE
NONCO11667	chrX:71505035-71520299	0.4	ENSMUSG00000035776	12187	ENSMUSG00000015217	35620	-0.24	0.62	FALSE	NONCO11667	chrX:71505035-71520299	0.4	ENSMUSG00000035776	12187	ENSMUSG00000015217	35620	-0.24	0.62	0.5782	6	32.4	brown	2.3	0.2226	EMPTY	EMPTY	EMPTY	EMPTY	EMPTY	EMPTY	EMPTY	FALSE	FALSE	FALSE	FALSE	FALSE	FALSE
NONCO11673	chrX:72904048-72905504	0.4	ENSMUSG00000031344	61447	ENSMUSG00000031347	8029	0.04	0.25	FALSE	NONCO11673	chrX:72904048-72905504	0.4	ENSMUSG00000031344	61447	ENSMUSG00000031347	8029	0.04	0.25	1	0	74092	lightyellow	2.3	0.176	EMPTY	0.16	0	31.8	0.21	0.75	EMPTY	FALSE	FALSE	FALSE	FALSE	FALSE	FALSE
NONCO11678	chrX:73318226-73333939	11.7	ENSMUSG00000058328	25251	ENSMUSG00000031365	8683	EMPTY	EMPTY	FALSE	NONCO11678	chrX:73318226-73333939	11.7	ENSMUSG00000058328	25251	ENSMUSG00000031365	8683	EMPTY	EMPTY	1	9	2.9	blue	109.1	0.063	EMPTY	0.01	0.01	1.56	0.2	0.07	EMPTY	FALSE	FALSE	FALSE	FALSE	FALSE	TRUE
NONCO11696	chrX:74873054-74880222	0.2	ENSMUSG00000079531	29700	ENSMUSG00000032750	86622	-0.28	0	FALSE	NONCO11696	chrX:74873054-74880222	0.2	ENSMUSG00000079531	29700	ENSMUSG00000032750	86622	-0.28	0	0.4726	0	8.2	darkmagenta	2.8	0.6999	EMPTY	EMPTY	EMPTY	EMPTY	EMPTY	EMPTY	EMPTY	FALSE	FALSE	FALSE	FALSE	FALSE	TRUE
NONCO11700	chrX:75615916-75616536	0.2	ENSMUSG00000031202	37686	ENSMUSG00000016382	169119	0.25	0.05	FALSE	NONCO11700	chrX:75615916-75616536	0.2	ENSMUSG00000031202	37686	ENSMUSG00000016382	169119	0.25	0.05	0.2287	18	82607.3	blue	2.7	0.2772	EMPTY	0.28	0.1	2.72	0.19	1.46	EMPTY	FALSE	FALSE	FALSE	FALSE	FALSE	FALSE
NONCO11703	chrX:75706556-75764906	2.5	ENSMUSG00000031202	128326	ENSMUSG00000016382	20749	-0.45	0.54	FALSE	NONCO11703	chrX:75706556-75764906	2.5	ENSMUSG00000031202	128326	ENSMUSG00000016382	20749	-0.45	0.54	0.4325	22	3	turquoise	64.6	0.2541	EMPTY	0.06	0.72	0.09	0.19	0.32	4933407K13Rik	TRUE	TRUE	TRUE	TRUE	FALSE	FALSE
NONCO11707	chrX:76798163-76800483	0.4	ENSMUSG00000079525	195240	ENSMUSG00000025246	710531	EMPTY	EMPTY	FALSE	NONCO11707	chrX:76798163-76800483	0.4	ENSMUSG00000079525	195240	ENSMUSG00000025246	710531	EMPTY	EMPTY	0.1539	11	39579.4	orange	1.4	NA	EMPTY	0.45	0.14	3.15	0.12	3.72	EMPTY	FALSE	FALSE	FALSE	FALSE	FALSE	TRUE
NONCO11708	chrX:77203449-77433609	0.7	ENSMUSG00000079525	600526	ENSMUSG00000025246	77405	EMPTY	EMPTY	FALSE	NONCO11708	chrX:77203449-77433609	0.7	ENSMUSG00000079525	600526	ENSMUSG00000025246	77405	EMPTY	EMPTY	1	11	7	brown4	4.3	0.9488	EMPTY	0.38	0.32	1.21	0.07	5.86	EMPTY	FALSE	FALSE	FALSE	FALSE	FALSE	FALSE
NONCO11711	chrX:79195016-79207279	395.9	ENSMUSG00000078315	455616	ENSMUSG00000079517	123235	EMPTY	EMPTY	TRUE	NONCO11711	chrX:79195016-79207279	395.9	ENSMUSG00000078315	455616	ENSMUSG00000079517	123235	EMPTY	EMPTY	0.0149	5	9.6	midnightblue	154.5	0	EMPTY	EMPTY	EMPTY	EMPTY	EMPTY	EMPTY	Rps24-ps3	FALSE	FALSE	FALSE	TRUE	FALSE	FALSE
NONCO11714	chrX:79904367-79904838	1.1	ENSMUSG00000046942	232933	ENSMUSG00000025666	1165861	EMPTY	EMPTY	TRUE	NONCO11714	chrX:79904367-79904838	1.1	ENSMUSG00000046942	232933	ENSMUSG00000025666	1165861	EMPTY	EMPTY	0.0366	14	18.7	darkgreen	10.2	0.0033	EMPTY	0.75	0.01	76.58	0.19	3.88	EMPTY	FALSE	FALSE	FALSE	FALSE	TRUE	FALSE
NONCO1175	chr1:76773331-76778033	54.8	ENSMUSG00000006576	1211160	ENSMUSG00000026235	589153	-0.26	-0.17	FALSE	NONCO1175	chr1:76773331-76778033	54.8	ENSMUSG00000006576	1211160	ENSMUSG00000026235	589153	-0.26	-0.17	0.0548	5	10.7	midnightblue	494.2	0	EMPTY	0.21	0.12	1.7	0.03	6.26	EMPTY	FALSE	FALSE	FALSE	FALSE	FALSE	FALSE
NONCO1176	chr1:77743954-77896159	4.5	ENSMUSG00000026235	228867	ENSMUSG00000004872	205109	EMPTY	EMPTY	FALSE	NONCO1176	chr1:77743954-77896159	4.5	ENSMUSG00000026235	228867	ENSMUSG00000004872	205109	EMPTY	EMPTY	1	13	10	violet	9.5	NA	EMPTY	0.48	0	238.7	0.06	8.45	EMPTY	FALSE	FALSE	FALSE	FALSE	FALSE	FALSE
NONCO11763	chrX:101768799-101769275	11.9	ENSMUSG00000050232	34531	ENSMUSG00000046774	25382	EMPTY	EMPTY	FALSE	NONCO11763	chrX:101768799-101769275	11.9	ENSMUSG00000050232	34531	ENSMUSG00000046774	25382	EMPTY	EMPTY	0.0661	8	23.5	brown	11.9	0	EMPTY	0.89	0.19	4.63	0.08	10.92	EMPTY	FALSE	FALSE	FALSE	FALSE	TRUE	FALSE
NONCO11768	chrX:102205791-102208559	16.1	ENSMUSG00000031320	16398	ENSMUSG00000051159	38823	-0.46	0.27	FALSE	NONCO11768	chrX:102205791-102208559	16.1	ENSMUSG00000031320	16398	ENSMUSG00000051159	38823	-0.46	0.27	0.0634	14	21.9	blue	6.7	0.0059	EMPTY	0.94	0.02	56.58	0.25	3.73	Gm14859	FALSE	FALSE	FALSE	FALSE	TRUE	FALSE
NONCO11771	chrX:103013806-103016249	1.7	ENSMUSG00000079476	104156	ENSMUSG00000082229	167928	EMPTY	EMPTY	TRUE	NONCO11771	chrX:103013806-103016249	1.7	ENSMUSG00000079476	104156	ENSMUSG00000082229	167928	EMPTY	EMPTY	0.0214	6	30.4	brown	38.3	0	EMPTY	0.14	0.16	0.89	0.08	1.73	Pabpc1l2b-ps	FALSE	FALSE	FALSE	FALSE	TRUE	FALSE
NONCO11773	chrX:103140790-103141256	1.5	ENSMUSG00000079476	231140	ENSMUSG00000082229	42921	EMPTY	EMPTY	TRUE	NONCO11773	chrX:103140790-103141256	1.5	ENSMUSG00000079476	231140	ENSMUSG00000082229	42921	EMPTY	EMPTY	0.0069	10	82581	midnightblue	2.8	0.0069	EMPTY	0.14	0.47	0.29	0.19	0.71	EMPTY	FALSE	FALSE	FALSE	FALSE	FALSE	FALSE
NONCO11778	chrX:103575425-103581669	0.8	ENSMUSG00000098078	93721	ENSMUSG00000031330	48918	EMPTY	EMPTY	FALSE	NONCO11778	chrX:103575425-103581669	0.8	ENSMUSG00000098078	93721	ENSMUSG00000031330	48918	EMPTY	EMPTY	1	11	2	greenyellow	7.1	0.9686	EMPTY	0.13	0	378.46	0.07	1.73	EMPTY	FALSE	FALSE	FALSE	FALSE	FALSE	FALSE
NONCO11779	chrX:103498820-103499744	1	ENSMUSG00000098078	17116	ENSMUSG00000031330	130843	EMPTY	EMPTY	FALSE	NONCO11779	chrX:103498820-103499744	1	ENSMUSG00000098078	17116	ENSMUSG00000031330	130843	EMPTY	EMPTY	1	7	37.5	brown4	11.3	0.2347	EMPTY	0.14	0.24	0.56	0.08	1.74	EMPTY	FALSE	FALSE	FALSE	FALSE	FALSE	FALSE
NONCO11780	chrX:103503288-103506133	0.4	ENSMUSG00000098078	21584	ENSMUSG00000031330	124454	EMPTY	EMPTY	FALSE	NONCO11780	chrX:103503288-103506133	0.4	ENSMUSG00000098078	21584	ENSMUSG00000031330	124454	EMPTY	EMPTY	0.2156	2	25.7	brown	6	0.271	EMPTY	0.17	0.24	0.7	0.12	1.4	EMPTY	FALSE	FALSE	FALSE	FALSE	FALSE	FALSE
NONCO11786	chrX:105146943-105391875	24.1	ENSMUSG00000031227	23017	ENSMUSG00000090132	107898	EMPTY	EMPTY	FALSE	NONCO11786	chrX:105146943-105391875	24.1	ENSMUSG00000031227	23017	ENSMUSG00000090132	107898	EMPTY	EMPTY	0.4325	0	1.6	violet	389.7	0.6197	EMPTY	0.18	0.15	1.16	0.11	1.58	5330434G04Rik	TRUE	TRUE	FALSE	TRUE	FALSE	TRUE
NONCO11787	chrX:105213072-105213708	0.7	ENSMUSG00000031227	89146	ENSMUSG00000090132	286065	EMPTY	EMPTY	FALSE	NONCO11787	chrX:105213072-105213708	0.7	ENSMUSG00000031227	89146	ENSMUSG00000090132	286065	EMPTY	EMPTY	0.0759	20	113607	paleturquoise	6.5	0.0014	ENSG00000267605	EMPTY	EMPTY	EMPTY	EMPTY	EMPTY	EMPTY	FALSE	FALSE	FALSE	FALSE	FALSE	TRUE
NONCO11788	chrX:105298140-105301133	0.2	ENSMUSG00000031227	174214	ENSMUSG00000090132	198640	EMPTY	EMPTY	FALSE	NONCO11788	chrX:105298140-105301133	0.2	ENSMUSG00000031227	174214	ENSMUSG00000090132	198640	EMPTY	EMPTY	1	15	143556	orange	3.6	0.3729	ENSG00000267605	EMPTY	EMPTY	EMPTY	EMPTY	EMPTY	EMPTY	FALSE	FALSE	FALSE	FALSE	FALSE	FALSE
NONCO1179	chr1:78594917-78609690	1.6	ENSMUSG00000012187	56745	ENSMUSG00000032883	48136	0.31	0.39	FALSE	NONCO1179	chr1:78594917-78609690	1.6	ENSMUSG00000012187	56745	ENSMUSG00000032883	48136	0.31	0.39	0.7666	8	16	white	21.9	0.0441	EMPTY	0	0.59	0	0.06	0.03	5730419F03Rik	FALSE	FALSE	FALSE	FALSE	FALSE	FALSE
NONCO11790	chrX:108888809-108891189	0.2	ENSMUSG00000063663	54438	ENSMUSG00000031245	113346	-0.13	0.46	FALSE	NONCO11790	chrX:108888809-108891189	0.2	ENSMUSG00000063663	54438	ENSMUSG00000031245	113346	-0.13	0.46	1	9	5.6	darkred	3.4	0.8286	EMPTY	0.42	0.01	28.68	0.19	2.17	EMPTY	FALSE	FALSE	FALSE	FALSE	FALSE	FALSE
NONCO11792	chrX:109387484-109388547	1	ENSMUSG00000048621	187046	ENSMUSG00000056854	1425734	EMPTY	EMPTY	FALSE	NONCO11792	chrX:109387484-109388547	1	ENSMUSG00000048621	187046	ENSMUSG00000056854	1425734	EMPTY	EMPTY	0.0443	14	30484.6	darkgreen	1	NA	EMPTY	0.69	0.05	13.88	0.18	3.93	EMPTY	FALSE	FALSE	FALSE	FALSE	FALSE	FALSE
NONCO11793	chrX:110635331-110664723	1	ENSMUSG00000048621	1434893	ENSMUSG00000056854	149558	EMPTY	EMPTY	FALSE	NONCO11793	chrX:110635331-110664723	1	ENSMUSG00000048621	1434893	ENSMUSG00000056854	149558	EMPTY	EMPTY	1	20	160968	blue	4.9	0.3945	ENSG00000276071	EMPTY	EMPTY	EMPTY	EMPTY	EMPTY	EMPTY	FALSE	FALSE	FALSE	FALSE	FALSE	FALSE
NONCO11796	chrX:112162585-112170778	4.5	ENSMUSG00000034555	35260	ENSMUSG00000079460	68272	-0.42	0.65	FALSE	NONCO11796	chrX:112162585-112170778	4.5	ENSMUSG00000034555	35260	ENSMUSG00000079460	68272	-0.42	0.65	0.5013	9	8.9	midnightblue	20.1	0.0044	ENSG00000276071	0.4	1	0.4	0.12	3.3	EMPTY	FALSE	FALSE	FALSE	FALSE	FALSE	FALSE
NONCO11811	chrX:128789062-128789504	0.2	ENSMUSG00000043569	1052509	ENSMUSG00000034480	960239	EMPTY	EMPTY	FALSE	NONCO11811	chrX:128789062-128789504	0.2	ENSMUSG00000043569	1052509	ENSMUSG00000034480	960239	EMPTY	EMPTY	0.2287	14	43313.6	darkgreen	1.3	NA	EMPTY	0.83	0	416.12	0.03	31.77	EMPTY	FALSE	FALSE	FALSE	FALSE	FALSE	FALSE
NONCO1182	chr1:78783027-78784789	2.7	ENSMUSG00000032883	75285	ENSMUSG00000047330	31970	-0.2	0.33	FALSE	NONCO1182	chr1:78783027-78784789	2.7	ENSMUSG00000032883	75285	ENSMUSG00000047330	31970	-0.2	0.33	1	7	1.8	turquoise	11.5	0.9365	EMPTY	0.99	0.27	3.64	0.19	5.11	Gm6159	FALSE	FALSE	FALSE	TRUE	TRUE	FALSE
NONCO11824	chrX:135022734-135060336	2.6	ENSMUSG00000052676	13526	ENSMUSG00000079432	107289	EMPTY	EMPTY	FALSE	NONCO11824	chrX:135022734-135060336	2.6	ENSMUSG00000052676	13526	ENSMUSG00000079432	107289	EMPTY	EMPTY	0.3159	18	2.6	brown	88.7	0.5638	EMPTY	0.57	0	286.8	0.19	2.96	3632454L22Rik	TRUE	FALSE	FALSE	TRUE	FALSE	FALSE
NONCO11844	chrX:140310534-140312246	0.6	ENSMUSG00000042433	203738	ENSMUSG00000042425	55249	EMPTY	EMPTY	FALSE	NONCO11844	chrX:140310534-140312246	0.6	ENSMUSG00000042433	203738	ENSMUSG00000042425	55249	EMPTY	EMPTY	1	13	3.2	brown	12.1	0.9142	ENSG00000278011	0.48	0.1	4.95	0.07	6.45	EMPTY	FALSE	FALSE	FALSE	FALSE	FALSE	FALSE
NONCO11847	chrX:140433563-140435465	38.1	ENSMUSG00000042425	39024	ENSMUSG00000031432	21149	0.52	-0.42	FALSE	NONCO11847	chrX:140433563-140435465	38.1	ENSMUSG00000042425	39024	ENSMUSG00000031432	21149	0.52	-0.42	0.3159	6	2.8	brown	395.5	0.0001	ENSG00000267012	0.58	0.02	38.18	0.13	4.65	EMPTY	FALSE	FALSE	FALSE	TRUE	FALSE	FALSE
NONCO11851	chrX:141900582-141902455	0	ENSMUSG00000081607	25348	ENSMUSG00000042282	178706	0.06	0.62	FALSE	NONCO11851	chrX:141900582-141902455	0	ENSMUSG00000081607	25348	ENSMUSG00000042282	178706	0.06	0.62	1	17	10604.5	sienna3	0.6	NA	EMPTY	EMPTY	EMPTY	EMPTY	EMPTY	EMPTY	Gm15298	TRUE	FALSE	TRUE	FALSE	FALSE	FALSE
NONCO11852	chrX:141980075-141982521	82.9	ENSMUSG00000081607	104841	ENSMUSG00000042282	98640	0.7	0.1	FALSE	NONCO11852	chrX:141980075-141982521	82.9	ENSMUSG00000081607	104841	ENSMUSG00000042282	98640	0.7	0.1	1	13	4.3	darkgreen	18.7	0.0125	ENSG00000267081	0.68	0.09	7.21	0.19	3.5	EMPTY	FALSE	FALSE	FALSE	TRUE	FALSE	FALSE
NONCO11853	chrX:142210474-142221273	30.9	ENSMUSG00000042282	13544	ENSMUSG00000042271	5498	-0.27	-0.62	TRUE	NONCO11853	chrX:142210474-142221273	30.9	ENSMUSG00000042282	13544	ENSMUSG00000042271	5498	-0.27	-0.62	0.031	9	2.4	midnightblue	112.4	0	ENSG00000267081	0.85	0.08	10.63	0.05	15.82	Gm6382	FALSE	FALSE	FALSE	TRUE	TRUE	FALSE
NONCO11859	chrX:144243548-144247528	110.2	ENSMUSG00000031285	310238	ENSMUSG00000041718	70285	-0.18	-0.14	TRUE	NONCO11859	chrX:144243548-144247528	110.2	ENSMUSG00000031285	310238	ENSMUSG00000041718	70285	-0.18	-0.14	0.0455	13	11.4	saddlebrown	152.1	0	EMPTY	EMPTY	EMPTY	EMPTY	EMPTY	EMPTY	EMPTY	FALSE	FALSE	FALSE	FALSE	FALSE	TRUE
NONCO11874	chrX:150501924-150509944	1.2	ENSMUSG00000041353	42771	ENSMUSG00000025269	9576	0	-0.16	FALSE	NONCO11874	chrX:150501924-150509944	1.2	ENSMUSG00000041353	42771	ENSMUSG00000025269	9576	0	-0.16	1	5	2.8	brown4	24.3	0.7463	ENSG00000278011	0.17	0	55.21	0.23	0.72	EMPTY	FALSE	FALSE	FALSE	TRUE	FALSE	FALSE
NONCO11888	chrX:152294824-152327533	55	ENSMUSG00000025332	20290	ENSMUSG00000041096	9320	-0.6	-0.37	FALSE	NONCO11888	chrX:152294824-152327533	55	ENSMUSG00000025332	20290	ENSMUSG00000041096	9320	-0.6	-0.37	0.0661	21	8.1	turquoise	388.6	0	EMPTY	0.03	0.14	0.19	0.26	0.1	Kantr,RP23-330G24.3	TRUE	FALSE	FALSE	TRUE	FALSE	FALSE
NONCO11895	chrX:153721029-153723040	1.8	ENSMUSG00000041633	24639	ENSMUSG00000046550	109186	EMPTY	EMPTY	FALSE	NONCO11895	chrX:153721029-153723040	1.8	ENSMUSG00000041633	24639	ENSMUSG00000046550	109186	EMPTY	EMPTY	1	7	7.5	midnightblue	7.9	0.1365	ENSG00000268318	0.16	0.13	1.23	0.06	2.8	EMPTY	FALSE	FALSE	FALSE	FALSE	FALSE	FALSE
NONCO11896	chrX:153783365-153784775	18.1	ENSMUSG00000041633	86975	ENSMUSG00000046550	47451	EMPTY	EMPTY	FALSE	NONCO11896	chrX:153783365-153784775	18.1	ENSMUSG00000041633	86975	ENSMUSG00000046550	47451	EMPTY	EMPTY	0.0634	9	125956	midnightblue	5.8	0.0002	ENSG00000268318	0.29	0.13	2.17	0.19	1.49	Smt3h1-ps	FALSE	FALSE	FALSE	FALSE	FALSE	FALSE
NONCO11906	chrX:158150351-158151395	5.8	ENSMUSG00000025658	107058	ENSMUSG00000031309	1058913	-0.18	-0.52	TRUE	NONCO11906	chrX:158150351-158151395	5.8	ENSMUSG00000025658	107058	ENSMUSG00000031309	1058913	-0.18	-0.52	0.0259	10	75.9	midnightblue	12.9	0	EMPTY	0.46	0.11	4.15	0.18	2.51	EMPTY	FALSE	FALSE	FALSE	FALSE	FALSE	FALSE
NONCO11926	chrX:162734877-162736686	2.8	ENSMUSG00000040855	91229	ENSMUSG00000031353	23717	0.09	-0.34	FALSE	NONCO11926	chrX:162734877-162736686	2.8	ENSMUSG00000040855	91229	ENSMUSG00000031353	23717	0.09	-0.34	1	11	6.3	darkorange	37	0.2424	EMPTY	0.36	0.15	2.39	0.19	1.85	Gm15201	TRUE	TRUE	TRUE	TRUE	FALSE	FALSE
NONCO1195	chr1:82822240-82822884	5.9	ENSMUSG00000026149	53780	ENSMUSG00000026159	16600	EMPTY	EMPTY	TRUE	NONCO1195	chr1:82822240-82822884	5.9	ENSMUSG00000026149	53780	ENSMUSG00000026159	16600	EMPTY	EMPTY	0.0102	13	7.6	darkgreen	31	0	EMPTY	0.58	0.37	1.56	0.03	21.21	Gm17764	FALSE	FALSE	FALSE	TRUE	TRUE	FALSE
NONCO11951	chrY:1034552-1050212	4.5	ENSMUSG00000069049	5706	ENSMUSG00000068457	46650	0.29	0.31	FALSE	NONCO11951	chrY:1034552-1050212	4.5	ENSMUSG00000069049	5706	ENSMUSG00000068457	46650	0.29	0.31	0.0954	20	7.2	paleturquoise	4	0.4846	EMPTY	EMPTY	EMPTY	EMPTY	EMPTY	EMPTY	EMPTY	FALSE	FALSE	FALSE	TRUE	FALSE	FALSE
NONCO11956	chrY:89268208-89273472	0.7	ENSMUSG00000102045	189194	ENSMUSG00000100608	439953	EMPTY	EMPTY	FALSE	NONCO11956	chrY:89268208-89273472	0.7	ENSMUSG00000102045	189194	ENSMUSG00000100608	439953	EMPTY	EMPTY	0.1085	20	29.1	blue	5.7	0.1083	EMPTY	EMPTY	EMPTY	EMPTY	EMPTY	EMPTY	EMPTY	FALSE	FALSE	FALSE	FALSE	FALSE	FALSE
NONCO11959	chrY:857523-873749	0.3	ENSMUSG00000069053	13300	ENSMUSG00000056673	24040	EMPTY	EMPTY	FALSE	NONCO11959	chrY:857523-873749	0.3	ENSMUSG00000069053	13300	ENSMUSG00000056673	24040	EMPTY	EMPTY	0.5461	22	32826.1	turquoise	1.1	NA	EMPTY	0.48	0.14	3.39	0.43	1.13	EMPTY	FALSE	FALSE	FALSE	FALSE	FALSE	FALSE
NONCO11963	chrY:1046665-1050200	8.1	ENSMUSG00000069049	17819	ENSMUSG00000068457	46662	0.09	0.04	FALSE	NONCO11963	chrY:1046665-1050200	8.1	ENSMUSG00000069049	17819	ENSMUSG00000068457	46662	0.09	0.04	0.193	2	2.3	greenyellow	91.5	0.3233	EMPTY	EMPTY	EMPTY	EMPTY	EMPTY	EMPTY	Gm29650	FALSE	FALSE	FALSE	TRUE	FALSE	TRUE
NONCO11967	chrY:20534690-20558199	0.5	ENSMUSG00000103371	1395598	ENSMUSG00000102668	409279	EMPTY	EMPTY	FALSE	NONCO11967	chrY:20534690-20558199	0.5	ENSMUSG00000103371	1395598	ENSMUSG00000102668	409279	EMPTY	EMPTY	1	11	8	brown	3	0.6042	EMPTY	0.82	0.14	5.79	0.09	9.06	EMPTY	FALSE	FALSE	FALSE	FALSE	FALSE	FALSE
NONCO11972	chr11:3123995-3125900	21.4	End of chr11	3123995	ENSMUSG00000023764	5951	EMPTY	EMPTY	FALSE	NONCO11972	chr11:3123995-3125900	21.4	End of chr11	3123995	ENSMUSG00000023764	5951	EMPTY	EMPTY	0.0214	22	4	turquoise	27.6	0.0515	EMPTY	0.28	0.02	17.71	0.01	27.78	EMPTY	FALSE	FALSE	FALSE	TRUE	FALSE	FALSE
NONCO11984	chr11:3625336-3625876	0.4	ENSMUSG00000020439	84725	ENSMUSG00000034543	23619	-0.28	-0.19	FALSE	NONCO11984	chr11:3625336-3625876	0.4	ENSMUSG00000020439	84725	ENSMUSG00000034543	23619	-0.28	-0.19	1	15	6.1	blue	1.8	NA	EMPTY	0.91	0.01	60.69	0.19	4.67	Gm11949	FALSE	FALSE	FALSE	FALSE	TRUE	FALSE
NONCO12007	chr11:5485665-5506635	15.2	ENSMUSG00000041961	40819	ENSMUSG00000020484	14025	-0.39	0.49	FALSE	NONCO12007	chr11:5485665-5506635	15.2	ENSMUSG00000041961	40819	ENSMUSG00000020484	14025	-0.39	0.49	0.193	6	3	midnightblue	104.2	0.0581	EMPTY	0.79	0.14	5.53	0.14	5.8	Gm11962,Gm11963	FALSE	TRUE	FALSE	TRUE	TRUE	FALSE
NONCO12017	chr11:6083621-6087823	1	ENSMUSG00000057897	17260	ENSMUSG00000053838	17869	-0.29	-0.3	FALSE	NONCO12017	chr11:6083621-6087823	1	ENSMUSG00000057897	17260	ENSMUSG00000053838	17869	-0.29	-0.3	1	7	128525	midnightblue	5.9	0.013	ENSG00000257647	0.01	0.19	0.06	0.04	0.35	EMPTY	FALSE	FALSE	FALSE	FALSE	FALSE	FALSE
NONCO12018	chr11:6094542-6100150	3.5	ENSMUSG00000057897	28181	ENSMUSG00000053838	5542	-0.41	-0.01	FALSE	NONCO12018	chr11:6094542-6100150	3.5	ENSMUSG00000057897	28181	ENSMUSG00000053838	5542	-0.41	-0.01	0.5013	2	4.3	turquoise	127	0.0127	EMPTY	0.16	0.06	2.59	0.09	1.67	EMPTY	FALSE	FALSE	FALSE	FALSE	FALSE	FALSE
NONCO1202	chr1:85511133-85527161	0	ENSMUSG00000052477	240568	ENSMUSG00000094127	48516	EMPTY	EMPTY	FALSE	NONCO1202	chr1:85511133-85527161	0	ENSMUSG00000052477	240568	ENSMUSG00000094127	48516	EMPTY	EMPTY	0.0759	20	6.2	paleturquoise	5.4	0.276	EMPTY	0.06	0.06	0.93	0.12	0.46	Gm16092	TRUE	FALSE	FALSE	FALSE	FALSE	FALSE
NONCO12035	chr11:9149447-9150684	39.9	ENSMUSG00000020407	13278	ENSMUSG00000004668	41259	0.21	-0.09	FALSE	NONCO12035	chr11:9149447-9150684	39.9	ENSMUSG00000020407	13278	ENSMUSG00000004668	41259	0.21	-0.09	0.7666	1	1.4	salmon4	99.3	0.5732	EMPTY	0.82	0.02	44.97	0.18	4.47	Gm11993	FALSE	FALSE	FALSE	TRUE	TRUE	FALSE
NONCO12044	chr11:12648066-12648473	9.9	ENSMUSG00000020173	183107	ENSMUSG00000048834	3609252	-0.38	-0.2	TRUE	NONCO12044	chr11:12648066-12648473	9.9	ENSMUSG00000020173	183107	ENSMUSG00000048834	3609252	-0.38	-0.2	0.0455	13	37.1	saddlebrown	9.8	0	EMPTY	0.35	0.01	65.66	0.29	1.2	EMPTY	FALSE	FALSE	FALSE	FALSE	TRUE	FALSE
NONCO12045	chr11:16634086-16636140	19.7	ENSMUSG00000078974	125603	ENSMUSG00000020122	116064	0.1	0.24	TRUE	NONCO12045	chr11:16634086-16636140	19.7	ENSMUSG00000078974	125603	ENSMUSG00000020122	116064	0.1	0.24	0.0149	0	2.3	turquoise	226.2	0.0007	EMPTY	0.8	0.08	10.21	0.03	31.36	Gm12663	FALSE	FALSE	FALSE	TRUE	TRUE	FALSE
NONCO12047	chr11:17340935-17355129	0.6	ENSMUSG00000000581	71760	ENSMUSG00000016984	583628	0.42	0.46	FALSE	NONCO12047	chr11:17340935-17355129	0.6	ENSMUSG00000000581	71760	ENSMUSG00000016984	583628	0.42	0.46	1	7	5.3	lightyellow	4.1	0.9317	EMPTY	0.01	0.14	0.08	0.14	0.08	EMPTY	FALSE	FALSE	FALSE	TRUE	FALSE	TRUE
NONCO12054	chr11:19855646-19861546	5.9	ENSMUSG00000020160	836662	ENSMUSG00000045671	62830	-0.45	0.15	FALSE	NONCO12054	chr11:19855646-19861546	5.9	ENSMUSG00000020160	836662	ENSMUSG00000045671	62830	-0.45	0.15	0.193	9	7.6	midnightblue	8.6	0.0053	EMPTY	0.5	0.14	3.51	0.13	3.92	EMPTY	FALSE	FALSE	FALSE	FALSE	FALSE	FALSE
NONCO12060	chr11:20372580-20375400	0.3	ENSMUSG00000020142	39868	ENSMUSG00000049800	167854	0.31	0.5	FALSE	NONCO12060	chr11:20372580-20375400	0.3	ENSMUSG00000020142	39868	ENSMUSG00000049800	167854	0.31	0.5	1	18	55333.3	blue	2.1	0.6208	EMPTY	0.3	0.14	2.15	0.22	1.39	EMPTY	FALSE	FALSE	FALSE	FALSE	FALSE	FALSE
NONCO12063	chr11:20859556-20862196	0	ENSMUSG00000042363	28501	ENSMUSG00000020134	229096	-0.13	-0.01	FALSE	NONCO12063	chr11:20859556-20862196	0	ENSMUSG00000042363	28501	ENSMUSG00000020134	229096	-0.13	-0.01	1	15	36170.7	white	1.3	NA	EMPTY	EMPTY	EMPTY	EMPTY	EMPTY	EMPTY	EMPTY	FALSE	FALSE	FALSE	FALSE	FALSE	FALSE
NONCO12071	chr11:22534196-22560125	1.7	ENSMUSG00000049904	14963	ENSMUSG00000101716	199614	EMPTY	EMPTY	FALSE	NONCO12071	chr11:22534196-22560125	1.7	ENSMUSG00000049904	14963	ENSMUSG00000101716	199614	EMPTY	EMPTY	1	8	15.1	brown	2.1	0.4967	EMPTY	0.01	0.03	0.4	0.32	0.03	EMPTY	FALSE	FALSE	FALSE	FALSE	FALSE	FALSE
NONCO12078	chr11:23067756-23075574	1.9	ENSMUSG00000049811	36969	ENSMUSG00000020290	180468	0.26	-0.63	FALSE	NONCO12078	chr11:23067756-23075574	1.9	ENSMUSG00000049811	36969	ENSMUSG00000020290	180468	0.26	-0.63	0.9921	10	2.4	lightcyan	65.2	0.0452	ENSG00000259363	0.26	0.69	0.37	0.18	1.46	Gm12059	TRUE	TRUE	TRUE	TRUE	FALSE	FALSE
NONCO12094	chr11:24034274-24041038	0.2	ENSMUSG00000020273	139022	ENSMUSG00000055010	7918	0.71	0.26	FALSE	NONCO12094	chr11:24034274-24041038	0.2	ENSMUSG00000020273	139022	ENSMUSG00000055010	7918	0.71	0.26	1	11	5.4	turquoise	5.1	0.8757	EMPTY	0.01	0	Inf	0.03	0.26	EMPTY	FALSE	FALSE	FALSE	FALSE	FALSE	FALSE
NONCO12115	chr11:29595787-29599832	0.1	ENSMUSG00000020461	17421	ENSMUSG00000020458	93116	-0.22	-0.09	FALSE	NONCO12115	chr11:29595787-29599832	0.1	ENSMUSG00000020461	17421	ENSMUSG00000020458	93116	-0.22	-0.09	0.9921	14	11473.6	brown4	0.5	NA	ENSG00000275175	EMPTY	EMPTY	EMPTY	EMPTY	EMPTY	Gm12088	TRUE	FALSE	FALSE	FALSE	FALSE	FALSE
NONCO12125	chr11:30296835-30299149	1	ENSMUSG00000020315	28661	ENSMUSG00000040919	126858	EMPTY	EMPTY	FALSE	NONCO12125	chr11:30296835-30299149	1	ENSMUSG00000020315	28661	ENSMUSG00000040919	126858	EMPTY	EMPTY	0.3159	2	17.4	brown	30.5	0.0071	EMPTY	EMPTY	EMPTY	EMPTY	EMPTY	EMPTY	EMPTY	FALSE	FALSE	FALSE	FALSE	FALSE	FALSE
NONCO12131	chr11:30899652-30900835	14.1	ENSMUSG00000043999	5924	ENSMUSG00000020311	29940	-0.64	0.5	TRUE	NONCO12131	chr11:30899652-30900835	14.1	ENSMUSG00000043999	5924	ENSMUSG00000020311	29940	-0.64	0.5	0.0017	4	5.9	midnightblue	217.4	0	EMPTY	0.26	0.4	0.64	0.29	0.87	EMPTY	FALSE	FALSE	FALSE	FALSE	FALSE	FALSE
NONCO12132	chr11:30902430-30906191	1.6	ENSMUSG00000043999	8702	ENSMUSG00000020311	24584	-0.37	0.41	FALSE	NONCO12132	chr11:30902430-30906191	1.6	ENSMUSG00000043999	8702	ENSMUSG00000020311	24584	-0.37	0.41	0.0795	6	161280	lightyellow	6.6	0.0326	EMPTY	EMPTY	EMPTY	EMPTY	EMPTY	EMPTY	EMPTY	FALSE	FALSE	FALSE	FALSE	FALSE	FALSE
NONCO12134	chr11:31149707-31158622	2.8	ENSMUSG00000020305	47004	ENSMUSG00000091195	23755	-0.01	0.27	FALSE	NONCO12134	chr11:31149707-31158622	2.8	ENSMUSG00000020305	47004	ENSMUSG00000091195	23755	-0.01	0.27	0.3159	17	14.6	paleturquoise	3.1	0.2071	EMPTY	EMPTY	EMPTY	EMPTY	EMPTY	EMPTY	EMPTY	FALSE	FALSE	FALSE	FALSE	FALSE	TRUE
NONCO12138	chr11:31858225-31859781	1.2	ENSMUSG00000044502	186341	ENSMUSG00000020300	12431	-0.4	-0.28	FALSE	NONCO12138	chr11:31858225-31859781	1.2	ENSMUSG00000044502	186341	ENSMUSG00000020300	12431	-0.4	-0.28	0.254	21	105.8	turquoise	18.9	0.041	EMPTY	0.09	0.14	0.63	0.22	0.4	EMPTY	FALSE	FALSE	FALSE	FALSE	FALSE	FALSE
NONCO12140	chr11:32087055-32108773	0.3	ENSMUSG00000020297	27854	ENSMUSG00000020279	78769	EMPTY	EMPTY	FALSE	NONCO12140	chr11:32087055-32108773	0.3	ENSMUSG00000020297	27854	ENSMUSG00000020279	78769	EMPTY	EMPTY	1	11	138940	greenyellow	3.3	0.1535	EMPTY	0.03	0	33.96	0.15	0.18	EMPTY	FALSE	FALSE	FALSE	FALSE	FALSE	FALSE
NONCO12141	chr11:32127716-32158400	1.3	ENSMUSG00000020297	68515	ENSMUSG00000020279	29142	EMPTY	EMPTY	FALSE	NONCO12141	chr11:32127716-32158400	1.3	ENSMUSG00000020297	68515	ENSMUSG00000020279	29142	EMPTY	EMPTY	0.5461	2	5.8	lightyellow	7.2	0.8543	ENSG00000259676	0.65	0.06	10.28	0.09	7.43	EMPTY	FALSE	FALSE	FALSE	TRUE	FALSE	FALSE
NONCO12142	chr11:32161301-32174280	0.7	ENSMUSG00000020297	102100	ENSMUSG00000020279	13262	EMPTY	EMPTY	FALSE	NONCO12142	chr11:32161301-32174280	0.7	ENSMUSG00000020297	102100	ENSMUSG00000020279	13262	EMPTY	EMPTY	0.3708	20	10.9	paleturquoise	5.2	0.7887	ENSG00000260123	EMPTY	EMPTY	EMPTY	EMPTY	EMPTY	EMPTY	FALSE	FALSE	FALSE	FALSE	FALSE	FALSE
NONCO12183	chr11:40036226-40050205	10.6	ENSMUSG00000049336	2800263	ENSMUSG00000042032	629110	0.2	-0.35	FALSE	NONCO12183	chr11:40036226-40050205	10.6	ENSMUSG00000049336	2800263	ENSMUSG00000042032	629110	0.2	-0.35	1	5	6.5	brown	14.4	0.2389	EMPTY	0.03	0.14	0.19	0.02	1.26	EMPTY	FALSE	FALSE	FALSE	FALSE	FALSE	FALSE
NONCO12187	chr11:41134653-41143287	44	ENSMUSG00000020326	379343	ENSMUSG00000020436	766917	-0.25	-0.07	TRUE	NONCO12187	chr11:41134653-41143287	44	ENSMUSG00000020326	379343	ENSMUSG00000020436	766917	-0.25	-0.07	0.0084	4	2.3	midnightblue	229.4	0	EMPTY	0.78	0.14	5.49	0.02	50.34	EMPTY	FALSE	FALSE	FALSE	FALSE	FALSE	FALSE
NONCO12205	chr11:46173074-46173684	1.4	ENSMUSG00000020411	6567	ENSMUSG00000020340	20167	-0.21	-0.49	FALSE	NONCO12205	chr11:46173074-46173684	1.4	ENSMUSG00000020411	6567	ENSMUSG00000020340	20167	-0.21	-0.49	0.4325	4	82.5	brown	8.2	0.0543	EMPTY	0.03	0.14	0.21	0.25	0.12	EMPTY	FALSE	FALSE	FALSE	FALSE	FALSE	FALSE
NONCO12209	chr11:46449085-46449878	13.9	ENSMUSG00000020397	6365	ENSMUSG00000020399	5058	0.43	-0.3	FALSE	NONCO12209	chr11:46449085-46449878	13.9	ENSMUSG00000020397	6365	ENSMUSG00000020399	5058	0.43	-0.3	0.4325	12	3.2	midnightblue	15.8	0.1482	ENSG00000257894	0.03	0.07	0.43	0.23	0.13	EMPTY	FALSE	FALSE	FALSE	FALSE	FALSE	FALSE
NONCO12212	chr11:48750708-48765728	0.6	ENSMUSG00000020354	761740	ENSMUSG00000020372	34605	-0.27	-0.29	FALSE	NONCO12212	chr11:48750708-48765728	0.6	ENSMUSG00000020354	761740	ENSMUSG00000020372	34605	-0.27	-0.29	0.1085	8	101890	brown	3.3	0.0622	EMPTY	0.97	0.01	112.47	0.12	7.82	Gm12183	FALSE	FALSE	FALSE	TRUE	TRUE	FALSE
NONCO12213	chr11:48792312-48795298	12.3	ENSMUSG00000020354	803344	ENSMUSG00000020372	5035	0.29	0.41	TRUE	NONCO12213	chr11:48792312-48795298	12.3	ENSMUSG00000020354	803344	ENSMUSG00000020372	5035	0.29	0.41	0.018	22	5.1	blue	184.3	0	EMPTY	0.22	0.01	24.06	0.11	2.05	EMPTY	FALSE	TRUE	TRUE	FALSE	FALSE	TRUE
NONCO12244	chr11:51897680-51909610	2.2	ENSMUSG00000020387	40028	ENSMUSG00000020392	58052	-0.49	-0.54	FALSE	NONCO12244	chr11:51897680-51909610	2.2	ENSMUSG00000020387	40028	ENSMUSG00000020392	58052	-0.49	-0.54	0.2156	22	37	turquoise	51.4	0.0598	EMPTY	0.12	0.03	3.99	0.29	0.41	EMPTY	FALSE	FALSE	FALSE	TRUE	FALSE	TRUE
NONCO12248	chr11:52155316-52155970	0.2	ENSMUSG00000062204	9789	ENSMUSG00000060170	57083	EMPTY	EMPTY	FALSE	NONCO12248	chr11:52155316-52155970	0.2	ENSMUSG00000062204	9789	ENSMUSG00000060170	57083	EMPTY	EMPTY	0.6669	2	27862	turquoise	0.9	NA	EMPTY	0.28	0.88	0.32	0.19	1.46	Olfr1372-ps1	FALSE	FALSE	FALSE	FALSE	FALSE	FALSE
NONCO12253	chr11:52648495-52708908	1.3	ENSMUSG00000036275	239768	ENSMUSG00000036264	55727	-0.34	-0.28	FALSE	NONCO12253	chr11:52648495-52708908	1.3	ENSMUSG00000036275	239768	ENSMUSG00000036264	55727	-0.34	-0.28	0.2696	20	255136	turquoise	9.6	0.0151	EMPTY	0.19	0.14	1.35	0.14	1.34	EMPTY	FALSE	TRUE	FALSE	FALSE	FALSE	FALSE
NONCO12278	chr11:57542798-57544418	0.5	ENSMUSG00000020522	8984	ENSMUSG00000020520	101025	0.12	-0.62	FALSE	NONCO12278	chr11:57542798-57544418	0.5	ENSMUSG00000020522	8984	ENSMUSG00000020520	101025	0.12	-0.62	0.5782	0	25	brown	7.1	NA	EMPTY	0.24	0	296.78	0.05	4.57	EMPTY	FALSE	FALSE	FALSE	FALSE	FALSE	FALSE
NONCO12281	chr11:58097052-58097746	10.8	ENSMUSG00000037331	35019	ENSMUSG00000020515	6408	0.49	0.32	FALSE	NONCO12281	chr11:58097052-58097746	10.8	ENSMUSG00000037331	35019	ENSMUSG00000020515	6408	0.49	0.32	1	11	2.3	blue	2.1	0.9923	ENSG00000251323	0.02	0.04	0.41	0.19	0.09	Gm12247	FALSE	TRUE	FALSE	FALSE	TRUE	FALSE
NONCO12333	chr11:61769429-61770513	0.2	ENSMUSG00000020528	7342	ENSMUSG00000004798	5137	-0.55	0.28	FALSE	NONCO12333	chr11:61769429-61770513	0.2	ENSMUSG00000020528	7342	ENSMUSG00000004798	5137	-0.55	0.28	1	15	67224.6	darkred	2.8	0.1345	EMPTY	0.11	0.34	0.32	0.19	0.55	EMPTY	FALSE	FALSE	FALSE	FALSE	FALSE	FALSE
NONCO12348	chr11:62938694-62939338	0.7	ENSMUSG00000014177	21915	ENSMUSG00000042200	11856	EMPTY	EMPTY	FALSE	NONCO12348	chr11:62938694-62939338	0.7	ENSMUSG00000014177	21915	ENSMUSG00000042200	11856	EMPTY	EMPTY	1	17	95260.9	lightyellow	3.1	0.1164	ENSG00000257526	0.01	0.17	0.07	0.11	0.1	EMPTY	FALSE	FALSE	FALSE	FALSE	FALSE	FALSE
NONCO12356	chr11:64202464-64205852	0.8	ENSMUSG00000042148	122997	ENSMUSG00000095224	229305	EMPTY	EMPTY	FALSE	NONCO12356	chr11:64202464-64205852	0.8	ENSMUSG00000042148	122997	ENSMUSG00000095224	229305	EMPTY	EMPTY	1	17	58.5	blue	5.9	0.3358	EMPTY	0.01	0	10.93	0.15	0.07	EMPTY	FALSE	FALSE	FALSE	FALSE	FALSE	FALSE
NONCO1237	chr1:88443986-88462619	3.5	ENSMUSG00000026295	17549	ENSMUSG00000062310	37253	EMPTY	EMPTY	FALSE	NONCO1237	chr1:88443986-88462619	3.5	ENSMUSG00000026295	17549	ENSMUSG00000062310	37253	EMPTY	EMPTY	1	7	8.3	blue	12.3	0.7534	EMPTY	0	0.07	0.05	0.14	0.03	Gm29538	FALSE	FALSE	FALSE	TRUE	FALSE	FALSE
NONCO12373	chr11:68566998-68572493	0.3	ENSMUSG00000048329	8754	ENSMUSG00000045915	14529	EMPTY	EMPTY	FALSE	NONCO12373	chr11:68566998-68572493	0.3	ENSMUSG00000048329	8754	ENSMUSG00000045915	14529	EMPTY	EMPTY	1	15	59494.8	ivory	3.2	0.7451	EMPTY	EMPTY	EMPTY	EMPTY	EMPTY	EMPTY	EMPTY	FALSE	FALSE	FALSE	FALSE	FALSE	FALSE
NONCO1240	chr1:89358858-89406256	1.9	ENSMUSG00000036206	203791	ENSMUSG00000055013	48551	-0.25	-0.41	TRUE	NONCO1240	chr1:89358858-89406256	1.9	ENSMUSG00000036206	203791	ENSMUSG00000055013	48551	-0.25	-0.41	0.0256	4	30.7	brown	13.2	0.0009	EMPTY	0.03	0.01	2.44	0.12	0.25	C030007H22Rik	FALSE	FALSE	FALSE	FALSE	FALSE	FALSE
NONCO12413	chr11:71389705-71392850	0.4	ENSMUSG00000070390	158973	ENSMUSG00000020811	357071	EMPTY	EMPTY	FALSE	NONCO12413	chr11:71389705-71392850	0.4	ENSMUSG00000070390	158973	ENSMUSG00000020811	357071	EMPTY	EMPTY	1	11	7.3	greenyellow	3.4	0.9265	EMPTY	0.03	0.02	1.27	0.06	0.43	EMPTY	FALSE	FALSE	FALSE	TRUE	FALSE	FALSE
NONCO12415	chr11:71649729-71664697	17	ENSMUSG00000070390	418997	ENSMUSG00000020811	85224	EMPTY	EMPTY	TRUE	NONCO12415	chr11:71649729-71664697	17	ENSMUSG00000070390	418997	ENSMUSG00000020811	85224	EMPTY	EMPTY	0.0069	4	11.8	midnightblue	54.4	0	EMPTY	0.02	0.02	0.88	0.18	0.09	EMPTY	FALSE	FALSE	FALSE	FALSE	FALSE	FALSE
NONCO12439	chr11:75281513-75285603	0.7	ENSMUSG00000045287	13745	ENSMUSG00000000751	12564	0.34	-0.1	FALSE	NONCO12439	chr11:75281513-75285603	0.7	ENSMUSG00000045287	13745	ENSMUSG00000000751	12564	0.34	-0.1	1	14	8.1	darkgreen	3.6	0.898	EMPTY	0.44	0.32	1.37	0.05	9.55	EMPTY	FALSE	FALSE	FALSE	FALSE	FALSE	FALSE
NONCO12486	chr11:79224702-79232106	0.1	ENSMUSG00000018334	78296	ENSMUSG00000017677	7267	-0.09	-0.2	FALSE	NONCO12486	chr11:79224702-79232106	0.1	ENSMUSG00000018334	78296	ENSMUSG00000017677	7267	-0.09	-0.2	1	11	39274.6	thistle2	2.1	0.8709	EMPTY	EMPTY	EMPTY	EMPTY	EMPTY	EMPTY	EMPTY	FALSE	FALSE	FALSE	TRUE	FALSE	FALSE
NONCO12488	chr11:79260343-79267974	4.3	ENSMUSG00000017677	5673	ENSMUSG00000055072	28206	EMPTY	EMPTY	FALSE	NONCO12488	chr11:79260343-79267974	4.3	ENSMUSG00000017677	5673	ENSMUSG00000055072	28206	EMPTY	EMPTY	0.018	4	6.1	midnightblue	4.6	0.3138	EMPTY	EMPTY	EMPTY	EMPTY	EMPTY	EMPTY	EMPTY	FALSE	FALSE	FALSE	FALSE	FALSE	FALSE
NONCO12489	chr11:79325215-79327493	5	ENSMUSG00000055072	28310	ENSMUSG00000020716	12201	EMPTY	EMPTY	FALSE	NONCO12489	chr11:79325215-79327493	5	ENSMUSG00000055072	28310	ENSMUSG00000020716	12201	EMPTY	EMPTY	1	9	4.1	salmon4	13.5	0.7453	EMPTY	0.12	0.09	1.42	0.13	0.94	EMPTY	FALSE	FALSE	FALSE	FALSE	FALSE	FALSE
NONCO12496	chr11:79704820-79705416	0.3	ENSMUSG00000017639	6798	ENSMUSG00000035575	226906	0.24	0.12	FALSE	NONCO12496	chr11:79704820-79705416	0.3	ENSMUSG00000017639	6798	ENSMUSG00000035575	226906	0.24	0.12	1	13	6.9	brown	1.5	NA	EMPTY	0	0.02	0.19	0.12	0.03	Gm11205	FALSE	FALSE	TRUE	FALSE	FALSE	FALSE
NONCO12499	chr11:79973749-79976019	1.1	ENSMUSG00000035575	11360	ENSMUSG00000017548	17088	-0.26	-0.59	TRUE	NONCO12499	chr11:79973749-79976019	1.1	ENSMUSG00000035575	11360	ENSMUSG00000017548	17088	-0.26	-0.59	0.0366	12	19.1	lightcyan	12.5	0.0181	EMPTY	0.05	0	36.56	0.19	0.26	EMPTY	FALSE	FALSE	TRUE	TRUE	FALSE	FALSE
NONCO12528	chr11:83223576-83226604	0.6	ENSMUSG00000018986	8423	ENSMUSG00000082101	48507	EMPTY	EMPTY	FALSE	NONCO12528	chr11:83223576-83226604	0.6	ENSMUSG00000018986	8423	ENSMUSG00000082101	48507	EMPTY	EMPTY	1	9	216003	white	7.4	0.1181	EMPTY	0.07	0.24	0.29	0.19	0.35	AI662270	TRUE	FALSE	TRUE	TRUE	FALSE	TRUE
NONCO12580	chr11:88062773-88063227	0.5	ENSMUSG00000018379	9019	ENSMUSG00000018377	5053	-0.24	-0.13	FALSE	NONCO12580	chr11:88062773-88063227	0.5	ENSMUSG00000018379	9019	ENSMUSG00000018377	5053	-0.24	-0.13	1	13	14785.7	paleturquoise	0.9	NA	EMPTY	0.11	0.08	1.3	0.21	0.51	EMPTY	FALSE	FALSE	FALSE	FALSE	FALSE	FALSE
NONCO12584	chr11:88254267-88256764	1.3	ENSMUSG00000023723	42761	ENSMUSG00000034031	37295	EMPTY	EMPTY	FALSE	NONCO12584	chr11:88254267-88256764	1.3	ENSMUSG00000023723	42761	ENSMUSG00000034031	37295	EMPTY	EMPTY	0.8278	0	19	lightyellow	15	0.4452	EMPTY	0.17	0	Inf	0.02	8.81	EMPTY	FALSE	FALSE	TRUE	FALSE	FALSE	FALSE
NONCO12585	chr11:88245244-88246505	1.3	ENSMUSG00000023723	33738	ENSMUSG00000034031	47554	EMPTY	EMPTY	FALSE	NONCO12585	chr11:88245244-88246505	1.3	ENSMUSG00000023723	33738	ENSMUSG00000034031	47554	EMPTY	EMPTY	1	5	41.3	brown	13.9	0.1412	EMPTY	0.46	0.91	0.5	0.15	2.98	EMPTY	FALSE	FALSE	FALSE	FALSE	FALSE	FALSE
NONCO12594	chr11:88803535-88804476	0.6	ENSMUSG00000069769	85023	ENSMUSG00000018428	26317	0.56	-0.11	FALSE	NONCO12594	chr11:88803535-88804476	0.6	ENSMUSG00000069769	85023	ENSMUSG00000018428	26317	0.56	-0.11	1	11	7.9	brown	11.3	0.3427	EMPTY	0.04	0.1	0.38	0.22	0.17	EMPTY	FALSE	FALSE	FALSE	FALSE	FALSE	FALSE
NONCO12604	chr11:89712103-89713001	0.7	ENSMUSG00000047773	72473	ENSMUSG00000020553	269665	-0.42	-0.31	FALSE	NONCO12604	chr11:89712103-89713001	0.7	ENSMUSG00000047773	72473	ENSMUSG00000020553	269665	-0.42	-0.31	0.1817	7	33	midnightblue	6.4	0.1993	EMPTY	0.04	0.01	3.29	0.04	0.92	EMPTY	FALSE	FALSE	FALSE	FALSE	FALSE	FALSE
NONCO12606	chr11:89727142-89733166	3.1	ENSMUSG00000047773	87512	ENSMUSG00000020553	249500	-0.33	0.47	FALSE	NONCO12606	chr11:89727142-89733166	3.1	ENSMUSG00000047773	87512	ENSMUSG00000020553	249500	-0.33	0.47	1	7	5.6	brown	57.2	0.7594	EMPTY	0.18	0.01	14.73	0.09	2.09	EMPTY	FALSE	FALSE	FALSE	FALSE	FALSE	FALSE
NONCO1261	chr1:91471302-91479885	12.1	ENSMUSG00000055866	11979	ENSMUSG00000034292	14763	0.02	0.04	FALSE	NONCO1261	chr1:91471302-91479885	12.1	ENSMUSG00000055866	11979	ENSMUSG00000034292	14763	0.02	0.04	1	5	3.4	salmon4	43.9	0.0151	EMPTY	0.17	0.18	0.92	0.09	1.84	EMPTY	FALSE	FALSE	FALSE	FALSE	FALSE	FALSE
NONCO12611	chr11:90418254-90420114	0.2	ENSMUSG00000003949	27360	ENSMUSG00000020546	56379	0.1	0.27	FALSE	NONCO12611	chr11:90418254-90420114	0.2	ENSMUSG00000003949	27360	ENSMUSG00000020546	56379	0.1	0.27	0.7225	4	11	turquoise	5.4	0.6	EMPTY	0.02	0.14	0.13	0.09	0.2	EMPTY	FALSE	FALSE	FALSE	FALSE	FALSE	FALSE
NONCO12622	chr11:93828867-93849495	0.5	ENSMUSG00000056158	227119	ENSMUSG00000054079	9749	-0.06	0.2	FALSE	NONCO12622	chr11:93828867-93849495	0.5	ENSMUSG00000056158	227119	ENSMUSG00000054079	9749	-0.06	0.2	1	9	7.8	lightyellow	7.7	0.8196	EMPTY	0.12	0	38.97	0.07	1.69	EMPTY	FALSE	FALSE	FALSE	TRUE	FALSE	FALSE
NONCO12626	chr11:94133407-94155977	84.1	ENSMUSG00000020859	7323	ENSMUSG00000037573	55478	-0.23	0.86	TRUE	NONCO12626	chr11:94133407-94155977	84.1	ENSMUSG00000020859	7323	ENSMUSG00000037573	55478	-0.23	0.86	0.031	6	2.3	midnightblue	396.2	0.0048	EMPTY	0.16	0.04	4.58	0.04	4.52	B230206L02Rik	TRUE	TRUE	FALSE	TRUE	FALSE	FALSE
NONCO12663	chr11:96875260-96877274	2	ENSMUSG00000018672	14058	ENSMUSG00000018669	30153	0.61	-0.58	FALSE	NONCO12663	chr11:96875260-96877274	2	ENSMUSG00000018672	14058	ENSMUSG00000018669	30153	0.61	-0.58	0.9417	6	97.4	brown	7.1	0.0311	EMPTY	0.09	0.28	0.32	0.16	0.55	EMPTY	FALSE	FALSE	FALSE	TRUE	FALSE	FALSE
NONCO1268	chr1:92689634-92699823	0.7	ENSMUSG00000044055	40794	ENSMUSG00000034220	131823	-0.22	-0.22	FALSE	NONCO1268	chr1:92689634-92699823	0.7	ENSMUSG00000044055	40794	ENSMUSG00000034220	131823	-0.22	-0.22	0.5461	20	95057.5	brown4	2.7	0.2193	EMPTY	0.07	0	34.16	0.05	1.47	EMPTY	FALSE	FALSE	FALSE	FALSE	FALSE	FALSE
NONCO1270	chr1:92714091-92730759	0.6	ENSMUSG00000044055	65251	ENSMUSG00000034220	100887	0.45	-0.12	FALSE	NONCO1270	chr1:92714091-92730759	0.6	ENSMUSG00000044055	65251	ENSMUSG00000034220	100887	0.45	-0.12	0.5461	21	277838	lightsteelblue1	7.4	0.266	EMPTY	0	0	1.07	0.01	0.36	Gm29483	FALSE	FALSE	FALSE	TRUE	FALSE	FALSE
NONCO12716	chr11:100361477-100363620	1179.2	ENSMUSG00000006930	5350	ENSMUSG00000001552	5339	-0.23	-0.7	FALSE	NONCO12716	chr11:100361477-100363620	1179.2	ENSMUSG00000006930	5350	ENSMUSG00000001552	5339	-0.23	-0.7	0.3159	2	2.4	salmon4	2281.1	0	ENSG00000270972	0	0.02	0.25	0.15	0.03	Gm10039	FALSE	FALSE	FALSE	TRUE	TRUE	FALSE
NONCO12757	chr11:102732405-102752861	2.7	ENSMUSG00000020925	34624	ENSMUSG00000020926	8579	-0.29	-0.09	FALSE	NONCO12757	chr11:102732405-102752861	2.7	ENSMUSG00000020925	34624	ENSMUSG00000020926	8579	-0.29	-0.09	0.8745	22	4.9	violet	50.4	0.1891	EMPTY	0.01	0.02	0.84	0.01	2.64	Gm16342	TRUE	FALSE	FALSE	TRUE	FALSE	FALSE
NONCO12758	chr11:102708648-102710789	1	ENSMUSG00000020925	10867	ENSMUSG00000020926	50651	0.19	-0.11	FALSE	NONCO12758	chr11:102708648-102710789	1	ENSMUSG00000020925	10867	ENSMUSG00000020926	50651	0.19	-0.11	1	13	134381	turquoise	6.8	0.0689	EMPTY	0.25	0.17	1.48	0.17	1.43	EMPTY	FALSE	FALSE	FALSE	TRUE	FALSE	FALSE
NONCO1284	chr1:94254477-94261302	0.1	ENSMUSG00000026285	201925	ENSMUSG00000051185	1052322	0	-0.31	FALSE	NONCO1284	chr1:94254477-94261302	0.1	ENSMUSG00000026285	201925	ENSMUSG00000051185	1052322	0	-0.31	1	20	9	turquoise	2.2	0.6963	EMPTY	EMPTY	EMPTY	EMPTY	EMPTY	EMPTY	EMPTY	FALSE	FALSE	FALSE	FALSE	FALSE	FALSE
NONCO12846	chr11:109343891-109344657	1.7	ENSMUSG00000020599	45763	ENSMUSG00000020611	18175	-0.36	-0.44	FALSE	NONCO12846	chr11:109343891-109344657	1.7	ENSMUSG00000020599	45763	ENSMUSG00000020611	18175	-0.36	-0.44	0.2979	22	10.7	blue	10.7	0.5909	EMPTY	0.3	0	Inf	0.07	4.59	EMPTY	FALSE	FALSE	FALSE	TRUE	FALSE	FALSE
NONCO1285	chr1:95492993-95499240	1062.7	ENSMUSG00000051185	157710	ENSMUSG00000040710	88443	0.96	0.72	TRUE	NONCO1285	chr1:95492993-95499240	1062.7	ENSMUSG00000051185	157710	ENSMUSG00000040710	88443	0.96	0.72	0.031	5	9.3	midnightblue	410	0	EMPTY	0.8	0	206.87	0.19	4.14	Gm15427	FALSE	FALSE	FALSE	TRUE	TRUE	FALSE
NONCO12858	chr11:110555514-110577278	0.9	ENSMUSG00000020623	29993	ENSMUSG00000051497	390756	0.05	-0.12	FALSE	NONCO12858	chr11:110555514-110577278	0.9	ENSMUSG00000020623	29993	ENSMUSG00000051497	390756	0.05	-0.12	0.3482	17	89530.8	orange	3	0.3883	EMPTY	0.12	0	158.27	0.01	19.37	EMPTY	FALSE	FALSE	FALSE	FALSE	FALSE	FALSE
NONCO12861	chr11:112825154-112832490	0	ENSMUSG00000000567	37395	ENSMUSG00000041654	412364	-0.33	-0.1	FALSE	NONCO12861	chr11:112825154-112832490	0	ENSMUSG00000000567	37395	ENSMUSG00000041654	412364	-0.33	-0.1	0.2979	20	17892.8	turquoise	0.7	NA	EMPTY	0.16	0.18	0.93	0.07	2.46	4933434M16Rik	TRUE	FALSE	TRUE	TRUE	FALSE	FALSE
NONCO12862	chr11:112839980-112840402	1	ENSMUSG00000000567	52221	ENSMUSG00000041654	404452	0.36	-0.45	FALSE	NONCO12862	chr11:112839980-112840402	1	ENSMUSG00000000567	52221	ENSMUSG00000041654	404452	0.36	-0.45	0.254	4	22.4	brown	3.9	0.1499	EMPTY	0.08	0.07	1.1	0.2	0.4	EMPTY	FALSE	FALSE	FALSE	FALSE	FALSE	FALSE
NONCO12866	chr11:113171633-113173657	0.6	ENSMUSG00000000567	383874	ENSMUSG00000041654	71197	-0.12	0.39	FALSE	NONCO12866	chr11:113171633-113173657	0.6	ENSMUSG00000000567	383874	ENSMUSG00000041654	71197	-0.12	0.39	1	17	92.5	blue	9.7	0.3132	EMPTY	0.01	0.02	0.39	0.03	0.32	EMPTY	FALSE	FALSE	FALSE	TRUE	FALSE	FALSE
NONCO12881	chr11:114423565-114435859	2.2	ENSMUSG00000041592	356520	ENSMUSG00000057322	232666	0.59	0.54	TRUE	NONCO12881	chr11:114423565-114435859	2.2	ENSMUSG00000041592	356520	ENSMUSG00000057322	232666	0.59	0.54	0.0307	4	723788	brown	20.1	0.0004	EMPTY	0.05	0	28.34	0.48	0.09	4932435O22Rik	FALSE	FALSE	FALSE	FALSE	FALSE	FALSE
NONCO12889	chr11:115375096-115376084	0.3	ENSMUSG00000034586	7341	ENSMUSG00000050910	5833	-0.25	0.1	FALSE	NONCO12889	chr11:115375096-115376084	0.3	ENSMUSG00000034586	7341	ENSMUSG00000050910	5833	-0.25	0.1	1	5	103925	white	2.9	0.1372	EMPTY	0.09	0.04	2.18	0.36	0.25	EMPTY	FALSE	FALSE	FALSE	FALSE	FALSE	FALSE
NONCO1290	chr1:101377198-101386690	6.2	ENSMUSG00000067028	891257	ENSMUSG00000050840	3381840	-0.22	-0.15	FALSE	NONCO1290	chr1:101377198-101386690	6.2	ENSMUSG00000067028	891257	ENSMUSG00000050840	3381840	-0.22	-0.15	0.1619	13	4.7	darkgreen	6	0.4649	EMPTY	0.8	0.14	5.64	0.19	4.13	Psmb6-ps2	FALSE	FALSE	FALSE	TRUE	TRUE	FALSE
NONCO12920	chr11:117076209-117079474	91.1	ENSMUSG00000043857	89262	ENSMUSG00000020823	35695	0.17	-0.01	FALSE	NONCO12920	chr11:117076209-117079474	91.1	ENSMUSG00000043857	89262	ENSMUSG00000020823	35695	0.17	-0.01	0.0548	9	9.1	brown	404	0	ENSG00000215881	0.02	0.05	0.51	0.11	0.22	2810008D09Rik,Gm26083	TRUE	TRUE	TRUE	TRUE	FALSE	FALSE
NONCO12924	chr11:117611247-117613857	0.5	ENSMUSG00000069588	122234	ENSMUSG00000025571	40433	-0.21	0.27	FALSE	NONCO12924	chr11:117611247-117613857	0.5	ENSMUSG00000069588	122234	ENSMUSG00000025571	40433	-0.21	0.27	1	13	143114	greenyellow	8.5	0.1403	ENSG00000260385	0.21	0.09	2.32	0.01	25.09	2900041M22Rik	TRUE	FALSE	TRUE	TRUE	FALSE	FALSE
NONCO12958	chr11:120215096-120218255	0.4	ENSMUSG00000061306	63751	ENSMUSG00000039741	14693	-0.13	-0.18	FALSE	NONCO12958	chr11:120215096-120218255	0.4	ENSMUSG00000061306	63751	ENSMUSG00000039741	14693	-0.13	-0.18	1	11	7.8	darkorange	3.5	0.9612	EMPTY	0.02	0.14	0.12	0.05	0.37	Gm11770	FALSE	FALSE	FALSE	FALSE	FALSE	FALSE
NONCO1296	chr1:105455943-105458904	12.8	ENSMUSG00000047496	99234	ENSMUSG00000056536	59519	-0.41	0.57	FALSE	NONCO1296	chr1:105455943-105458904	12.8	ENSMUSG00000047496	99234	ENSMUSG00000056536	59519	-0.41	0.57	0.114	20	26	turquoise	4.6	0.1152	EMPTY	0.58	0.03	17.74	0.17	3.53	Gm3608	FALSE	FALSE	FALSE	TRUE	TRUE	FALSE
NONCO1298	chr1:105765738-105766080	5.3	ENSMUSG00000026319	10548	ENSMUSG00000026321	14639	-0.3	-0.45	FALSE	NONCO1298	chr1:105765738-105766080	5.3	ENSMUSG00000026319	10548	ENSMUSG00000026321	14639	-0.3	-0.45	0.1817	14	13.1	darkgreen	3.1	0.1268	EMPTY	0.3	0.85	0.35	0.19	1.53	EMPTY	FALSE	FALSE	FALSE	FALSE	FALSE	FALSE
NONCO12985	chr11:121859543-121860162	5.4	ENSMUSG00000039198	16121	End of chr11	121859543	EMPTY	EMPTY	FALSE	NONCO12985	chr11:121859543-121860162	5.4	ENSMUSG00000039198	16121	End of chr11	121859543	EMPTY	EMPTY	0.1367	22	3.1	turquoise	13.1	0.3667	EMPTY	0.68	0	1242.07	0.3	2.26	EMPTY	FALSE	FALSE	FALSE	FALSE	FALSE	FALSE
NONCO13008	chr11:5268402-5268896	0.8	ENSMUSG00000020393	6845	ENSMUSG00000041961	7429	-0.14	-0.24	FALSE	NONCO13008	chr11:5268402-5268896	0.8	ENSMUSG00000020393	6845	ENSMUSG00000041961	7429	-0.14	-0.24	1	18	5.1	white	5.6	NA	ENSG00000254143	EMPTY	EMPTY	EMPTY	EMPTY	EMPTY	EMPTY	FALSE	FALSE	FALSE	FALSE	FALSE	FALSE
NONCO13019	chr11:6093979-6096099	0.8	ENSMUSG00000057897	27618	ENSMUSG00000053838	9593	-0.35	-0.14	FALSE	NONCO13019	chr11:6093979-6096099	0.8	ENSMUSG00000057897	27618	ENSMUSG00000053838	9593	-0.35	-0.14	0.254	2	168455	greenyellow	6.9	0.0564	EMPTY	0.06	0.19	0.33	0.15	0.41	EMPTY	FALSE	FALSE	FALSE	FALSE	FALSE	FALSE
NONCO13020	chr11:6242348-6242785	1.9	ENSMUSG00000020447	12206	ENSMUSG00000004393	16135	-0.34	-0.19	FALSE	NONCO13020	chr11:6242348-6242785	1.9	ENSMUSG00000020447	12206	ENSMUSG00000004393	16135	-0.34	-0.19	0.0259	10	25.6	midnightblue	4.3	0.0767	EMPTY	0.64	0.02	42.67	0.19	3.3	Gm11401	FALSE	FALSE	FALSE	TRUE	TRUE	FALSE
NONCO13024	chr11:6363564-6375374	0.2	ENSMUSG00000020456	6923	ENSMUSG00000041164	13701	-0.11	-0.17	FALSE	NONCO13024	chr11:6363564-6375374	0.2	ENSMUSG00000020456	6923	ENSMUSG00000041164	13701	-0.11	-0.17	1	9	66679	white	2.4	0.7122	EMPTY	0.62	0.75	0.82	0.19	3.18	EMPTY	FALSE	FALSE	FALSE	FALSE	FALSE	FALSE
NONCO13026	chr11:6488709-6489813	0.5	ENSMUSG00000094483	12793	ENSMUSG00000020437	16736	-0.31	0.19	FALSE	NONCO13026	chr11:6488709-6489813	0.5	ENSMUSG00000094483	12793	ENSMUSG00000020437	16736	-0.31	0.19	0.2696	13	4.1	blue	7.6	0.3811	EMPTY	0.08	0	48.15	0.31	0.27	EMPTY	FALSE	FALSE	FALSE	FALSE	FALSE	FALSE
NONCO13039	chr11:8004556-8004895	75.5	ENSMUSG00000020427	790634	ENSMUSG00000020422	426758	0.29	0.02	FALSE	NONCO13039	chr11:8004556-8004895	75.5	ENSMUSG00000020427	790634	ENSMUSG00000020422	426758	0.29	0.02	0.1367	6	5.1	midnightblue	124.9	0	EMPTY	EMPTY	EMPTY	EMPTY	EMPTY	EMPTY	EMPTY	FALSE	FALSE	FALSE	FALSE	TRUE	FALSE
NONCO13049	chr11:14162056-14163512	6.1	ENSMUSG00000020173	1697097	ENSMUSG00000048834	2094213	0.28	-0.2	FALSE	NONCO13049	chr11:14162056-14163512	6.1	ENSMUSG00000020173	1697097	ENSMUSG00000048834	2094213	0.28	-0.2	0.3159	5	3.4	greenyellow	7.2	0.5841	EMPTY	0.02	0.14	0.12	0.4	0.04	Gm12005	FALSE	FALSE	FALSE	TRUE	TRUE	FALSE
NONCO1306	chr1:109833393-109833789	0.6	ENSMUSG00000026315	2222910	ENSMUSG00000026312	148643	0.23	-0.06	TRUE	NONCO1306	chr1:109833393-109833789	0.6	ENSMUSG00000026315	2222910	ENSMUSG00000026312	148643	0.23	-0.06	0.031	16	32.1	darkgreen	4.1	0.0017	EMPTY	0.99	0.02	61	0.15	6.64	EMPTY	FALSE	FALSE	FALSE	FALSE	FALSE	FALSE
NONCO13064	chr11:19716564-19721589	21.8	ENSMUSG00000020160	697580	ENSMUSG00000045671	202787	-0.37	0.18	FALSE	NONCO13064	chr11:19716564-19721589	21.8	ENSMUSG00000020160	697580	ENSMUSG00000045671	202787	-0.37	0.18	0.1817	2	13.1	midnightblue	1.7	NA	ENSG00000253377	0.9	0.04	21.51	0.12	7.65	Glns-ps1	FALSE	FALSE	FALSE	TRUE	TRUE	FALSE
NONCO13065	chr11:19804872-19849680	0.2	ENSMUSG00000020160	785888	ENSMUSG00000045671	74696	0.19	0.26	FALSE	NONCO13065	chr11:19804872-19849680	0.2	ENSMUSG00000020160	785888	ENSMUSG00000045671	74696	0.19	0.26	0.1619	20	80787.2	turquoise	2.6	0.0558	ENSG00000253377	0.97	0.04	23.25	0.06	16.83	EMPTY	FALSE	FALSE	FALSE	FALSE	FALSE	FALSE
NONCO13073	chr11:20036688-20040901	1.3	ENSMUSG00000045671	12663	ENSMUSG00000020152	21404	-0.18	0.29	FALSE	NONCO13073	chr11:20036688-20040901	1.3	ENSMUSG00000045671	12663	ENSMUSG00000020152	21404	-0.18	0.29	1	15	387327	blue	12.7	0.0444	EMPTY	EMPTY	EMPTY	EMPTY	EMPTY	EMPTY	EMPTY	FALSE	FALSE	FALSE	FALSE	FALSE	FALSE
NONCO13075	chr11:20137245-20139379	0.2	ENSMUSG00000020152	24333	ENSMUSG00000020149	62054	-0.31	-0.31	FALSE	NONCO13075	chr11:20137245-20139379	0.2	ENSMUSG00000020152	24333	ENSMUSG00000020149	62054	-0.31	-0.31	1	17	19371.6	turquoise	1	NA	EMPTY	EMPTY	EMPTY	EMPTY	EMPTY	EMPTY	EMPTY	FALSE	FALSE	FALSE	FALSE	FALSE	FALSE
NONCO13077	chr11:20145379-20173642	11.2	ENSMUSG00000020152	32467	ENSMUSG00000020149	27791	0.79	0.19	FALSE	NONCO13077	chr11:20145379-20173642	11.2	ENSMUSG00000020152	32467	ENSMUSG00000020149	27791	0.79	0.19	0.3708	4	4.5	brown	48.3	0.0512	EMPTY	0.19	0.14	1.34	0.07	2.6	Gm12031	TRUE	FALSE	TRUE	TRUE	FALSE	FALSE
NONCO13078	chr11:20180631-20185460	0.1	ENSMUSG00000020152	67719	ENSMUSG00000020149	15973	0.74	0.46	FALSE	NONCO13078	chr11:20180631-20185460	0.1	ENSMUSG00000020152	67719	ENSMUSG00000020149	15973	0.74	0.46	0.1539	9	20.7	brown	3.8	0.0592	EMPTY	EMPTY	EMPTY	EMPTY	EMPTY	EMPTY	EMPTY	FALSE	FALSE	FALSE	FALSE	FALSE	TRUE
NONCO13079	chr11:20355937-20380336	8.1	ENSMUSG00000020142	23225	ENSMUSG00000049800	162918	0.19	0.11	FALSE	NONCO13079	chr11:20355937-20380336	8.1	ENSMUSG00000020142	23225	ENSMUSG00000049800	162918	0.19	0.11	1	5	2.3	brown	51.4	0.8422	ENSG00000272375	0.12	0.14	0.85	0.01	8.82	EMPTY	FALSE	FALSE	FALSE	TRUE	FALSE	TRUE
NONCO1308	chr1:111881025-111900648	2.5	ENSMUSG00000038702	16108	ENSMUSG00000070695	3784109	-0.2	-0.38	FALSE	NONCO1308	chr1:111881025-111900648	2.5	ENSMUSG00000038702	16108	ENSMUSG00000070695	3784109	-0.2	-0.38	0.0795	8	3.2	midnightblue	12.1	0.1518	EMPTY	0.01	0.01	1.27	0.19	0.06	Gm6028	FALSE	FALSE	FALSE	FALSE	TRUE	FALSE
NONCO1309	chr1:112381253-112416932	0.7	ENSMUSG00000038702	516336	ENSMUSG00000070695	3267825	-0.26	-0.07	FALSE	NONCO1309	chr1:112381253-112416932	0.7	ENSMUSG00000038702	516336	ENSMUSG00000070695	3267825	-0.26	-0.07	1	13	8.3	darkorange	4.2	0.9084	EMPTY	0	0.69	0	0	0	Gm18406	FALSE	TRUE	FALSE	TRUE	FALSE	FALSE
NONCO1310	chr1:113903994-113905938	4.8	ENSMUSG00000038702	2039077	ENSMUSG00000070695	1778819	-0.24	-0.22	FALSE	NONCO1310	chr1:113903994-113905938	4.8	ENSMUSG00000038702	2039077	ENSMUSG00000070695	1778819	-0.24	-0.22	0.4325	8	4.3	greenyellow	14.1	0.2601	EMPTY	EMPTY	EMPTY	EMPTY	EMPTY	EMPTY	EMPTY	FALSE	FALSE	FALSE	TRUE	FALSE	FALSE
NONCO1311	chr1:113888908-113964253	54	ENSMUSG00000038702	2023991	ENSMUSG00000070695	1720504	-0.24	-0.03	FALSE	NONCO1311	chr1:113888908-113964253	54	ENSMUSG00000038702	2023991	ENSMUSG00000070695	1720504	-0.24	-0.03	0.4325	4	3.3	violet	484.3	0.0149	EMPTY	EMPTY	EMPTY	EMPTY	EMPTY	EMPTY	9330185C12Rik	FALSE	FALSE	FALSE	TRUE	FALSE	FALSE
NONCO1312	chr1:113898670-113908509	8.6	ENSMUSG00000038702	2033753	ENSMUSG00000070695	1776248	-0.41	0.31	FALSE	NONCO1312	chr1:113898670-113908509	8.6	ENSMUSG00000038702	2033753	ENSMUSG00000070695	1776248	-0.41	0.31	0.4726	6	6.2	brown	8.8	0.3384	EMPTY	EMPTY	EMPTY	EMPTY	EMPTY	EMPTY	EMPTY	FALSE	FALSE	FALSE	FALSE	FALSE	FALSE
NONCO1313	chr1:115219137-115219759	0.5	ENSMUSG00000038702	3354220	ENSMUSG00000070695	464998	-0.22	-0.08	FALSE	NONCO1313	chr1:115219137-115219759	0.5	ENSMUSG00000038702	3354220	ENSMUSG00000070695	464998	-0.22	-0.08	1	9	23464.9	darkgreen	1	NA	EMPTY	0.98	0.04	25.27	0.19	5.06	Gm4854	FALSE	FALSE	FALSE	FALSE	TRUE	FALSE
NONCO13151	chr11:31694180-31703584	2.5	ENSMUSG00000044502	22296	ENSMUSG00000020300	168628	0.07	0.1	FALSE	NONCO13151	chr11:31694180-31703584	2.5	ENSMUSG00000044502	22296	ENSMUSG00000020300	168628	0.07	0.1	1	13	4.3	blue	9.8	0.8829	EMPTY	0.07	0	20.39	0.03	2.49	EMPTY	FALSE	FALSE	FALSE	FALSE	FALSE	FALSE
NONCO13152	chr11:31712026-31824556	2.5	ENSMUSG00000044502	40142	ENSMUSG00000020300	47656	-0.26	0	FALSE	NONCO13152	chr11:31712026-31824556	2.5	ENSMUSG00000044502	40142	ENSMUSG00000020300	47656	-0.26	0	0.0759	22	8.9	turquoise	16.2	0.1723	EMPTY	0.01	0.1	0.08	0.25	0.03	D630024D03Rik	TRUE	FALSE	FALSE	TRUE	FALSE	FALSE
NONCO1316	chr1:115677488-115678880	0.2	ENSMUSG00000038702	3812571	ENSMUSG00000070695	5877	0.24	0.33	FALSE	NONCO1316	chr1:115677488-115678880	0.2	ENSMUSG00000038702	3812571	ENSMUSG00000070695	5877	0.24	0.33	0.2156	20	35648.3	turquoise	1.7	NA	EMPTY	0.02	0.02	1.1	0.38	0.06	EMPTY	FALSE	FALSE	FALSE	FALSE	FALSE	FALSE
NONCO13160	chr11:32126284-32136198	2.9	ENSMUSG00000020297	67083	ENSMUSG00000020279	51344	EMPTY	EMPTY	FALSE	NONCO13160	chr11:32126284-32136198	2.9	ENSMUSG00000020297	67083	ENSMUSG00000020279	51344	EMPTY	EMPTY	1	9	6.6	turquoise	12.2	0.6396	EMPTY	0.26	0.35	0.73	0.03	8.25	EMPTY	FALSE	FALSE	TRUE	TRUE	FALSE	FALSE
NONCO13171	chr11:33172764-33173501	91.8	ENSMUSG00000057113	9559	ENSMUSG00000040610	27252	EMPTY	EMPTY	FALSE	NONCO13171	chr11:33172764-33173501	91.8	ENSMUSG00000057113	9559	ENSMUSG00000040610	27252	EMPTY	EMPTY	0.2287	9	2.9	brown	158.7	0	EMPTY	0.67	0.15	4.54	0.87	0.78	Gm12115	FALSE	FALSE	FALSE	FALSE	TRUE	FALSE
NONCO13197	chr11:41498676-41500934	60.9	ENSMUSG00000020326	743366	ENSMUSG00000020436	409270	-0.34	0	FALSE	NONCO13197	chr11:41498676-41500934	60.9	ENSMUSG00000020326	743366	ENSMUSG00000020436	409270	-0.34	0	0.5782	4	1.4	brown	149.5	0.7794	EMPTY	0.88	0.9	0.98	0.19	4.53	Gm12141	FALSE	FALSE	FALSE	TRUE	TRUE	FALSE
NONCO13225	chr11:46727786-46728747	457.4	ENSMUSG00000040413	20726	ENSMUSG00000040405	6334	EMPTY	EMPTY	FALSE	NONCO13225	chr11:46727786-46728747	457.4	ENSMUSG00000040413	20726	ENSMUSG00000040405	6334	EMPTY	EMPTY	0.0661	4	3.7	midnightblue	2532.2	0	EMPTY	0.88	0.01	61.51	0.19	4.51	Gm12174	FALSE	FALSE	FALSE	TRUE	TRUE	FALSE
NONCO1324	chr1:119337410-119338422	1.3	ENSMUSG00000048402	283792	ENSMUSG00000037035	77044	0.61	-0.49	FALSE	NONCO1324	chr1:119337410-119338422	1.3	ENSMUSG00000048402	283792	ENSMUSG00000037035	77044	0.61	-0.49	0.4325	18	331753	blue	11.3	0.0886	EMPTY	EMPTY	EMPTY	EMPTY	EMPTY	EMPTY	Gm29455	FALSE	FALSE	FALSE	FALSE	FALSE	FALSE
NONCO13242	chr11:50119096-50126341	26.1	ENSMUSG00000020376	14339	ENSMUSG00000036644	5056	-0.19	-0.32	FALSE	NONCO13242	chr11:50119096-50126341	26.1	ENSMUSG00000020376	14339	ENSMUSG00000036644	5056	-0.19	-0.32	0.5782	21	2.9	turquoise	1133.7	0.0063	EMPTY	0.09	0.14	0.64	0.52	0.18	EMPTY	FALSE	FALSE	FALSE	TRUE	FALSE	FALSE
NONCO13280	chr11:53200659-53201238	14.2	ENSMUSG00000036264	12122	ENSMUSG00000020361	58577	0.28	-0.75	TRUE	NONCO13280	chr11:53200659-53201238	14.2	ENSMUSG00000036264	12122	ENSMUSG00000020361	58577	0.28	-0.75	0.0084	17	8.3	darkgreen	12.3	0.0003	EMPTY	0.11	0.63	0.17	0.47	0.24	Gm11189	FALSE	FALSE	FALSE	TRUE	FALSE	FALSE
NONCO13287	chr11:53500667-53510465	0.5	ENSMUSG00000054450	19571	ENSMUSG00000018398	8793	0.37	-0.17	FALSE	NONCO13287	chr11:53500667-53510465	0.5	ENSMUSG00000054450	19571	ENSMUSG00000018398	8793	0.37	-0.17	0.4073	17	155136	darkgreen	5	0.164	EMPTY	0.2	0.14	1.42	0.15	1.36	Rpl9-ps3	FALSE	FALSE	FALSE	TRUE	TRUE	FALSE
NONCO13309	chr11:56659512-56747678	0.4	ENSMUSG00000037393	618503	ENSMUSG00000020524	263710	0.07	-0.1	FALSE	NONCO13309	chr11:56659512-56747678	0.4	ENSMUSG00000037393	618503	ENSMUSG00000020524	263710	0.07	-0.1	0.6669	16	29959.3	blue	1.1	NA	EMPTY	0.06	0.49	0.12	0.01	5.17	EMPTY	FALSE	FALSE	FALSE	FALSE	FALSE	FALSE
NONCO1337	chr1:124283355-124436062	0.6	ENSMUSG00000036815	237797	ENSMUSG00000026341	956844	0.2	-0.18	FALSE	NONCO1337	chr1:124283355-124436062	0.6	ENSMUSG00000036815	237797	ENSMUSG00000026341	956844	0.2	-0.18	1	17	17783.6	turquoise	0.8	NA	EMPTY	0	0.14	0.01	0.01	0.14	EMPTY	FALSE	FALSE	FALSE	FALSE	FALSE	FALSE
NONCO1338	chr1:124633505-124846152	4.5	ENSMUSG00000036815	587947	ENSMUSG00000026341	546754	0.27	-0.23	FALSE	NONCO1338	chr1:124633505-124846152	4.5	ENSMUSG00000036815	587947	ENSMUSG00000026341	546754	0.27	-0.23	1	20	23934.8	brown	1.1	NA	EMPTY	0.16	0.14	1.11	0.27	0.59	Gm28928	FALSE	TRUE	FALSE	TRUE	FALSE	FALSE
NONCO13382	chr11:62918864-62921592	1.4	ENSMUSG00000014177	2085	ENSMUSG00000042200	29602	EMPTY	EMPTY	FALSE	NONCO13382	chr11:62918864-62921592	1.4	ENSMUSG00000014177	2085	ENSMUSG00000042200	29602	EMPTY	EMPTY	0.9417	4	22.2	lightyellow	17.1	0.3766	EMPTY	0.03	0.11	0.25	0.08	0.33	Tvp23bos	TRUE	FALSE	FALSE	TRUE	FALSE	FALSE
NONCO13389	chr11:64362407-64379469	2.8	ENSMUSG00000042148	282940	ENSMUSG00000095224	55688	EMPTY	EMPTY	TRUE	NONCO13389	chr11:64362407-64379469	2.8	ENSMUSG00000042148	282940	ENSMUSG00000095224	55688	EMPTY	EMPTY	0.0307	16	609677	darkgreen	24	0.0008	EMPTY	0.33	0.11	2.91	0	89.32	EMPTY	FALSE	FALSE	FALSE	FALSE	FALSE	TRUE
NONCO13395	chr11:65277118-65365798	0.1	ENSMUSG00000020542	7130	ENSMUSG00000033352	322446	0.24	0.26	FALSE	NONCO13395	chr11:65277118-65365798	0.1	ENSMUSG00000020542	7130	ENSMUSG00000033352	322446	0.24	0.26	0.7666	20	95759.9	turquoise	5	0.2437	EMPTY	0.04	0.39	0.11	0.57	0.08	Gm12295	TRUE	FALSE	FALSE	TRUE	FALSE	FALSE
NONCO13419	chr11:69258141-69262046	0.3	ENSMUSG00000020890	21106	ENSMUSG00000032782	37442	-0.11	0.15	FALSE	NONCO13419	chr11:69258141-69262046	0.3	ENSMUSG00000020890	21106	ENSMUSG00000032782	37442	-0.11	0.15	0.2979	22	186993	lightyellow	5.5	0.271	EMPTY	0.07	0.94	0.07	0.12	0.54	EMPTY	FALSE	FALSE	FALSE	FALSE	FALSE	FALSE
NONCO13432	chr11:70377171-70381953	1.8	ENSMUSG00000018924	25141	ENSMUSG00000018921	10931	EMPTY	EMPTY	FALSE	NONCO13432	chr11:70377171-70381953	1.8	ENSMUSG00000018924	25141	ENSMUSG00000018921	10931	EMPTY	EMPTY	0.0954	0	10.7	turquoise	98.6	0.0151	ENSG00000260450	0.09	0	115.12	0.17	0.52	EMPTY	FALSE	FALSE	FALSE	TRUE	FALSE	FALSE
NONCO13450	chr11:71647076-71658486	0.5	ENSMUSG00000070390	416344	ENSMUSG00000020811	91435	EMPTY	EMPTY	FALSE	NONCO13450	chr11:71647076-71658486	0.5	ENSMUSG00000070390	416344	ENSMUSG00000020811	91435	EMPTY	EMPTY	0.3482	0	11.3	brown	10.7	0.2378	ENSG00000261751	EMPTY	EMPTY	EMPTY	EMPTY	EMPTY	Gm12324	TRUE	TRUE	TRUE	TRUE	FALSE	FALSE
NONCO13451	chr11:71739272-71740574	5.5	ENSMUSG00000070390	508540	ENSMUSG00000020811	9347	EMPTY	EMPTY	FALSE	NONCO13451	chr11:71739272-71740574	5.5	ENSMUSG00000070390	508540	ENSMUSG00000020811	9347	EMPTY	EMPTY	0.254	22	3.7	blue	44.7	0.5666	EMPTY	0.02	0.01	3.63	0.01	1.26	Gm12326	TRUE	FALSE	TRUE	TRUE	FALSE	FALSE
NONCO1347	chr1:127850229-127854880	10	ENSMUSG00000051590	9909	ENSMUSG00000036104	13894	EMPTY	EMPTY	TRUE	NONCO1347	chr1:127850229-127854880	10	ENSMUSG00000051590	9909	ENSMUSG00000036104	13894	EMPTY	EMPTY	0.0377	4	10.8	darkmagenta	55.6	0.0003	EMPTY	0.43	0.21	2.03	0.22	1.98	EMPTY	FALSE	FALSE	FALSE	FALSE	FALSE	FALSE
NONCO13497	chr11:75719309-75721783	1.2	ENSMUSG00000017776	12402	ENSMUSG00000020849	11087	0.16	0.55	FALSE	NONCO13497	chr11:75719309-75721783	1.2	ENSMUSG00000017776	12402	ENSMUSG00000020849	11087	0.16	0.55	0.4726	21	732271	darkorange	22.1	0.0003	EMPTY	EMPTY	EMPTY	EMPTY	EMPTY	EMPTY	EMPTY	FALSE	FALSE	FALSE	FALSE	FALSE	FALSE
NONCO13501	chr11:75963671-75967183	1.2	ENSMUSG00000020847	25243	ENSMUSG00000053783	32730	-0.01	-0.11	FALSE	NONCO13501	chr11:75963671-75967183	1.2	ENSMUSG00000020847	25243	ENSMUSG00000053783	32730	-0.01	-0.11	1	13	6	darkgreen	2.9	0.9757	EMPTY	0.39	0	452.28	0.14	2.78	EMPTY	FALSE	FALSE	FALSE	TRUE	FALSE	FALSE
NONCO13544	chr11:78787947-78796492	1	ENSMUSG00000049489	36219	ENSMUSG00000072640	30093	EMPTY	EMPTY	FALSE	NONCO13544	chr11:78787947-78796492	1	ENSMUSG00000049489	36219	ENSMUSG00000072640	30093	EMPTY	EMPTY	1	15	84291.9	paleturquoise	4.9	0.3432	EMPTY	0.21	0.14	1.45	0.19	1.06	EMPTY	FALSE	TRUE	FALSE	FALSE	FALSE	FALSE
NONCO13567	chr11:80408198-80412495	8	ENSMUSG00000017421	2466	ENSMUSG00000017428	16121	0.25	-0.11	FALSE	NONCO13567	chr11:80408198-80412495	8	ENSMUSG00000017421	2466	ENSMUSG00000017428	16121	0.25	-0.11	1	7	3.2	darkorange	166.2	0.0856	EMPTY	0.18	0	61.92	0.09	2.14	EMPTY	FALSE	FALSE	FALSE	FALSE	FALSE	FALSE
NONCO13570	chr11:80417733-80422699	2.4	ENSMUSG00000017421	12001	ENSMUSG00000017428	5917	-0.08	-0.01	FALSE	NONCO13570	chr11:80417733-80422699	2.4	ENSMUSG00000017421	12001	ENSMUSG00000017428	5917	-0.08	-0.01	0.2156	4	4.8	midnightblue	20	0.3588	EMPTY	0.18	0.07	2.69	0.07	2.46	EMPTY	FALSE	FALSE	FALSE	FALSE	FALSE	FALSE
NONCO13583	chr11:81979487-81980932	1.8	ENSMUSG00000020704	11031	ENSMUSG00000092157	47293	EMPTY	EMPTY	FALSE	NONCO13583	chr11:81979487-81980932	1.8	ENSMUSG00000020704	11031	ENSMUSG00000092157	47293	EMPTY	EMPTY	0.1619	1	25.5	brown	26.3	0	EMPTY	0.01	0.1	0.13	0	4.27	EMPTY	FALSE	FALSE	FALSE	FALSE	FALSE	FALSE
NONCO13597	chr11:83800446-83801571	19.5	ENSMUSG00000000976	16693	ENSMUSG00000020679	48493	0.13	-0.33	FALSE	NONCO13597	chr11:83800446-83801571	19.5	ENSMUSG00000000976	16693	ENSMUSG00000020679	48493	0.13	-0.33	0.193	14	3.2	lightcyan	25.2	0.0409	EMPTY	0.04	0.01	3.07	0.02	1.53	Gm11434	FALSE	FALSE	FALSE	TRUE	TRUE	FALSE
NONCO13608	chr11:84716976-84722849	0.4	ENSMUSG00000018698	191442	ENSMUSG00000018405	90213	0.34	-0.26	FALSE	NONCO13608	chr11:84716976-84722849	0.4	ENSMUSG00000018698	191442	ENSMUSG00000018405	90213	0.34	-0.26	1	9	35282.4	lightyellow	1.4	NA	EMPTY	1	0.49	2.04	0.15	6.63	1700109G15Rik	TRUE	FALSE	FALSE	TRUE	FALSE	FALSE
NONCO13611	chr11:84942716-84944488	0.3	ENSMUSG00000020526	26351	ENSMUSG00000000805	13299	-0.07	0.16	FALSE	NONCO13611	chr11:84942716-84944488	0.3	ENSMUSG00000020526	26351	ENSMUSG00000000805	13299	-0.07	0.16	0.7225	19	125536	white	6	0.0033	EMPTY	0.02	0.07	0.23	0.08	0.21	EMPTY	FALSE	FALSE	FALSE	FALSE	FALSE	FALSE
NONCO13624	chr11:86825076-86828482	3.7	ENSMUSG00000018425	17331	ENSMUSG00000018427	107944	0.05	-0.23	FALSE	NONCO13624	chr11:86825076-86828482	3.7	ENSMUSG00000018425	17331	ENSMUSG00000018427	107944	0.05	-0.23	0.6291	4	130152	brown	3	0.1206	ENSG00000260983	0.05	0.14	0.32	0.27	0.17	EMPTY	FALSE	FALSE	FALSE	TRUE	FALSE	FALSE
NONCO1363	chr1:130528492-130529607	2.2	ENSMUSG00000026399	65749	ENSMUSG00000042554	47107	EMPTY	EMPTY	FALSE	NONCO1363	chr1:130528492-130529607	2.2	ENSMUSG00000026399	65749	ENSMUSG00000042554	47107	EMPTY	EMPTY	1	20	2.9	brown	9.7	0.8734	EMPTY	EMPTY	EMPTY	EMPTY	EMPTY	EMPTY	Gm16083	FALSE	FALSE	FALSE	FALSE	FALSE	FALSE
NONCO13640	chr11:87944787-87946513	1.2	ENSMUSG00000060787	28103	ENSMUSG00000020483	33013	-0.24	0.44	TRUE	NONCO13640	chr11:87944787-87946513	1.2	ENSMUSG00000060787	28103	ENSMUSG00000020483	33013	-0.24	0.44	0.0069	8	16	midnightblue	3.9	0.0308	EMPTY	0.53	0.01	71.02	0.09	6.13	EMPTY	FALSE	FALSE	FALSE	FALSE	FALSE	FALSE
NONCO13641	chr11:87972887-87973344	0.6	ENSMUSG00000060787	56203	ENSMUSG00000020483	6182	0.12	-0.26	FALSE	NONCO13641	chr11:87972887-87973344	0.6	ENSMUSG00000060787	56203	ENSMUSG00000020483	6182	0.12	-0.26	1	20	77164.5	yellowgreen	2.7	0.1293	EMPTY	0.05	1	0.05	0.09	0.6	EMPTY	FALSE	FALSE	FALSE	FALSE	FALSE	FALSE
NONCO13644	chr11:88010762-88041545	1.3	ENSMUSG00000020483	23230	ENSMUSG00000018379	5829	-0.17	-0.11	FALSE	NONCO13644	chr11:88010762-88041545	1.3	ENSMUSG00000020483	23230	ENSMUSG00000018379	5829	-0.17	-0.11	1	22	10.6	darkorange	7.9	0.3523	EMPTY	0.04	0.2	0.17	0.18	0.19	EMPTY	FALSE	FALSE	FALSE	FALSE	FALSE	TRUE
NONCO13645	chr11:88029080-88029832	2.1	ENSMUSG00000020483	41548	ENSMUSG00000018379	17542	-0.11	-0.14	FALSE	NONCO13645	chr11:88029080-88029832	2.1	ENSMUSG00000020483	41548	ENSMUSG00000018379	17542	-0.11	-0.14	1	9	24.7	greenyellow	9.2	0.3131	EMPTY	EMPTY	EMPTY	EMPTY	EMPTY	EMPTY	EMPTY	FALSE	FALSE	FALSE	FALSE	FALSE	FALSE
NONCO13646	chr11:88038470-88039335	3	ENSMUSG00000020483	50938	ENSMUSG00000018379	8039	0.43	0.56	FALSE	NONCO13646	chr11:88038470-88039335	3	ENSMUSG00000020483	50938	ENSMUSG00000018379	8039	0.43	0.56	1	9	18.2	brown	20.3	0.4989	ENSG00000260896	0.12	0.14	0.82	0.16	0.75	EMPTY	FALSE	FALSE	FALSE	FALSE	FALSE	FALSE
NONCO13656	chr11:88249390-88254351	34.4	ENSMUSG00000023723	37884	ENSMUSG00000034031	39708	EMPTY	EMPTY	TRUE	NONCO13656	chr11:88249390-88254351	34.4	ENSMUSG00000023723	37884	ENSMUSG00000034031	39708	EMPTY	EMPTY	0.031	6	8.8	midnightblue	101.1	0	EMPTY	0.02	0	Inf	0.45	0.04	EMPTY	FALSE	FALSE	FALSE	TRUE	FALSE	FALSE
NONCO13676	chr11:89721047-89735146	0.4	ENSMUSG00000047773	81417	ENSMUSG00000020553	247520	-0.08	-0.04	FALSE	NONCO13676	chr11:89721047-89735146	0.4	ENSMUSG00000047773	81417	ENSMUSG00000020553	247520	-0.08	-0.04	1	7	114069	brown4	3.4	0.1258	EMPTY	0.04	0.01	2.95	0.09	0.39	EMPTY	FALSE	FALSE	FALSE	FALSE	FALSE	FALSE
NONCO13697	chr11:94139289-94189976	0.3	ENSMUSG00000020859	13205	ENSMUSG00000037573	21479	0.64	-0.1	FALSE	NONCO13697	chr11:94139289-94189976	0.3	ENSMUSG00000020859	13205	ENSMUSG00000037573	21479	0.64	-0.1	0.4325	0	53.6	darkred	4.2	0.5423	EMPTY	0.12	0	1021.71	0.02	6.5	EMPTY	FALSE	FALSE	FALSE	FALSE	FALSE	FALSE
NONCO13698	chr11:94139981-94158364	1.8	ENSMUSG00000020859	13897	ENSMUSG00000037573	53091	0.12	-0.43	FALSE	NONCO13698	chr11:94139981-94158364	1.8	ENSMUSG00000020859	13897	ENSMUSG00000037573	53091	0.12	-0.43	1	17	91354.6	orange	6.1	0.2512	EMPTY	0.01	0.04	0.15	0.37	0.01	EMPTY	FALSE	FALSE	FALSE	FALSE	FALSE	FALSE
NONCO1370	chr1:132104634-132106296	0.4	ENSMUSG00000059149	36573	ENSMUSG00000026437	5942	-0.24	0.03	FALSE	NONCO1370	chr1:132104634-132106296	0.4	ENSMUSG00000059149	36573	ENSMUSG00000026437	5942	-0.24	0.03	1	13	48.9	brown4	7.9	NA	EMPTY	0.25	0.14	1.73	0.19	1.27	EMPTY	FALSE	FALSE	TRUE	FALSE	FALSE	FALSE
NONCO13700	chr11:94271426-94277104	3.6	ENSMUSG00000044177	25422	ENSMUSG00000094091	7549	EMPTY	EMPTY	FALSE	NONCO13700	chr11:94271426-94277104	3.6	ENSMUSG00000044177	25422	ENSMUSG00000094091	7549	EMPTY	EMPTY	1	13	3.7	greenyellow	31.3	0.7463	EMPTY	0	0.11	0.02	0.05	0.03	EMPTY	FALSE	TRUE	FALSE	TRUE	FALSE	FALSE
NONCO13708	chr11:94736434-94736738	0.1	ENSMUSG00000056008	31936	ENSMUSG00000020870	5045	EMPTY	EMPTY	FALSE	NONCO13708	chr11:94736434-94736738	0.1	ENSMUSG00000056008	31936	ENSMUSG00000020870	5045	EMPTY	EMPTY	1	0	42633.4	blue	1.2	NA	EMPTY	0.22	0.08	2.67	0.07	3.05	EMPTY	FALSE	FALSE	FALSE	FALSE	FALSE	FALSE
NONCO13726	chr11:95854724-95859088	2.6	ENSMUSG00000038811	8991	ENSMUSG00000013418	6856	0.27	-0.13	FALSE	NONCO13726	chr11:95854724-95859088	2.6	ENSMUSG00000038811	8991	ENSMUSG00000013418	6856	0.27	-0.13	0.8278	2	7	brown	6.4	0.4535	EMPTY	0.04	0.29	0.12	0.22	0.16	4833417C18Rik,Gm11527	FALSE	FALSE	TRUE	TRUE	FALSE	TRUE
NONCO13738	chr11:96991920-96997720	4.8	ENSMUSG00000018678	8962	ENSMUSG00000038560	15675	EMPTY	EMPTY	TRUE	NONCO13738	chr11:96991920-96997720	4.8	ENSMUSG00000018678	8962	ENSMUSG00000038560	15675	EMPTY	EMPTY	0.0214	8	6.4	midnightblue	60.6	0.0021	EMPTY	0.59	0.22	2.67	0.07	8.03	EMPTY	FALSE	FALSE	FALSE	TRUE	FALSE	FALSE
NONCO13742	chr11:97301821-97310373	1.2	ENSMUSG00000001441	21184	ENSMUSG00000018882	5344	-0.2	-0.06	FALSE	NONCO13742	chr11:97301821-97310373	1.2	ENSMUSG00000001441	21184	ENSMUSG00000018882	5344	-0.2	-0.06	1	11	212153	greenyellow	9.2	0.1279	EMPTY	0.04	0.02	2.74	0.18	0.23	EMPTY	FALSE	FALSE	TRUE	TRUE	FALSE	FALSE
NONCO13776	chr11:99188638-99200166	0.5	ENSMUSG00000037944	33562	ENSMUSG00000037935	8882	EMPTY	EMPTY	FALSE	NONCO13776	chr11:99188638-99200166	0.5	ENSMUSG00000037944	33562	ENSMUSG00000037935	8882	EMPTY	EMPTY	1	11	234346	darkred	7.9	0.067	EMPTY	0.03	0.02	1.44	0.41	0.08	EMPTY	FALSE	FALSE	FALSE	TRUE	FALSE	FALSE
NONCO13777	chr11:99394927-99396972	1.7	ENSMUSG00000019761	5564	ENSMUSG00000020912	18695	-0.48	0.19	FALSE	NONCO13777	chr11:99394927-99396972	1.7	ENSMUSG00000019761	5564	ENSMUSG00000020912	18695	-0.48	0.19	0.5013	18	8.2	paleturquoise	11.2	0.6128	EMPTY	0.17	0	173.95	0.17	1.02	EMPTY	FALSE	FALSE	FALSE	FALSE	FALSE	FALSE
NONCO13812	chr11:102614892-102624366	0	ENSMUSG00000050288	6835	ENSMUSG00000051455	39351	-0.22	0.42	FALSE	NONCO13812	chr11:102614892-102624366	0	ENSMUSG00000050288	6835	ENSMUSG00000051455	39351	-0.22	0.42	1	13	11.6	darkred	4.6	0.8215	EMPTY	0.93	0.36	2.6	0.06	16.9	2810433D01Rik,Gm11636	TRUE	FALSE	TRUE	TRUE	FALSE	FALSE
NONCO13813	chr11:102710867-102711587	0.8	ENSMUSG00000020925	13086	ENSMUSG00000020926	49853	0.13	0.04	FALSE	NONCO13813	chr11:102710867-102711587	0.8	ENSMUSG00000020925	13086	ENSMUSG00000020926	49853	0.13	0.04	1	20	8.6	turquoise	6.5	0.7658	EMPTY	0.11	0.39	0.29	0.05	2.42	EMPTY	FALSE	FALSE	FALSE	FALSE	FALSE	FALSE
NONCO13818	chr11:102958300-102967121	58.8	ENSMUSG00000045532	11613	ENSMUSG00000020935	26927	0.17	-0.54	FALSE	NONCO13818	chr11:102958300-102967121	58.8	ENSMUSG00000045532	11613	ENSMUSG00000020935	26927	0.17	-0.54	0.0548	4	3.5	midnightblue	428.6	0	EMPTY	0.92	1	0.92	0.08	12.25	2410004I01Rik	TRUE	TRUE	FALSE	TRUE	FALSE	FALSE
NONCO13830	chr11:103960711-103961378	1.3	ENSMUSG00000034187	6656	ENSMUSG00000062421	5362	-0.31	-0.13	FALSE	NONCO13830	chr11:103960711-103961378	1.3	ENSMUSG00000034187	6656	ENSMUSG00000062421	5362	-0.31	-0.13	1	5	41.6	greenyellow	5.7	0.6533	EMPTY	0.1	0.32	0.3	0.1	1.01	EMPTY	FALSE	FALSE	FALSE	FALSE	FALSE	TRUE
NONCO13832	chr11:104072739-104089542	0.8	ENSMUSG00000062421	87403	ENSMUSG00000018634	43314	-0.42	0.36	TRUE	NONCO13832	chr11:104072739-104089542	0.8	ENSMUSG00000062421	87403	ENSMUSG00000018634	43314	-0.42	0.36	0.0102	13	65.9	darkgreen	39.5	0	EMPTY	0.12	0.02	5.81	0.14	0.86	EMPTY	FALSE	FALSE	FALSE	FALSE	FALSE	FALSE
NONCO1390	chr1:133534438-133543146	1.3	ENSMUSG00000070643	110062	ENSMUSG00000090553	60726	-0.21	-0.2	FALSE	NONCO1390	chr1:133534438-133543146	1.3	ENSMUSG00000070643	110062	ENSMUSG00000090553	60726	-0.21	-0.2	1	16	23.6	darkred	5.5	0.5411	EMPTY	0.05	0.27	0.2	0.1	0.51	EMPTY	FALSE	FALSE	FALSE	FALSE	FALSE	FALSE
NONCO13906	chr11:109854982-109868899	0.9	ENSMUSG00000020617	26937	ENSMUSG00000020620	63292	EMPTY	EMPTY	FALSE	NONCO13906	chr11:109854982-109868899	0.9	ENSMUSG00000020617	26937	ENSMUSG00000020620	63292	EMPTY	EMPTY	0.4726	20	100346	greenyellow	2.8	0.1937	EMPTY	EMPTY	EMPTY	EMPTY	EMPTY	EMPTY	EMPTY	FALSE	FALSE	FALSE	FALSE	FALSE	FALSE
NONCO1391	chr1:133981560-133982506	0.7	ENSMUSG00000041577	60147	ENSMUSG00000041559	54749	0.39	0.42	FALSE	NONCO1391	chr1:133981560-133982506	0.7	ENSMUSG00000041577	60147	ENSMUSG00000041559	54749	0.39	0.42	1	15	4.3	turquoise	8.5	0.898	EMPTY	0.23	0.08	2.84	0.13	1.87	EMPTY	FALSE	FALSE	FALSE	FALSE	FALSE	FALSE
NONCO13914	chr11:111276033-111277004	8.5	ENSMUSG00000041695	199213	ENSMUSG00000000567	1505221	0.08	-0.22	FALSE	NONCO13914	chr11:111276033-111277004	8.5	ENSMUSG00000041695	199213	ENSMUSG00000000567	1505221	0.08	-0.22	1	13	2.3	salmon4	34.6	0.2649	EMPTY	0.41	0.51	0.8	0.1	4.19	Gm11675	FALSE	FALSE	FALSE	TRUE	TRUE	FALSE
NONCO13915	chr11:111510345-111512458	3	ENSMUSG00000041695	433525	ENSMUSG00000000567	1269767	0.35	-0.03	FALSE	NONCO13915	chr11:111510345-111512458	3	ENSMUSG00000041695	433525	ENSMUSG00000000567	1269767	0.35	-0.03	0.1539	0	4.3	turquoise	32.6	0.615	EMPTY	0	0.01	0.41	0.07	0.03	EMPTY	FALSE	TRUE	FALSE	TRUE	FALSE	FALSE
NONCO13920	chr11:113043866-113201907	5.1	ENSMUSG00000000567	256107	ENSMUSG00000041654	42947	0.15	-0.15	FALSE	NONCO13920	chr11:113043866-113201907	5.1	ENSMUSG00000000567	256107	ENSMUSG00000041654	42947	0.15	-0.15	1	13	1.9	greenyellow	13.2	0.9828	ENSG00000245857	0.04	0.01	7.66	0.03	1.25	2610035D17Rik	TRUE	TRUE	FALSE	TRUE	FALSE	FALSE
NONCO13922	chr11:113177482-113179607	0.2	ENSMUSG00000000567	389723	ENSMUSG00000041654	65247	0.03	-0.43	FALSE	NONCO13922	chr11:113177482-113179607	0.2	ENSMUSG00000000567	389723	ENSMUSG00000041654	65247	0.03	-0.43	0.6669	22	67224.6	darkred	2.6	0.5598	ENSG00000245857	0.05	0.02	2.21	0.12	0.4	EMPTY	FALSE	FALSE	FALSE	FALSE	FALSE	FALSE
NONCO1393	chr1:134059778-134061974	3.4	ENSMUSG00000041559	11502	ENSMUSG00000020423	13197	0.17	0.15	FALSE	NONCO1393	chr1:134059778-134061974	3.4	ENSMUSG00000041559	11502	ENSMUSG00000020423	13197	0.17	0.15	1	13	2.9	greenyellow	21.5	0.8439	EMPTY	0.01	0.08	0.14	0.01	1.35	EMPTY	FALSE	FALSE	FALSE	TRUE	TRUE	FALSE
NONCO13933	chr11:114413401-114448860	0.2	ENSMUSG00000041592	346356	ENSMUSG00000057322	219665	0.28	0.33	FALSE	NONCO13933	chr11:114413401-114448860	0.2	ENSMUSG00000041592	346356	ENSMUSG00000057322	219665	0.28	0.33	0.8745	4	12.4	lightyellow	7.3	0.7882	EMPTY	0.01	0.44	0.02	0.01	0.7	4932435O22Rik	TRUE	FALSE	TRUE	TRUE	FALSE	FALSE
NONCO13973	chr11:117022271-117040355	0.6	ENSMUSG00000043857	35324	ENSMUSG00000020823	74814	-0.34	-0.11	FALSE	NONCO13973	chr11:117022271-117040355	0.6	ENSMUSG00000043857	35324	ENSMUSG00000020823	74814	-0.34	-0.11	0.254	22	18.7	lightsteelblue1	7.9	0.1559	EMPTY	0	0.14	0.03	0.03	0.12	Gm11728	TRUE	FALSE	FALSE	TRUE	FALSE	FALSE
NONCO13974	chr11:117094948-117097128	0.6	ENSMUSG00000043857	108001	ENSMUSG00000020823	18041	0	0.15	FALSE	NONCO13974	chr11:117094948-117097128	0.6	ENSMUSG00000043857	108001	ENSMUSG00000020823	18041	0	0.15	0.7666	20	121107	darkorange	4.9	0.0365	EMPTY	0.02	0.01	1.24	0.23	0.07	Gm11730	TRUE	FALSE	TRUE	TRUE	FALSE	FALSE
NONCO13981	chr11:117395339-117408576	1	ENSMUSG00000059248	33015	ENSMUSG00000069588	75793	0.01	0.17	FALSE	NONCO13981	chr11:117395339-117408576	1	ENSMUSG00000059248	33015	ENSMUSG00000069588	75793	0.01	0.17	0.4726	18	165597	turquoise	4.9	0.1118	EMPTY	0.23	0.18	1.33	0.19	1.25	EMPTY	FALSE	TRUE	FALSE	FALSE	FALSE	FALSE
NONCO13982	chr11:117462575-117463576	3.5	ENSMUSG00000059248	100251	ENSMUSG00000069588	20793	-0.56	0.55	TRUE	NONCO13982	chr11:117462575-117463576	3.5	ENSMUSG00000059248	100251	ENSMUSG00000069588	20793	-0.56	0.55	0.031	6	104.1	brown	11.7	0.0005	EMPTY	0.01	0.04	0.22	0.13	0.06	EMPTY	FALSE	FALSE	FALSE	TRUE	FALSE	FALSE
NONCO13985	chr11:117498459-117628618	3.3	ENSMUSG00000069588	9446	ENSMUSG00000025571	25672	0.16	-0.41	FALSE	NONCO13985	chr11:117498459-117628618	3.3	ENSMUSG00000069588	9446	ENSMUSG00000025571	25672	0.16	-0.41	1	0	120801	turquoise	5.3	0.0343	EMPTY	0.53	0.29	1.85	0.09	5.87	EMPTY	FALSE	FALSE	FALSE	TRUE	FALSE	FALSE
NONCO13998	chr11:119106328-119111425	0.3	ENSMUSG00000039989	20108	ENSMUSG00000039976	31621	-0.47	0.19	FALSE	NONCO13998	chr11:119106328-119111425	0.3	ENSMUSG00000039989	20108	ENSMUSG00000039976	31621	-0.47	0.19	1	20	60726.1	orange	2.3	0.3093	EMPTY	0.13	0	543.28	0.24	0.57	Gm11754	TRUE	FALSE	FALSE	TRUE	FALSE	FALSE
NONCO140	chr1:39596958-39598069	0.4	ENSMUSG00000048234	19554	ENSMUSG00000050967	20338	0.72	-0.23	TRUE	NONCO140	chr1:39596958-39598069	0.4	ENSMUSG00000048234	19554	ENSMUSG00000050967	20338	0.72	-0.23	0.0149	8	275892	brown	7.2	0	EMPTY	0.63	0.01	78.69	0.02	27.06	RP24-505E24.2	FALSE	FALSE	FALSE	TRUE	TRUE	FALSE
NONCO14018	chr11:120185259-120190011	10.2	ENSMUSG00000061306	33914	ENSMUSG00000039741	42937	0.14	0.71	FALSE	NONCO14018	chr11:120185259-120190011	10.2	ENSMUSG00000061306	33914	ENSMUSG00000039741	42937	0.14	0.71	0.3708	9	11.9	midnightblue	83.1	0	ENSG00000253377	0.3	0.8	0.38	0.01	26	2810410L24Rik	TRUE	FALSE	TRUE	TRUE	FALSE	FALSE
NONCO14041	chr11:121804221-121808341	1.7	ENSMUSG00000039208	87916	ENSMUSG00000039198	21907	EMPTY	EMPTY	FALSE	NONCO14041	chr11:121804221-121808341	1.7	ENSMUSG00000039208	87916	ENSMUSG00000039198	21907	EMPTY	EMPTY	0.114	20	190658	blue	4	0.0035	ENSG00000272375	0	0	6.38	0.12	0.03	EMPTY	FALSE	FALSE	FALSE	TRUE	FALSE	FALSE
NONCO14044	chr12:3161965-3195912	0.9	End of chr12	3161965	ENSMUSG00000020671	51519	EMPTY	EMPTY	TRUE	NONCO14044	chr12:3161965-3195912	0.9	End of chr12	3161965	ENSMUSG00000020671	51519	EMPTY	EMPTY	0.0377	18	180031	blue	3.9	0.0353	ENSG00000248964	1	0.31	3.17	0.1	9.52	EMPTY	FALSE	FALSE	FALSE	FALSE	FALSE	FALSE
NONCO14045	chr12:3189566-3189960	0.1	End of chr12	3189566	ENSMUSG00000020671	57471	EMPTY	EMPTY	FALSE	NONCO14045	chr12:3189566-3189960	0.1	End of chr12	3189566	ENSMUSG00000020671	57471	EMPTY	EMPTY	1	9	16.1	brown	1.8	NA	ENSG00000248964	0.38	0.31	1.2	0.1	3.68	EMPTY	FALSE	FALSE	FALSE	FALSE	FALSE	FALSE
NONCO1406	chr1:134642254-134646520	0.3	ENSMUSG00000042207	6970	ENSMUSG00000026452	158	-0.19	0.46	FALSE	NONCO1406	chr1:134642254-134646520	0.3	ENSMUSG00000042207	6970	ENSMUSG00000026452	158	-0.19	0.46	1	13	81.2	darkgreen	7.1	0.3815	EMPTY	0.13	0.08	1.61	0	32.12	Gm26783	TRUE	TRUE	TRUE	TRUE	FALSE	FALSE
NONCO14072	chr12:5580029-6138427	0.7	ENSMUSG00000020627	204348	ENSMUSG00000020609	1839222	-0.31	0.15	FALSE	NONCO14072	chr12:5580029-6138427	0.7	ENSMUSG00000020627	204348	ENSMUSG00000020609	1839222	-0.31	0.15	1	15	84047.9	orange	3.3	0.3764	EMPTY	0.03	0.15	0.18	0.03	0.79	EMPTY	FALSE	FALSE	FALSE	FALSE	FALSE	FALSE
NONCO14077	chr12:7107334-7149554	1	ENSMUSG00000020627	1731653	ENSMUSG00000020609	828095	-0.41	-0.07	FALSE	NONCO14077	chr12:7107334-7149554	1	ENSMUSG00000020627	1731653	ENSMUSG00000020609	828095	-0.41	-0.07	0.4073	21	97661.1	darkorange	3.8	0.0409	EMPTY	EMPTY	EMPTY	EMPTY	EMPTY	EMPTY	EMPTY	FALSE	FALSE	FALSE	FALSE	FALSE	FALSE
NONCO14085	chr12:9048673-9050762	0.4	ENSMUSG00000066637	12280	ENSMUSG00000048387	523681	0.44	-0.05	FALSE	NONCO14085	chr12:9048673-9050762	0.4	ENSMUSG00000066637	12280	ENSMUSG00000048387	523681	0.44	-0.05	1	13	156354	brown4	3.1	0.1942	EMPTY	0.09	0	37.5	0.06	1.67	EMPTY	FALSE	FALSE	FALSE	FALSE	FALSE	FALSE
NONCO14086	chr12:9429518-9430504	29.5	ENSMUSG00000066637	393125	ENSMUSG00000048387	143939	0.62	0.42	FALSE	NONCO14086	chr12:9429518-9430504	29.5	ENSMUSG00000066637	393125	ENSMUSG00000048387	143939	0.62	0.42	0.0661	12	4.4	lightcyan	123.8	0	EMPTY	0.55	0	204.72	0.19	2.9	Gm7099	FALSE	FALSE	FALSE	FALSE	TRUE	FALSE
NONCO14089	chr12:10723620-10724613	1	ENSMUSG00000020621	328059	ENSMUSG00000066632	173954	0.13	0.24	FALSE	NONCO14089	chr12:10723620-10724613	1	ENSMUSG00000020621	328059	ENSMUSG00000066632	173954	0.13	0.24	0.8278	20	15016.2	greenyellow	0.6	NA	EMPTY	0.83	0.29	2.85	0.04	21.23	EMPTY	FALSE	FALSE	FALSE	TRUE	TRUE	FALSE
NONCO14093	chr12:11880965-11882700	12.7	ENSMUSG00000086022	418038	ENSMUSG00000020589	379440	0.38	-0.15	FALSE	NONCO14093	chr12:11880965-11882700	12.7	ENSMUSG00000086022	418038	ENSMUSG00000020589	379440	0.38	-0.15	1	9	4.3	brown	8.9	0.1146	EMPTY	0.96	0.14	6.75	0.01	89.56	EMPTY	FALSE	FALSE	FALSE	TRUE	TRUE	FALSE
NONCO14097	chr12:12766586-12779998	1.1	ENSMUSG00000020589	390228	ENSMUSG00000066629	131989	0.45	-0.57	TRUE	NONCO14097	chr12:12766586-12779998	1.1	ENSMUSG00000020589	390228	ENSMUSG00000066629	131989	0.45	-0.57	0.0443	22	270551	turquoise	9	0.0029	EMPTY	0.01	0.14	0.06	0.22	0.04	EMPTY	FALSE	FALSE	FALSE	FALSE	FALSE	FALSE
NONCO14099	chr12:12828061-12829467	2	ENSMUSG00000020589	451703	ENSMUSG00000066629	82520	0.33	0.25	FALSE	NONCO14099	chr12:12828061-12829467	2	ENSMUSG00000020589	451703	ENSMUSG00000066629	82520	0.33	0.25	0.0149	18	11.7	paleturquoise	9.3	0.0715	ENSG00000253671	0.2	0.81	0.24	0.04	4.5	EMPTY	FALSE	FALSE	FALSE	TRUE	FALSE	FALSE
NONCO14106	chr12:14929835-14930479	6.8	ENSMUSG00000050974	434679	ENSMUSG00000020601	861249	0.15	-0.7	TRUE	NONCO14106	chr12:14929835-14930479	6.8	ENSMUSG00000050974	434679	ENSMUSG00000020601	861249	0.15	-0.7	0.0455	9	60.6	midnightblue	14.5	0	EMPTY	0.98	0.14	6.87	0.04	22.24	EMPTY	FALSE	FALSE	FALSE	TRUE	TRUE	FALSE
NONCO14107	chr12:15052194-15052509	0.2	ENSMUSG00000050974	557038	ENSMUSG00000020601	739219	0.44	0.16	FALSE	NONCO14107	chr12:15052194-15052509	0.2	ENSMUSG00000050974	557038	ENSMUSG00000020601	739219	0.44	0.16	1	12	13171.4	darkgreen	0.6	NA	EMPTY	0.42	0.14	2.97	0.08	5.01	EMPTY	FALSE	FALSE	FALSE	FALSE	FALSE	FALSE
NONCO14112	chr12:16232157-16343872	5.7	ENSMUSG00000020601	415281	ENSMUSG00000020593	191798	0.29	0.4	FALSE	NONCO14112	chr12:16232157-16343872	5.7	ENSMUSG00000020601	415281	ENSMUSG00000020593	191798	0.29	0.4	0.193	0	14.5	darkred	107.9	0	EMPTY	0.02	0.82	0.02	0.14	0.13	EMPTY	FALSE	FALSE	FALSE	TRUE	FALSE	FALSE
NONCO14120	chr12:18637381-18737825	0.3	ENSMUSG00000073197	103191	ENSMUSG00000094947	116048	EMPTY	EMPTY	FALSE	NONCO14120	chr12:18637381-18737825	0.3	ENSMUSG00000073197	103191	ENSMUSG00000094947	116048	EMPTY	EMPTY	0.9921	20	10317.9	paleturquoise	0.6	NA	EMPTY	0.23	0.14	1.59	0.56	0.4	EMPTY	FALSE	FALSE	FALSE	FALSE	FALSE	FALSE
NONCO14123	chr12:18899897-18902129	0.4	ENSMUSG00000094947	45691	ENSMUSG00000093908	485680	EMPTY	EMPTY	FALSE	NONCO14123	chr12:18899897-18902129	0.4	ENSMUSG00000094947	45691	ENSMUSG00000093908	485680	EMPTY	EMPTY	0.2156	22	35886.1	blue	2	0.3818	EMPTY	EMPTY	EMPTY	EMPTY	EMPTY	EMPTY	EMPTY	FALSE	FALSE	FALSE	FALSE	FALSE	FALSE
NONCO14124	chr12:18912439-18919982	0.7	ENSMUSG00000094947	58233	ENSMUSG00000093908	467827	EMPTY	EMPTY	FALSE	NONCO14124	chr12:18912439-18919982	0.7	ENSMUSG00000094947	58233	ENSMUSG00000093908	467827	EMPTY	EMPTY	0.9417	20	5.6	blue	3.9	0.9298	ENSG00000271646	EMPTY	EMPTY	EMPTY	EMPTY	EMPTY	EMPTY	FALSE	FALSE	FALSE	FALSE	FALSE	FALSE
NONCO14126	chr12:19246503-19248379	2	ENSMUSG00000094947	392297	ENSMUSG00000093908	139430	EMPTY	EMPTY	FALSE	NONCO14126	chr12:19246503-19248379	2	ENSMUSG00000094947	392297	ENSMUSG00000093908	139430	EMPTY	EMPTY	1	13	3.3	ivory	7.8	0.7204	EMPTY	EMPTY	EMPTY	EMPTY	EMPTY	EMPTY	EMPTY	FALSE	FALSE	FALSE	FALSE	FALSE	FALSE
NONCO14127	chr12:19309465-19309939	0.2	ENSMUSG00000094947	455259	ENSMUSG00000093908	77870	EMPTY	EMPTY	FALSE	NONCO14127	chr12:19309465-19309939	0.2	ENSMUSG00000094947	455259	ENSMUSG00000093908	77870	EMPTY	EMPTY	1	15	60701.6	lightsteelblue1	2.7	0.2753	EMPTY	EMPTY	EMPTY	EMPTY	EMPTY	EMPTY	EMPTY	FALSE	FALSE	FALSE	TRUE	FALSE	FALSE
NONCO14129	chr12:19404425-19408718	1.2	ENSMUSG00000093908	14140	ENSMUSG00000095254	198212	EMPTY	EMPTY	FALSE	NONCO14129	chr12:19404425-19408718	1.2	ENSMUSG00000093908	14140	ENSMUSG00000095254	198212	EMPTY	EMPTY	1	7	19.7	brown	16.5	0.0013	EMPTY	0.57	0.14	4.02	0.33	1.74	EMPTY	FALSE	FALSE	FALSE	FALSE	FALSE	FALSE
NONCO14130	chr12:19554585-19563308	1.4	ENSMUSG00000093908	164300	ENSMUSG00000095254	43622	EMPTY	EMPTY	FALSE	NONCO14130	chr12:19554585-19563308	1.4	ENSMUSG00000093908	164300	ENSMUSG00000095254	43622	EMPTY	EMPTY	0.3159	21	10.5	blue	4.7	0.4969	EMPTY	0.4	0.14	2.84	0.19	2.08	EMPTY	FALSE	FALSE	FALSE	FALSE	FALSE	FALSE
NONCO14137	chr12:21013035-21040058	1	ENSMUSG00000069755	112169	ENSMUSG00000052632	71691	0.38	-0.25	FALSE	NONCO14137	chr12:21013035-21040058	1	ENSMUSG00000069755	112169	ENSMUSG00000052632	71691	0.38	-0.25	1	7	7.3	brown	8.4	0.7694	EMPTY	EMPTY	EMPTY	EMPTY	EMPTY	EMPTY	EMPTY	FALSE	FALSE	FALSE	FALSE	FALSE	FALSE
NONCO14141	chr12:21542934-21630574	33.9	ENSMUSG00000076432	125298	ENSMUSG00000071362	2148339	EMPTY	EMPTY	FALSE	NONCO14141	chr12:21542934-21630574	33.9	ENSMUSG00000076432	125298	ENSMUSG00000071362	2148339	EMPTY	EMPTY	0.0661	2	1.8	darkmagenta	115.6	0.1045	EMPTY	EMPTY	EMPTY	EMPTY	EMPTY	EMPTY	EMPTY	FALSE	FALSE	FALSE	TRUE	FALSE	FALSE
NONCO14142	chr12:21775875-21776852	4.6	ENSMUSG00000076432	358239	ENSMUSG00000071362	2002061	EMPTY	EMPTY	FALSE	NONCO14142	chr12:21775875-21776852	4.6	ENSMUSG00000076432	358239	ENSMUSG00000071362	2002061	EMPTY	EMPTY	0.2287	8	3.2	midnightblue	7.3	0.3567	EMPTY	0.98	0.14	6.9	0.23	4.3	Gm5633	FALSE	FALSE	FALSE	FALSE	TRUE	FALSE
NONCO14143	chr12:22102275-22104114	0.5	ENSMUSG00000076432	684639	ENSMUSG00000071362	1674799	EMPTY	EMPTY	FALSE	NONCO14143	chr12:22102275-22104114	0.5	ENSMUSG00000076432	684639	ENSMUSG00000071362	1674799	EMPTY	EMPTY	1	15	39614.3	white	2.2	0.4719	EMPTY	0.08	0.14	0.53	0.01	5.65	EMPTY	FALSE	FALSE	FALSE	FALSE	FALSE	FALSE
NONCO14146	chr12:22868508-22869100	0	ENSMUSG00000076432	1450872	ENSMUSG00000071362	909813	EMPTY	EMPTY	FALSE	NONCO14146	chr12:22868508-22869100	0	ENSMUSG00000076432	1450872	ENSMUSG00000071362	909813	EMPTY	EMPTY	1	11	15341.6	blue	0.7	NA	EMPTY	0.63	0.14	4.44	0.03	18.75	EMPTY	FALSE	FALSE	FALSE	FALSE	FALSE	FALSE
NONCO14147	chr12:23258063-23261328	0.9	ENSMUSG00000076432	1840427	ENSMUSG00000071362	517585	EMPTY	EMPTY	FALSE	NONCO14147	chr12:23258063-23261328	0.9	ENSMUSG00000076432	1840427	ENSMUSG00000071362	517585	EMPTY	EMPTY	1	13	3.3	darkred	1.7	NA	EMPTY	EMPTY	EMPTY	EMPTY	EMPTY	EMPTY	EMPTY	FALSE	FALSE	FALSE	FALSE	FALSE	FALSE
NONCO14151	chr12:24622526-24624068	1.1	ENSMUSG00000020656	5136	ENSMUSG00000020653	27304	-0.23	-0.52	FALSE	NONCO14151	chr12:24622526-24624068	1.1	ENSMUSG00000020656	5136	ENSMUSG00000020653	27304	-0.23	-0.52	0.6291	18	433723	blue	9.4	0.1584	EMPTY	0.02	0.15	0.12	0.15	0.12	EMPTY	FALSE	FALSE	FALSE	FALSE	FALSE	FALSE
NONCO14152	chr12:24638072-24639099	117.2	ENSMUSG00000020656	20682	ENSMUSG00000020653	12273	0.02	0.04	FALSE	NONCO14152	chr12:24638072-24639099	117.2	ENSMUSG00000020656	20682	ENSMUSG00000020653	12273	0.02	0.04	0.0954	2	3.5	salmon4	1157.3	0	EMPTY	0.66	0.15	4.44	0.26	2.57	Gm6969	FALSE	FALSE	FALSE	TRUE	TRUE	FALSE
NONCO14157	chr12:25139536-25209204	0.9	ENSMUSG00000020644	43445	ENSMUSG00000020642	1097594	-0.14	-0.09	FALSE	NONCO14157	chr12:25139536-25209204	0.9	ENSMUSG00000020644	43445	ENSMUSG00000020642	1097594	-0.14	-0.09	1	13	45654.4	lightyellow	2.9	0.7872	EMPTY	0	0.34	0	0.14	0.01	EMPTY	FALSE	FALSE	FALSE	TRUE	FALSE	FALSE
NONCO14158	chr12:25683403-25712289	2.6	ENSMUSG00000020644	587312	ENSMUSG00000020642	594509	0.35	0.62	FALSE	NONCO14158	chr12:25683403-25712289	2.6	ENSMUSG00000020644	587312	ENSMUSG00000020642	594509	0.35	0.62	1	9	63082.7	brown	3.3	0.555	EMPTY	0.01	0	5.99	0.14	0.1	EMPTY	FALSE	TRUE	FALSE	FALSE	FALSE	FALSE
NONCO14171	chr12:29041339-29042218	1	ENSMUSG00000036613	173849	ENSMUSG00000061911	486167	-0.25	-0.23	FALSE	NONCO14171	chr12:29041339-29042218	1	ENSMUSG00000036613	173849	ENSMUSG00000061911	486167	-0.25	-0.23	1	17	43.4	blue	3.3	0.449	EMPTY	0.02	0.14	0.15	0.28	0.07	EMPTY	FALSE	FALSE	FALSE	FALSE	FALSE	FALSE
NONCO14172	chr12:29140991-29198080	1.5	ENSMUSG00000036613	273501	ENSMUSG00000061911	330305	0.32	0.64	FALSE	NONCO14172	chr12:29140991-29198080	1.5	ENSMUSG00000036613	273501	ENSMUSG00000061911	330305	0.32	0.64	0.3159	22	13.2	turquoise	11.9	0.4323	EMPTY	0.15	0.14	1.09	0.06	2.39	EMPTY	FALSE	FALSE	FALSE	TRUE	FALSE	TRUE
NONCO14173	chr12:29357687-29458347	2.3	ENSMUSG00000036613	490197	ENSMUSG00000061911	70038	0.6	0.76	FALSE	NONCO14173	chr12:29357687-29458347	2.3	ENSMUSG00000036613	490197	ENSMUSG00000061911	70038	0.6	0.76	0.2979	20	219179	lightsteelblue1	7.9	0.0705	EMPTY	0	0.27	0.01	0.02	0.18	EMPTY	FALSE	FALSE	FALSE	TRUE	FALSE	FALSE
NONCO14179	chr12:31018170-31020317	32.6	ENSMUSG00000020669	58009	ENSMUSG00000036136	53652	EMPTY	EMPTY	TRUE	NONCO14179	chr12:31018170-31020317	32.6	ENSMUSG00000020669	58009	ENSMUSG00000036136	53652	EMPTY	EMPTY	0.0084	16	15	darkgreen	20.8	0	EMPTY	0.32	0.14	2.22	0.15	2.08	EMPTY	FALSE	FALSE	FALSE	TRUE	TRUE	FALSE
NONCO14180	chr12:31258605-31258969	4.8	ENSMUSG00000095953	73429	ENSMUSG00000002900	6266	EMPTY	EMPTY	FALSE	NONCO14180	chr12:31258605-31258969	4.8	ENSMUSG00000095953	73429	ENSMUSG00000002900	6266	EMPTY	EMPTY	0.5782	6	9.4	midnightblue	9.7	0.008	EMPTY	0.39	0.5	0.77	0.09	4.19	Gm24613	FALSE	FALSE	FALSE	FALSE	TRUE	FALSE
NONCO14192	chr12:32711510-32713156	3.4	ENSMUSG00000090946	328568	ENSMUSG00000020572	107180	-0.34	-0.27	FALSE	NONCO14192	chr12:32711510-32713156	3.4	ENSMUSG00000090946	328568	ENSMUSG00000020572	107180	-0.34	-0.27	0.4325	16	7.7	darkgreen	7.9	0.1781	EMPTY	0.14	0.14	0.95	0.1	1.4	EMPTY	FALSE	FALSE	FALSE	TRUE	FALSE	FALSE
NONCO14194	chr12:32896471-32898737	0.3	ENSMUSG00000020572	43103	ENSMUSG00000020570	55155	-0.42	0.44	FALSE	NONCO14194	chr12:32896471-32898737	0.3	ENSMUSG00000020572	43103	ENSMUSG00000020570	55155	-0.42	0.44	1	19	160250	lightsteelblue1	4	0.4279	EMPTY	0.02	0.01	2.23	0.07	0.37	EMPTY	FALSE	FALSE	TRUE	TRUE	FALSE	FALSE
NONCO14202	chr12:34047582-34056473	5.1	ENSMUSG00000035799	87766	ENSMUSG00000095406	233802	EMPTY	EMPTY	TRUE	NONCO14202	chr12:34047582-34056473	5.1	ENSMUSG00000035799	87766	ENSMUSG00000095406	233802	EMPTY	EMPTY	0.0069	2	3	darkmagenta	194.8	0	EMPTY	0.54	0.01	90.22	0.22	2.45	EMPTY	FALSE	FALSE	FALSE	FALSE	FALSE	FALSE
NONCO14207	chr12:34678445-34682176	0.8	ENSMUSG00000004698	149557	ENSMUSG00000052376	191555	-0.11	-0.2	FALSE	NONCO14207	chr12:34678445-34682176	0.8	ENSMUSG00000004698	149557	ENSMUSG00000052376	191555	-0.11	-0.2	1	5	4	brown	32.8	0.8887	EMPTY	0.02	0.14	0.17	0.17	0.14	EMPTY	FALSE	FALSE	FALSE	TRUE	FALSE	FALSE
NONCO14208	chr12:34733150-34740132	0.7	ENSMUSG00000004698	204262	ENSMUSG00000052376	133599	-0.17	-0.32	FALSE	NONCO14208	chr12:34733150-34740132	0.7	ENSMUSG00000004698	204262	ENSMUSG00000052376	133599	-0.17	-0.32	1	5	2.4	yellowgreen	5.1	0.9828	EMPTY	0.02	0.14	0.15	0.03	0.77	EMPTY	FALSE	FALSE	FALSE	FALSE	FALSE	FALSE
NONCO14210	chr12:35039088-35040774	0.4	ENSMUSG00000092305	52653	ENSMUSG00000020590	6416	EMPTY	EMPTY	FALSE	NONCO14210	chr12:35039088-35040774	0.4	ENSMUSG00000092305	52653	ENSMUSG00000020590	6416	EMPTY	EMPTY	0.254	0	134220	darkred	3.3	0.0279	EMPTY	0.1	0.14	0.7	0.16	0.61	EMPTY	FALSE	FALSE	FALSE	TRUE	FALSE	FALSE
NONCO14212	chr12:35773231-35774603	0.5	ENSMUSG00000019256	238194	ENSMUSG00000036231	151018	EMPTY	EMPTY	FALSE	NONCO14212	chr12:35773231-35774603	0.5	ENSMUSG00000019256	238194	ENSMUSG00000036231	151018	EMPTY	EMPTY	0.0634	14	20.2	darkgreen	2.7	0.2186	EMPTY	0.97	1	0.97	0.19	4.99	EMPTY	FALSE	FALSE	FALSE	FALSE	FALSE	FALSE
NONCO14233	chr12:45466262-45655187	3.9	ENSMUSG00000046314	391770	ENSMUSG00000021047	1039331	-0.28	0.34	FALSE	NONCO14233	chr12:45466262-45655187	3.9	ENSMUSG00000046314	391770	ENSMUSG00000021047	1039331	-0.28	0.34	1	11	2.8	blue	25.6	0.8286	EMPTY	0.06	0.04	1.45	0.18	0.34	EMPTY	FALSE	TRUE	FALSE	TRUE	FALSE	TRUE
NONCO14240	chr12:49467152-49476075	1.9	ENSMUSG00000089922	59807	ENSMUSG00000002688	865157	EMPTY	EMPTY	FALSE	NONCO14240	chr12:49467152-49476075	1.9	ENSMUSG00000089922	59807	ENSMUSG00000002688	865157	EMPTY	EMPTY	1	17	3.4	brown4	9	0.9311	ENSG00000249500	0.07	0.78	0.09	0.02	2.76	EMPTY	FALSE	TRUE	FALSE	FALSE	FALSE	FALSE
NONCO14248	chr12:50714260-50900892	2	ENSMUSG00000002688	65038	ENSMUSG00000035293	447170	-0.18	0.04	FALSE	NONCO14248	chr12:50714260-50900892	2	ENSMUSG00000002688	65038	ENSMUSG00000035293	447170	-0.18	0.04	1	9	6.3	midnightblue	21.2	0.1499	EMPTY	0.89	0.11	7.96	0.17	5.24	EMPTY	FALSE	FALSE	FALSE	FALSE	FALSE	TRUE
NONCO14250	chr12:51133340-51151174	11.9	ENSMUSG00000002688	484118	ENSMUSG00000035293	196888	0.2	-0.08	FALSE	NONCO14250	chr12:51133340-51151174	11.9	ENSMUSG00000002688	484118	ENSMUSG00000035293	196888	0.2	-0.08	1	7	6.2	greenyellow	3.8	0.8569	EMPTY	0	0.68	0.01	0.1	0.05	EMPTY	FALSE	FALSE	FALSE	TRUE	TRUE	FALSE
NONCO14251	chr12:51242807-51258364	0.4	ENSMUSG00000002688	593585	ENSMUSG00000035293	89698	0.2	-0.4	TRUE	NONCO14251	chr12:51242807-51258364	0.4	ENSMUSG00000002688	593585	ENSMUSG00000035293	89698	0.2	-0.4	0.2696	21	158662	lightsteelblue1	3.6	0.0048	EMPTY	0.06	0.03	2.27	0.12	0.46	EMPTY	FALSE	TRUE	FALSE	FALSE	FALSE	FALSE
NONCO14261	chr12:52411357-52453801	0.9	ENSMUSG00000035142	98614	ENSMUSG00000035133	62277	-0.21	0.57	FALSE	NONCO14261	chr12:52411357-52453801	0.9	ENSMUSG00000035142	98614	ENSMUSG00000035133	62277	-0.21	0.57	1	9	3.2	darkred	6.4	0.9191	EMPTY	EMPTY	EMPTY	EMPTY	EMPTY	EMPTY	EMPTY	FALSE	FALSE	FALSE	TRUE	FALSE	FALSE
NONCO14286	chr12:55554082-55556397	85.7	ENSMUSG00000021025	61436	ENSMUSG00000063129	8843	0.29	-0.42	TRUE	NONCO14286	chr12:55554082-55556397	85.7	ENSMUSG00000021025	61436	ENSMUSG00000063129	8843	0.29	-0.42	0.0057	6	6.2	midnightblue	239.8	0	EMPTY	0.91	0.09	9.8	0.09	9.75	EMPTY	FALSE	FALSE	FALSE	TRUE	FALSE	FALSE
NONCO14287	chr12:55573922-55577292	2	ENSMUSG00000063129	7027	ENSMUSG00000045440	21626	0.14	-0.09	FALSE	NONCO14287	chr12:55573922-55577292	2	ENSMUSG00000063129	7027	ENSMUSG00000045440	21626	0.14	-0.09	1	13	2.6	lightcyan	21.5	0.9406	EMPTY	0.1	0.94	0.11	0.08	1.29	EMPTY	FALSE	FALSE	FALSE	FALSE	FALSE	TRUE
NONCO14290	chr12:56373451-56400850	515.9	ENSMUSG00000021028	27558	ENSMUSG00000001496	131109	EMPTY	EMPTY	FALSE	NONCO14290	chr12:56373451-56400850	515.9	ENSMUSG00000021028	27558	ENSMUSG00000001496	131109	EMPTY	EMPTY	0.1367	6	2.4	midnightblue	1065.7	0.0001	EMPTY	1	0.08	12.14	0.09	11	Gm6265	FALSE	FALSE	FALSE	TRUE	TRUE	FALSE
NONCO14297	chr12:58436919-58649086	4.1	ENSMUSG00000045930	167662	ENSMUSG00000020986	309298	-0.19	0.39	FALSE	NONCO14297	chr12:58436919-58649086	4.1	ENSMUSG00000045930	167662	ENSMUSG00000020986	309298	-0.19	0.39	1	11	20.6	lightsteelblue1	19.8	0.2819	EMPTY	0.1	0.17	0.56	0.04	2.42	EMPTY	FALSE	TRUE	FALSE	TRUE	FALSE	TRUE
NONCO1430	chr1:136581611-136599842	1.1	ENSMUSG00000041498	50101	ENSMUSG00000041483	25060	-0.13	0.37	FALSE	NONCO1430	chr1:136581611-136599842	1.1	ENSMUSG00000041498	50101	ENSMUSG00000041483	25060	-0.13	0.37	1	11	52655.8	blue	2.1	0.335	ENSG00000238217	0.02	0.03	0.47	0.12	0.13	EMPTY	FALSE	FALSE	FALSE	FALSE	FALSE	FALSE
NONCO14314	chr12:69122982-69123852	59.9	ENSMUSG00000034912	1900434	ENSMUSG00000034892	33871	0.03	0.22	FALSE	NONCO14314	chr12:69122982-69123852	59.9	ENSMUSG00000034912	1900434	ENSMUSG00000034892	33871	0.03	0.22	0.193	0	1.6	salmon4	508.7	0.0322	EMPTY	0.92	0.11	8.17	0.09	10.42	EMPTY	FALSE	FALSE	FALSE	TRUE	TRUE	FALSE
NONCO14338	chr12:71533307-71555898	0.9	ENSMUSG00000044548	213201	ENSMUSG00000034574	275181	-0.31	-0.36	TRUE	NONCO14338	chr12:71533307-71555898	0.9	ENSMUSG00000044548	213201	ENSMUSG00000034574	275181	-0.31	-0.36	0.0455	20	274900	turquoise	10.9	0.0001	EMPTY	0.02	0	13.31	0.11	0.21	EMPTY	FALSE	FALSE	FALSE	TRUE	FALSE	FALSE
NONCO14339	chr12:71577003-71584923	1.2	ENSMUSG00000044548	256897	ENSMUSG00000034574	246156	0.01	0.35	FALSE	NONCO14339	chr12:71577003-71584923	1.2	ENSMUSG00000044548	256897	ENSMUSG00000034574	246156	0.01	0.35	0.1539	20	95575	blue	3.3	0.2298	EMPTY	0.02	0.06	0.38	0.17	0.14	EMPTY	FALSE	FALSE	FALSE	TRUE	FALSE	FALSE
NONCO14347	chr12:72854525-72855573	0.7	ENSMUSG00000021096	59586	ENSMUSG00000021098	25537	0.53	0.2	FALSE	NONCO14347	chr12:72854525-72855573	0.7	ENSMUSG00000021096	59586	ENSMUSG00000021098	25537	0.53	0.2	0.7225	17	336904	blue	6.9	NA	ENSG00000277825	0.18	0.05	3.71	0.13	1.39	EMPTY	FALSE	FALSE	FALSE	FALSE	FALSE	FALSE
NONCO14355	chr12:74346174-74346466	0.4	ENSMUSG00000079061	29781	ENSMUSG00000034402	550752	EMPTY	EMPTY	FALSE	NONCO14355	chr12:74346174-74346466	0.4	ENSMUSG00000079061	29781	ENSMUSG00000034402	550752	EMPTY	EMPTY	0.129	14	66220.3	darkgreen	2	0.119	EMPTY	0.95	0.04	24.16	0.71	1.35	EMPTY	FALSE	FALSE	FALSE	TRUE	FALSE	FALSE
NONCO14357	chr12:74825331-74828442	1.7	ENSMUSG00000079061	508938	ENSMUSG00000034402	68776	EMPTY	EMPTY	FALSE	NONCO14357	chr12:74825331-74828442	1.7	ENSMUSG00000079061	508938	ENSMUSG00000034402	68776	EMPTY	EMPTY	1	11	2.1	lightyellow	22.4	0.9151	EMPTY	EMPTY	EMPTY	EMPTY	EMPTY	EMPTY	EMPTY	FALSE	FALSE	FALSE	TRUE	FALSE	FALSE
NONCO1436	chr1:137954514-137972313	1.8	ENSMUSG00000026398	994067	ENSMUSG00000026395	90549	EMPTY	EMPTY	FALSE	NONCO1436	chr1:137954514-137972313	1.8	ENSMUSG00000026398	994067	ENSMUSG00000026395	90549	EMPTY	EMPTY	0.2979	6	300.5	brown	14.7	0.0002	EMPTY	0.08	0.14	0.59	0.07	1.21	RP23-44N5.7	FALSE	FALSE	FALSE	TRUE	FALSE	FALSE
NONCO14377	chr12:77742332-77799323	1.9	ENSMUSG00000021065	265995	ENSMUSG00000047454	427333	0.04	-0.15	FALSE	NONCO14377	chr12:77742332-77799323	1.9	ENSMUSG00000021065	265995	ENSMUSG00000047454	427333	0.04	-0.15	0.8278	4	3	greenyellow	18.4	0.8364	EMPTY	0.06	0.1	0.58	0.22	0.27	EMPTY	FALSE	FALSE	FALSE	TRUE	FALSE	FALSE
NONCO14385	chr12:79657842-79814378	4.4	ENSMUSG00000059060	149187	ENSMUSG00000021127	293383	EMPTY	EMPTY	FALSE	NONCO14385	chr12:79657842-79814378	4.4	ENSMUSG00000059060	149187	ENSMUSG00000021127	293383	EMPTY	EMPTY	0.2979	4	4.6	salmon4	18	0.5467	EMPTY	0.94	0	781.33	0.05	17.6	EMPTY	FALSE	TRUE	FALSE	TRUE	FALSE	FALSE
NONCO14387	chr12:79910556-79933871	3.4	ENSMUSG00000059060	401901	ENSMUSG00000021127	173890	EMPTY	EMPTY	FALSE	NONCO14387	chr12:79910556-79933871	3.4	ENSMUSG00000059060	401901	ENSMUSG00000021127	173890	EMPTY	EMPTY	1	5	5.8	lightyellow	10.5	0.8393	EMPTY	0.18	0.01	26.24	0.02	8.26	EMPTY	FALSE	FALSE	FALSE	FALSE	FALSE	FALSE
NONCO14388	chr12:79932619-79933136	1.2	ENSMUSG00000059060	423964	ENSMUSG00000021127	174625	EMPTY	EMPTY	FALSE	NONCO14388	chr12:79932619-79933136	1.2	ENSMUSG00000059060	423964	ENSMUSG00000021127	174625	EMPTY	EMPTY	1	15	3.3	lightsteelblue1	1.5	NA	EMPTY	0.08	0	24.31	0	20.6	EMPTY	FALSE	FALSE	FALSE	FALSE	FALSE	FALSE
NONCO14389	chr12:79969614-79971253	0.8	ENSMUSG00000059060	460959	ENSMUSG00000021127	136508	EMPTY	EMPTY	FALSE	NONCO14389	chr12:79969614-79971253	0.8	ENSMUSG00000059060	460959	ENSMUSG00000021127	136508	EMPTY	EMPTY	1	9	130989	lightyellow	5.9	0.1249	ENSG00000272727	0.2	0	196.2	0.01	31.96	EMPTY	FALSE	FALSE	FALSE	TRUE	FALSE	FALSE
NONCO144	chr1:42261762-42304414	0.5	ENSMUSG00000079588	1404876	ENSMUSG00000045515	391355	0.21	-0.01	TRUE	NONCO144	chr1:42261762-42304414	0.5	ENSMUSG00000079588	1404876	ENSMUSG00000045515	391355	0.21	-0.01	1	22	59.3	lightsteelblue1	5.8	0.0214	EMPTY	0.07	0	26.68	0.06	1	Gm28175	FALSE	TRUE	FALSE	TRUE	FALSE	FALSE
NONCO14406	chr12:81344729-81349475	5.2	ENSMUSG00000079055	11550	ENSMUSG00000021139	9386	EMPTY	EMPTY	FALSE	NONCO14406	chr12:81344729-81349475	5.2	ENSMUSG00000079055	11550	ENSMUSG00000021139	9386	EMPTY	EMPTY	0.0548	4	5.5	brown	269.5	0	EMPTY	EMPTY	EMPTY	EMPTY	EMPTY	EMPTY	EMPTY	FALSE	FALSE	FALSE	FALSE	FALSE	TRUE
NONCO14414	chr12:82073373-82123058	1.7	ENSMUSG00000021140	72450	ENSMUSG00000042700	46959	-0.04	0.02	FALSE	NONCO14414	chr12:82073373-82123058	1.7	ENSMUSG00000021140	72450	ENSMUSG00000042700	46959	-0.04	0.02	1	13	250846	darkred	10.9	0.0044	EMPTY	0.04	0.15	0.28	0.13	0.32	EMPTY	FALSE	TRUE	FALSE	TRUE	FALSE	FALSE
NONCO14424	chr12:83603493-83621175	1.1	ENSMUSG00000042628	6347	ENSMUSG00000010608	10062	-0.17	0.02	FALSE	NONCO14424	chr12:83603493-83621175	1.1	ENSMUSG00000042628	6347	ENSMUSG00000010608	10062	-0.17	0.02	0.0954	10	3.5	midnightblue	16	0.0648	EMPTY	0.31	0.14	2.2	0.31	1	Gm26623	TRUE	FALSE	TRUE	TRUE	TRUE	FALSE
NONCO14430	chr12:84028690-84029954	1.1	ENSMUSG00000072949	11021	ENSMUSG00000052392	8426	0.1	-0.22	FALSE	NONCO14430	chr12:84028690-84029954	1.1	ENSMUSG00000072949	11021	ENSMUSG00000052392	8426	0.1	-0.22	0.5782	14	6.1	lightcyan	19.2	0.3002	EMPTY	EMPTY	EMPTY	EMPTY	EMPTY	EMPTY	EMPTY	FALSE	FALSE	FALSE	FALSE	FALSE	TRUE
NONCO14434	chr12:84258256-84265685	234.1	ENSMUSG00000042507	39376	ENSMUSG00000072946	19548	EMPTY	EMPTY	FALSE	NONCO14434	chr12:84258256-84265685	234.1	ENSMUSG00000042507	39376	ENSMUSG00000072946	19548	EMPTY	EMPTY	0.114	5	2.9	midnightblue	333.8	0	EMPTY	0.03	0.14	0.23	0.26	0.13	Gm5436	FALSE	FALSE	FALSE	TRUE	TRUE	FALSE
NONCO14440	chr12:84538623-84546429	3.4	ENSMUSG00000085793	7091	ENSMUSG00000021239	23334	EMPTY	EMPTY	FALSE	NONCO14440	chr12:84538623-84546429	3.4	ENSMUSG00000085793	7091	ENSMUSG00000021239	23334	EMPTY	EMPTY	1	13	4.4	blue	16.3	0.7232	EMPTY	0.07	0.04	1.72	0.17	0.43	EMPTY	FALSE	FALSE	FALSE	TRUE	FALSE	FALSE
NONCO14448	chr12:85187387-85213261	18.7	ENSMUSG00000004791	10092	ENSMUSG00000004788	6221	0.53	0.16	FALSE	NONCO14448	chr12:85187387-85213261	18.7	ENSMUSG00000004791	10092	ENSMUSG00000004788	6221	0.53	0.16	0.1619	8	2.3	midnightblue	61	0.002	EMPTY	0.63	0.01	61.11	0.18	3.52	EMPTY	FALSE	FALSE	FALSE	TRUE	TRUE	FALSE
NONCO14451	chr12:85524450-85542481	87.7	ENSMUSG00000021250	47178	ENSMUSG00000034271	56625	0.58	0.58	TRUE	NONCO14451	chr12:85524450-85542481	87.7	ENSMUSG00000021250	47178	ENSMUSG00000034271	56625	0.58	0.58	0.0455	4	4.8	midnightblue	230.4	0	EMPTY	0.06	0	12.49	0.36	0.17	EMPTY	FALSE	FALSE	TRUE	TRUE	FALSE	FALSE
NONCO14452	chr12:85569967-85584319	0.5	ENSMUSG00000021250	92695	ENSMUSG00000034271	14787	-0.1	-0.14	FALSE	NONCO14452	chr12:85569967-85584319	0.5	ENSMUSG00000021250	92695	ENSMUSG00000034271	14787	-0.1	-0.14	1	13	142514	lightsteelblue1	4	0.2015	EMPTY	0.02	0.03	0.58	0.06	0.24	EMPTY	FALSE	FALSE	FALSE	FALSE	FALSE	FALSE
NONCO14458	chr12:86801370-86802145	0.7	ENSMUSG00000059114	37576	ENSMUSG00000034168	78559	EMPTY	EMPTY	FALSE	NONCO14458	chr12:86801370-86802145	0.7	ENSMUSG00000059114	37576	ENSMUSG00000034168	78559	EMPTY	EMPTY	1	13	8.5	greenyellow	6.8	0.9588	EMPTY	0.05	0.04	1.15	0.15	0.34	EMPTY	FALSE	FALSE	FALSE	TRUE	FALSE	FALSE
NONCO14459	chr12:86821449-86830599	0.7	ENSMUSG00000059114	57655	ENSMUSG00000034168	50105	EMPTY	EMPTY	FALSE	NONCO14459	chr12:86821449-86830599	0.7	ENSMUSG00000059114	57655	ENSMUSG00000034168	50105	EMPTY	EMPTY	0.254	22	45571.7	darkorange	1.6	NA	EMPTY	0.04	0.09	0.42	0.16	0.23	EMPTY	FALSE	FALSE	TRUE	TRUE	FALSE	TRUE
NONCO1446	chr1:143093264-143094695	1003.9	ENSMUSG00000052726	2481198	ENSMUSG00000026361	504106	0.51	0.33	FALSE	NONCO1446	chr1:143093264-143094695	1003.9	ENSMUSG00000052726	2481198	ENSMUSG00000026361	504106	0.51	0.33	0.0548	0	2.4	turquoise	245.1	0	EMPTY	0.89	0.14	6.46	0	290.36	Gm5835	FALSE	FALSE	FALSE	TRUE	TRUE	FALSE
NONCO14460	chr12:86845762-86846523	102.6	ENSMUSG00000059114	81968	ENSMUSG00000034168	34181	EMPTY	EMPTY	FALSE	NONCO14460	chr12:86845762-86846523	102.6	ENSMUSG00000059114	81968	ENSMUSG00000034168	34181	EMPTY	EMPTY	0.1367	8	1.9	midnightblue	638.2	0.0003	ENSG00000259821	0.44	0.03	17.65	0.18	2.52	EMPTY	FALSE	FALSE	FALSE	TRUE	TRUE	TRUE
NONCO14462	chr12:86895101-86940906	2.2	ENSMUSG00000034168	10288	ENSMUSG00000034157	6138	0.74	-0.53	FALSE	NONCO14462	chr12:86895101-86940906	2.2	ENSMUSG00000034168	10288	ENSMUSG00000034157	6138	0.74	-0.53	0.018	6	24.8	midnightblue	6.6	0.0533	EMPTY	0.13	0.01	18.74	0.17	0.73	EMPTY	FALSE	FALSE	FALSE	TRUE	FALSE	FALSE
NONCO14475	chr12:88351852-88354232	2.1	ENSMUSG00000069276	22171	ENSMUSG00000021044	6323	EMPTY	EMPTY	FALSE	NONCO14475	chr12:88351852-88354232	2.1	ENSMUSG00000069276	22171	ENSMUSG00000021044	6323	EMPTY	EMPTY	1	13	7.5	blue	2.8	0.7915	EMPTY	0.85	0	878.21	0.19	4.38	EMPTY	FALSE	FALSE	FALSE	FALSE	FALSE	FALSE
NONCO14484	chr12:90791173-90893923	0.9	ENSMUSG00000007682	52736	ENSMUSG00000061533	104570	0.8	0.38	FALSE	NONCO14484	chr12:90791173-90893923	0.9	ENSMUSG00000007682	52736	ENSMUSG00000061533	104570	0.8	0.38	0.3482	11	49763.2	darkred	1.4	NA	ENSG00000261092	0.01	0.03	0.45	0.04	0.27	EMPTY	FALSE	FALSE	FALSE	FALSE	FALSE	FALSE
NONCO1449	chr1:143562007-143567482	6	ENSMUSG00000052726	2949941	ENSMUSG00000026361	31319	-0.49	0.42	TRUE	NONCO1449	chr1:143562007-143567482	6	ENSMUSG00000052726	2949941	ENSMUSG00000026361	31319	-0.49	0.42	0.0307	8	333541	midnightblue	10.8	0	EMPTY	0.02	0.01	1.89	0.43	0.04	EMPTY	FALSE	FALSE	FALSE	FALSE	FALSE	FALSE
NONCO14495	chr12:91878219-91904219	2.6	ENSMUSG00000020964	29063	ENSMUSG00000094935	2022786	EMPTY	EMPTY	FALSE	NONCO14495	chr12:91878219-91904219	2.6	ENSMUSG00000020964	29063	ENSMUSG00000094935	2022786	EMPTY	EMPTY	1	9	17.5	turquoise	10.1	0.642	EMPTY	0.03	0	22.7	0.19	0.17	EMPTY	FALSE	FALSE	FALSE	FALSE	FALSE	FALSE
NONCO14496	chr12:91890853-91891356	2.4	ENSMUSG00000020964	41697	ENSMUSG00000094935	2035649	EMPTY	EMPTY	FALSE	NONCO14496	chr12:91890853-91891356	2.4	ENSMUSG00000020964	41697	ENSMUSG00000094935	2035649	EMPTY	EMPTY	0.0795	12	12.2	midnightblue	10.1	0.0073	EMPTY	0.4	0.63	0.64	0.03	14.44	Rpl31-ps1	FALSE	FALSE	FALSE	FALSE	TRUE	FALSE
NONCO14497	chr12:92020428-92110262	0.4	ENSMUSG00000020964	171272	ENSMUSG00000094935	1816743	EMPTY	EMPTY	FALSE	NONCO14497	chr12:92020428-92110262	0.4	ENSMUSG00000020964	171272	ENSMUSG00000094935	1816743	EMPTY	EMPTY	0.7666	20	135817	blue	3.2	0.234	EMPTY	0.09	0.06	1.57	0.19	0.47	EMPTY	FALSE	FALSE	FALSE	TRUE	FALSE	FALSE
NONCO14503	chr12:96922271-96923148	454.4	ENSMUSG00000047414	1137057	ENSMUSG00000021003	1279157	-0.1	0.71	FALSE	NONCO14503	chr12:96922271-96923148	454.4	ENSMUSG00000047414	1137057	ENSMUSG00000021003	1279157	-0.1	0.71	0.2696	9	2.7	midnightblue	1025.7	0	EMPTY	0.77	0.23	3.39	0.06	13.77	Gm6863	FALSE	FALSE	FALSE	TRUE	TRUE	FALSE
NONCO14560	chr12:105336434-105384288	8.4	ENSMUSG00000041359	113642	ENSMUSG00000094910	69569	EMPTY	EMPTY	FALSE	NONCO14560	chr12:105336434-105384288	8.4	ENSMUSG00000041359	113642	ENSMUSG00000094910	69569	EMPTY	EMPTY	0.8745	17	2	darkgreen	107.8	0.5664	EMPTY	0.15	0.01	23.05	0.02	7.09	Tunar	TRUE	FALSE	FALSE	TRUE	FALSE	FALSE
NONCO14561	chr12:105403650-105412974	3.8	ENSMUSG00000041359	180858	ENSMUSG00000094910	40883	EMPTY	EMPTY	FALSE	NONCO14561	chr12:105403650-105412974	3.8	ENSMUSG00000041359	180858	ENSMUSG00000094910	40883	EMPTY	EMPTY	0.2156	0	214	turquoise	68.9	0.0004	EMPTY	0.09	0.14	0.62	0.01	10.84	EMPTY	FALSE	FALSE	FALSE	TRUE	FALSE	FALSE
NONCO14565	chr12:105899902-105901931	0.6	ENSMUSG00000021111	60959	ENSMUSG00000021115	108333	-0.62	0.48	FALSE	NONCO14565	chr12:105899902-105901931	0.6	ENSMUSG00000021111	60959	ENSMUSG00000021115	108333	-0.62	0.48	1	21	176838	turquoise	7.3	0.0716	EMPTY	0.05	0.13	0.41	0.17	0.32	EMPTY	FALSE	FALSE	TRUE	FALSE	FALSE	FALSE
NONCO14579	chr12:108772492-108774736	3.5	ENSMUSG00000021263	70187	ENSMUSG00000021264	18238	0.29	0.58	FALSE	NONCO14579	chr12:108772492-108774736	3.5	ENSMUSG00000021263	70187	ENSMUSG00000021264	18238	0.29	0.58	1	9	38.1	brown	22.6	0.276	EMPTY	EMPTY	EMPTY	EMPTY	EMPTY	EMPTY	EMPTY	FALSE	FALSE	FALSE	FALSE	FALSE	TRUE
NONCO14587	chr12:109540715-109576138	132.8	ENSMUSG00000040856	77380	ENSMUSG00000085925	13057	0.15	0.36	FALSE	NONCO14587	chr12:109540715-109576138	132.8	ENSMUSG00000040856	77380	ENSMUSG00000085925	13057	0.15	0.36	1	13	2	brown	3525.8	0.7829	EMPTY	0.11	0.02	4.88	0	25.32	Gm26906,Meg3	TRUE	TRUE	TRUE	TRUE	FALSE	FALSE
NONCO14589	chr12:109729782-109749489	6.8	ENSMUSG00000085925	129453	ENSMUSG00000075707	529580	0.14	-0.37	FALSE	NONCO14589	chr12:109729782-109749489	6.8	ENSMUSG00000085925	129453	ENSMUSG00000075707	529580	0.14	-0.37	1	7	2.7	brown	67.4	0.4802	EMPTY	0.49	0.58	0.83	0.12	4.19	Gm24321,Mir410,Mir412,Mirg	TRUE	TRUE	TRUE	TRUE	FALSE	FALSE
NONCO14591	chr12:110319413-110320977	6.2	ENSMUSG00000075707	38317	ENSMUSG00000017843	164763	-0.38	-0.7	TRUE	NONCO14591	chr12:110319413-110320977	6.2	ENSMUSG00000075707	38317	ENSMUSG00000017843	164763	-0.38	-0.7	0.0057	8	8.6	midnightblue	16.9	0.0011	EMPTY	0.28	0.14	2	0.19	1.46	EMPTY	FALSE	FALSE	FALSE	FALSE	TRUE	FALSE
NONCO14593	chr12:110447349-110466287	9.8	ENSMUSG00000075707	166253	ENSMUSG00000017843	19453	0.05	0.28	FALSE	NONCO14593	chr12:110447349-110466287	9.8	ENSMUSG00000075707	166253	ENSMUSG00000017843	19453	0.05	0.28	0.0795	18	4.1	blue	48	0.3733	EMPTY	0.1	0.14	0.7	0.13	0.75	EMPTY	FALSE	FALSE	FALSE	TRUE	FALSE	FALSE
NONCO14596	chr12:110591761-110592728	2.4	ENSMUSG00000017843	8701	ENSMUSG00000018707	8725	0.04	-0.14	FALSE	NONCO14596	chr12:110591761-110592728	2.4	ENSMUSG00000017843	8701	ENSMUSG00000018707	8725	0.04	-0.14	1	9	1.8	brown	22.9	0.9948	EMPTY	0.25	0.98	0.26	0.04	7.08	EMPTY	FALSE	FALSE	FALSE	TRUE	FALSE	FALSE
NONCO14611	chr12:111284762-111287363	11.2	ENSMUSG00000021278	8337	ENSMUSG00000021279	5610	0.17	-0.08	FALSE	NONCO14611	chr12:111284762-111287363	11.2	ENSMUSG00000021278	8337	ENSMUSG00000021279	5610	0.17	-0.08	1	11	10.2	brown4	2.9	0.7745	EMPTY	0.2	0	41.2	0.09	2.15	A230087F16Rik	TRUE	FALSE	TRUE	TRUE	FALSE	FALSE
NONCO14613	chr12:111494376-111496717	1	ENSMUSG00000010529	8554	ENSMUSG00000021282	41385	-0.01	0.66	TRUE	NONCO14613	chr12:111494376-111496717	1	ENSMUSG00000010529	8554	ENSMUSG00000021282	41385	-0.01	0.66	0.0455	2	10.4	darkred	19	0.0375	EMPTY	0.23	0	45.84	0.12	1.85	EMPTY	FALSE	FALSE	FALSE	FALSE	FALSE	FALSE
NONCO14618	chr12:112191260-112203999	0.3	ENSMUSG00000021294	9514	ENSMUSG00000047828	209917	EMPTY	EMPTY	FALSE	NONCO14618	chr12:112191260-112203999	0.3	ENSMUSG00000021294	9514	ENSMUSG00000047828	209917	EMPTY	EMPTY	1	17	13.7	darkgreen	2.1	0.8872	EMPTY	0.52	0.14	3.69	0.1	5.15	EMPTY	FALSE	FALSE	FALSE	FALSE	TRUE	FALSE
NONCO14630	chr12:116069881-116070262	0.3	ENSMUSG00000042063	6522	ENSMUSG00000011171	7465	0.32	0.51	FALSE	NONCO14630	chr12:116069881-116070262	0.3	ENSMUSG00000042063	6522	ENSMUSG00000011171	7465	0.32	0.51	0.8278	22	68781.3	turquoise	2.7	0.3132	EMPTY	EMPTY	EMPTY	EMPTY	EMPTY	EMPTY	EMPTY	FALSE	FALSE	FALSE	FALSE	FALSE	FALSE
NONCO14631	chr12:115982402-115992877	0.6	ENSMUSG00000096466	18207	ENSMUSG00000042063	54848	EMPTY	EMPTY	FALSE	NONCO14631	chr12:115982402-115992877	0.6	ENSMUSG00000096466	18207	ENSMUSG00000042063	54848	EMPTY	EMPTY	0.3159	4	22133.2	salmon4	1	NA	EMPTY	0.98	0	411.58	0.01	134.02	EMPTY	FALSE	FALSE	FALSE	FALSE	FALSE	FALSE
NONCO1464	chr1:147003546-147120077	1.5	ENSMUSG00000035131	101075	ENSMUSG00000056220	2709542	EMPTY	EMPTY	FALSE	NONCO1464	chr1:147003546-147120077	1.5	ENSMUSG00000035131	101075	ENSMUSG00000056220	2709542	EMPTY	EMPTY	1	17	50303.1	blue	1.3	NA	EMPTY	0.01	0.14	0.06	0.18	0.05	EMPTY	FALSE	FALSE	FALSE	FALSE	FALSE	FALSE
NONCO14645	chr12:117345533-117347960	1.5	ENSMUSG00000056553	68685	ENSMUSG00000041992	168520	-0.14	0.52	FALSE	NONCO14645	chr12:117345533-117347960	1.5	ENSMUSG00000056553	68685	ENSMUSG00000041992	168520	-0.14	0.52	0.4726	0	269893	turquoise	12.7	0.0105	EMPTY	0.09	0.14	0.65	0.26	0.36	EMPTY	FALSE	FALSE	FALSE	FALSE	FALSE	FALSE
NONCO1465	chr1:148905533-149332381	2.7	ENSMUSG00000035131	2003062	ENSMUSG00000056220	497238	EMPTY	EMPTY	FALSE	NONCO1465	chr1:148905533-149332381	2.7	ENSMUSG00000035131	2003062	ENSMUSG00000056220	497238	EMPTY	EMPTY	0.2696	8	13.1	midnightblue	7.7	0.3893	EMPTY	0	0.13	0.04	0.25	0.02	EMPTY	FALSE	FALSE	FALSE	FALSE	FALSE	FALSE
NONCO14651	chr12:119352588-119353748	7.9	ENSMUSG00000021908	88317	ENSMUSG00000041886	89663	-0.65	-0.03	FALSE	NONCO14651	chr12:119352588-119353748	7.9	ENSMUSG00000021908	88317	ENSMUSG00000041886	89663	-0.65	-0.03	0.0548	10	61	lightcyan	22.7	0	EMPTY	0.4	0.02	15.99	0.11	3.54	EMPTY	FALSE	FALSE	FALSE	TRUE	TRUE	FALSE
NONCO14652	chr12:3143672-3161780	1	End of chr12	3143672	ENSMUSG00000020671	85651	EMPTY	EMPTY	FALSE	NONCO14652	chr12:3143672-3161780	1	End of chr12	3143672	ENSMUSG00000020671	85651	EMPTY	EMPTY	0.0455	20	90493.9	turquoise	2.9	0.1025	EMPTY	0.01	0.14	0.08	0.03	0.31	EMPTY	FALSE	FALSE	FALSE	TRUE	FALSE	FALSE
NONCO14656	chr12:3329085-3357303	0.3	ENSMUSG00000020671	19117	ENSMUSG00000020668	7830	-0.2	0.11	FALSE	NONCO14656	chr12:3329085-3357303	0.3	ENSMUSG00000020671	19117	ENSMUSG00000020668	7830	-0.2	0.11	0.2287	20	163982	turquoise	6.2	0.0103	EMPTY	0.03	0.31	0.1	0.05	0.61	Gm26520	FALSE	TRUE	FALSE	TRUE	FALSE	FALSE
NONCO14670	chr12:4117192-4118119	0.1	ENSMUSG00000020657	6581	ENSMUSG00000020654	14985	0.03	-0.07	FALSE	NONCO14670	chr12:4117192-4118119	0.1	ENSMUSG00000020657	6581	ENSMUSG00000020654	14985	0.03	-0.07	0.3482	17	17259.4	paleturquoise	0.9	NA	EMPTY	0.07	0.14	0.5	0.02	2.96	EMPTY	FALSE	FALSE	FALSE	FALSE	FALSE	FALSE
NONCO1469	chr1:151072440-151088091	4.6	ENSMUSG00000066842	79006	ENSMUSG00000023150	256387	-0.06	0.62	FALSE	NONCO1469	chr1:151072440-151088091	4.6	ENSMUSG00000066842	79006	ENSMUSG00000023150	256387	-0.06	0.62	0.0661	17	5.6	blue	33.6	0.1266	EMPTY	0.14	0.18	0.78	0.18	0.82	EMPTY	FALSE	TRUE	TRUE	TRUE	FALSE	TRUE
NONCO1470	chr1:151241905-151250817	1.8	ENSMUSG00000066842	248471	ENSMUSG00000023150	93661	-0.32	-0.22	FALSE	NONCO1470	chr1:151241905-151250817	1.8	ENSMUSG00000066842	248471	ENSMUSG00000023150	93661	-0.32	-0.22	0.7666	20	2.4	greenyellow	16.3	0.9809	EMPTY	0.02	0.08	0.21	0.22	0.08	EMPTY	FALSE	TRUE	FALSE	TRUE	FALSE	TRUE
NONCO14704	chr12:10152518-10154784	1.1	ENSMUSG00000048387	571020	ENSMUSG00000020622	215190	EMPTY	EMPTY	FALSE	NONCO14704	chr12:10152518-10154784	1.1	ENSMUSG00000048387	571020	ENSMUSG00000020622	215190	EMPTY	EMPTY	0.8745	20	8.2	turquoise	27.3	0.0061	EMPTY	0.97	0.14	6.86	0.97	1	EMPTY	FALSE	FALSE	FALSE	FALSE	FALSE	FALSE
NONCO14707	chr12:10723317-10724613	69.2	ENSMUSG00000020621	327756	ENSMUSG00000066632	173954	-0.79	0.3	FALSE	NONCO14707	chr12:10723317-10724613	69.2	ENSMUSG00000020621	327756	ENSMUSG00000066632	173954	-0.79	0.3	0.1619	20	2	turquoise	67.5	0.2502	EMPTY	0.83	0.29	2.84	0.04	21.17	EMPTY	FALSE	FALSE	FALSE	TRUE	TRUE	FALSE
NONCO14709	chr12:11881093-11882703	13.2	ENSMUSG00000086022	418166	ENSMUSG00000020589	379437	0.19	0.1	FALSE	NONCO14709	chr12:11881093-11882703	13.2	ENSMUSG00000086022	418166	ENSMUSG00000020589	379437	0.19	0.1	0.3708	16	7.4	darkgreen	7.6	0.5478	ENSG00000260983	0.82	0.14	5.81	0.01	77.19	EMPTY	FALSE	FALSE	FALSE	TRUE	TRUE	FALSE
NONCO14714	chr12:12711634-12723846	3.6	ENSMUSG00000020589	335276	ENSMUSG00000066629	188141	-0.08	-0.23	FALSE	NONCO14714	chr12:12711634-12723846	3.6	ENSMUSG00000020589	335276	ENSMUSG00000066629	188141	-0.08	-0.23	1	9	2.9	greenyellow	22.1	0.8346	ENSG00000261154	0.88	0.14	6.19	0.02	46.44	EMPTY	FALSE	FALSE	FALSE	TRUE	FALSE	FALSE
NONCO14719	chr12:13609467-13627655	0.4	ENSMUSG00000020576	25658	ENSMUSG00000020607	519945	-0.23	0.03	FALSE	NONCO14719	chr12:13609467-13627655	0.4	ENSMUSG00000020576	25658	ENSMUSG00000020607	519945	-0.23	0.03	1	15	41772	lightyellow	2.3	0.6822	EMPTY	0	0.14	0.02	0.07	0.05	EMPTY	FALSE	FALSE	FALSE	FALSE	FALSE	FALSE
NONCO14720	chr12:14929846-14930494	8.9	ENSMUSG00000050974	434690	ENSMUSG00000020601	861234	0.67	0.17	FALSE	NONCO14720	chr12:14929846-14930494	8.9	ENSMUSG00000050974	434690	ENSMUSG00000020601	861234	0.67	0.17	0.114	13	47.1	saddlebrown	13.6	0	EMPTY	0.99	0.14	6.98	0.05	21.91	EMPTY	FALSE	FALSE	FALSE	TRUE	TRUE	FALSE
NONCO14721	chr12:15728093-15729021	0.1	ENSMUSG00000050974	1232937	ENSMUSG00000020601	62707	-0.07	0.18	FALSE	NONCO14721	chr12:15728093-15729021	0.1	ENSMUSG00000050974	1232937	ENSMUSG00000020601	62707	-0.07	0.18	1	20	48399.2	lightsteelblue1	1.5	NA	EMPTY	0.99	0.14	6.96	0.47	2.11	Gm4804	FALSE	FALSE	FALSE	FALSE	TRUE	FALSE
NONCO14723	chr12:16205145-16232564	0.6	ENSMUSG00000020601	388269	ENSMUSG00000020593	303106	-0.24	0.02	FALSE	NONCO14723	chr12:16205145-16232564	0.6	ENSMUSG00000020601	388269	ENSMUSG00000020593	303106	-0.24	0.02	1	9	5.5	greenyellow	2.9	0.8099	EMPTY	0.11	0.14	0.79	0.04	2.88	EMPTY	FALSE	FALSE	FALSE	TRUE	FALSE	FALSE
NONCO14729	chr12:16844975-16850704	0.6	ENSMUSG00000057469	18233	ENSMUSG00000020580	44275	0.14	0.13	FALSE	NONCO14729	chr12:16844975-16850704	0.6	ENSMUSG00000057469	18233	ENSMUSG00000020580	44275	0.14	0.13	1	7	74637.7	darkorange	3.1	0.6559	EMPTY	0.03	0	Inf	0.2	0.15	EMPTY	FALSE	TRUE	FALSE	TRUE	FALSE	FALSE
NONCO1473	chr1:151518380-151520810	264.3	ENSMUSG00000026484	17426	ENSMUSG00000026483	50377	-0.19	-0.16	FALSE	NONCO1473	chr1:151518380-151520810	264.3	ENSMUSG00000026484	17426	ENSMUSG00000026483	50377	-0.19	-0.16	0.9921	4	2.3	brown	42.9	0.1103	EMPTY	0.25	0.98	0.26	0.16	1.53	Gm19503	FALSE	FALSE	FALSE	TRUE	TRUE	FALSE
NONCO14732	chr12:17036620-17037943	3.7	ENSMUSG00000071398	24894	ENSMUSG00000051726	134158	-0.27	0.27	FALSE	NONCO14732	chr12:17036620-17037943	3.7	ENSMUSG00000071398	24894	ENSMUSG00000051726	134158	-0.27	0.27	0.1817	0	109366	darkmagenta	4.6	0.1427	EMPTY	0.04	0.14	0.27	0.14	0.27	EMPTY	FALSE	FALSE	FALSE	FALSE	FALSE	FALSE
NONCO14737	chr12:17439848-17464527	0.5	ENSMUSG00000061458	9755	ENSMUSG00000011179	80347	-0.34	0.75	FALSE	NONCO14737	chr12:17439848-17464527	0.5	ENSMUSG00000061458	9755	ENSMUSG00000011179	80347	-0.34	0.75	0.3708	2	70348.4	midnightblue	2.3	0.3703	EMPTY	EMPTY	EMPTY	EMPTY	EMPTY	EMPTY	EMPTY	FALSE	FALSE	FALSE	FALSE	FALSE	FALSE
NONCO14738	chr12:17443421-17457988	3.4	ENSMUSG00000061458	13328	ENSMUSG00000011179	86886	-0.13	0.18	TRUE	NONCO14738	chr12:17443421-17457988	3.4	ENSMUSG00000061458	13328	ENSMUSG00000011179	86886	-0.13	0.18	0.0057	4	55.2	brown	11.2	0.0001	EMPTY	0.15	0.14	1.03	0.19	0.75	EMPTY	FALSE	FALSE	FALSE	FALSE	FALSE	FALSE
NONCO14742	chr12:18189663-18217834	39.2	ENSMUSG00000067356	263996	ENSMUSG00000073197	296905	0.03	0.07	FALSE	NONCO14742	chr12:18189663-18217834	39.2	ENSMUSG00000067356	263996	ENSMUSG00000073197	296905	0.03	0.07	1	7	1.8	turquoise	34.6	0.3222	EMPTY	0.73	0.08	9.59	0.42	1.75	Gm10480	FALSE	FALSE	FALSE	TRUE	TRUE	FALSE
NONCO14743	chr12:18193557-18222182	6.9	ENSMUSG00000067356	267890	ENSMUSG00000073197	292557	0.4	0.45	TRUE	NONCO14743	chr12:18193557-18222182	6.9	ENSMUSG00000067356	267890	ENSMUSG00000073197	292557	0.4	0.45	0.0069	2	2.5	darkmagenta	42.9	0.0077	ENSG00000276519	0.04	0.08	0.54	0.19	0.21	EMPTY	FALSE	FALSE	FALSE	FALSE	FALSE	FALSE
NONCO14745	chr12:18919006-18920055	0.6	ENSMUSG00000094947	64800	ENSMUSG00000093908	467754	EMPTY	EMPTY	FALSE	NONCO14745	chr12:18919006-18920055	0.6	ENSMUSG00000094947	64800	ENSMUSG00000093908	467754	EMPTY	EMPTY	0.9417	19	33239.6	blue	1.5	NA	EMPTY	EMPTY	EMPTY	EMPTY	EMPTY	EMPTY	EMPTY	FALSE	FALSE	FALSE	FALSE	FALSE	FALSE
NONCO14748	chr12:19824730-19830112	2.1	ENSMUSG00000095254	217467	ENSMUSG00000095470	124394	EMPTY	EMPTY	FALSE	NONCO14748	chr12:19824730-19830112	2.1	ENSMUSG00000095254	217467	ENSMUSG00000095470	124394	EMPTY	EMPTY	1	16	3.6	lightyellow	3.5	0.8843	EMPTY	0.96	0.01	78.99	0.94	1.02	EMPTY	FALSE	FALSE	FALSE	FALSE	FALSE	FALSE
NONCO14750	chr12:20248174-20276893	0.8	ENSMUSG00000096529	175958	ENSMUSG00000073184	139046	EMPTY	EMPTY	FALSE	NONCO14750	chr12:20248174-20276893	0.8	ENSMUSG00000096529	175958	ENSMUSG00000073184	139046	EMPTY	EMPTY	1	20	9.5	lightsteelblue1	11.6	0.79	EMPTY	0.17	0.14	1.21	0.55	0.31	EMPTY	FALSE	FALSE	FALSE	FALSE	FALSE	FALSE
NONCO14752	chr12:20636595-20636995	0	ENSMUSG00000073184	202897	ENSMUSG00000069755	262828	EMPTY	EMPTY	FALSE	NONCO14752	chr12:20636595-20636995	0	ENSMUSG00000073184	202897	ENSMUSG00000069755	262828	EMPTY	EMPTY	0.8278	5	22.6	brown	2.1	0.5243	EMPTY	0.55	0.14	3.86	0.39	1.41	EMPTY	FALSE	FALSE	FALSE	FALSE	FALSE	FALSE
NONCO14753	chr12:21015530-21016800	0.5	ENSMUSG00000069755	114664	ENSMUSG00000052632	94949	0.19	-0.17	FALSE	NONCO14753	chr12:21015530-21016800	0.5	ENSMUSG00000069755	114664	ENSMUSG00000052632	94949	0.19	-0.17	1	17	5.7	brown4	6.5	0.8165	EMPTY	0.62	0.14	4.36	0.27	2.28	EMPTY	FALSE	FALSE	FALSE	FALSE	FALSE	FALSE
NONCO14754	chr12:21090928-21092850	0.5	ENSMUSG00000069755	190062	ENSMUSG00000052632	18899	-0.29	0.04	FALSE	NONCO14754	chr12:21090928-21092850	0.5	ENSMUSG00000069755	190062	ENSMUSG00000052632	18899	-0.29	0.04	0.9921	2	46.6	brown	6	0.2952	ENSG00000260858	0.14	0	83.91	0.16	0.89	EMPTY	FALSE	FALSE	FALSE	FALSE	FALSE	FALSE
NONCO1476	chr1:152324057-152333710	1	ENSMUSG00000032666	233933	ENSMUSG00000014980	37026	0.06	-0.09	FALSE	NONCO1476	chr1:152324057-152333710	1	ENSMUSG00000032666	233933	ENSMUSG00000014980	37026	0.06	-0.09	1	11	161891	darkred	7.5	0.0089	EMPTY	0.01	0.14	0.07	0.02	0.49	EMPTY	FALSE	FALSE	FALSE	FALSE	FALSE	FALSE
NONCO14762	chr12:21954857-21979430	1.5	ENSMUSG00000076432	537221	ENSMUSG00000071362	1799483	EMPTY	EMPTY	FALSE	NONCO14762	chr12:21954857-21979430	1.5	ENSMUSG00000076432	537221	ENSMUSG00000071362	1799483	EMPTY	EMPTY	0.3708	20	4.5	turquoise	9.8	0.5679	ENSG00000278214	0.09	0.05	1.96	0.38	0.24	EMPTY	FALSE	FALSE	FALSE	FALSE	TRUE	FALSE
NONCO14764	chr12:22099041-22102219	1	ENSMUSG00000076432	681405	ENSMUSG00000071362	1676694	EMPTY	EMPTY	FALSE	NONCO14764	chr12:22099041-22102219	1	ENSMUSG00000076432	681405	ENSMUSG00000071362	1676694	EMPTY	EMPTY	1	20	7.7	greenyellow	1.3	NA	EMPTY	EMPTY	EMPTY	EMPTY	EMPTY	EMPTY	EMPTY	FALSE	FALSE	FALSE	FALSE	FALSE	FALSE
NONCO14765	chr12:22115756-22156646	0.1	ENSMUSG00000076432	698120	ENSMUSG00000071362	1622267	EMPTY	EMPTY	FALSE	NONCO14765	chr12:22115756-22156646	0.1	ENSMUSG00000076432	698120	ENSMUSG00000071362	1622267	EMPTY	EMPTY	1	9	10.6	brown4	2.1	0.6272	EMPTY	0.38	0.14	2.66	0.16	2.34	Gm4425	TRUE	FALSE	FALSE	FALSE	TRUE	FALSE
NONCO14766	chr12:22953997-23115285	0.1	ENSMUSG00000076432	1536361	ENSMUSG00000071362	663628	EMPTY	EMPTY	FALSE	NONCO14766	chr12:22953997-23115285	0.1	ENSMUSG00000076432	1536361	ENSMUSG00000071362	663628	EMPTY	EMPTY	1	9	16.4	greenyellow	1.4	NA	EMPTY	0.89	0.16	5.71	0.19	4.59	2410018L13Rik	TRUE	FALSE	FALSE	TRUE	TRUE	FALSE
NONCO14768	chr12:23258075-23261955	0.3	ENSMUSG00000076432	1840439	ENSMUSG00000071362	516958	EMPTY	EMPTY	FALSE	NONCO14768	chr12:23258075-23261955	0.3	ENSMUSG00000076432	1840439	ENSMUSG00000071362	516958	EMPTY	EMPTY	1	13	13.9	brown4	1.8	NA	EMPTY	0.1	0.89	0.11	0.02	4.77	EMPTY	FALSE	FALSE	FALSE	FALSE	FALSE	FALSE
NONCO14770	chr12:23898312-23903434	727.9	ENSMUSG00000071362	118048	ENSMUSG00000095329	65077	EMPTY	EMPTY	FALSE	NONCO14770	chr12:23898312-23903434	727.9	ENSMUSG00000071362	118048	ENSMUSG00000095329	65077	EMPTY	EMPTY	0.0548	22	2.6	turquoise	1103.4	0.0012	EMPTY	0.73	0.14	5.13	0.19	3.76	EMPTY	FALSE	FALSE	FALSE	TRUE	TRUE	FALSE
NONCO14786	chr12:26486039-26486851	0.1	ENSMUSG00000020638	6205	ENSMUSG00000063632	847414	-0.32	-0.07	FALSE	NONCO14786	chr12:26486039-26486851	0.1	ENSMUSG00000020638	6205	ENSMUSG00000063632	847414	-0.32	-0.07	0.3159	12	4	darkgreen	1.9	NA	EMPTY	0.97	0.14	6.87	0.1	9.71	EMPTY	FALSE	FALSE	FALSE	FALSE	TRUE	FALSE
NONCO14787	chr12:27050951-27083546	14.1	ENSMUSG00000020638	571117	ENSMUSG00000063632	250719	-0.15	-0.01	FALSE	NONCO14787	chr12:27050951-27083546	14.1	ENSMUSG00000020638	571117	ENSMUSG00000063632	250719	-0.15	-0.01	0.3708	5	4.7	midnightblue	41.1	0.1596	EMPTY	0.94	0.14	6.65	0.01	76.96	EMPTY	FALSE	TRUE	FALSE	TRUE	FALSE	FALSE
NONCO14797	chr12:29367991-29410472	0.1	ENSMUSG00000036613	500501	ENSMUSG00000061911	117913	0.43	0.34	FALSE	NONCO14797	chr12:29367991-29410472	0.1	ENSMUSG00000036613	500501	ENSMUSG00000061911	117913	0.43	0.34	0.129	11	21198	turquoise	0.9	NA	EMPTY	0.73	0.27	2.71	0.09	7.96	EMPTY	FALSE	FALSE	FALSE	TRUE	FALSE	FALSE
NONCO14809	chr12:31018602-31020346	8.1	ENSMUSG00000020669	58441	ENSMUSG00000036136	53623	EMPTY	EMPTY	FALSE	NONCO14809	chr12:31018602-31020346	8.1	ENSMUSG00000020669	58441	ENSMUSG00000036136	53623	EMPTY	EMPTY	0.1367	18	6.2	paleturquoise	58.6	0	EMPTY	0.32	0.14	2.27	0.14	2.27	EMPTY	FALSE	FALSE	FALSE	FALSE	TRUE	FALSE
NONCO14832	chr12:34198065-34234769	3.4	ENSMUSG00000035799	238249	ENSMUSG00000095406	55506	EMPTY	EMPTY	FALSE	NONCO14832	chr12:34198065-34234769	3.4	ENSMUSG00000035799	238249	ENSMUSG00000095406	55506	EMPTY	EMPTY	1	4	12.4	brown	18.7	0.1812	ENSG00000227043	0.07	0.05	1.45	0.1	0.69	EMPTY	FALSE	FALSE	FALSE	FALSE	FALSE	FALSE
NONCO14835	chr12:34804228-34804835	0.4	ENSMUSG00000004698	275340	ENSMUSG00000052376	68896	-0.12	-0.14	FALSE	NONCO14835	chr12:34804228-34804835	0.4	ENSMUSG00000004698	275340	ENSMUSG00000052376	68896	-0.12	-0.14	1	13	49132.2	white	2.5	0.3858	ENSG00000227043	0.02	0.14	0.16	0.1	0.23	EMPTY	FALSE	FALSE	FALSE	FALSE	FALSE	FALSE
NONCO14839	chr12:35773199-35773553	2.8	ENSMUSG00000019256	238162	ENSMUSG00000036231	152068	EMPTY	EMPTY	FALSE	NONCO14839	chr12:35773199-35773553	2.8	ENSMUSG00000019256	238162	ENSMUSG00000036231	152068	EMPTY	EMPTY	0.0954	16	22.5	darkgreen	5.2	0.0054	ENSG00000232964	0.99	1	0.99	0.04	24.92	EMPTY	FALSE	FALSE	FALSE	FALSE	FALSE	FALSE
NONCO14841	chr12:36055661-36061956	0.8	ENSMUSG00000020577	13162	ENSMUSG00000059301	28424	0.07	-0.04	FALSE	NONCO14841	chr12:36055661-36061956	0.8	ENSMUSG00000020577	13162	ENSMUSG00000059301	28424	0.07	-0.04	0.053	16	1.74281e+06	blue	32.1	NA	EMPTY	0.15	0.14	1.04	0.19	0.77	EMPTY	FALSE	FALSE	FALSE	FALSE	FALSE	FALSE
NONCO14852	chr12:39942610-39950754	5.6	ENSMUSG00000004151	1074396	ENSMUSG00000047446	54694	-0.04	0.09	FALSE	NONCO14852	chr12:39942610-39950754	5.6	ENSMUSG00000004151	1074396	ENSMUSG00000047446	54694	-0.04	0.09	0.9921	14	1.7	brown	64.3	0.9233	EMPTY	0.08	0.14	0.54	0.16	0.47	EMPTY	FALSE	FALSE	FALSE	TRUE	TRUE	FALSE
NONCO14854	chr12:39995976-39998883	0.7	ENSMUSG00000004151	1127762	ENSMUSG00000047446	6565	-0.42	-0.27	FALSE	NONCO14854	chr12:39995976-39998883	0.7	ENSMUSG00000004151	1127762	ENSMUSG00000047446	6565	-0.42	-0.27	1	8	44.8	midnightblue	4.1	0.2285	EMPTY	0.68	0.14	4.8	0.04	18.17	EMPTY	FALSE	FALSE	FALSE	FALSE	FALSE	FALSE
NONCO14859	chr12:44651030-44723783	0.5	ENSMUSG00000020598	49185	ENSMUSG00000046314	128706	-0.09	-0.28	FALSE	NONCO14859	chr12:44651030-44723783	0.5	ENSMUSG00000020598	49185	ENSMUSG00000046314	128706	-0.09	-0.28	1	11	8.6	darkorange	2.2	0.9616	EMPTY	EMPTY	EMPTY	EMPTY	EMPTY	EMPTY	EMPTY	FALSE	FALSE	FALSE	FALSE	FALSE	FALSE
NONCO1486	chr1:153413572-153414555	1.6	ENSMUSG00000026478	80787	ENSMUSG00000042708	10608	-0.05	-0.33	FALSE	NONCO1486	chr1:153413572-153414555	1.6	ENSMUSG00000026478	80787	ENSMUSG00000042708	10608	-0.05	-0.33	0.3482	8	6.1	lightyellow	15.3	0.2261	EMPTY	EMPTY	EMPTY	EMPTY	EMPTY	EMPTY	E330020D12Rik	FALSE	FALSE	FALSE	TRUE	FALSE	FALSE
NONCO1487	chr1:153619736-153620158	7.9	ENSMUSG00000042684	69692	ENSMUSG00000042671	32868	0.7	0.35	TRUE	NONCO1487	chr1:153619736-153620158	7.9	ENSMUSG00000042684	69692	ENSMUSG00000042671	32868	0.7	0.35	0.0149	22	5.6	turquoise	80.6	0.0136	EMPTY	0.9	0.14	6.33	0.17	5.43	Gm6652	FALSE	FALSE	FALSE	TRUE	FALSE	FALSE
NONCO14874	chr12:50942490-50944110	0.9	ENSMUSG00000002688	293268	ENSMUSG00000035293	403952	-0.4	-0.24	FALSE	NONCO14874	chr12:50942490-50944110	0.9	ENSMUSG00000002688	293268	ENSMUSG00000035293	403952	-0.4	-0.24	0.1085	20	122958	blue	4.6	0.2444	ENSG00000231768	0.53	0.01	66.55	0.04	12.35	EMPTY	FALSE	FALSE	FALSE	TRUE	FALSE	FALSE
NONCO14875	chr12:51025554-51030115	0.6	ENSMUSG00000002688	376332	ENSMUSG00000035293	317947	0.49	-0.22	FALSE	NONCO14875	chr12:51025554-51030115	0.6	ENSMUSG00000002688	376332	ENSMUSG00000035293	317947	0.49	-0.22	1	11	172485	darkred	4.8	0.2372	ENSG00000231768	0.28	0.05	5.58	0.98	0.28	EMPTY	FALSE	FALSE	FALSE	TRUE	FALSE	FALSE
NONCO14876	chr12:51126887-51144142	92.2	ENSMUSG00000002688	477665	ENSMUSG00000035293	203920	-0.01	0.46	FALSE	NONCO14876	chr12:51126887-51144142	92.2	ENSMUSG00000002688	477665	ENSMUSG00000035293	203920	-0.01	0.46	0.3708	16	3.4	brown	90.9	0.3514	ENSG00000224939	0.03	0.68	0.05	0.22	0.15	EMPTY	FALSE	FALSE	FALSE	TRUE	TRUE	FALSE
NONCO14899	chr12:54622552-54623199	2.1	ENSMUSG00000035105	418693	ENSMUSG00000044408	22176	0.19	0.62	FALSE	NONCO14899	chr12:54622552-54623199	2.1	ENSMUSG00000035105	418693	ENSMUSG00000044408	22176	0.19	0.62	0.0661	10	18.2	midnightblue	10.5	0.0001	EMPTY	0.97	0	1325.05	0.19	5.01	EMPTY	FALSE	FALSE	FALSE	FALSE	TRUE	FALSE
NONCO14911	chr12:56298085-56302295	3	ENSMUSG00000012076	428351	ENSMUSG00000021028	26012	-0.2	0.15	FALSE	NONCO14911	chr12:56298085-56302295	3	ENSMUSG00000012076	428351	ENSMUSG00000021028	26012	-0.2	0.15	1	11	2.4	darkred	8.8	0.9855	ENSG00000254580	0.95	0.94	1.01	0.19	4.9	EMPTY	FALSE	FALSE	FALSE	TRUE	FALSE	FALSE
NONCO1493	chr1:154003196-154006430	1.4	ENSMUSG00000026473	93474	ENSMUSG00000066797	194758	-0.11	-0.28	FALSE	NONCO1493	chr1:154003196-154006430	1.4	ENSMUSG00000026473	93474	ENSMUSG00000066797	194758	-0.11	-0.28	1	9	8.2	greenyellow	13.1	0.6811	EMPTY	0.25	0.02	15.92	0.03	10.09	Gm29291	FALSE	FALSE	FALSE	FALSE	FALSE	FALSE
NONCO1494	chr1:154037604-154117805	8.8	ENSMUSG00000026473	127882	ENSMUSG00000066797	83383	-0.1	-0.17	FALSE	NONCO1494	chr1:154037604-154117805	8.8	ENSMUSG00000026473	127882	ENSMUSG00000066797	83383	-0.1	-0.17	0.0954	1	6.5	brown	42.8	0.0044	ENSG00000279220	0.04	0.02	2.63	0.04	0.95	A830008E24Rik	FALSE	TRUE	TRUE	TRUE	FALSE	FALSE
NONCO14946	chr12:70366838-70367843	0.9	ENSMUSG00000021071	19225	ENSMUSG00000021072	85253	0.14	0.21	FALSE	NONCO14946	chr12:70366838-70367843	0.9	ENSMUSG00000021071	19225	ENSMUSG00000021072	85253	0.14	0.21	1	11	7.2	turquoise	4.6	0.7983	EMPTY	0.41	0.05	8.05	0.02	18.5	EMPTY	FALSE	FALSE	FALSE	TRUE	FALSE	FALSE
NONCO1495	chr1:154153392-154156675	2.3	ENSMUSG00000026473	243670	ENSMUSG00000066797	44513	0.33	-0.08	FALSE	NONCO1495	chr1:154153392-154156675	2.3	ENSMUSG00000026473	243670	ENSMUSG00000066797	44513	0.33	-0.08	0.7666	18	124.2	blue	17.2	0.047	ENSG00000279220	0.33	0.02	20.47	0.18	1.85	EMPTY	FALSE	FALSE	FALSE	FALSE	FALSE	FALSE
NONCO14958	chr12:72027277-72040149	0.3	ENSMUSG00000034574	34911	ENSMUSG00000043398	29470	-0.11	-0.26	FALSE	NONCO14958	chr12:72027277-72040149	0.3	ENSMUSG00000034574	34911	ENSMUSG00000043398	29470	-0.11	-0.26	0.7225	20	30218.6	turquoise	1.1	NA	EMPTY	0.02	0.24	0.08	0.21	0.09	EMPTY	FALSE	FALSE	FALSE	FALSE	FALSE	FALSE
NONCO14988	chr12:74350296-74363429	1.7	ENSMUSG00000079061	33903	ENSMUSG00000034402	533789	EMPTY	EMPTY	FALSE	NONCO14988	chr12:74350296-74363429	1.7	ENSMUSG00000079061	33903	ENSMUSG00000034402	533789	EMPTY	EMPTY	0.6291	18	499057	blue	13.3	0.0056	EMPTY	0.57	0	113.18	0.08	7.08	EMPTY	FALSE	FALSE	FALSE	FALSE	FALSE	TRUE
NONCO14989	chr12:74803844-74810455	6.1	ENSMUSG00000079061	487451	ENSMUSG00000034402	86763	EMPTY	EMPTY	TRUE	NONCO14989	chr12:74803844-74810455	6.1	ENSMUSG00000079061	487451	ENSMUSG00000034402	86763	EMPTY	EMPTY	0.0366	18	1.33297e+06	orange	28.2	0	EMPTY	EMPTY	EMPTY	EMPTY	EMPTY	EMPTY	EMPTY	FALSE	FALSE	FALSE	TRUE	FALSE	FALSE
NONCO14990	chr12:74828457-74833157	1.2	ENSMUSG00000079061	512064	ENSMUSG00000034402	64061	EMPTY	EMPTY	FALSE	NONCO14990	chr12:74828457-74833157	1.2	ENSMUSG00000079061	512064	ENSMUSG00000034402	64061	EMPTY	EMPTY	0.7225	4	10.7	greenyellow	12.5	0.2567	EMPTY	EMPTY	EMPTY	EMPTY	EMPTY	EMPTY	EMPTY	FALSE	FALSE	FALSE	FALSE	FALSE	FALSE
NONCO15	chr1:6428129-6441201	1.3	ENSMUSG00000087247	33399	ENSMUSG00000033740	46031	EMPTY	EMPTY	FALSE	NONCO15	chr1:6428129-6441201	1.3	ENSMUSG00000087247	33399	ENSMUSG00000033740	46031	EMPTY	EMPTY	1	17	2.8	lightsteelblue1	7.4	0.5889	EMPTY	0.99	0.01	83.69	0.24	4.13	RP23-76C20.4	FALSE	FALSE	FALSE	FALSE	FALSE	FALSE
NONCO150	chr1:42792436-42800366	0.5	ENSMUSG00000045515	89261	ENSMUSG00000060679	50868	0.17	-0.1	FALSE	NONCO150	chr1:42792436-42800366	0.5	ENSMUSG00000045515	89261	ENSMUSG00000060679	50868	0.17	-0.1	1	9	30.2	lightyellow	4	0.8482	EMPTY	0.09	0.22	0.4	0.14	0.63	EMPTY	FALSE	FALSE	FALSE	FALSE	FALSE	TRUE
NONCO15008	chr12:77004544-77006175	1.8	ENSMUSG00000059436	42297	ENSMUSG00000021065	231930	-0.26	0.03	TRUE	NONCO15008	chr12:77004544-77006175	1.8	ENSMUSG00000059436	42297	ENSMUSG00000021065	231930	-0.26	0.03	0.031	18	20.7	turquoise	20.3	0.0134	EMPTY	0	0.04	0.03	0.36	0	EMPTY	FALSE	FALSE	FALSE	FALSE	FALSE	FALSE
NONCO15013	chr12:77789900-77790266	1.3	ENSMUSG00000021065	313563	ENSMUSG00000047454	436390	0.11	0.08	FALSE	NONCO15013	chr12:77789900-77790266	1.3	ENSMUSG00000021065	313563	ENSMUSG00000047454	436390	0.11	0.08	1	13	24699.4	orange	1.1	NA	ENSG00000226063	0	0.12	0.02	0.03	0.11	EMPTY	FALSE	FALSE	FALSE	FALSE	FALSE	FALSE
NONCO1503	chr1:155022181-155026726	0.2	ENSMUSG00000004110	137681	ENSMUSG00000056708	69636	0.15	-0.33	FALSE	NONCO1503	chr1:155022181-155026726	0.2	ENSMUSG00000004110	137681	ENSMUSG00000056708	69636	0.15	-0.33	0.4726	18	56609.2	paleturquoise	2.3	0.5664	ENSG00000240440	0.14	0.14	0.95	0.08	1.76	EMPTY	FALSE	FALSE	FALSE	FALSE	FALSE	FALSE
NONCO15032	chr12:79917543-79924221	0.9	ENSMUSG00000059060	408888	ENSMUSG00000021127	183540	EMPTY	EMPTY	FALSE	NONCO15032	chr12:79917543-79924221	0.9	ENSMUSG00000059060	408888	ENSMUSG00000021127	183540	EMPTY	EMPTY	0.1367	20	91361.3	orange	2.5	0.0092	EMPTY	0.01	0.55	0.02	0.09	0.12	EMPTY	FALSE	FALSE	FALSE	TRUE	FALSE	FALSE
NONCO15033	chr12:79933809-79934728	0.6	ENSMUSG00000059060	425154	ENSMUSG00000021127	173033	EMPTY	EMPTY	FALSE	NONCO15033	chr12:79933809-79934728	0.6	ENSMUSG00000059060	425154	ENSMUSG00000021127	173033	EMPTY	EMPTY	1	13	6.7	brown4	6.5	0.9738	ENSG00000254842	0.29	0.07	4.15	0.46	0.63	EMPTY	FALSE	FALSE	FALSE	FALSE	FALSE	FALSE
NONCO15036	chr12:80119722-80132844	12.7	ENSMUSG00000021127	6710	ENSMUSG00000015143	34699	-0.07	0.21	FALSE	NONCO15036	chr12:80119722-80132844	12.7	ENSMUSG00000021127	6710	ENSMUSG00000015143	34699	-0.07	0.21	1	9	2.3	midnightblue	180.1	0.4989	ENSG00000175773	0	0.1	0	0.03	0.01	2310015A10Rik	FALSE	TRUE	FALSE	TRUE	FALSE	FALSE
NONCO1504	chr1:155063523-155083266	0.1	ENSMUSG00000004110	179023	ENSMUSG00000056708	13096	0.08	-0.27	FALSE	NONCO1504	chr1:155063523-155083266	0.1	ENSMUSG00000004110	179023	ENSMUSG00000056708	13096	0.08	-0.27	0.129	20	62977.4	paleturquoise	2.1	0.3056	ENSG00000240440	0.08	0.14	0.6	0.17	0.5	Gm9530	TRUE	FALSE	FALSE	TRUE	FALSE	FALSE
NONCO15047	chr12:80780130-80780504	6.5	ENSMUSG00000062961	19590	ENSMUSG00000021133	10029	0.22	-0.66	TRUE	NONCO15047	chr12:80780130-80780504	6.5	ENSMUSG00000062961	19590	ENSMUSG00000021133	10029	0.22	-0.66	0.0366	8	65.9	midnightblue	6.7	0	EMPTY	0.41	0.21	1.95	0.11	3.65	EMPTY	FALSE	FALSE	FALSE	TRUE	TRUE	FALSE
NONCO1507	chr1:155424569-155449782	1.1	ENSMUSG00000026469	7155	ENSMUSG00000033701	108339	0.04	-0.34	FALSE	NONCO1507	chr1:155424569-155449782	1.1	ENSMUSG00000026469	7155	ENSMUSG00000033701	108339	0.04	-0.34	0.2156	20	382010	blue	9.5	0.0058	EMPTY	0.05	0.14	0.33	0.25	0.19	EMPTY	FALSE	FALSE	FALSE	FALSE	FALSE	FALSE
NONCO1508	chr1:155520173-155531042	0.9	ENSMUSG00000026469	102759	ENSMUSG00000033701	27079	-0.52	-0.27	FALSE	NONCO1508	chr1:155520173-155531042	0.9	ENSMUSG00000026469	102759	ENSMUSG00000033701	27079	-0.52	-0.27	1	13	6.8	orange	18.6	0.7702	EMPTY	0.17	0.14	1.21	0.31	0.55	Gm5532	FALSE	FALSE	FALSE	TRUE	FALSE	FALSE
NONCO15093	chr12:85428698-85436324	5	ENSMUSG00000021248	53982	ENSMUSG00000021250	37567	0.26	0.39	FALSE	NONCO15093	chr12:85428698-85436324	5	ENSMUSG00000021248	53982	ENSMUSG00000021250	37567	0.26	0.39	0.4726	6	9.7	brown	22	0.2954	EMPTY	0.31	0.01	25.94	0.01	30.56	EMPTY	FALSE	FALSE	FALSE	TRUE	FALSE	FALSE
NONCO15095	chr12:85484049-85485989	0.3	ENSMUSG00000021250	6777	ENSMUSG00000034271	113117	-0.34	-0.34	FALSE	NONCO15095	chr12:85484049-85485989	0.3	ENSMUSG00000021250	6777	ENSMUSG00000034271	113117	-0.34	-0.34	0.7225	21	91428.4	turquoise	3	0.0187	ENSG00000255015	0.55	0.98	0.56	0.05	10.47	EMPTY	FALSE	FALSE	FALSE	TRUE	FALSE	FALSE
NONCO15104	chr12:86821459-86849956	1	ENSMUSG00000059114	57665	ENSMUSG00000034168	30748	EMPTY	EMPTY	FALSE	NONCO15104	chr12:86821459-86849956	1	ENSMUSG00000059114	57665	ENSMUSG00000034168	30748	EMPTY	EMPTY	0.3482	4	110036	lightyellow	6.4	0.1096	EMPTY	0.21	0.01	26.02	0.24	0.88	EMPTY	FALSE	FALSE	FALSE	TRUE	FALSE	TRUE
NONCO15105	chr12:86891404-86893011	0.3	ENSMUSG00000034168	6591	ENSMUSG00000034157	54033	0.07	0.02	FALSE	NONCO15105	chr12:86891404-86893011	0.3	ENSMUSG00000034168	6591	ENSMUSG00000034157	54033	0.07	0.02	1	11	74889.7	brown	4.1	0.7549	EMPTY	0.78	0	271.82	0.53	1.48	Gm26698	TRUE	FALSE	TRUE	TRUE	FALSE	FALSE
NONCO15106	chr12:86895126-86899632	3.6	ENSMUSG00000034168	10313	ENSMUSG00000034157	47412	0.18	-0.14	FALSE	NONCO15106	chr12:86895126-86899632	3.6	ENSMUSG00000034168	10313	ENSMUSG00000034157	47412	0.18	-0.14	1	2	9.9	blue	17.1	0.0804	EMPTY	0.11	0.41	0.28	0.06	1.99	EMPTY	FALSE	FALSE	FALSE	TRUE	FALSE	FALSE
NONCO15113	chr12:87420561-87420989	2.6	ENSMUSG00000021036	32207	ENSMUSG00000079036	4852	-0.38	0.18	TRUE	NONCO15113	chr12:87420561-87420989	2.6	ENSMUSG00000021036	32207	ENSMUSG00000079036	4852	-0.38	0.18	0.018	10	34.5	lightcyan	5.8	0.0013	EMPTY	0.99	1	0.99	0.11	9.05	EMPTY	FALSE	FALSE	FALSE	FALSE	TRUE	FALSE
NONCO15114	chr12:87765619-87766302	0.3	ENSMUSG00000093844	121153	ENSMUSG00000095724	6124	EMPTY	EMPTY	TRUE	NONCO15114	chr12:87765619-87766302	0.3	ENSMUSG00000093844	121153	ENSMUSG00000095724	6124	EMPTY	EMPTY	0.0366	13	134733	saddlebrown	5.7	0.0016	EMPTY	0.89	0.14	6.3	0.7	1.27	EMPTY	FALSE	FALSE	FALSE	FALSE	TRUE	FALSE
NONCO15146	chr12:98078526-98108593	0.6	ENSMUSG00000047414	2293312	ENSMUSG00000021003	93712	0.12	0.35	FALSE	NONCO15146	chr12:98078526-98108593	0.6	ENSMUSG00000047414	2293312	ENSMUSG00000021003	93712	0.12	0.35	1	7	120789	salmon4	4.1	0.0401	EMPTY	0.21	0	76.13	0.16	1.32	EMPTY	FALSE	TRUE	FALSE	FALSE	FALSE	FALSE
NONCO15152	chr12:99168691-99171675	0.4	ENSMUSG00000021013	185454	ENSMUSG00000033713	23306	0	0.48	FALSE	NONCO15152	chr12:99168691-99171675	0.4	ENSMUSG00000021013	185454	ENSMUSG00000033713	23306	0	0.48	0.8745	22	111508	darkred	3.3	0.0594	EMPTY	0.06	0.5	0.12	0.01	4.06	EMPTY	FALSE	FALSE	FALSE	FALSE	FALSE	FALSE
NONCO15156	chr12:99626054-99627920	4.3	ENSMUSG00000033713	175944	ENSMUSG00000021176	89612	0.02	-0.29	FALSE	NONCO15156	chr12:99626054-99627920	4.3	ENSMUSG00000033713	175944	ENSMUSG00000021176	89612	0.02	-0.29	0.6669	5	27.2	midnightblue	14.1	0.0004	EMPTY	0	0.09	0	0.11	0	1700064M15Rik	FALSE	FALSE	FALSE	TRUE	FALSE	FALSE
NONCO15161	chr12:100220424-100226803	1	ENSMUSG00000001175	10619	ENSMUSG00000033530	73969	-0.45	-0.44	FALSE	NONCO15161	chr12:100220424-100226803	1	ENSMUSG00000001175	10619	ENSMUSG00000033530	73969	-0.45	-0.44	0.7666	20	367897	turquoise	14.5	0.0007	EMPTY	0.09	0.04	2.11	0.09	1.08	EMPTY	FALSE	FALSE	FALSE	TRUE	FALSE	FALSE
NONCO15163	chr12:100238519-100242266	0.7	ENSMUSG00000001175	28714	ENSMUSG00000033530	58506	-0.1	-0.02	FALSE	NONCO15163	chr12:100238519-100242266	0.7	ENSMUSG00000001175	28714	ENSMUSG00000033530	58506	-0.1	-0.02	1	11	3.6	darkorange	13.2	0.9677	EMPTY	0.06	0.04	1.24	0.04	1.49	EMPTY	FALSE	TRUE	FALSE	TRUE	FALSE	FALSE
NONCO15188	chr12:104228875-104229953	13.1	ENSMUSG00000066363	7747	ENSMUSG00000041481	6293	EMPTY	EMPTY	FALSE	NONCO15188	chr12:104228875-104229953	13.1	ENSMUSG00000066363	7747	ENSMUSG00000041481	6293	EMPTY	EMPTY	0.3708	21	3.8	paleturquoise	128.5	0	EMPTY	0.98	0.14	6.91	0.06	15.87	Gm8918	FALSE	FALSE	FALSE	FALSE	TRUE	FALSE
NONCO15193	chr12:105389256-105404562	1.1	ENSMUSG00000041359	166464	ENSMUSG00000094910	49295	EMPTY	EMPTY	FALSE	NONCO15193	chr12:105389256-105404562	1.1	ENSMUSG00000041359	166464	ENSMUSG00000094910	49295	EMPTY	EMPTY	0.2696	22	5	thistle2	17.1	0.1955	EMPTY	0	0.14	0	0.12	0	EMPTY	FALSE	FALSE	FALSE	TRUE	FALSE	FALSE
NONCO15199	chr12:105900176-105906806	1.1	ENSMUSG00000021111	61233	ENSMUSG00000021115	103458	-0.29	0.08	FALSE	NONCO15199	chr12:105900176-105906806	1.1	ENSMUSG00000021111	61233	ENSMUSG00000021115	103458	-0.29	0.08	1	22	80541.6	brown4	4.5	0.2691	EMPTY	0.1	0.38	0.27	0.02	4.51	EMPTY	FALSE	FALSE	TRUE	TRUE	FALSE	FALSE
NONCO15200	chr12:106144676-106161922	0.6	ENSMUSG00000021115	67267	ENSMUSG00000060375	1326711	EMPTY	EMPTY	FALSE	NONCO15200	chr12:106144676-106161922	0.6	ENSMUSG00000021115	67267	ENSMUSG00000060375	1326711	EMPTY	EMPTY	0.3708	16	229993	orange	8.5	0.0095	EMPTY	0.01	0.01	1.26	0.02	0.73	EMPTY	FALSE	FALSE	FALSE	FALSE	FALSE	FALSE
NONCO15209	chr12:107689441-107742651	0.4	ENSMUSG00000060375	199806	ENSMUSG00000048251	167753	EMPTY	EMPTY	FALSE	NONCO15209	chr12:107689441-107742651	0.4	ENSMUSG00000060375	199806	ENSMUSG00000048251	167753	EMPTY	EMPTY	0.4073	0	108244	darkred	2.8	0.1261	EMPTY	0.01	0.04	0.16	0.06	0.1	EMPTY	FALSE	FALSE	FALSE	FALSE	FALSE	FALSE
NONCO1522	chr1:157437774-157440640	1.3	ENSMUSG00000070565	25180	ENSMUSG00000033488	17938	-0.15	-0.06	FALSE	NONCO1522	chr1:157437774-157440640	1.3	ENSMUSG00000070565	25180	ENSMUSG00000033488	17938	-0.15	-0.06	0.9417	2	100230	salmon4	5	0.3569	EMPTY	0.72	0.14	5.07	0.12	6.24	EMPTY	FALSE	FALSE	FALSE	TRUE	FALSE	TRUE
NONCO15233	chr12:109493402-109540095	1.1	ENSMUSG00000040856	30067	ENSMUSG00000085925	49100	-0.42	0.71	FALSE	NONCO15233	chr12:109493402-109540095	1.1	ENSMUSG00000040856	30067	ENSMUSG00000085925	49100	-0.42	0.71	1	15	20.9	paleturquoise	8	NA	EMPTY	0.7	0.61	1.15	0.31	2.23	EMPTY	FALSE	FALSE	FALSE	TRUE	FALSE	FALSE
NONCO15235	chr12:109543734-109572180	108.9	ENSMUSG00000040856	80399	ENSMUSG00000085925	17015	-0.4	0.51	FALSE	NONCO15235	chr12:109543734-109572180	108.9	ENSMUSG00000040856	80399	ENSMUSG00000085925	17015	-0.4	0.51	0.114	18	18.4	blue	204.3	0	EMPTY	0.1	0.02	4.62	0	50.01	Gm26906,Meg3	FALSE	FALSE	TRUE	TRUE	FALSE	FALSE
NONCO15240	chr12:109649561-109662141	46.5	ENSMUSG00000085925	49232	ENSMUSG00000075707	616928	0.12	-0.21	FALSE	NONCO15240	chr12:109649561-109662141	46.5	ENSMUSG00000085925	49232	ENSMUSG00000075707	616928	0.12	-0.21	0.5782	5	8.3	brown	11.2	0.1116	EMPTY	0.01	0.09	0.14	0.03	0.48	Rian	FALSE	TRUE	TRUE	TRUE	FALSE	TRUE
NONCO15241	chr12:109665809-109668991	1.6	ENSMUSG00000085925	65480	ENSMUSG00000075707	610078	0.42	0.01	FALSE	NONCO15241	chr12:109665809-109668991	1.6	ENSMUSG00000085925	65480	ENSMUSG00000075707	610078	0.42	0.01	1	13	10.5	turquoise	20.2	0.2985	EMPTY	0.01	0.79	0.01	0.02	0.66	EMPTY	FALSE	FALSE	FALSE	TRUE	FALSE	FALSE
NONCO15243	chr12:109743431-109747366	1.5	ENSMUSG00000085925	143102	ENSMUSG00000075707	531703	0.5	-0.05	FALSE	NONCO15243	chr12:109743431-109747366	1.5	ENSMUSG00000085925	143102	ENSMUSG00000075707	531703	0.5	-0.05	1	13	4.8	brown	13.5	0.6922	ENSG00000259362	0.05	0.16	0.31	0.16	0.31	Mirg	FALSE	TRUE	FALSE	TRUE	FALSE	FALSE
NONCO15244	chr12:109966973-110040796	0.9	ENSMUSG00000085925	366644	ENSMUSG00000075707	238273	-0.22	0.02	FALSE	NONCO15244	chr12:109966973-110040796	0.9	ENSMUSG00000085925	366644	ENSMUSG00000075707	238273	-0.22	0.02	1	17	60311.5	brown4	3.2	0.413	ENSG00000259362	0.01	0.02	0.31	0.43	0.02	EMPTY	FALSE	FALSE	FALSE	TRUE	FALSE	FALSE
NONCO15245	chr12:110225520-110227991	0.1	ENSMUSG00000085925	625191	ENSMUSG00000075707	51078	0.02	0.33	FALSE	NONCO15245	chr12:110225520-110227991	0.1	ENSMUSG00000085925	625191	ENSMUSG00000075707	51078	0.02	0.33	1	13	31742.8	turquoise	1.5	NA	EMPTY	0.2	0.14	1.44	0.02	11.08	EMPTY	FALSE	FALSE	FALSE	FALSE	FALSE	FALSE
NONCO15247	chr12:110315923-110316439	197.2	ENSMUSG00000075707	34827	ENSMUSG00000017843	169301	-0.48	-0.57	FALSE	NONCO15247	chr12:110315923-110316439	197.2	ENSMUSG00000075707	34827	ENSMUSG00000017843	169301	-0.48	-0.57	0.193	6	2.3	midnightblue	391	0	EMPTY	EMPTY	EMPTY	EMPTY	EMPTY	EMPTY	EMPTY	FALSE	FALSE	FALSE	TRUE	FALSE	FALSE
NONCO15250	chr12:110449623-110450999	5.3	ENSMUSG00000075707	168527	ENSMUSG00000017843	34741	-0.35	-0.53	FALSE	NONCO15250	chr12:110449623-110450999	5.3	ENSMUSG00000075707	168527	ENSMUSG00000017843	34741	-0.35	-0.53	0.5013	8	7.7	midnightblue	7.5	0.0397	EMPTY	0.05	0.01	3.65	0.03	1.67	EMPTY	FALSE	FALSE	FALSE	FALSE	FALSE	FALSE
NONCO15283	chr12:112692582-112693459	0.8	ENSMUSG00000037638	9836	ENSMUSG00000072825	28716	EMPTY	EMPTY	FALSE	NONCO15283	chr12:112692582-112693459	0.8	ENSMUSG00000037638	9836	ENSMUSG00000072825	28716	EMPTY	EMPTY	1	9	6.6	salmon4	7.9	0.9116	EMPTY	0.04	0	37.23	0.03	1.16	EMPTY	FALSE	FALSE	FALSE	TRUE	FALSE	FALSE
NONCO15295	chr12:113202749-113203672	0.3	ENSMUSG00000049036	13230	ENSMUSG00000051804	285840	EMPTY	EMPTY	FALSE	NONCO15295	chr12:113202749-113203672	0.3	ENSMUSG00000049036	13230	ENSMUSG00000051804	285840	EMPTY	EMPTY	1	11	77924.5	white	3.1	0.5941	EMPTY	0.37	0.14	2.57	0.25	1.46	EMPTY	FALSE	FALSE	FALSE	FALSE	FALSE	FALSE
NONCO15296	chr12:113407025-113430455	1.8	ENSMUSG00000049036	217506	ENSMUSG00000051804	59057	EMPTY	EMPTY	FALSE	NONCO15296	chr12:113407025-113430455	1.8	ENSMUSG00000049036	217506	ENSMUSG00000051804	59057	EMPTY	EMPTY	0.3708	22	2.4	turquoise	11.5	0.6933	EMPTY	0.35	0.14	2.43	0.14	2.44	Ighd,Ighm	FALSE	FALSE	FALSE	TRUE	FALSE	FALSE
NONCO15297	chr12:115982365-116031147	7	ENSMUSG00000096466	18170	ENSMUSG00000042063	16578	EMPTY	EMPTY	FALSE	NONCO15297	chr12:115982365-116031147	7	ENSMUSG00000096466	18170	ENSMUSG00000042063	16578	EMPTY	EMPTY	0.7666	8	4.6	midnightblue	3.6	0.3519	ENSG00000259503	EMPTY	EMPTY	EMPTY	EMPTY	EMPTY	EMPTY	FALSE	FALSE	FALSE	FALSE	FALSE	FALSE
NONCO15300	chr12:116162957-116164262	10.2	ENSMUSG00000011171	16697	ENSMUSG00000042050	42789	0.25	-0.07	FALSE	NONCO15300	chr12:116162957-116164262	10.2	ENSMUSG00000011171	16697	ENSMUSG00000042050	42789	0.25	-0.07	0.0661	17	20.8	darkgreen	84.9	0	ENSG00000245750	0.51	0.01	49.49	0.15	3.46	EMPTY	FALSE	FALSE	FALSE	TRUE	TRUE	FALSE
NONCO15301	chr12:116166236-116198566	0.8	ENSMUSG00000011171	19976	ENSMUSG00000042050	8485	0.19	-0.34	FALSE	NONCO15301	chr12:116166236-116198566	0.8	ENSMUSG00000011171	19976	ENSMUSG00000042050	8485	0.19	-0.34	0.1539	0	4.3	turquoise	11.2	0.6042	ENSG00000245750	0.2	0.01	26.48	0.07	2.78	EMPTY	FALSE	FALSE	FALSE	FALSE	FALSE	FALSE
NONCO15306	chr12:116383801-116385973	1	ENSMUSG00000021171	10706	ENSMUSG00000042029	19430	0.09	0	FALSE	NONCO15306	chr12:116383801-116385973	1	ENSMUSG00000021171	10706	ENSMUSG00000042029	19430	0.09	0	1	9	6.3	brown4	13.4	0.9189	EMPTY	0.19	0.01	15.66	0.42	0.47	EMPTY	FALSE	FALSE	FALSE	FALSE	FALSE	TRUE
NONCO15318	chr12:119352315-119353757	16.1	ENSMUSG00000021908	88044	ENSMUSG00000041886	89654	-0.53	-0.07	FALSE	NONCO15318	chr12:119352315-119353757	16.1	ENSMUSG00000021908	88044	ENSMUSG00000041886	89654	-0.53	-0.07	0.3708	10	25.7	white	2.7	0.2634	EMPTY	0.51	0.02	20.67	0.1	4.95	EMPTY	FALSE	FALSE	FALSE	TRUE	TRUE	FALSE
NONCO15322	chr13:3478185-3501198	3.7	ENSMUSG00000096107	116653	ENSMUSG00000021218	36878	EMPTY	EMPTY	FALSE	NONCO15322	chr13:3478185-3501198	3.7	ENSMUSG00000096107	116653	ENSMUSG00000021218	36878	EMPTY	EMPTY	0.2696	2	8.5	darkmagenta	59.4	0.0017	EMPTY	0.01	0.01	0.73	0.09	0.08	2810429I04Rik	TRUE	FALSE	TRUE	TRUE	FALSE	FALSE
NONCO15327	chr13:4561312-4565835	4.5	ENSMUSG00000054757	37969	ENSMUSG00000021207	8241	EMPTY	EMPTY	FALSE	NONCO15327	chr13:4561312-4565835	4.5	ENSMUSG00000054757	37969	ENSMUSG00000021207	8241	EMPTY	EMPTY	0.1085	22	26.6	turquoise	10.2	0.1855	ENSG00000259471	EMPTY	EMPTY	EMPTY	EMPTY	EMPTY	EMPTY	FALSE	FALSE	FALSE	TRUE	FALSE	FALSE
NONCO15335	chr13:9223541-9226881	1.2	ENSMUSG00000033499	49091	ENSMUSG00000048264	49648	0.31	0.14	TRUE	NONCO15335	chr13:9223541-9226881	1.2	ENSMUSG00000033499	49091	ENSMUSG00000048264	49648	0.31	0.14	0.018	8	45	brown	3.5	0.0133	EMPTY	0.74	0.03	25.63	0.16	4.58	EMPTY	FALSE	FALSE	FALSE	FALSE	FALSE	FALSE
NONCO15351	chr13:13231472-13232968	247.9	ENSMUSG00000055360	39550	ENSMUSG00000021306	124656	EMPTY	EMPTY	TRUE	NONCO15351	chr13:13231472-13232968	247.9	ENSMUSG00000055360	39550	ENSMUSG00000021306	124656	EMPTY	EMPTY	0.0214	9	3.5	midnightblue	2511	0	EMPTY	0.58	0.1	6.06	0.03	20.46	Gm2423	FALSE	FALSE	FALSE	TRUE	TRUE	FALSE
NONCO15352	chr13:13343471-13348026	0.2	ENSMUSG00000055360	151549	ENSMUSG00000021306	9598	EMPTY	EMPTY	FALSE	NONCO15352	chr13:13343471-13348026	0.2	ENSMUSG00000055360	151549	ENSMUSG00000021306	9598	EMPTY	EMPTY	1	11	8919.6	yellowgreen	0.5	NA	EMPTY	1	0.12	8.16	0.3	3.3	EMPTY	FALSE	FALSE	FALSE	FALSE	FALSE	FALSE
NONCO15358	chr13:14719070-14720030	0.3	ENSMUSG00000039182	80869	ENSMUSG00000021318	743206	0.21	0.28	FALSE	NONCO15358	chr13:14719070-14720030	0.3	ENSMUSG00000039182	80869	ENSMUSG00000021318	743206	0.21	0.28	1	20	37929.2	paleturquoise	1.9	NA	ENSG00000259727	EMPTY	EMPTY	EMPTY	EMPTY	EMPTY	EMPTY	FALSE	FALSE	FALSE	FALSE	FALSE	FALSE
NONCO15377	chr13:20748348-20749043	0.2	ENSMUSG00000041112	141821	ENSMUSG00000021322	45077	EMPTY	EMPTY	FALSE	NONCO15377	chr13:20748348-20749043	0.2	ENSMUSG00000041112	141821	ENSMUSG00000021322	45077	EMPTY	EMPTY	0.2979	11	5.5	darkgreen	1.7	NA	EMPTY	0.76	0.18	4.21	0.19	3.94	EMPTY	FALSE	FALSE	FALSE	FALSE	FALSE	FALSE
NONCO15382	chr13:21897186-21907884	0.2	ENSMUSG00000069303	59657	ENSMUSG00000006720	37211	EMPTY	EMPTY	FALSE	NONCO15382	chr13:21897186-21907884	0.2	ENSMUSG00000069303	59657	ENSMUSG00000006720	37211	EMPTY	EMPTY	0.2287	22	133719	turquoise	5.2	0.0857	EMPTY	0.17	0.01	29.65	0.29	0.6	EMPTY	FALSE	FALSE	FALSE	TRUE	FALSE	FALSE
NONCO15387	chr13:22145249-22145888	0.6	ENSMUSG00000099611	42585	ENSMUSG00000095916	32799	EMPTY	EMPTY	FALSE	NONCO15387	chr13:22145249-22145888	0.6	ENSMUSG00000099611	42585	ENSMUSG00000095916	32799	EMPTY	EMPTY	1	7	79167.1	brown4	2.6	0.1763	EMPTY	0.03	0.14	0.22	0	7.36	EMPTY	FALSE	FALSE	FALSE	FALSE	FALSE	FALSE
NONCO15394	chr13:23445253-23445949	0.9	ENSMUSG00000036376	21388	ENSMUSG00000000706	11044	-0.01	-0.19	FALSE	NONCO15394	chr13:23445253-23445949	0.9	ENSMUSG00000036376	21388	ENSMUSG00000000706	11044	-0.01	-0.19	1	7	108545	brown4	4	0.5333	EMPTY	EMPTY	EMPTY	EMPTY	EMPTY	EMPTY	EMPTY	FALSE	FALSE	TRUE	TRUE	FALSE	FALSE
NONCO15403	chr13:24741232-24746592	1.2	ENSMUSG00000036006	7417	ENSMUSG00000006715	5254	0.34	-0.09	FALSE	NONCO15403	chr13:24741232-24746592	1.2	ENSMUSG00000036006	7417	ENSMUSG00000006715	5254	0.34	-0.09	0.5013	22	82.5	blue	9.4	0.2173	EMPTY	0.27	0.05	5.84	0.36	0.75	1700016G14Rik	TRUE	FALSE	FALSE	TRUE	FALSE	FALSE
NONCO15413	chr13:30003410-30035507	4.7	ENSMUSG00000016477	17743	ENSMUSG00000038732	100992	-0.01	-0.19	FALSE	NONCO15413	chr13:30003410-30035507	4.7	ENSMUSG00000016477	17743	ENSMUSG00000038732	100992	-0.01	-0.19	1	0	117.9	violet	11.9	0.0421	EMPTY	0.24	0.03	7.18	0.01	41.96	EMPTY	FALSE	FALSE	FALSE	TRUE	FALSE	FALSE
NONCO15426	chr13:32451786-32493288	0.3	ENSMUSG00000038372	113075	ENSMUSG00000044951	207540	0.13	0.29	FALSE	NONCO15426	chr13:32451786-32493288	0.3	ENSMUSG00000038372	113075	ENSMUSG00000044951	207540	0.13	0.29	1	13	6	yellowgreen	1.6	NA	EMPTY	0.03	0.02	1.28	0.17	0.16	EMPTY	FALSE	FALSE	FALSE	TRUE	FALSE	FALSE
NONCO15433	chr13:34116515-34118618	0.7	ENSMUSG00000058672	38508	ENSMUSG00000045136	8391	0.23	0.04	TRUE	NONCO15433	chr13:34116515-34118618	0.7	ENSMUSG00000058672	38508	ENSMUSG00000045136	8391	0.23	0.04	0.8745	18	116404	lightsteelblue1	4.6	0.0165	EMPTY	0.04	0.01	6.24	0.3	0.13	EMPTY	FALSE	FALSE	FALSE	FALSE	FALSE	FALSE
NONCO15438	chr13:36612958-36653245	1.4	ENSMUSG00000021420	75367	ENSMUSG00000039114	72381	0.13	0.23	FALSE	NONCO15438	chr13:36612958-36653245	1.4	ENSMUSG00000021420	75367	ENSMUSG00000039114	72381	0.13	0.23	0.7225	22	30.2	brown4	8.9	0.0314	EMPTY	0.08	0.01	8.8	0.1	0.82	EMPTY	FALSE	FALSE	FALSE	FALSE	FALSE	FALSE
NONCO15442	chr13:37581093-37589284	1.4	ENSMUSG00000021423	162058	ENSMUSG00000039087	189117	-0.07	0.28	FALSE	NONCO15442	chr13:37581093-37589284	1.4	ENSMUSG00000021423	162058	ENSMUSG00000039087	189117	-0.07	0.28	0.2156	22	222012	brown	4.9	NA	EMPTY	0	0.32	0.01	0	0.99	EMPTY	FALSE	FALSE	FALSE	TRUE	FALSE	FALSE
NONCO1545	chr1:161224879-161229804	0.3	ENSMUSG00000044835	54382	ENSMUSG00000026701	10309	0.29	0.43	FALSE	NONCO1545	chr1:161224879-161229804	0.3	ENSMUSG00000044835	54382	ENSMUSG00000026701	10309	0.29	0.43	1	22	80709.2	turquoise	3.3	0.2487	EMPTY	0.15	0.03	4.54	0.04	3.83	EMPTY	FALSE	FALSE	FALSE	TRUE	FALSE	FALSE
NONCO15452	chr13:38753956-38775882	0.8	ENSMUSG00000001707	94929	ENSMUSG00000021432	156259	-0.04	-0.44	FALSE	NONCO15452	chr13:38753956-38775882	0.8	ENSMUSG00000001707	94929	ENSMUSG00000021432	156259	-0.04	-0.44	1	15	2.6	darkred	3.7	0.993	EMPTY	0.02	0	7.71	0.01	2.64	EMPTY	FALSE	FALSE	FALSE	FALSE	FALSE	FALSE
NONCO15458	chr13:40987877-40995321	0.9	ENSMUSG00000021360	26987	ENSMUSG00000038683	5703	0.06	-0.38	FALSE	NONCO15458	chr13:40987877-40995321	0.9	ENSMUSG00000021360	26987	ENSMUSG00000038683	5703	0.06	-0.38	0.4073	18	526606	blue	17.6	0.0876	EMPTY	0.02	0.01	3.97	0.08	0.27	EMPTY	FALSE	FALSE	FALSE	FALSE	FALSE	FALSE
NONCO1546	chr1:161228321-161230285	0.1	ENSMUSG00000044835	57824	ENSMUSG00000026701	9828	0.17	0.17	FALSE	NONCO1546	chr1:161228321-161230285	0.1	ENSMUSG00000044835	57824	ENSMUSG00000026701	9828	0.17	0.17	1	15	41825.9	brown4	1.6	NA	ENSG00000260804	0.2	0.03	6.01	0.28	0.72	EMPTY	FALSE	FALSE	FALSE	FALSE	FALSE	FALSE
NONCO15465	chr13:41865907-41917282	6.8	ENSMUSG00000058022	18224	ENSMUSG00000021366	134740	-0.05	-0.18	FALSE	NONCO15465	chr13:41865907-41917282	6.8	ENSMUSG00000058022	18224	ENSMUSG00000021366	134740	-0.05	-0.18	1	9	3.2	turquoise	39.1	0.8801	ENSG00000235357	EMPTY	EMPTY	EMPTY	EMPTY	EMPTY	EMPTY	FALSE	FALSE	FALSE	TRUE	FALSE	TRUE
NONCO15466	chr13:42407498-42672857	0.8	ENSMUSG00000021367	99510	ENSMUSG00000054728	7767	0.75	-0.21	FALSE	NONCO15466	chr13:42407498-42672857	0.8	ENSMUSG00000021367	99510	ENSMUSG00000054728	7767	0.75	-0.21	0.7666	16	9.8	blue	2.3	0.3935	ENSG00000235357	0.41	0.04	11.1	0.06	6.62	EMPTY	FALSE	FALSE	FALSE	FALSE	FALSE	FALSE
NONCO15474	chr13:43517585-43531613	0.3	ENSMUSG00000038546	36613	ENSMUSG00000021371	6800	EMPTY	EMPTY	FALSE	NONCO15474	chr13:43517585-43531613	0.3	ENSMUSG00000038546	36613	ENSMUSG00000021371	6800	EMPTY	EMPTY	0.9921	0	89825.6	turquoise	3.3	0.2056	EMPTY	0.19	0.11	1.77	0.03	6.6	EMPTY	FALSE	FALSE	FALSE	TRUE	FALSE	FALSE
NONCO15476	chr13:43700074-43719042	1.5	ENSMUSG00000044164	29130	ENSMUSG00000015396	66066	0.05	0.41	FALSE	NONCO15476	chr13:43700074-43719042	1.5	ENSMUSG00000044164	29130	ENSMUSG00000015396	66066	0.05	0.41	1	7	4.2	greenyellow	9.4	0.6987	EMPTY	0	0.12	0	0.08	0.01	EMPTY	FALSE	FALSE	TRUE	FALSE	FALSE	FALSE
NONCO15478	chr13:43864679-43869534	0.6	ENSMUSG00000015396	61550	ENSMUSG00000038518	859941	0.49	-0.11	FALSE	NONCO15478	chr13:43864679-43869534	0.6	ENSMUSG00000015396	61550	ENSMUSG00000038518	859941	0.49	-0.11	1	17	108842	orange	4.4	0.4775	EMPTY	0.13	0.01	12.89	0.05	2.7	EMPTY	FALSE	TRUE	FALSE	TRUE	FALSE	FALSE
NONCO15479	chr13:44121121-44125179	0.4	ENSMUSG00000015396	317992	ENSMUSG00000038518	604296	-0.01	0.16	FALSE	NONCO15479	chr13:44121121-44125179	0.4	ENSMUSG00000015396	317992	ENSMUSG00000038518	604296	-0.01	0.16	0.2696	16	147099	sienna3	4.5	0.0222	EMPTY	0.1	0.01	8.05	0.02	5.07	Gm5083	TRUE	FALSE	FALSE	TRUE	FALSE	FALSE
NONCO15481	chr13:44239424-44282615	0.4	ENSMUSG00000015396	436295	ENSMUSG00000038518	446860	0.21	0.05	FALSE	NONCO15481	chr13:44239424-44282615	0.4	ENSMUSG00000015396	436295	ENSMUSG00000038518	446860	0.21	0.05	1	17	6.5	greenyellow	2.3	0.9905	EMPTY	0.01	0.04	0.31	0.05	0.23	EMPTY	FALSE	FALSE	FALSE	TRUE	FALSE	FALSE
NONCO15504	chr13:47844075-47851520	0.8	ENSMUSG00000038068	596085	ENSMUSG00000021379	409908	0.25	-0.03	FALSE	NONCO15504	chr13:47844075-47851520	0.8	ENSMUSG00000038068	596085	ENSMUSG00000021379	409908	0.25	-0.03	0.9921	1	89912.7	darkred	4.6	0.7303	EMPTY	0	0	4.06	0.06	0.07	EMPTY	FALSE	FALSE	FALSE	FALSE	FALSE	FALSE
NONCO15506	chr13:48132079-48149031	0.5	ENSMUSG00000038068	884089	ENSMUSG00000021379	112397	0.09	-0.05	FALSE	NONCO15506	chr13:48132079-48149031	0.5	ENSMUSG00000038068	884089	ENSMUSG00000021379	112397	0.09	-0.05	1	15	4.3	lightcyan	5.4	0.9142	ENSG00000259234	0.04	0.01	5.94	0.25	0.18	EMPTY	FALSE	FALSE	FALSE	FALSE	FALSE	TRUE
NONCO15507	chr13:48168762-48169752	0.7	ENSMUSG00000038068	920772	ENSMUSG00000021379	91676	-0.13	0.15	FALSE	NONCO15507	chr13:48168762-48169752	0.7	ENSMUSG00000038068	920772	ENSMUSG00000021379	91676	-0.13	0.15	0.6669	6	144876	darkorange	5.9	0.1044	ENSG00000259234	0.2	0.86	0.23	0.58	0.34	EMPTY	FALSE	FALSE	FALSE	FALSE	FALSE	FALSE
NONCO15509	chr13:48385138-48417844	3.3	ENSMUSG00000021379	121103	ENSMUSG00000050954	69804	0.02	0.51	FALSE	NONCO15509	chr13:48385138-48417844	3.3	ENSMUSG00000021379	121103	ENSMUSG00000050954	69804	0.02	0.51	0.2287	2	3.6	turquoise	27.7	0.7086	EMPTY	0.08	0.14	0.55	0.19	0.4	EMPTY	FALSE	FALSE	FALSE	FALSE	FALSE	TRUE
NONCO15524	chr13:50445611-50460948	0.3	ENSMUSG00000037816	11832	ENSMUSG00000071909	6360	EMPTY	EMPTY	FALSE	NONCO15524	chr13:50445611-50460948	0.3	ENSMUSG00000037816	11832	ENSMUSG00000071909	6360	EMPTY	EMPTY	0.2979	20	56880.8	turquoise	1.9	NA	ENSG00000242671	EMPTY	EMPTY	EMPTY	EMPTY	EMPTY	EMPTY	FALSE	FALSE	FALSE	FALSE	FALSE	FALSE
NONCO15536	chr13:52405381-52411104	0.3	ENSMUSG00000021453	556914	ENSMUSG00000047842	93272	-0.18	-0.08	FALSE	NONCO15536	chr13:52405381-52411104	0.3	ENSMUSG00000021453	556914	ENSMUSG00000047842	93272	-0.18	-0.08	0.0548	18	61907.2	darkgreen	2.1	0.1341	EMPTY	0.01	0.04	0.18	0.18	0.04	EMPTY	FALSE	FALSE	FALSE	FALSE	FALSE	FALSE
NONCO15542	chr13:53393624-53398124	0.8	ENSMUSG00000021468	16260	ENSMUSG00000021469	68761	EMPTY	EMPTY	TRUE	NONCO15542	chr13:53393624-53398124	0.8	ENSMUSG00000021468	16260	ENSMUSG00000021469	68761	EMPTY	EMPTY	0.0795	19	117468	lightsteelblue1	4.6	0.0168	EMPTY	0	0	3.87	0.01	0.51	EMPTY	FALSE	TRUE	FALSE	TRUE	FALSE	FALSE
NONCO15544	chr13:53862390-53872880	4.1	ENSMUSG00000063166	336332	ENSMUSG00000021478	178307	-0.26	-0.25	FALSE	NONCO15544	chr13:53862390-53872880	4.1	ENSMUSG00000063166	336332	ENSMUSG00000021478	178307	-0.26	-0.25	0.193	1	11.4	brown	36.3	0.5721	ENSG00000242104	0.02	0.06	0.37	0.12	0.17	EMPTY	FALSE	FALSE	FALSE	FALSE	FALSE	FALSE
NONCO15560	chr13:54887346-54927312	1.6	ENSMUSG00000025875	90571	ENSMUSG00000025876	22100	0.02	-0.46	FALSE	NONCO15560	chr13:54887346-54927312	1.6	ENSMUSG00000025875	90571	ENSMUSG00000025876	22100	0.02	-0.46	0.7225	1	5.2	yellowgreen	8.9	0.6987	EMPTY	0.12	0.05	2.67	0.03	3.9	4930526F13Rik,5330429C05Rik,Gm29431	TRUE	FALSE	TRUE	TRUE	FALSE	FALSE
NONCO15565	chr13:55184280-55190408	1.2	ENSMUSG00000005320	15522	ENSMUSG00000021488	19375	0.04	0.02	FALSE	NONCO15565	chr13:55184280-55190408	1.2	ENSMUSG00000005320	15522	ENSMUSG00000021488	19375	0.04	0.02	0.7225	22	6.5	orange	15.9	0.6469	EMPTY	0.05	0.01	9.52	0.05	1	EMPTY	FALSE	FALSE	FALSE	TRUE	FALSE	FALSE
NONCO15595	chr13:59149156-59186031	0.6	ENSMUSG00000055254	15187	ENSMUSG00000021557	263507	0.51	0.09	FALSE	NONCO15595	chr13:59149156-59186031	0.6	ENSMUSG00000055254	15187	ENSMUSG00000021557	263507	0.51	0.09	0.254	22	45882.4	turquoise	2.3	0.3356	EMPTY	0.23	0.02	14.64	0.02	11.53	EMPTY	FALSE	TRUE	FALSE	TRUE	FALSE	FALSE
NONCO15596	chr13:59251485-59255678	0.9	ENSMUSG00000055254	117516	ENSMUSG00000021557	193860	-0.43	-0.14	FALSE	NONCO15596	chr13:59251485-59255678	0.9	ENSMUSG00000055254	117516	ENSMUSG00000021557	193860	-0.43	-0.14	1	9	33.8	brown	4.2	0.6424	EMPTY	0.02	0.01	2.01	0.06	0.3	EMPTY	FALSE	FALSE	FALSE	FALSE	FALSE	FALSE
NONCO15608	chr13:61687128-61690532	27.9	ENSMUSG00000074870	117002	ENSMUSG00000074867	439385	EMPTY	EMPTY	FALSE	NONCO15608	chr13:61687128-61690532	27.9	ENSMUSG00000074870	117002	ENSMUSG00000074867	439385	EMPTY	EMPTY	0.7666	12	1.7	midnightblue	100	0.102	EMPTY	0.93	1	0.94	0.28	3.29	EMPTY	FALSE	FALSE	FALSE	FALSE	TRUE	FALSE
NONCO15610	chr13:61724667-61724957	24.1	ENSMUSG00000074870	154541	ENSMUSG00000074867	404960	EMPTY	EMPTY	FALSE	NONCO15610	chr13:61724667-61724957	24.1	ENSMUSG00000074870	154541	ENSMUSG00000074867	404960	EMPTY	EMPTY	0.0661	6	14.8	midnightblue	14.8	0	EMPTY	0.33	1	0.33	0.19	1.7	EMPTY	FALSE	FALSE	FALSE	FALSE	FALSE	FALSE
NONCO15613	chr13:62199598-62200494	49.4	ENSMUSG00000074867	26180	ENSMUSG00000094942	167835	-0.1	-0.02	FALSE	NONCO15613	chr13:62199598-62200494	49.4	ENSMUSG00000074867	26180	ENSMUSG00000094942	167835	-0.1	-0.02	0.114	5	2	midnightblue	381.8	0	EMPTY	0.79	0.14	5.59	0.19	4.09	EMPTY	FALSE	FALSE	FALSE	FALSE	TRUE	FALSE
NONCO15614	chr13:62387220-62388135	4.5	ENSMUSG00000094942	4055	ENSMUSG00000055228	66189	-0.48	-0.4	TRUE	NONCO15614	chr13:62387220-62388135	4.5	ENSMUSG00000094942	4055	ENSMUSG00000055228	66189	-0.48	-0.4	0.0455	8	3.5	midnightblue	18.2	0.0097	EMPTY	0.87	0.14	6.14	0.19	4.49	EMPTY	FALSE	FALSE	FALSE	FALSE	TRUE	FALSE
NONCO15615	chr13:62486714-62487989	5.8	ENSMUSG00000055228	20006	ENSMUSG00000074865	29512	0.04	0.58	FALSE	NONCO15615	chr13:62486714-62487989	5.8	ENSMUSG00000055228	20006	ENSMUSG00000074865	29512	0.04	0.58	0.8745	21	2.4	brown	119.8	0.6053	EMPTY	0.64	0.14	4.49	0.19	3.28	EMPTY	FALSE	FALSE	FALSE	FALSE	FALSE	FALSE
NONCO15617	chr13:62527819-62529186	15	ENSMUSG00000074865	7276	ENSMUSG00000072066	76005	0.71	0.28	FALSE	NONCO15617	chr13:62527819-62529186	15	ENSMUSG00000074865	7276	ENSMUSG00000072066	76005	0.71	0.28	0.3159	0	4.3	blue	19.1	0.1475	ENSG00000250608	0.56	0.14	3.95	0.19	2.89	Gm7664	FALSE	FALSE	FALSE	FALSE	TRUE	FALSE
NONCO15619	chr13:62715217-62721553	0.2	ENSMUSG00000072066	107719	ENSMUSG00000091183	52056	EMPTY	EMPTY	FALSE	NONCO15619	chr13:62715217-62721553	0.2	ENSMUSG00000072066	107719	ENSMUSG00000091183	52056	EMPTY	EMPTY	1	0	6.5	darkorange	1.7	NA	EMPTY	EMPTY	EMPTY	EMPTY	EMPTY	EMPTY	EMPTY	FALSE	FALSE	FALSE	FALSE	FALSE	FALSE
NONCO15620	chr13:62813062-62814953	4.4	ENSMUSG00000091183	35974	ENSMUSG00000021456	21932	EMPTY	EMPTY	FALSE	NONCO15620	chr13:62813062-62814953	4.4	ENSMUSG00000091183	35974	ENSMUSG00000021456	21932	EMPTY	EMPTY	0.8745	5	3.1	midnightblue	16.3	0.1885	EMPTY	0.66	0.47	1.39	0.19	3.4	EMPTY	FALSE	FALSE	FALSE	TRUE	FALSE	FALSE
NONCO15622	chr13:62967892-62968699	0.3	ENSMUSG00000069805	79611	ENSMUSG00000021458	46236	-0.32	-0.42	FALSE	NONCO15622	chr13:62967892-62968699	0.3	ENSMUSG00000069805	79611	ENSMUSG00000021458	46236	-0.32	-0.42	1	11	4.9	brown	4.2	0.8096	EMPTY	0.96	0.4	2.38	0.07	13.21	EMPTY	FALSE	FALSE	FALSE	TRUE	TRUE	FALSE
NONCO15639	chr13:64928660-64929228	2.3	ENSMUSG00000056223	5477	ENSMUSG00000074849	103831	EMPTY	EMPTY	TRUE	NONCO15639	chr13:64928660-64929228	2.3	ENSMUSG00000056223	5477	ENSMUSG00000074849	103831	EMPTY	EMPTY	0.0069	14	9.2	darkgreen	10	0.001	EMPTY	0.9	0.14	6.33	0.19	4.64	EMPTY	FALSE	FALSE	FALSE	TRUE	TRUE	FALSE
NONCO1564	chr1:164463607-164464485	4	ENSMUSG00000026576	5253	ENSMUSG00000026574	332160	0.04	-0.27	FALSE	NONCO1564	chr1:164463607-164464485	4	ENSMUSG00000026576	5253	ENSMUSG00000026574	332160	0.04	-0.27	1	9	1.5	salmon4	45	0.992	EMPTY	0	0.02	0.14	0.01	0.17	RP24-272N10.3	FALSE	FALSE	FALSE	TRUE	FALSE	FALSE
NONCO15641	chr13:65240921-65253403	3.1	ENSMUSG00000032999	35206	ENSMUSG00000074847	6137	EMPTY	EMPTY	FALSE	NONCO15641	chr13:65240921-65253403	3.1	ENSMUSG00000032999	35206	ENSMUSG00000074847	6137	EMPTY	EMPTY	1	11	8	brown	34.6	0.1356	EMPTY	0.96	0.01	66.75	0.64	1.5	EMPTY	FALSE	FALSE	FALSE	TRUE	FALSE	FALSE
NONCO15643	chr13:65443951-65449568	1.2	ENSMUSG00000021514	139731	ENSMUSG00000063905	63111	EMPTY	EMPTY	FALSE	NONCO15643	chr13:65443951-65449568	1.2	ENSMUSG00000021514	139731	ENSMUSG00000063905	63111	EMPTY	EMPTY	0.2979	20	14.9	blue	10.3	0.401	EMPTY	EMPTY	EMPTY	EMPTY	EMPTY	EMPTY	EMPTY	FALSE	FALSE	FALSE	FALSE	FALSE	FALSE
NONCO15652	chr13:67278461-67282819	1.3	ENSMUSG00000055480	9394	ENSMUSG00000055341	9632	0.18	0.27	TRUE	NONCO15652	chr13:67278461-67282819	1.3	ENSMUSG00000055480	9394	ENSMUSG00000055341	9632	0.18	0.27	0.0102	20	112.4	lightsteelblue1	49.2	0	EMPTY	0.5	0.14	3.5	0.19	2.57	EMPTY	FALSE	FALSE	FALSE	TRUE	FALSE	FALSE
NONCO15665	chr13:67884958-67893366	0.4	ENSMUSG00000064063	21036	ENSMUSG00000034617	667415	0.01	-0.16	FALSE	NONCO15665	chr13:67884958-67893366	0.4	ENSMUSG00000064063	21036	ENSMUSG00000034617	667415	0.01	-0.16	1	17	18514.4	brown	0.7	NA	ENSG00000271973	EMPTY	EMPTY	EMPTY	EMPTY	EMPTY	EMPTY	FALSE	FALSE	FALSE	FALSE	FALSE	FALSE
NONCO15666	chr13:68173731-68181126	1	ENSMUSG00000064063	309809	ENSMUSG00000034617	379655	-0.33	-0.02	FALSE	NONCO15666	chr13:68173731-68181126	1	ENSMUSG00000064063	309809	ENSMUSG00000034617	379655	-0.33	-0.02	1	9	57301.2	darkred	2	0.6081	EMPTY	EMPTY	EMPTY	EMPTY	EMPTY	EMPTY	EMPTY	FALSE	FALSE	FALSE	FALSE	FALSE	FALSE
NONCO15668	chr13:68442251-68458716	16.5	ENSMUSG00000064063	578329	ENSMUSG00000034617	102065	-0.33	0.59	TRUE	NONCO15668	chr13:68442251-68458716	16.5	ENSMUSG00000064063	578329	ENSMUSG00000034617	102065	-0.33	0.59	0.031	21	5	turquoise	353.3	0.0001	EMPTY	EMPTY	EMPTY	EMPTY	EMPTY	EMPTY	EMPTY	FALSE	FALSE	FALSE	FALSE	FALSE	FALSE
NONCO1567	chr1:165276343-165282524	5.1	ENSMUSG00000040843	39348	ENSMUSG00000040836	13266	0.19	-0.16	FALSE	NONCO1567	chr1:165276343-165282524	5.1	ENSMUSG00000040843	39348	ENSMUSG00000040836	13266	0.19	-0.16	0.6669	20	6.4	turquoise	8.4	0.7274	ENSG00000236445	0.02	0.09	0.22	0.14	0.14	EMPTY	FALSE	FALSE	FALSE	FALSE	FALSE	FALSE
NONCO15678	chr13:69688083-69695378	1.7	ENSMUSG00000021595	52304	ENSMUSG00000052981	7458	-0.05	0.11	FALSE	NONCO15678	chr13:69688083-69695378	1.7	ENSMUSG00000021595	52304	ENSMUSG00000052981	7458	-0.05	0.11	0.6669	4	14.9	midnightblue	15	0.1827	EMPTY	0.08	0.14	0.55	0.03	2.58	EMPTY	FALSE	FALSE	FALSE	TRUE	FALSE	TRUE
NONCO15685	chr13:71104647-71105206	0.5	ENSMUSG00000021600	220145	ENSMUSG00000060969	852716	EMPTY	EMPTY	FALSE	NONCO15685	chr13:71104647-71105206	0.5	ENSMUSG00000021600	220145	ENSMUSG00000060969	852716	EMPTY	EMPTY	1	9	9.5	lightyellow	2.1	0.9418	EMPTY	0.17	0.03	5.36	0.06	2.85	EMPTY	FALSE	FALSE	FALSE	TRUE	FALSE	FALSE
NONCO15686	chr13:71148346-71165126	0.8	ENSMUSG00000021600	263844	ENSMUSG00000060969	792796	EMPTY	EMPTY	FALSE	NONCO15686	chr13:71148346-71165126	0.8	ENSMUSG00000021600	263844	ENSMUSG00000060969	792796	EMPTY	EMPTY	1	17	47743.8	ivory	2.4	0.7082	EMPTY	0	0	10.63	0.26	0.01	EMPTY	FALSE	FALSE	FALSE	FALSE	FALSE	FALSE
NONCO15688	chr13:72471988-72472584	1.3	ENSMUSG00000060969	508266	ENSMUSG00000001504	156237	0.54	0.38	FALSE	NONCO15688	chr13:72471988-72472584	1.3	ENSMUSG00000060969	508266	ENSMUSG00000001504	156237	0.54	0.38	0.5782	10	4.4	brown	2.7	0.8603	EMPTY	0.8	0.14	5.65	0.09	8.63	EMPTY	FALSE	FALSE	FALSE	FALSE	TRUE	FALSE
NONCO157	chr1:43887985-43889737	21.7	ENSMUSG00000057363	60186	ENSMUSG00000041763	43911	-0.07	-0.27	FALSE	NONCO157	chr1:43887985-43889737	21.7	ENSMUSG00000057363	60186	ENSMUSG00000041763	43911	-0.07	-0.27	0.0259	20	2	paleturquoise	63.3	0.0727	EMPTY	0.99	0.03	31.66	0.14	7.09	Gm19587	FALSE	FALSE	FALSE	TRUE	TRUE	FALSE
NONCO15700	chr13:74440277-74441007	3.9	ENSMUSG00000062382	32961	ENSMUSG00000069208	39511	EMPTY	EMPTY	TRUE	NONCO15700	chr13:74440277-74441007	3.9	ENSMUSG00000062382	32961	ENSMUSG00000069208	39511	EMPTY	EMPTY	0.0038	8	9.4	midnightblue	37.7	0	EMPTY	0.45	0.14	3.2	0.19	2.34	EMPTY	FALSE	FALSE	FALSE	TRUE	TRUE	FALSE
NONCO15712	chr13:77668910-77670523	12.3	ENSMUSG00000071252	55620	ENSMUSG00000064138	38168	-0.25	-0.6	FALSE	NONCO15712	chr13:77668910-77670523	12.3	ENSMUSG00000071252	55620	ENSMUSG00000064138	38168	-0.25	-0.6	0.1367	13	4.5	darkgreen	58.1	0	EMPTY	0.79	0.14	5.58	0.19	4.09	EMPTY	FALSE	FALSE	FALSE	TRUE	TRUE	FALSE
NONCO15716	chr13:78171520-78179035	0.4	ENSMUSG00000064138	5283	ENSMUSG00000069171	9939	-0.37	-0.05	FALSE	NONCO15716	chr13:78171520-78179035	0.4	ENSMUSG00000064138	5283	ENSMUSG00000069171	9939	-0.37	-0.05	1	15	23077.7	yellowgreen	1.1	NA	EMPTY	0.01	0.14	0.1	0.73	0.02	EMPTY	FALSE	FALSE	FALSE	TRUE	FALSE	FALSE
NONCO15718	chr13:78427095-78442894	2.3	ENSMUSG00000069171	227339	ENSMUSG00000074794	2440491	0.2	-0.22	FALSE	NONCO15718	chr13:78427095-78442894	2.3	ENSMUSG00000069171	227339	ENSMUSG00000074794	2440491	0.2	-0.22	1	5	5.8	brown4	15.8	0.6357	EMPTY	0.4	0.14	2.79	0.6	0.66	EMPTY	FALSE	TRUE	FALSE	TRUE	FALSE	FALSE
NONCO15721	chr13:80489420-80492229	0.1	ENSMUSG00000069171	2289664	ENSMUSG00000074794	391156	-0.6	0.29	FALSE	NONCO15721	chr13:80489420-80492229	0.1	ENSMUSG00000069171	2289664	ENSMUSG00000074794	391156	-0.6	0.29	0.3159	20	17877.2	turquoise	0.8	NA	EMPTY	EMPTY	EMPTY	EMPTY	EMPTY	EMPTY	EMPTY	FALSE	FALSE	FALSE	FALSE	FALSE	FALSE
NONCO15724	chr13:81032286-81033667	0.5	ENSMUSG00000074794	136252	ENSMUSG00000069170	61402	-0.17	0.13	FALSE	NONCO15724	chr13:81032286-81033667	0.5	ENSMUSG00000074794	136252	ENSMUSG00000069170	61402	-0.17	0.13	0.6291	22	158768	lightyellow	6.2	0.1552	ENSG00000227549	0.03	0.09	0.36	0.05	0.63	EMPTY	FALSE	FALSE	FALSE	FALSE	FALSE	FALSE
NONCO15731	chr13:83682723-83687620	81.8	ENSMUSG00000005583	15645	ENSMUSG00000035762	534695	-0.67	-0.57	TRUE	NONCO15731	chr13:83682723-83687620	81.8	ENSMUSG00000005583	15645	ENSMUSG00000035762	534695	-0.67	-0.57	0.0259	9	45.7	midnightblue	11.9	0	EMPTY	0.38	0.14	2.69	0.19	1.97	EMPTY	FALSE	FALSE	FALSE	TRUE	TRUE	FALSE
NONCO15732	chr13:83721107-83741874	7.5	ENSMUSG00000005583	54029	ENSMUSG00000035762	480441	0.77	0.33	TRUE	NONCO15732	chr13:83721107-83741874	7.5	ENSMUSG00000005583	54029	ENSMUSG00000035762	480441	0.77	0.33	0.8745	22	2.3	lightsteelblue1	73	0.0124	EMPTY	0.7	0	193.03	0.03	23.64	C130071C03Rik	FALSE	TRUE	FALSE	TRUE	FALSE	FALSE
NONCO15733	chr13:83761179-83951878	0.9	ENSMUSG00000005583	94101	ENSMUSG00000035762	270437	0.67	0.47	FALSE	NONCO15733	chr13:83761179-83951878	0.9	ENSMUSG00000005583	94101	ENSMUSG00000035762	270437	0.67	0.47	0.9921	21	5.7	turquoise	7.4	0.329	EMPTY	0.08	0	21.78	0.03	3.1	2810049E08Rik,C130071C03Rik	FALSE	TRUE	FALSE	FALSE	TRUE	TRUE
NONCO15737	chr13:84666836-84700150	0.8	ENSMUSG00000035762	370967	ENSMUSG00000096449	426850	EMPTY	EMPTY	FALSE	NONCO15737	chr13:84666836-84700150	0.8	ENSMUSG00000035762	370967	ENSMUSG00000096449	426850	EMPTY	EMPTY	1	16	81433.8	white	2.8	0.1797	EMPTY	0.01	0.14	0.1	0.06	0.24	EMPTY	FALSE	TRUE	FALSE	FALSE	FALSE	FALSE
NONCO15742	chr13:90216458-90222492	0.4	ENSMUSG00000012422	72552	ENSMUSG00000094277	360909	EMPTY	EMPTY	FALSE	NONCO15742	chr13:90216458-90222492	0.4	ENSMUSG00000012422	72552	ENSMUSG00000094277	360909	EMPTY	EMPTY	1	13	120105	darkred	2.9	0.0324	EMPTY	EMPTY	EMPTY	EMPTY	EMPTY	EMPTY	EMPTY	FALSE	FALSE	FALSE	FALSE	FALSE	FALSE
NONCO15744	chr13:91261022-91262751	12.6	ENSMUSG00000021619	37036	ENSMUSG00000003992	197533	-0.23	-0.12	FALSE	NONCO15744	chr13:91261022-91262751	12.6	ENSMUSG00000021619	37036	ENSMUSG00000003992	197533	-0.23	-0.12	1	13	2.6	brown	9.2	0.7315	EMPTY	0.98	0.37	2.65	0.35	2.81	EMPTY	FALSE	FALSE	TRUE	TRUE	TRUE	FALSE
NONCO15758	chr13:93411636-93413106	3.4	ENSMUSG00000007617	7508	ENSMUSG00000021690	16992	-0.05	0.72	FALSE	NONCO15758	chr13:93411636-93413106	3.4	ENSMUSG00000007617	7508	ENSMUSG00000021690	16992	-0.05	0.72	0.114	5	8.9	brown	33	0.0045	ENSG00000272452	0.22	0.23	0.94	0.08	2.72	EMPTY	FALSE	FALSE	FALSE	FALSE	FALSE	FALSE
NONCO15768	chr13:94306711-94310487	0.9	ENSMUSG00000021687	20855	ENSMUSG00000042857	45353	0.15	0.11	FALSE	NONCO15768	chr13:94306711-94310487	0.9	ENSMUSG00000021687	20855	ENSMUSG00000042857	45353	0.15	0.11	1	17	60170.9	darkgreen	3.1	0.7054	EMPTY	0.03	0.04	0.75	0.19	0.15	EMPTY	FALSE	FALSE	FALSE	TRUE	FALSE	FALSE
NONCO15781	chr13:96351557-96367274	0.6	ENSMUSG00000051111	218981	ENSMUSG00000021671	21021	-0.04	0.03	FALSE	NONCO15781	chr13:96351557-96367274	0.6	ENSMUSG00000051111	218981	ENSMUSG00000021671	21021	-0.04	0.03	1	13	69075.6	turquoise	3.9	0.5667	EMPTY	0.03	0.14	0.18	0.01	3.69	EMPTY	FALSE	FALSE	FALSE	FALSE	FALSE	FALSE
NONCO15782	chr13:96376926-96377632	15	ENSMUSG00000051111	244350	ENSMUSG00000021671	10663	-0.43	-0.34	FALSE	NONCO15782	chr13:96376926-96377632	15	ENSMUSG00000051111	244350	ENSMUSG00000021671	10663	-0.43	-0.34	0.4325	10	3.6	midnightblue	72.2	0.001	EMPTY	1	0.14	7.02	0.02	41.09	EMPTY	FALSE	FALSE	FALSE	TRUE	TRUE	FALSE
NONCO15790	chr13:97434910-97497007	0.5	ENSMUSG00000041773	181872	ENSMUSG00000069117	263124	-0.07	0.19	FALSE	NONCO15790	chr13:97434910-97497007	0.5	ENSMUSG00000041773	181872	ENSMUSG00000069117	263124	-0.07	0.19	0.053	20	368564	blue	10.2	0.001	EMPTY	0.14	0.01	20.76	0.02	6.53	Lincenc1	TRUE	FALSE	FALSE	TRUE	FALSE	FALSE
NONCO15791	chr13:97511951-97513242	0.4	ENSMUSG00000041773	258913	ENSMUSG00000069117	246889	0.13	-0.01	FALSE	NONCO15791	chr13:97511951-97513242	0.4	ENSMUSG00000041773	258913	ENSMUSG00000069117	246889	0.13	-0.01	1	11	4.6	greenyellow	5.6	0.9747	EMPTY	0.01	0.01	1.48	0.27	0.04	EMPTY	FALSE	FALSE	FALSE	FALSE	FALSE	FALSE
NONCO15792	chr13:97559962-97583991	2.8	ENSMUSG00000041773	306924	ENSMUSG00000069117	176140	0.65	-0.51	FALSE	NONCO15792	chr13:97559962-97583991	2.8	ENSMUSG00000041773	306924	ENSMUSG00000069117	176140	0.65	-0.51	0.2979	20	42.4	turquoise	26.5	0.2284	EMPTY	0.05	0.01	3.55	0.01	6.79	EMPTY	FALSE	FALSE	FALSE	TRUE	FALSE	FALSE
NONCO15799	chr13:98425205-98428080	0.8	ENSMUSG00000078302	68503	ENSMUSG00000092116	61269	0.02	-0.29	FALSE	NONCO15799	chr13:98425205-98428080	0.8	ENSMUSG00000078302	68503	ENSMUSG00000092116	61269	0.02	-0.29	0.8278	22	16.5	turquoise	3.9	0.8029	EMPTY	0.39	0	145.13	0.26	1.51	EMPTY	FALSE	FALSE	FALSE	FALSE	FALSE	FALSE
NONCO15801	chr13:98530167-98531684	0.4	ENSMUSG00000092116	38167	ENSMUSG00000046082	103295	EMPTY	EMPTY	FALSE	NONCO15801	chr13:98530167-98531684	0.4	ENSMUSG00000092116	38167	ENSMUSG00000046082	103295	EMPTY	EMPTY	1	17	63467.8	brown4	2.5	0.0979	EMPTY	0.02	0.02	0.92	0.2	0.08	EMPTY	FALSE	FALSE	FALSE	FALSE	FALSE	FALSE
NONCO15802	chr13:98575694-98614416	10.6	ENSMUSG00000092116	83694	ENSMUSG00000046082	20563	EMPTY	EMPTY	FALSE	NONCO15802	chr13:98575694-98614416	10.6	ENSMUSG00000092116	83694	ENSMUSG00000046082	20563	EMPTY	EMPTY	0.0661	10	4	lightcyan	61.1	0	EMPTY	0.79	0.37	2.15	0.02	46.22	EMPTY	FALSE	FALSE	FALSE	TRUE	TRUE	FALSE
NONCO15815	chr13:99609702-99617777	0.8	ENSMUSG00000052727	93101	ENSMUSG00000021647	280708	EMPTY	EMPTY	FALSE	NONCO15815	chr13:99609702-99617777	0.8	ENSMUSG00000052727	93101	ENSMUSG00000021647	280708	EMPTY	EMPTY	0.4073	2	306316	darkred	10.5	0.0468	EMPTY	0.31	0.05	6.43	0.07	4.14	EMPTY	FALSE	FALSE	FALSE	FALSE	FALSE	FALSE
NONCO15821	chr13:100871530-100975066	0.9	ENSMUSG00000021629	38104	ENSMUSG00000041417	705498	0.17	-0.22	FALSE	NONCO15821	chr13:100871530-100975066	0.9	ENSMUSG00000021629	38104	ENSMUSG00000041417	705498	0.17	-0.22	1	9	5.9	greenyellow	4.3	0.8507	ENSG00000254987	0.08	0.69	0.11	0.13	0.58	Gm29502	FALSE	FALSE	FALSE	TRUE	FALSE	FALSE
NONCO15823	chr13:101625203-101631054	0.4	ENSMUSG00000021629	791777	ENSMUSG00000041417	49510	0.27	-0.27	FALSE	NONCO15823	chr13:101625203-101631054	0.4	ENSMUSG00000021629	791777	ENSMUSG00000041417	49510	0.27	-0.27	1	13	83137	yellowgreen	2.3	0.1754	EMPTY	0.02	0.04	0.44	0	6.66	EMPTY	FALSE	FALSE	FALSE	FALSE	FALSE	FALSE
NONCO15836	chr13:103774679-103776664	2.7	ENSMUSG00000032621	10176	ENSMUSG00000021709	42124	0.29	0.25	FALSE	NONCO15836	chr13:103774679-103776664	2.7	ENSMUSG00000032621	10176	ENSMUSG00000021709	42124	0.29	0.25	0.6669	10	4.8	blue	16.6	0.2456	EMPTY	EMPTY	EMPTY	EMPTY	EMPTY	EMPTY	EMPTY	FALSE	FALSE	FALSE	FALSE	FALSE	FALSE
NONCO15852	chr13:107469822-107488612	1.5	ENSMUSG00000049233	55056	ENSMUSG00000032846	236007	0.08	-0.01	FALSE	NONCO15852	chr13:107469822-107488612	1.5	ENSMUSG00000049233	55056	ENSMUSG00000032846	236007	0.08	-0.01	0.114	0	24.7	turquoise	4.1	0.2778	EMPTY	0	0.06	0.08	0.11	0.04	EMPTY	FALSE	FALSE	FALSE	TRUE	FALSE	FALSE
NONCO15868	chr13:110627245-110642754	1.7	ENSMUSG00000021701	226402	ENSMUSG00000055194	612260	EMPTY	EMPTY	FALSE	NONCO15868	chr13:110627245-110642754	1.7	ENSMUSG00000021701	226402	ENSMUSG00000055194	612260	EMPTY	EMPTY	0.9417	0	5.8	greenyellow	16.8	0.932	EMPTY	0.01	0.29	0.03	0.03	0.26	EMPTY	FALSE	TRUE	FALSE	FALSE	FALSE	FALSE
NONCO15881	chr13:112100721-112101695	3.5	ENSMUSG00000021754	291729	ENSMUSG00000049985	186757	0.56	0.05	FALSE	NONCO15881	chr13:112100721-112101695	3.5	ENSMUSG00000021754	291729	ENSMUSG00000049985	186757	0.56	0.05	1	11	4.3	blue	14.1	0.7047	EMPTY	0.03	0.01	2.4	0.07	0.52	EMPTY	FALSE	FALSE	FALSE	TRUE	FALSE	FALSE
NONCO15886	chr13:113269986-113274220	16.2	ENSMUSG00000042385	44079	ENSMUSG00000021763	42865	0.15	0.21	TRUE	NONCO15886	chr13:113269986-113274220	16.2	ENSMUSG00000042385	44079	ENSMUSG00000021763	42865	0.15	0.21	0.0455	2	4.4	salmon4	78.1	0.0022	ENSG00000266950	EMPTY	EMPTY	EMPTY	EMPTY	EMPTY	EMPTY	FALSE	FALSE	FALSE	FALSE	FALSE	FALSE
NONCO15889	chr13:113735621-113749490	0.3	ENSMUSG00000051456	71946	ENSMUSG00000042348	45016	0.18	-0.13	FALSE	NONCO15889	chr13:113735621-113749490	0.3	ENSMUSG00000051456	71946	ENSMUSG00000042348	45016	0.18	-0.13	1	5	19.3	turquoise	2.4	0.7053	EMPTY	0.6	0.02	24.96	0.15	3.99	EMPTY	FALSE	FALSE	FALSE	TRUE	TRUE	FALSE
NONCO15890	chr13:113760717-113761739	0.9	ENSMUSG00000051456	97042	ENSMUSG00000042348	32767	-0.15	0.03	FALSE	NONCO15890	chr13:113760717-113761739	0.9	ENSMUSG00000051456	97042	ENSMUSG00000042348	32767	-0.15	0.03	0.1367	6	7.3	midnightblue	12.9	0	ENSG00000267289	0.99	0.21	4.81	0.25	4.01	EMPTY	FALSE	FALSE	FALSE	FALSE	FALSE	FALSE
NONCO15899	chr13:117334376-117345286	3.5	ENSMUSG00000021728	60279	ENSMUSG00000021730	257195	-0.48	0.4	FALSE	NONCO15899	chr13:117334376-117345286	3.5	ENSMUSG00000021728	60279	ENSMUSG00000021730	257195	-0.48	0.4	0.9417	0	25.3	brown	17.4	0.4383	EMPTY	0.04	0.37	0.11	0.06	0.66	EMPTY	FALSE	FALSE	FALSE	FALSE	FALSE	FALSE
NONCO15908	chr13:3138931-3140158	1	End of chr13	3138931	ENSMUSG00000096107	220872	EMPTY	EMPTY	FALSE	NONCO15908	chr13:3138931-3140158	1	End of chr13	3138931	ENSMUSG00000096107	220872	EMPTY	EMPTY	0.1367	16	31	darkgreen	12.8	0.0135	EMPTY	0.83	0.06	12.99	0.19	4.29	EMPTY	FALSE	FALSE	FALSE	TRUE	TRUE	FALSE
NONCO15909	chr13:3202529-3216495	1.4	End of chr13	3202529	ENSMUSG00000096107	144535	EMPTY	EMPTY	FALSE	NONCO15909	chr13:3202529-3216495	1.4	End of chr13	3202529	ENSMUSG00000096107	144535	EMPTY	EMPTY	1	18	372662	brown	7.7	NA	EMPTY	0.06	0.31	0.2	0.23	0.26	EMPTY	FALSE	FALSE	FALSE	FALSE	FALSE	FALSE
NONCO15910	chr13:3353058-3353935	1.9	End of chr13	3353058	ENSMUSG00000096107	7095	EMPTY	EMPTY	FALSE	NONCO15910	chr13:3353058-3353935	1.9	End of chr13	3353058	ENSMUSG00000096107	7095	EMPTY	EMPTY	0.114	9	3.9	midnightblue	22.1	0.1425	EMPTY	0.95	0.14	6.66	0.27	3.52	EMPTY	FALSE	FALSE	FALSE	FALSE	FALSE	FALSE
NONCO15917	chr13:5275233-5278274	0.1	ENSMUSG00000053499	438749	ENSMUSG00000000078	583216	EMPTY	EMPTY	FALSE	NONCO15917	chr13:5275233-5278274	0.1	ENSMUSG00000053499	438749	ENSMUSG00000000078	583216	EMPTY	EMPTY	0.4726	22	14988.9	turquoise	0.6	NA	EMPTY	0	0.22	0.01	0.19	0.01	EMPTY	FALSE	FALSE	FALSE	FALSE	FALSE	TRUE
NONCO1592	chr1:169471030-169485445	9.3	ENSMUSG00000052534	1038761	ENSMUSG00000026683	12490	0.43	0.08	FALSE	NONCO1592	chr1:169471030-169485445	9.3	ENSMUSG00000052534	1038761	ENSMUSG00000026683	12490	0.43	0.08	0.193	1	3.8	brown	194.5	0	EMPTY	0.04	0.02	2.56	0.98	0.04	EMPTY	FALSE	FALSE	FALSE	TRUE	FALSE	FALSE
NONCO15921	chr13:7137987-7160301	0.4	ENSMUSG00000021196	489211	ENSMUSG00000091053	869528	0.42	0.46	FALSE	NONCO15921	chr13:7137987-7160301	0.4	ENSMUSG00000021196	489211	ENSMUSG00000091053	869528	0.42	0.46	0.3708	0	47.1	darkred	7.2	0.3824	EMPTY	0	0.14	0	0.01	0.04	EMPTY	FALSE	FALSE	FALSE	FALSE	FALSE	FALSE
NONCO15923	chr13:8128893-8129673	2.2	ENSMUSG00000091053	90788	ENSMUSG00000052551	73194	0.24	0.66	TRUE	NONCO15923	chr13:8128893-8129673	2.2	ENSMUSG00000091053	90788	ENSMUSG00000052551	73194	0.24	0.66	0.0214	21	24.4	turquoise	16.8	0	EMPTY	0.99	0	283.51	0.06	16.43	EMPTY	FALSE	FALSE	FALSE	FALSE	FALSE	FALSE
NONCO15925	chr13:8784932-8787853	0.4	ENSMUSG00000052551	16186	ENSMUSG00000021147	15116	-0.05	-0.33	FALSE	NONCO15925	chr13:8784932-8787853	0.4	ENSMUSG00000052551	16186	ENSMUSG00000021147	15116	-0.05	-0.33	0.5461	18	578815	brown	10.5	NA	EMPTY	0.05	0.14	0.37	0.19	0.27	EMPTY	FALSE	FALSE	FALSE	FALSE	FALSE	FALSE
NONCO15940	chr13:12534952-12540446	0.3	ENSMUSG00000095105	14503	ENSMUSG00000057069	25438	0.54	0.22	FALSE	NONCO15940	chr13:12534952-12540446	0.3	ENSMUSG00000095105	14503	ENSMUSG00000057069	25438	0.54	0.22	0.5013	18	258149	blue	6	0.0621	EMPTY	0.22	0.06	3.48	0.17	1.28	EMPTY	FALSE	FALSE	FALSE	FALSE	FALSE	FALSE
NONCO15942	chr13:12734341-12735337	0.3	ENSMUSG00000078141	31753	ENSMUSG00000056457	55486	EMPTY	EMPTY	FALSE	NONCO15942	chr13:12734341-12735337	0.3	ENSMUSG00000078141	31753	ENSMUSG00000056457	55486	EMPTY	EMPTY	0.0759	12	4.2	lightcyan	3.7	0.5377	EMPTY	0.08	0.14	0.59	0.1	0.85	EMPTY	FALSE	FALSE	FALSE	FALSE	FALSE	FALSE
NONCO15943	chr13:12765494-12766152	0.1	ENSMUSG00000078141	62906	ENSMUSG00000056457	24671	EMPTY	EMPTY	FALSE	NONCO15943	chr13:12765494-12766152	0.1	ENSMUSG00000078141	62906	ENSMUSG00000056457	24671	EMPTY	EMPTY	0.8278	14	21421.7	paleturquoise	0.9	NA	EMPTY	EMPTY	EMPTY	EMPTY	EMPTY	EMPTY	EMPTY	FALSE	FALSE	FALSE	TRUE	FALSE	FALSE
NONCO15956	chr13:17709126-17710549	0.8	ENSMUSG00000012429	10022	ENSMUSG00000041297	5414	EMPTY	EMPTY	FALSE	NONCO15956	chr13:17709126-17710549	0.8	ENSMUSG00000012429	10022	ENSMUSG00000041297	5414	EMPTY	EMPTY	1	7	9.1	brown	12.3	0.5049	EMPTY	0.37	0.51	0.71	0.08	4.76	EMPTY	FALSE	FALSE	FALSE	FALSE	FALSE	FALSE
NONCO15958	chr13:17811154-17811491	1.9	ENSMUSG00000041297	6058	ENSMUSG00000008859	69085	-0.67	-0.43	FALSE	NONCO15958	chr13:17811154-17811491	1.9	ENSMUSG00000041297	6058	ENSMUSG00000008859	69085	-0.67	-0.43	1	15	9.3	darkgreen	1.8	NA	EMPTY	EMPTY	EMPTY	EMPTY	EMPTY	EMPTY	EMPTY	FALSE	FALSE	FALSE	FALSE	FALSE	FALSE
NONCO15979	chr13:23433299-23438047	0.7	ENSMUSG00000036376	9434	ENSMUSG00000000706	18946	-0.09	-0.24	FALSE	NONCO15979	chr13:23433299-23438047	0.7	ENSMUSG00000036376	9434	ENSMUSG00000000706	18946	-0.09	-0.24	0.5782	16	81307.6	blue	3	0.0865	EMPTY	0.01	0.14	0.1	0.12	0.11	EMPTY	FALSE	FALSE	FALSE	FALSE	FALSE	FALSE
NONCO15980	chr13:23443964-23445935	2	ENSMUSG00000036376	20099	ENSMUSG00000000706	11058	0.25	-0.32	FALSE	NONCO15980	chr13:23443964-23445935	2	ENSMUSG00000036376	20099	ENSMUSG00000000706	11058	0.25	-0.32	1	5	6.9	greenyellow	20.8	0.6026	EMPTY	0.14	0.14	1.01	0.03	5.07	EMPTY	FALSE	FALSE	TRUE	TRUE	FALSE	FALSE
NONCO15995	chr13:28240948-28258178	886.7	ENSMUSG00000017064	89338	ENSMUSG00000076431	690742	EMPTY	EMPTY	FALSE	NONCO15995	chr13:28240948-28258178	886.7	ENSMUSG00000017064	89338	ENSMUSG00000076431	690742	EMPTY	EMPTY	0.0661	6	4.3	midnightblue	1292.2	0	EMPTY	0.88	0.14	6.19	0.19	4.53	Gm11361	FALSE	FALSE	FALSE	TRUE	TRUE	FALSE
NONCO15996	chr13:28396899-28420209	2.3	ENSMUSG00000017064	245289	ENSMUSG00000076431	528711	EMPTY	EMPTY	FALSE	NONCO15996	chr13:28396899-28420209	2.3	ENSMUSG00000017064	245289	ENSMUSG00000076431	528711	EMPTY	EMPTY	1	17	4.1	lightsteelblue1	28.2	0.4471	EMPTY	0.55	0.01	43.02	0.24	2.29	EMPTY	FALSE	FALSE	FALSE	TRUE	FALSE	FALSE
NONCO15997	chr13:28460034-28885752	2.5	ENSMUSG00000017064	308424	ENSMUSG00000076431	63168	EMPTY	EMPTY	FALSE	NONCO15997	chr13:28460034-28885752	2.5	ENSMUSG00000017064	308424	ENSMUSG00000076431	63168	EMPTY	EMPTY	0.6291	2	8.9	brown	14	0.5411	EMPTY	0.04	0.09	0.43	0.03	1.42	2610307P16Rik	TRUE	FALSE	FALSE	TRUE	FALSE	FALSE
NONCO16003	chr13:30533277-30534236	0.3	ENSMUSG00000049115	150411	ENSMUSG00000038462	6073	0.52	-0.5	FALSE	NONCO16003	chr13:30533277-30534236	0.3	ENSMUSG00000049115	150411	ENSMUSG00000038462	6073	0.52	-0.5	0.5782	18	29589.5	orange	1.2	NA	EMPTY	0.29	0.01	21.3	0.19	1.5	EMPTY	FALSE	FALSE	FALSE	FALSE	FALSE	FALSE
NONCO16011	chr13:31336737-31408922	1.3	ENSMUSG00000056257	360762	ENSMUSG00000090863	147213	EMPTY	EMPTY	FALSE	NONCO16011	chr13:31336737-31408922	1.3	ENSMUSG00000056257	360762	ENSMUSG00000090863	147213	EMPTY	EMPTY	1	11	102317	lightyellow	5	0.4531	EMPTY	0.51	0	198.65	0.03	19.52	G630018N14Rik,Gm11375,Gm11376	TRUE	FALSE	FALSE	TRUE	FALSE	FALSE
NONCO16021	chr13:34148443-34150918	4.3	ENSMUSG00000045136	18090	ENSMUSG00000071451	12047	0.01	0.55	FALSE	NONCO16021	chr13:34148443-34150918	4.3	ENSMUSG00000045136	18090	ENSMUSG00000071451	12047	0.01	0.55	1	7	7.6	saddlebrown	27.9	0.0436	EMPTY	0.1	0.01	13.9	0.12	0.81	EMPTY	FALSE	TRUE	TRUE	TRUE	FALSE	FALSE
NONCO16033	chr13:36578682-36579737	9	ENSMUSG00000021420	41091	ENSMUSG00000039114	145889	-0.76	-0.52	TRUE	NONCO16033	chr13:36578682-36579737	9	ENSMUSG00000021420	41091	ENSMUSG00000039114	145889	-0.76	-0.52	0.0259	9	22.7	midnightblue	49	0	EMPTY	0.02	0.07	0.33	0.02	1.17	EMPTY	FALSE	FALSE	FALSE	TRUE	FALSE	FALSE
NONCO16036	chr13:37477182-37478586	1.1	ENSMUSG00000021423	58147	ENSMUSG00000039087	299815	-0.17	-0.34	FALSE	NONCO16036	chr13:37477182-37478586	1.1	ENSMUSG00000021423	58147	ENSMUSG00000039087	299815	-0.17	-0.34	0.8745	20	35282.4	lightyellow	1.8	NA	EMPTY	0.01	0.14	0.04	0.03	0.16	EMPTY	FALSE	FALSE	FALSE	TRUE	FALSE	FALSE
NONCO16044	chr13:38069253-38073241	0.4	ENSMUSG00000021428	7821	ENSMUSG00000054889	78088	-0.19	-0.07	FALSE	NONCO16044	chr13:38069253-38073241	0.4	ENSMUSG00000021428	7821	ENSMUSG00000054889	78088	-0.19	-0.07	0.5013	21	14.1	turquoise	1.8	NA	EMPTY	EMPTY	EMPTY	EMPTY	EMPTY	EMPTY	EMPTY	FALSE	FALSE	FALSE	FALSE	FALSE	FALSE
NONCO16071	chr13:44183468-44263844	0.4	ENSMUSG00000015396	380339	ENSMUSG00000038518	465631	-0.22	-0.53	FALSE	NONCO16071	chr13:44183468-44263844	0.4	ENSMUSG00000015396	380339	ENSMUSG00000038518	465631	-0.22	-0.53	0.1619	20	47521.3	turquoise	1.5	NA	ENSG00000254863	0	0.02	0.1	0.19	0.01	EMPTY	FALSE	FALSE	FALSE	TRUE	FALSE	FALSE
NONCO16076	chr13:45246659-45267787	1.9	ENSMUSG00000047061	165438	ENSMUSG00000038175	121956	0.14	-0.4	FALSE	NONCO16076	chr13:45246659-45267787	1.9	ENSMUSG00000047061	165438	ENSMUSG00000038175	121956	0.14	-0.4	0.129	22	212880	turquoise	8.5	0.0067	EMPTY	0.02	0.02	0.74	0.03	0.54	EMPTY	FALSE	FALSE	FALSE	TRUE	FALSE	FALSE
NONCO16078	chr13:45462387-45466189	0.2	ENSMUSG00000038175	50369	ENSMUSG00000000253	41256	-0.22	-0.34	FALSE	NONCO16078	chr13:45462387-45466189	0.2	ENSMUSG00000038175	50369	ENSMUSG00000000253	41256	-0.22	-0.34	1	13	16.4	darkred	2.1	0.9618	EMPTY	0.43	0	367.53	0.07	6.08	EMPTY	FALSE	FALSE	FALSE	FALSE	FALSE	FALSE
NONCO16086	chr13:46473190-46474863	0.6	ENSMUSG00000038132	42101	ENSMUSG00000021373	26986	-0.47	0.21	FALSE	NONCO16086	chr13:46473190-46474863	0.6	ENSMUSG00000038132	42101	ENSMUSG00000021373	26986	-0.47	0.21	1	0	180590	turquoise	7.5	0.5391	EMPTY	0.01	0	4.26	0.14	0.04	EMPTY	FALSE	FALSE	FALSE	FALSE	FALSE	FALSE
NONCO161	chr1:45519624-45519956	0.3	ENSMUSG00000026042	16343	ENSMUSG00000025995	275211	-0.03	-0.44	TRUE	NONCO161	chr1:45519624-45519956	0.3	ENSMUSG00000026042	16343	ENSMUSG00000025995	275211	-0.03	-0.44	0.0122	8	99153.6	midnightblue	3.5	0.0002	EMPTY	0.99	0.14	6.96	0.19	5.09	EMPTY	FALSE	FALSE	FALSE	FALSE	FALSE	FALSE
NONCO16102	chr13:48108263-48109967	1.6	ENSMUSG00000038068	860273	ENSMUSG00000021379	151461	0.05	-0.29	FALSE	NONCO16102	chr13:48108263-48109967	1.6	ENSMUSG00000038068	860273	ENSMUSG00000021379	151461	0.05	-0.29	1	11	7	orange	4.2	0.8522	EMPTY	0.02	0.01	2.09	0.1	0.17	EMPTY	FALSE	FALSE	FALSE	FALSE	FALSE	FALSE
NONCO16104	chr13:48272414-48273904	38.4	ENSMUSG00000021379	8379	ENSMUSG00000050954	213744	0.72	-0.04	TRUE	NONCO16104	chr13:48272414-48273904	38.4	ENSMUSG00000021379	8379	ENSMUSG00000050954	213744	0.72	-0.04	0.0122	5	3.7	midnightblue	210.5	0.05	EMPTY	0.3	0.09	3.54	0.01	24.89	A330048O09Rik	TRUE	TRUE	TRUE	TRUE	FALSE	FALSE
NONCO16107	chr13:48535523-48537833	4.9	ENSMUSG00000053181	20665	ENSMUSG00000038042	40041	-0.2	0.35	FALSE	NONCO16107	chr13:48535523-48537833	4.9	ENSMUSG00000053181	20665	ENSMUSG00000038042	40041	-0.2	0.35	1	7	2.2	brown4	77.9	0.8325	EMPTY	0.13	0.06	2.23	0.01	16.49	6720427I07Rik	FALSE	FALSE	FALSE	TRUE	FALSE	FALSE
NONCO16114	chr13:50950386-50950725	21.1	ENSMUSG00000094918	246952	ENSMUSG00000021395	150156	EMPTY	EMPTY	FALSE	NONCO16114	chr13:50950386-50950725	21.1	ENSMUSG00000094918	246952	ENSMUSG00000021395	150156	EMPTY	EMPTY	0.0661	6	6.7	midnightblue	19.9	0.0246	EMPTY	1	0.11	8.92	0.16	6.22	EMPTY	FALSE	FALSE	FALSE	FALSE	TRUE	FALSE
NONCO16121	chr13:51635601-51635955	0.3	ENSMUSG00000021448	68518	ENSMUSG00000062248	9278	-0.09	-0.32	FALSE	NONCO16121	chr13:51635601-51635955	0.3	ENSMUSG00000021448	68518	ENSMUSG00000062248	9278	-0.09	-0.32	0.9921	1	13.7	turquoise	2.4	0.4834	EMPTY	EMPTY	EMPTY	EMPTY	EMPTY	EMPTY	EMPTY	FALSE	FALSE	FALSE	FALSE	FALSE	FALSE
NONCO16125	chr13:53748414-53787739	3.6	ENSMUSG00000063166	222356	ENSMUSG00000021478	263448	-0.36	-0.24	FALSE	NONCO16125	chr13:53748414-53787739	3.6	ENSMUSG00000063166	222356	ENSMUSG00000021478	263448	-0.36	-0.24	0.3482	4	2.7	brown	33	0.8627	EMPTY	0.16	0.13	1.18	0.07	2.29	EMPTY	FALSE	FALSE	FALSE	TRUE	FALSE	FALSE
NONCO16129	chr13:54177928-54181500	0.6	ENSMUSG00000021474	69583	ENSMUSG00000034987	10630	0.36	-0.12	TRUE	NONCO16129	chr13:54177928-54181500	0.6	ENSMUSG00000021474	69583	ENSMUSG00000034987	10630	0.36	-0.12	0.0102	12	13.6	lightcyan	36	0	EMPTY	0.01	0.04	0.31	0.01	1	EMPTY	FALSE	FALSE	FALSE	FALSE	FALSE	FALSE
NONCO16130	chr13:54233183-54236183	1.6	ENSMUSG00000034987	10752	ENSMUSG00000025867	135167	0.91	0.46	TRUE	NONCO16130	chr13:54233183-54236183	1.6	ENSMUSG00000034987	10752	ENSMUSG00000025867	135167	0.91	0.46	0.4325	18	49.7	lightsteelblue1	18.6	0.0177	EMPTY	0.13	0.1	1.33	0.02	8.66	EMPTY	FALSE	FALSE	FALSE	FALSE	FALSE	FALSE
NONCO16135	chr13:54331562-54332794	3.1	ENSMUSG00000034987	109131	ENSMUSG00000025867	38556	-0.16	0.26	FALSE	NONCO16135	chr13:54331562-54332794	3.1	ENSMUSG00000034987	109131	ENSMUSG00000025867	38556	-0.16	0.26	1	13	5.8	blue	14	0.4681	EMPTY	0.01	0.02	0.7	0.03	0.4	EMPTY	FALSE	FALSE	FALSE	FALSE	FALSE	FALSE
NONCO16136	chr13:54478776-54479649	0.3	ENSMUSG00000025872	9928	ENSMUSG00000043183	24131	EMPTY	EMPTY	FALSE	NONCO16136	chr13:54478776-54479649	0.3	ENSMUSG00000025872	9928	ENSMUSG00000043183	24131	EMPTY	EMPTY	1	6	53777.9	midnightblue	3.2	0.1696	EMPTY	0.11	0	Inf	0.14	0.78	EMPTY	FALSE	FALSE	FALSE	FALSE	FALSE	FALSE
NONCO16137	chr13:54482536-54487762	0.7	ENSMUSG00000025872	13688	ENSMUSG00000043183	16018	EMPTY	EMPTY	FALSE	NONCO16137	chr13:54482536-54487762	0.7	ENSMUSG00000025872	13688	ENSMUSG00000043183	16018	EMPTY	EMPTY	0.3708	2	265080	brown	5.4	NA	EMPTY	0.14	0.92	0.15	0.21	0.69	EMPTY	FALSE	FALSE	FALSE	FALSE	FALSE	FALSE
NONCO16147	chr13:55182216-55189611	3.5	ENSMUSG00000005320	13458	ENSMUSG00000021488	20172	-0.13	-0.09	FALSE	NONCO16147	chr13:55182216-55189611	3.5	ENSMUSG00000005320	13458	ENSMUSG00000021488	20172	-0.13	-0.09	0.4325	4	3.6	midnightblue	24.1	0.376	EMPTY	0	0.27	0.01	0.16	0.02	EMPTY	FALSE	FALSE	FALSE	TRUE	TRUE	FALSE
NONCO16169	chr13:56747956-56753811	8	ENSMUSG00000021540	5580	ENSMUSG00000021541	19303	-0.04	-0.35	TRUE	NONCO16169	chr13:56747956-56753811	8	ENSMUSG00000021540	5580	ENSMUSG00000021541	19303	-0.04	-0.35	0.0455	4	2.7	brown	79.1	0.0239	EMPTY	0.01	0.06	0.21	0.08	0.16	EMPTY	FALSE	FALSE	FALSE	TRUE	FALSE	FALSE
NONCO1618	chr1:173783082-173794207	0.5	ENSMUSG00000073489	16140	ENSMUSG00000090272	63014	EMPTY	EMPTY	FALSE	NONCO1618	chr1:173783082-173794207	0.5	ENSMUSG00000073489	16140	ENSMUSG00000090272	63014	EMPTY	EMPTY	1	15	45628.1	brown4	1.5	NA	EMPTY	0	0	3.51	0.05	0.03	EMPTY	FALSE	FALSE	FALSE	TRUE	FALSE	FALSE
NONCO16183	chr13:59166168-59169406	0.6	ENSMUSG00000055254	32199	ENSMUSG00000021557	280132	0.47	-0.09	FALSE	NONCO16183	chr13:59166168-59169406	0.6	ENSMUSG00000055254	32199	ENSMUSG00000021557	280132	0.47	-0.09	1	13	276714	turquoise	11	0.0425	EMPTY	0	0.02	0.2	0.16	0.03	EMPTY	FALSE	FALSE	FALSE	FALSE	FALSE	FALSE
NONCO16184	chr13:59170096-59182974	12.3	ENSMUSG00000055254	36127	ENSMUSG00000021557	266564	0.04	-0.32	FALSE	NONCO16184	chr13:59170096-59182974	12.3	ENSMUSG00000055254	36127	ENSMUSG00000021557	266564	0.04	-0.32	0.6669	2	2.9	violet	36.4	0.6959	EMPTY	0.07	0.02	4.76	0.09	0.83	EMPTY	FALSE	TRUE	FALSE	TRUE	FALSE	FALSE
NONCO16186	chr13:59235788-59255505	0.9	ENSMUSG00000055254	101819	ENSMUSG00000021557	194033	-0.51	0.1	FALSE	NONCO16186	chr13:59235788-59255505	0.9	ENSMUSG00000055254	101819	ENSMUSG00000021557	194033	-0.51	0.1	1	6	362665	midnightblue	7.4	0	EMPTY	0.16	0.01	18.81	0.04	4.55	EMPTY	FALSE	TRUE	FALSE	FALSE	FALSE	FALSE
NONCO16188	chr13:59430845-59432532	1.9	ENSMUSG00000055254	296876	ENSMUSG00000021557	17006	0.14	-0.5	FALSE	NONCO16188	chr13:59430845-59432532	1.9	ENSMUSG00000055254	296876	ENSMUSG00000021557	17006	0.14	-0.5	0.254	18	147720	blue	4.3	0.1072	EMPTY	0.15	0.65	0.22	0.02	8.38	EMPTY	FALSE	FALSE	FALSE	FALSE	FALSE	FALSE
NONCO16196	chr13:61723372-61724509	13.8	ENSMUSG00000074870	153246	ENSMUSG00000074867	405408	EMPTY	EMPTY	FALSE	NONCO16196	chr13:61723372-61724509	13.8	ENSMUSG00000074870	153246	ENSMUSG00000074867	405408	EMPTY	EMPTY	0.4325	16	5.6	darkgreen	25.4	0	EMPTY	0.91	1	0.91	0.19	4.68	EMPTY	FALSE	FALSE	FALSE	FALSE	FALSE	FALSE
NONCO16197	chr13:61799662-61838347	3.8	ENSMUSG00000074870	229536	ENSMUSG00000074867	291570	EMPTY	EMPTY	TRUE	NONCO16197	chr13:61799662-61838347	3.8	ENSMUSG00000074870	229536	ENSMUSG00000074867	291570	EMPTY	EMPTY	0.0084	8	10.1	midnightblue	17.6	0.0012	EMPTY	EMPTY	EMPTY	EMPTY	EMPTY	EMPTY	Gm19961	FALSE	FALSE	FALSE	FALSE	TRUE	FALSE
NONCO16198	chr13:61859707-62053350	17.7	ENSMUSG00000074870	289581	ENSMUSG00000074867	76567	EMPTY	EMPTY	FALSE	NONCO16198	chr13:61859707-62053350	17.7	ENSMUSG00000074870	289581	ENSMUSG00000074867	76567	EMPTY	EMPTY	0.0954	0	2.9	blue	441.2	0.0875	ENSG00000259362	0.62	1	0.62	0.19	3.18	EMPTY	FALSE	FALSE	TRUE	TRUE	FALSE	FALSE
NONCO16199	chr13:62006679-62007213	339.8	ENSMUSG00000074870	436553	ENSMUSG00000074867	122704	EMPTY	EMPTY	TRUE	NONCO16199	chr13:62006679-62007213	339.8	ENSMUSG00000074870	436553	ENSMUSG00000074867	122704	EMPTY	EMPTY	0.0259	0	1.6	turquoise	663.4	0.0024	ENSG00000259362	0.91	0.14	6.43	0.19	4.71	Gm20563	FALSE	FALSE	FALSE	FALSE	TRUE	FALSE
NONCO16201	chr13:62083360-62084128	0.4	ENSMUSG00000074870	513234	ENSMUSG00000074867	45789	EMPTY	EMPTY	FALSE	NONCO16201	chr13:62083360-62084128	0.4	ENSMUSG00000074870	513234	ENSMUSG00000074867	45789	EMPTY	EMPTY	1	7	5.9	brown	2.7	0.8698	ENSG00000259362	EMPTY	EMPTY	EMPTY	EMPTY	EMPTY	EMPTY	FALSE	FALSE	FALSE	FALSE	FALSE	FALSE
NONCO16207	chr13:62668666-62670065	2.3	ENSMUSG00000072066	61168	ENSMUSG00000091183	103544	EMPTY	EMPTY	FALSE	NONCO16207	chr13:62668666-62670065	2.3	ENSMUSG00000072066	61168	ENSMUSG00000091183	103544	EMPTY	EMPTY	1	7	2.1	blue	12.2	0.9867	EMPTY	0	0.14	0.01	0.43	0	EMPTY	FALSE	FALSE	FALSE	FALSE	FALSE	FALSE
NONCO16208	chr13:62813861-62825537	14	ENSMUSG00000091183	36773	ENSMUSG00000021456	11348	EMPTY	EMPTY	FALSE	NONCO16208	chr13:62813861-62825537	14	ENSMUSG00000091183	36773	ENSMUSG00000021456	11348	EMPTY	EMPTY	0.2696	17	2	saddlebrown	85.6	0.5396	EMPTY	0.27	0.02	14.24	0.52	0.52	EMPTY	FALSE	FALSE	FALSE	TRUE	TRUE	FALSE
NONCO16209	chr13:62967411-62968690	17	ENSMUSG00000069805	79130	ENSMUSG00000021458	46245	-0.3	0.04	FALSE	NONCO16209	chr13:62967411-62968690	17	ENSMUSG00000069805	79130	ENSMUSG00000021458	46245	-0.3	0.04	1	9	6.1	brown	4.3	0.3868	EMPTY	0.99	0.4	2.46	0.07	13.63	EMPTY	FALSE	FALSE	FALSE	TRUE	FALSE	FALSE
NONCO16218	chr13:63946277-63946532	0.1	ENSMUSG00000021470	45976	ENSMUSG00000033122	111743	EMPTY	EMPTY	FALSE	NONCO16218	chr13:63946277-63946532	0.1	ENSMUSG00000021470	45976	ENSMUSG00000033122	111743	EMPTY	EMPTY	0.0122	14	69159.8	darkgreen	2.5	0.0748	EMPTY	0.86	0.13	6.63	0.03	34.2	EMPTY	FALSE	FALSE	FALSE	FALSE	TRUE	FALSE
NONCO16222	chr13:64454413-64457552	1.5	ENSMUSG00000021483	14694	ENSMUSG00000096537	23695	EMPTY	EMPTY	FALSE	NONCO16222	chr13:64454413-64457552	1.5	ENSMUSG00000021483	14694	ENSMUSG00000096537	23695	EMPTY	EMPTY	0.5013	8	14.5	midnightblue	4.8	0.0605	EMPTY	0.89	0	307.08	0.01	142.09	EMPTY	FALSE	FALSE	FALSE	FALSE	FALSE	FALSE
NONCO16227	chr13:65415751-65417866	0.3	ENSMUSG00000021514	111531	ENSMUSG00000063905	94813	EMPTY	EMPTY	FALSE	NONCO16227	chr13:65415751-65417866	0.3	ENSMUSG00000021514	111531	ENSMUSG00000063905	94813	EMPTY	EMPTY	0.1619	8	86484	brown	2.1	0.1081	EMPTY	0.04	0.14	0.29	0.34	0.12	EMPTY	FALSE	FALSE	FALSE	FALSE	FALSE	FALSE
NONCO16244	chr13:67884970-67893568	0.8	ENSMUSG00000064063	21048	ENSMUSG00000034617	667213	-0.21	-0.39	FALSE	NONCO16244	chr13:67884970-67893568	0.8	ENSMUSG00000064063	21048	ENSMUSG00000034617	667213	-0.21	-0.39	1	11	83255	brown	1.8	NA	EMPTY	EMPTY	EMPTY	EMPTY	EMPTY	EMPTY	EMPTY	FALSE	FALSE	FALSE	FALSE	FALSE	FALSE
NONCO16245	chr13:67895278-67914590	7.3	ENSMUSG00000064063	31356	ENSMUSG00000034617	646191	-0.63	-0.19	TRUE	NONCO16245	chr13:67895278-67914590	7.3	ENSMUSG00000064063	31356	ENSMUSG00000034617	646191	-0.63	-0.19	0.0069	4	17.2	darkmagenta	4.2	0.0294	EMPTY	EMPTY	EMPTY	EMPTY	EMPTY	EMPTY	EMPTY	FALSE	FALSE	FALSE	FALSE	FALSE	FALSE
NONCO16246	chr13:68156291-68179309	1.7	ENSMUSG00000064063	292369	ENSMUSG00000034617	381472	0.9	0.33	TRUE	NONCO16246	chr13:68156291-68179309	1.7	ENSMUSG00000064063	292369	ENSMUSG00000034617	381472	0.9	0.33	0.0307	14	14	darkgreen	4.2	0.0069	ENSG00000259783	EMPTY	EMPTY	EMPTY	EMPTY	EMPTY	EMPTY	FALSE	FALSE	FALSE	FALSE	FALSE	FALSE
NONCO16250	chr13:69006349-69069949	2.2	ENSMUSG00000021536	6809	ENSMUSG00000034575	428011	-0.01	0.07	FALSE	NONCO16250	chr13:69006349-69069949	2.2	ENSMUSG00000021536	6809	ENSMUSG00000034575	428011	-0.01	0.07	1	7	15.2	brown	17.1	0.3789	EMPTY	0.01	0.14	0.05	0.2	0.03	EMPTY	FALSE	FALSE	FALSE	TRUE	FALSE	FALSE
NONCO16251	chr13:69204472-69416727	2.9	ENSMUSG00000021536	204932	ENSMUSG00000034575	81233	0.28	-0.48	FALSE	NONCO16251	chr13:69204472-69416727	2.9	ENSMUSG00000021536	204932	ENSMUSG00000034575	81233	0.28	-0.48	0.4325	1	3.4	brown	25.3	0.4591	EMPTY	0.01	0.14	0.05	0.13	0.06	EMPTY	FALSE	FALSE	FALSE	TRUE	FALSE	FALSE
NONCO16256	chr13:69682167-69690470	1.1	ENSMUSG00000021595	46388	ENSMUSG00000052981	12366	-0.38	0.11	FALSE	NONCO16256	chr13:69682167-69690470	1.1	ENSMUSG00000021595	46388	ENSMUSG00000052981	12366	-0.38	0.11	0.0634	16	246753	darkgreen	9.6	0.0331	EMPTY	0	0.14	0.01	0.31	0	EMPTY	FALSE	FALSE	FALSE	TRUE	FALSE	FALSE
NONCO16259	chr13:70651170-70656459	0.5	ENSMUSG00000034525	13537	ENSMUSG00000049538	71344	0.39	-0.24	FALSE	NONCO16259	chr13:70651170-70656459	0.5	ENSMUSG00000034525	13537	ENSMUSG00000049538	71344	0.39	-0.24	1	13	136328	turquoise	4.4	0.3348	EMPTY	0.07	0	22.61	0.13	0.49	EMPTY	FALSE	FALSE	FALSE	TRUE	FALSE	FALSE
NONCO16283	chr13:74533653-74534629	17.1	ENSMUSG00000069208	50711	ENSMUSG00000021583	105244	-0.15	-0.64	TRUE	NONCO16283	chr13:74533653-74534629	17.1	ENSMUSG00000069208	50711	ENSMUSG00000021583	105244	-0.15	-0.64	0.002	14	4.4	darkgreen	102.8	0	ENSG00000245719	0.65	0.14	4.59	0.19	3.36	EMPTY	FALSE	FALSE	FALSE	TRUE	TRUE	FALSE
NONCO16284	chr13:74578483-74617706	13.3	ENSMUSG00000069208	95541	ENSMUSG00000021583	22167	0.39	0.65	FALSE	NONCO16284	chr13:74578483-74617706	13.3	ENSMUSG00000069208	95541	ENSMUSG00000021583	22167	0.39	0.65	0.1619	21	4	turquoise	448.6	0.0001	EMPTY	EMPTY	EMPTY	EMPTY	EMPTY	EMPTY	EMPTY	FALSE	TRUE	TRUE	TRUE	FALSE	TRUE
NONCO16286	chr13:75482511-75488680	0.7	ENSMUSG00000021587	350014	ENSMUSG00000001542	218805	-0.34	-0.17	FALSE	NONCO16286	chr13:75482511-75488680	0.7	ENSMUSG00000021587	350014	ENSMUSG00000001542	218805	-0.34	-0.17	0.7225	14	6.2	lightcyan	4.8	0.8465	ENSG00000245719	EMPTY	EMPTY	EMPTY	EMPTY	EMPTY	EMPTY	FALSE	FALSE	FALSE	FALSE	FALSE	FALSE
NONCO16293	chr13:76201892-76211965	0.5	ENSMUSG00000033991	13910	ENSMUSG00000021596	172571	0.22	-0.05	FALSE	NONCO16293	chr13:76201892-76211965	0.5	ENSMUSG00000033991	13910	ENSMUSG00000021596	172571	0.22	-0.05	0.6669	22	26.4	turquoise	1.9	NA	ENSG00000259471	0.73	0.12	6	0.19	3.83	EMPTY	FALSE	FALSE	FALSE	FALSE	FALSE	FALSE
NONCO163	chr1:45857177-45857859	258.7	ENSMUSG00000025995	33559	ENSMUSG00000098549	31667	-0.34	-0.05	FALSE	NONCO163	chr1:45857177-45857859	258.7	ENSMUSG00000025995	33559	ENSMUSG00000098549	31667	-0.34	-0.05	0.0661	6	2.1	midnightblue	779.3	0	EMPTY	0.35	0.14	2.48	0.14	2.49	Gm5526	FALSE	FALSE	FALSE	TRUE	TRUE	FALSE
NONCO16302	chr13:78281925-78282880	0.4	ENSMUSG00000069171	82169	ENSMUSG00000074794	2600505	-0.38	0.51	FALSE	NONCO16302	chr13:78281925-78282880	0.4	ENSMUSG00000069171	82169	ENSMUSG00000074794	2600505	-0.38	0.51	1	13	120126	turquoise	5.4	0.0427	EMPTY	0.06	0.14	0.43	0.19	0.31	EMPTY	FALSE	FALSE	FALSE	FALSE	FALSE	FALSE
NONCO16307	chr13:80957665-80963730	0.6	ENSMUSG00000074794	61631	ENSMUSG00000069170	131339	0.01	0.15	FALSE	NONCO16307	chr13:80957665-80963730	0.6	ENSMUSG00000074794	61631	ENSMUSG00000069170	131339	0.01	0.15	1	17	11.2	turquoise	12.4	0.0833	EMPTY	0.12	0.14	0.81	0.17	0.7	Gm4211	TRUE	TRUE	TRUE	TRUE	FALSE	FALSE
NONCO16308	chr13:81064699-81066543	5.6	ENSMUSG00000074794	168665	ENSMUSG00000069170	28526	-0.28	0.51	FALSE	NONCO16308	chr13:81064699-81066543	5.6	ENSMUSG00000074794	168665	ENSMUSG00000069170	28526	-0.28	0.51	1	7	1.6	salmon4	133.9	0.3574	EMPTY	0.7	0.52	1.35	0.19	3.59	Gm8399	FALSE	FALSE	FALSE	FALSE	TRUE	FALSE
NONCO16313	chr13:81825553-81839846	1.2	ENSMUSG00000021537	28411	ENSMUSG00000005583	1664189	0.09	0.59	FALSE	NONCO16313	chr13:81825553-81839846	1.2	ENSMUSG00000021537	28411	ENSMUSG00000005583	1664189	0.09	0.59	0.254	11	78058.9	turquoise	2.7	0.0294	EMPTY	0.04	0.14	0.28	0.09	0.42	EMPTY	FALSE	TRUE	FALSE	TRUE	FALSE	FALSE
NONCO16314	chr13:82379048-82379355	0.5	ENSMUSG00000021537	581906	ENSMUSG00000005583	1124680	-0.5	0.1	FALSE	NONCO16314	chr13:82379048-82379355	0.5	ENSMUSG00000021537	581906	ENSMUSG00000005583	1124680	-0.5	0.1	0.018	14	25815.8	darkgreen	0.9	NA	EMPTY	1	0	1995.57	0.51	1.97	EMPTY	FALSE	FALSE	FALSE	FALSE	FALSE	FALSE
NONCO16318	chr13:83096155-83148395	0.3	ENSMUSG00000021537	1299013	ENSMUSG00000005583	355640	-0.27	0.77	FALSE	NONCO16318	chr13:83096155-83148395	0.3	ENSMUSG00000021537	1299013	ENSMUSG00000005583	355640	-0.27	0.77	1	13	31780.2	lightsteelblue1	1.4	NA	EMPTY	0.07	0	20.16	0.43	0.16	EMPTY	FALSE	FALSE	FALSE	FALSE	FALSE	FALSE
NONCO16322	chr13:83734080-83741309	7.2	ENSMUSG00000005583	67002	ENSMUSG00000035762	481006	-0.39	-0.38	FALSE	NONCO16322	chr13:83734080-83741309	7.2	ENSMUSG00000005583	67002	ENSMUSG00000035762	481006	-0.39	-0.38	1	7	6.5	midnightblue	7.4	0.5412	EMPTY	0.99	0	275.16	0.32	3.13	C130071C03Rik	FALSE	FALSE	FALSE	TRUE	FALSE	FALSE
NONCO16324	chr13:83832310-83833326	18.4	ENSMUSG00000005583	165232	ENSMUSG00000035762	388989	0.72	0.32	TRUE	NONCO16324	chr13:83832310-83833326	18.4	ENSMUSG00000005583	165232	ENSMUSG00000035762	388989	0.72	0.32	0.0214	18	3.2	lightsteelblue1	132.8	0	EMPTY	0.94	0	259.88	0.29	3.26	EMPTY	FALSE	FALSE	FALSE	FALSE	TRUE	FALSE
NONCO16326	chr13:84025297-84065373	27.8	ENSMUSG00000005583	358219	ENSMUSG00000035762	156942	0.21	0.51	FALSE	NONCO16326	chr13:84025297-84065373	27.8	ENSMUSG00000005583	358219	ENSMUSG00000035762	156942	0.21	0.51	0.3159	22	2.1	brown	108.1	0.2204	EMPTY	1	0.08	12.87	0.63	1.58	Gm17750	FALSE	TRUE	FALSE	TRUE	FALSE	FALSE
NONCO16329	chr13:84348668-84349249	2.6	ENSMUSG00000035762	52799	ENSMUSG00000096449	777751	EMPTY	EMPTY	FALSE	NONCO16329	chr13:84348668-84349249	2.6	ENSMUSG00000035762	52799	ENSMUSG00000096449	777751	EMPTY	EMPTY	0.4073	2	16.8	brown	8.4	0.4726	EMPTY	0.22	0.06	3.71	0.14	1.58	EMPTY	FALSE	FALSE	FALSE	TRUE	FALSE	FALSE
NONCO16349	chr13:91368799-91388129	5.3	ENSMUSG00000021619	144813	ENSMUSG00000003992	72155	0.11	-0.19	FALSE	NONCO16349	chr13:91368799-91388129	5.3	ENSMUSG00000021619	144813	ENSMUSG00000003992	72155	0.11	-0.19	1	17	2.8	brown	95.6	0.7426	EMPTY	0.65	0.19	3.46	0.02	28.38	A830009L08Rik	TRUE	TRUE	FALSE	TRUE	FALSE	FALSE
NONCO16369	chr13:94293666-94306998	1.5	ENSMUSG00000021687	7810	ENSMUSG00000042857	48842	0.01	-0.42	FALSE	NONCO16369	chr13:94293666-94306998	1.5	ENSMUSG00000021687	7810	ENSMUSG00000042857	48842	0.01	-0.42	1	15	10.6	blue	17	0.4799	EMPTY	0.05	0.04	1.35	0.14	0.39	EMPTY	FALSE	FALSE	FALSE	TRUE	TRUE	FALSE
NONCO16379	chr13:97534961-97538631	1.9	ENSMUSG00000041773	281923	ENSMUSG00000069117	221500	0.7	-0.82	FALSE	NONCO16379	chr13:97534961-97538631	1.9	ENSMUSG00000041773	281923	ENSMUSG00000069117	221500	0.7	-0.82	1	15	16.7	turquoise	34.3	0.0427	EMPTY	0.01	0.01	1.04	0.18	0.04	EMPTY	FALSE	TRUE	FALSE	TRUE	FALSE	FALSE
NONCO16384	chr13:98528686-98533921	0.3	ENSMUSG00000092116	36686	ENSMUSG00000046082	101058	EMPTY	EMPTY	FALSE	NONCO16384	chr13:98528686-98533921	0.3	ENSMUSG00000092116	36686	ENSMUSG00000046082	101058	EMPTY	EMPTY	1	11	82958.3	turquoise	3.4	0.212	EMPTY	0.38	0.17	2.23	0.03	11.07	EMPTY	FALSE	FALSE	FALSE	FALSE	FALSE	FALSE
NONCO16385	chr13:98570199-98573450	0.2	ENSMUSG00000092116	78199	ENSMUSG00000046082	61529	EMPTY	EMPTY	FALSE	NONCO16385	chr13:98570199-98573450	0.2	ENSMUSG00000092116	78199	ENSMUSG00000046082	61529	EMPTY	EMPTY	0.4325	21	41748.3	thistle2	1.8	NA	EMPTY	0.12	0.19	0.67	0.07	1.67	EMPTY	FALSE	FALSE	FALSE	TRUE	FALSE	FALSE
NONCO16395	chr13:99526543-99527165	0.8	ENSMUSG00000052727	9942	ENSMUSG00000021647	371320	EMPTY	EMPTY	FALSE	NONCO16395	chr13:99526543-99527165	0.8	ENSMUSG00000052727	9942	ENSMUSG00000021647	371320	EMPTY	EMPTY	1	0	9.3	darkorange	8.6	0.6731	EMPTY	0.01	0.07	0.2	0.08	0.16	EMPTY	FALSE	FALSE	FALSE	FALSE	FALSE	FALSE
NONCO16401	chr13:103591477-103592673	0.2	ENSMUSG00000034751	256981	ENSMUSG00000032621	148943	0.04	-0.24	FALSE	NONCO16401	chr13:103591477-103592673	0.2	ENSMUSG00000034751	256981	ENSMUSG00000032621	148943	0.04	-0.24	1	17	42338.7	lightyellow	1.6	NA	EMPTY	0.02	0.14	0.12	0.08	0.21	EMPTY	FALSE	FALSE	FALSE	FALSE	FALSE	FALSE
NONCO16404	chr13:103929910-103937526	0.4	ENSMUSG00000021709	9397	ENSMUSG00000021710	85914	0.29	0.03	FALSE	NONCO16404	chr13:103929910-103937526	0.4	ENSMUSG00000021709	9397	ENSMUSG00000021710	85914	0.29	0.03	0.7225	9	65683.9	midnightblue	2.8	0.0032	EMPTY	0.12	0.09	1.35	0.23	0.51	EMPTY	FALSE	FALSE	FALSE	FALSE	FALSE	TRUE
NONCO16408	chr13:104597476-104619341	0.3	ENSMUSG00000046169	102714	ENSMUSG00000021715	11800	0.44	0.28	FALSE	NONCO16408	chr13:104597476-104619341	0.3	ENSMUSG00000046169	102714	ENSMUSG00000021715	11800	0.44	0.28	1	11	34.1	lightsteelblue1	4.7	0.4792	EMPTY	0.24	0.01	17.5	0.08	3.07	EMPTY	FALSE	FALSE	FALSE	FALSE	FALSE	FALSE
NONCO16419	chr13:108027763-108034836	0.8	ENSMUSG00000032846	137700	ENSMUSG00000071180	11589	EMPTY	EMPTY	FALSE	NONCO16419	chr13:108027763-108034836	0.8	ENSMUSG00000032846	137700	ENSMUSG00000071180	11589	EMPTY	EMPTY	1	9	20.1	midnightblue	2.8	0.7747	EMPTY	EMPTY	EMPTY	EMPTY	EMPTY	EMPTY	EMPTY	FALSE	FALSE	FALSE	FALSE	FALSE	FALSE
NONCO1642	chr1:178299349-178300381	77.7	ENSMUSG00000026502	42049	ENSMUSG00000026500	18750	EMPTY	EMPTY	FALSE	NONCO1642	chr1:178299349-178300381	77.7	ENSMUSG00000026502	42049	ENSMUSG00000026500	18750	EMPTY	EMPTY	0.1619	6	3.2	midnightblue	13.9	0.2415	EMPTY	1	0.01	95.65	0.17	5.83	RP24-252K15.3	FALSE	FALSE	FALSE	TRUE	TRUE	FALSE
NONCO16424	chr13:108307914-108310813	0.7	ENSMUSG00000021696	20810	ENSMUSG00000021697	5520	-0.39	0.39	FALSE	NONCO16424	chr13:108307914-108310813	0.7	ENSMUSG00000021696	20810	ENSMUSG00000021697	5520	-0.39	0.39	0.1367	14	11.3	darkgreen	6.9	0.4698	EMPTY	0.96	0.09	10.51	0.04	25.44	EMPTY	FALSE	FALSE	FALSE	TRUE	FALSE	FALSE
NONCO16425	chr13:108309011-108309379	0.1	ENSMUSG00000021696	21907	ENSMUSG00000021697	6954	-0.44	0.02	FALSE	NONCO16425	chr13:108309011-108309379	0.1	ENSMUSG00000021696	21907	ENSMUSG00000021697	6954	-0.44	0.02	1	13	14397.2	white	0.6	NA	EMPTY	0.48	0.09	5.27	0.19	2.48	EMPTY	FALSE	FALSE	FALSE	FALSE	FALSE	FALSE
NONCO16436	chr13:110757896-110784831	0.3	ENSMUSG00000021701	357053	ENSMUSG00000055194	470183	EMPTY	EMPTY	FALSE	NONCO16436	chr13:110757896-110784831	0.3	ENSMUSG00000021701	357053	ENSMUSG00000055194	470183	EMPTY	EMPTY	0.0548	22	63359.8	lightsteelblue1	1.9	NA	EMPTY	0	0.06	0.08	0.02	0.2	EMPTY	FALSE	FALSE	FALSE	FALSE	FALSE	FALSE
NONCO16438	chr13:111361199-111368680	1.5	ENSMUSG00000055194	103451	ENSMUSG00000032745	57001	EMPTY	EMPTY	TRUE	NONCO16438	chr13:111361199-111368680	1.5	ENSMUSG00000055194	103451	ENSMUSG00000032745	57001	EMPTY	EMPTY	0.0259	10	7.1	midnightblue	13.5	0.0007	ENSG00000227885	0.02	0.01	3.05	0.02	0.93	Gm15285,Gm15289,Gm6270	FALSE	FALSE	FALSE	FALSE	TRUE	FALSE
NONCO1644	chr1:178369934-178372478	0.2	ENSMUSG00000039630	32138	ENSMUSG00000026495	33608	-0.24	0.47	FALSE	NONCO1644	chr1:178369934-178372478	0.2	ENSMUSG00000039630	32138	ENSMUSG00000026495	33608	-0.24	0.47	0.7666	0	12.7	darkorange	4.3	0.8948	EMPTY	0.62	0.01	88.68	0.2	3.08	EMPTY	FALSE	FALSE	FALSE	FALSE	FALSE	FALSE
NONCO16443	chr13:111901195-111943870	0.8	ENSMUSG00000021754	92203	ENSMUSG00000049985	344582	-0.15	0.09	FALSE	NONCO16443	chr13:111901195-111943870	0.8	ENSMUSG00000021754	92203	ENSMUSG00000049985	344582	-0.15	0.09	1	9	5.7	lightyellow	4.1	0.9761	EMPTY	0	0.01	0.3	0.03	0.09	EMPTY	FALSE	FALSE	FALSE	TRUE	FALSE	FALSE
NONCO16447	chr13:113419637-113423938	0.7	ENSMUSG00000021763	39927	ENSMUSG00000042364	168243	-0.2	0.03	FALSE	NONCO16447	chr13:113419637-113423938	0.7	ENSMUSG00000021763	39927	ENSMUSG00000042364	168243	-0.2	0.03	1	11	199162	white	5	0.0511	EMPTY	0.01	0.34	0.04	0.03	0.4	EMPTY	FALSE	FALSE	FALSE	TRUE	FALSE	FALSE
NONCO16449	chr13:113691186-113736288	2.1	ENSMUSG00000051456	27511	ENSMUSG00000042348	58218	-0.1	-0.35	FALSE	NONCO16449	chr13:113691186-113736288	2.1	ENSMUSG00000051456	27511	ENSMUSG00000042348	58218	-0.1	-0.35	1	7	3.5	greenyellow	18.7	0.8452	EMPTY	0.02	0.02	0.86	0.06	0.36	EMPTY	FALSE	FALSE	FALSE	TRUE	FALSE	FALSE
NONCO16453	chr13:116723601-116782934	0.6	ENSMUSG00000042258	413913	ENSMUSG00000021725	71891	-0.14	-0.12	FALSE	NONCO16453	chr13:116723601-116782934	0.6	ENSMUSG00000042258	413913	ENSMUSG00000021725	71891	-0.14	-0.12	0.2979	12	5.8	greenyellow	2.9	0.6256	EMPTY	0	0.14	0.03	0.07	0.06	EMPTY	FALSE	FALSE	FALSE	FALSE	FALSE	FALSE
NONCO16463	chr13:118330847-118374981	0.4	ENSMUSG00000021730	354046	ENSMUSG00000021731	5130	0.05	0.54	FALSE	NONCO16463	chr13:118330847-118374981	0.4	ENSMUSG00000021730	354046	ENSMUSG00000021731	5130	0.05	0.54	0.0634	4	99009.9	lightyellow	2.1	0.0173	EMPTY	0.09	0.75	0.12	0.14	0.63	EMPTY	FALSE	FALSE	FALSE	FALSE	FALSE	FALSE
NONCO16472	chr13:120044479-120052219	0.5	ENSMUSG00000095609	9149	ENSMUSG00000096323	102409	EMPTY	EMPTY	FALSE	NONCO16472	chr13:120044479-120052219	0.5	ENSMUSG00000095609	9149	ENSMUSG00000096323	102409	EMPTY	EMPTY	1	15	2.4	saddlebrown	6.3	0.8971	EMPTY	0.08	1	0.08	0.39	0.21	EMPTY	FALSE	FALSE	FALSE	FALSE	FALSE	FALSE
NONCO16482	chr14:7749945-7775528	0.7	ENSMUSG00000063277	105974	ENSMUSG00000097169	16060	EMPTY	EMPTY	FALSE	NONCO16482	chr14:7749945-7775528	0.7	ENSMUSG00000063277	105974	ENSMUSG00000097169	16060	EMPTY	EMPTY	1	7	13.1	salmon4	11.7	0.2601	EMPTY	0.14	0.05	3.08	0.08	1.71	Gm16741	TRUE	FALSE	FALSE	TRUE	FALSE	FALSE
NONCO16483	chr14:7755334-7771297	0.4	ENSMUSG00000063277	111363	ENSMUSG00000097169	20291	EMPTY	EMPTY	FALSE	NONCO16483	chr14:7755334-7771297	0.4	ENSMUSG00000063277	111363	ENSMUSG00000097169	20291	EMPTY	EMPTY	0.254	20	35847.1	paleturquoise	1.3	NA	EMPTY	0.08	0.05	1.68	0.15	0.52	Gm10044	FALSE	FALSE	FALSE	FALSE	FALSE	FALSE
NONCO16486	chr14:8062927-8065197	2	ENSMUSG00000025277	6373	ENSMUSG00000023156	15171	EMPTY	EMPTY	FALSE	NONCO16486	chr14:8062927-8065197	2	ENSMUSG00000025277	6373	ENSMUSG00000023156	15171	EMPTY	EMPTY	0.8278	22	2.4	turquoise	21.3	0.9463	EMPTY	0.04	0	41.16	0.18	0.24	EMPTY	FALSE	FALSE	FALSE	TRUE	FALSE	FALSE
NONCO16490	chr14:8206321-8207978	0.4	ENSMUSG00000021748	33330	ENSMUSG00000021752	6171	-0.07	0	FALSE	NONCO16490	chr14:8206321-8207978	0.4	ENSMUSG00000021748	33330	ENSMUSG00000021752	6171	-0.07	0	1	9	95046.8	white	3.6	0.628	ENSG00000237874	0.04	0.05	0.71	0.03	1.25	EMPTY	FALSE	FALSE	FALSE	FALSE	FALSE	FALSE
NONCO16519	chr14:17084888-17085415	0.2	ENSMUSG00000017491	509417	ENSMUSG00000021779	575546	-0.16	-0.02	FALSE	NONCO16519	chr14:17084888-17085415	0.2	ENSMUSG00000017491	509417	ENSMUSG00000021779	575546	-0.16	-0.02	0.6291	16	43780.3	darkgreen	2.6	0.3644	EMPTY	0	0.14	0.02	0.06	0.04	EMPTY	FALSE	FALSE	FALSE	FALSE	FALSE	FALSE
NONCO16520	chr14:17171999-17177206	0.3	ENSMUSG00000017491	596528	ENSMUSG00000021779	483755	0.25	-0.24	FALSE	NONCO16520	chr14:17171999-17177206	0.3	ENSMUSG00000017491	596528	ENSMUSG00000021779	483755	0.25	-0.24	1	17	60665	ivory	3.1	0.7559	EMPTY	0.05	0.14	0.32	0.08	0.58	EMPTY	FALSE	FALSE	FALSE	TRUE	FALSE	FALSE
NONCO16521	chr14:17522777-17523970	0.1	ENSMUSG00000017491	947306	ENSMUSG00000021779	136991	-0.01	-0.04	FALSE	NONCO16521	chr14:17522777-17523970	0.1	ENSMUSG00000017491	947306	ENSMUSG00000021779	136991	-0.01	-0.04	0.7666	18	17240.3	darkgreen	0.6	NA	EMPTY	0.46	0.01	54.72	0.02	22.84	EMPTY	FALSE	FALSE	FALSE	FALSE	FALSE	FALSE
NONCO16526	chr14:18542762-18545173	16.8	ENSMUSG00000021774	210904	ENSMUSG00000058317	28403	0.41	-0.13	FALSE	NONCO16526	chr14:18542762-18545173	16.8	ENSMUSG00000021774	210904	ENSMUSG00000058317	28403	0.41	-0.13	0.0954	12	6.4	darkgreen	40.6	0.0001	ENSG00000242671	0.91	0.02	38	0.09	10.71	EMPTY	FALSE	FALSE	FALSE	TRUE	FALSE	FALSE
NONCO16528	chr14:19042222-19087667	0.3	ENSMUSG00000058317	147956	ENSMUSG00000093814	314061	EMPTY	EMPTY	FALSE	NONCO16528	chr14:19042222-19087667	0.3	ENSMUSG00000058317	147956	ENSMUSG00000093814	314061	EMPTY	EMPTY	1	11	58278.2	brown	3	0.2572	EMPTY	0.02	0.14	0.15	0.19	0.11	EMPTY	FALSE	FALSE	FALSE	TRUE	TRUE	FALSE
NONCO16535	chr14:20209831-20221602	2.1	ENSMUSG00000023243	28050	ENSMUSG00000023387	41155	EMPTY	EMPTY	FALSE	NONCO16535	chr14:20209831-20221602	2.1	ENSMUSG00000023243	28050	ENSMUSG00000023387	41155	EMPTY	EMPTY	0.6669	4	206.6	brown	12	0.0739	EMPTY	0.06	0.08	0.81	0.11	0.58	EMPTY	FALSE	FALSE	FALSE	TRUE	FALSE	FALSE
NONCO1654	chr1:179912422-179917483	1.2	ENSMUSG00000073486	107747	ENSMUSG00000026490	42990	EMPTY	EMPTY	FALSE	NONCO1654	chr1:179912422-179917483	1.2	ENSMUSG00000073486	107747	ENSMUSG00000026490	42990	EMPTY	EMPTY	0.1367	16	95452.2	brown4	5.6	0.0895	EMPTY	0.07	0.08	0.85	0.38	0.19	EMPTY	FALSE	FALSE	FALSE	FALSE	FALSE	FALSE
NONCO16547	chr14:20641001-20644017	5.5	ENSMUSG00000034235	22648	ENSMUSG00000068697	5086	EMPTY	EMPTY	FALSE	NONCO16547	chr14:20641001-20644017	5.5	ENSMUSG00000034235	22648	ENSMUSG00000068697	5086	EMPTY	EMPTY	0.193	10	3.8	midnightblue	93.3	0.0024	EMPTY	0.22	0.01	29.21	0.02	12.69	EMPTY	FALSE	FALSE	FALSE	TRUE	FALSE	FALSE
NONCO16563	chr14:24390932-24391221	3.8	ENSMUSG00000038925	80967	ENSMUSG00000025280	57474	-0.25	0.55	FALSE	NONCO16563	chr14:24390932-24391221	3.8	ENSMUSG00000038925	80967	ENSMUSG00000025280	57474	-0.25	0.55	0.1367	22	7.5	turquoise	12.8	0.2063	EMPTY	0.06	0.02	3.46	0.19	0.31	EMPTY	FALSE	FALSE	FALSE	FALSE	FALSE	FALSE
NONCO16568	chr14:25127933-25147889	1.7	ENSMUSG00000025290	631788	ENSMUSG00000007817	311297	-0.14	0.04	FALSE	NONCO16568	chr14:25127933-25147889	1.7	ENSMUSG00000025290	631788	ENSMUSG00000007817	311297	-0.14	0.04	1	11	8.1	turquoise	32.5	0.4923	ENSG00000261763	0.02	0	4.7	0.02	1.03	EMPTY	FALSE	TRUE	FALSE	TRUE	FALSE	FALSE
NONCO16570	chr14:25379322-25382958	1.2	ENSMUSG00000025290	883177	ENSMUSG00000007817	76228	0.26	0.03	FALSE	NONCO16570	chr14:25379322-25382958	1.2	ENSMUSG00000025290	883177	ENSMUSG00000007817	76228	0.26	0.03	0.9417	0	33.9	brown	15.5	0.2947	EMPTY	0.07	0.02	3.25	0.01	8.05	EMPTY	FALSE	FALSE	FALSE	FALSE	FALSE	FALSE
NONCO16583	chr14:27141597-27152976	1	ENSMUSG00000040717	34312	ENSMUSG00000021895	85064	-0.11	0.39	FALSE	NONCO16583	chr14:27141597-27152976	1	ENSMUSG00000040717	34312	ENSMUSG00000021895	85064	-0.11	0.39	0.1539	19	187261	blue	4.7	0.0315	EMPTY	0.85	0.14	5.95	0.02	40.47	EMPTY	FALSE	FALSE	FALSE	TRUE	FALSE	FALSE
NONCO16586	chr14:27551214-27556020	4.9	ENSMUSG00000046753	42755	ENSMUSG00000040640	66423	-0.31	-0.31	FALSE	NONCO16586	chr14:27551214-27556020	4.9	ENSMUSG00000046753	42755	ENSMUSG00000040640	66423	-0.31	-0.31	0.1619	12	11.8	saddlebrown	6.4	0.0631	EMPTY	0.81	0.14	5.71	0.13	6.19	EMPTY	FALSE	FALSE	FALSE	FALSE	FALSE	FALSE
NONCO16611	chr14:31687268-31689024	2	ENSMUSG00000021900	18690	ENSMUSG00000014496	10992	0.56	-0.25	FALSE	NONCO16611	chr14:31687268-31689024	2	ENSMUSG00000021900	18690	ENSMUSG00000014496	10992	0.56	-0.25	1	22	52.2	blue	7.4	0.222	ENSG00000249725	EMPTY	EMPTY	EMPTY	EMPTY	EMPTY	EMPTY	FALSE	FALSE	FALSE	FALSE	FALSE	FALSE
NONCO16621	chr14:33522940-33575027	0.4	ENSMUSG00000021936	75783	ENSMUSG00000021940	14244	0.07	0.26	FALSE	NONCO16621	chr14:33522940-33575027	0.4	ENSMUSG00000021936	75783	ENSMUSG00000021940	14244	0.07	0.26	1	15	8	turquoise	4.2	0.8989	EMPTY	0.28	0.01	19.16	0.07	3.98	EMPTY	FALSE	TRUE	FALSE	FALSE	FALSE	FALSE
NONCO1663	chr1:180777422-180778451	0.2	ENSMUSG00000026499	23219	ENSMUSG00000060743	22382	-0.27	0.15	FALSE	NONCO1663	chr1:180777422-180778451	0.2	ENSMUSG00000026499	23219	ENSMUSG00000060743	22382	-0.27	0.15	0.8278	8	51.4	lightcyan	3.8	0.1227	ENSG00000237087	0.15	0.14	1.07	0.12	1.26	EMPTY	FALSE	FALSE	FALSE	TRUE	FALSE	FALSE
NONCO16634	chr14:34759402-34770553	0.6	ENSMUSG00000041408	11420	ENSMUSG00000041078	49273	-0.47	-0.31	FALSE	NONCO16634	chr14:34759402-34770553	0.6	ENSMUSG00000041408	11420	ENSMUSG00000041078	49273	-0.47	-0.31	1	17	9.3	thistle2	13.3	0.5422	EMPTY	0.12	1	0.12	0.17	0.7	A930038B10Rik	TRUE	FALSE	TRUE	TRUE	FALSE	FALSE
NONCO16653	chr14:41424684-41431002	2.8	ENSMUSG00000092142	16404	ENSMUSG00000093863	17202	EMPTY	EMPTY	FALSE	NONCO16653	chr14:41424684-41431002	2.8	ENSMUSG00000092142	16404	ENSMUSG00000093863	17202	EMPTY	EMPTY	1	17	5.1	blue	22.1	0.8649	EMPTY	EMPTY	EMPTY	EMPTY	EMPTY	EMPTY	EMPTY	FALSE	FALSE	FALSE	TRUE	FALSE	FALSE
NONCO16665	chr14:45858038-45866396	9.9	ENSMUSG00000037697	199896	ENSMUSG00000079261	513019	EMPTY	EMPTY	TRUE	NONCO16665	chr14:45858038-45866396	9.9	ENSMUSG00000037697	199896	ENSMUSG00000079261	513019	EMPTY	EMPTY	0.0455	8	93524.3	brown	2.9	0.0029	EMPTY	0.07	0.04	1.57	0.18	0.37	Gm8317	FALSE	FALSE	FALSE	FALSE	TRUE	FALSE
NONCO16677	chr14:48079119-48087261	374.5	ENSMUSG00000021843	342556	ENSMUSG00000021846	33609	-0.57	0.65	TRUE	NONCO16677	chr14:48079119-48087261	374.5	ENSMUSG00000021843	342556	ENSMUSG00000021846	33609	-0.57	0.65	0.018	21	3.3	turquoise	848.5	0	EMPTY	0.68	0	339.74	0.11	6.27	Gm6055	FALSE	FALSE	FALSE	TRUE	TRUE	FALSE
NONCO16682	chr14:49127196-49162294	7	ENSMUSG00000036291	39474	ENSMUSG00000036282	9933	EMPTY	EMPTY	FALSE	NONCO16682	chr14:49127196-49162294	7	ENSMUSG00000036291	39474	ENSMUSG00000036282	9933	EMPTY	EMPTY	1	9	2.7	greenyellow	14	0.8607	EMPTY	0.22	0.25	0.88	0.19	1.13	EMPTY	FALSE	FALSE	FALSE	FALSE	FALSE	FALSE
NONCO16689	chr14:49807038-49823371	30.7	ENSMUSG00000036242	23656	ENSMUSG00000048933	70890	EMPTY	EMPTY	TRUE	NONCO16689	chr14:49807038-49823371	30.7	ENSMUSG00000036242	23656	ENSMUSG00000048933	70890	EMPTY	EMPTY	0.0455	18	25.2	paleturquoise	17.4	0	EMPTY	0.33	0.22	1.5	0.02	13.71	EMPTY	FALSE	FALSE	FALSE	FALSE	FALSE	FALSE
NONCO16695	chr14:50970493-50972105	1.9	ENSMUSG00000021871	5257	ENSMUSG00000021872	35647	0.39	0.6	FALSE	NONCO16695	chr14:50970493-50972105	1.9	ENSMUSG00000021871	5257	ENSMUSG00000021872	35647	0.39	0.6	0.4726	11	5.7	turquoise	32.5	0.3441	EMPTY	0.2	0	61.66	0.23	0.86	EMPTY	FALSE	FALSE	FALSE	FALSE	FALSE	FALSE
NONCO16696	chr14:50978177-50996310	36.5	ENSMUSG00000021871	12941	ENSMUSG00000021872	11442	-0.07	-0.31	FALSE	NONCO16696	chr14:50978177-50996310	36.5	ENSMUSG00000021871	12941	ENSMUSG00000021872	11442	-0.07	-0.31	0.0795	9	4.4	midnightblue	111.9	0	EMPTY	0.64	0.15	4.16	0.28	2.29	EMPTY	FALSE	FALSE	FALSE	TRUE	TRUE	FALSE
NONCO16735	chr14:53676141-53676629	0.2	ENSMUSG00000096038	338504	ENSMUSG00000087666	118732	EMPTY	EMPTY	FALSE	NONCO16735	chr14:53676141-53676629	0.2	ENSMUSG00000096038	338504	ENSMUSG00000087666	118732	EMPTY	EMPTY	0.5461	0	11967.9	lightyellow	0.6	NA	EMPTY	0.3	0.23	1.32	0.2	1.54	Trav9-4	TRUE	FALSE	FALSE	TRUE	FALSE	FALSE
NONCO16741	chr14:53665895-53777575	7.6	ENSMUSG00000096038	328258	ENSMUSG00000087666	17786	EMPTY	EMPTY	FALSE	NONCO16741	chr14:53665895-53777575	7.6	ENSMUSG00000096038	328258	ENSMUSG00000087666	17786	EMPTY	EMPTY	0.2287	4	3.7	violet	39.9	0.5824	EMPTY	0.13	0.01	13.69	0.06	2.21	Trav3-3,Trav3-4	TRUE	FALSE	FALSE	TRUE	FALSE	FALSE
NONCO16756	chr14:54072478-54073769	0.5	ENSMUSG00000087666	274647	ENSMUSG00000022174	161711	EMPTY	EMPTY	FALSE	NONCO16756	chr14:54072478-54073769	0.5	ENSMUSG00000087666	274647	ENSMUSG00000022174	161711	EMPTY	EMPTY	1	7	76440.9	brown4	2.9	0.2561	EMPTY	0.06	0.27	0.22	0.33	0.19	EMPTY	FALSE	FALSE	FALSE	TRUE	FALSE	FALSE
NONCO16758	chr14:54153554-54154509	1.2	ENSMUSG00000087666	355723	ENSMUSG00000022174	80971	EMPTY	EMPTY	TRUE	NONCO16758	chr14:54153554-54154509	1.2	ENSMUSG00000087666	355723	ENSMUSG00000022174	80971	EMPTY	EMPTY	0.0443	20	265207	blue	11.1	0	EMPTY	0	0.07	0.07	0.1	0.05	EMPTY	FALSE	FALSE	FALSE	FALSE	FALSE	FALSE
NONCO16780	chr14:55815104-55815984	0.8	ENSMUSG00000022221	26248	ENSMUSG00000023411	8812	0.2	-0.12	FALSE	NONCO16780	chr14:55815104-55815984	0.8	ENSMUSG00000022221	26248	ENSMUSG00000023411	8812	0.2	-0.12	0.4726	4	7.1	brown	4.7	0.5743	EMPTY	0.12	0.04	3.13	0.19	0.64	EMPTY	FALSE	FALSE	FALSE	TRUE	FALSE	FALSE
NONCO16782	chr14:56010173-56011448	14.8	ENSMUSG00000068289	36179	ENSMUSG00000022227	6517	EMPTY	EMPTY	FALSE	NONCO16782	chr14:56010173-56011448	14.8	ENSMUSG00000068289	36179	ENSMUSG00000022227	6517	EMPTY	EMPTY	0.2287	9	5.8	brown	49.1	0.0003	ENSG00000235257	0.96	0.03	37.87	0.09	10.9	EMPTY	FALSE	FALSE	FALSE	FALSE	TRUE	FALSE
NONCO16790	chr14:57161315-57171626	0.6	ENSMUSG00000040055	27705	ENSMUSG00000021947	103409	0.06	0	FALSE	NONCO16790	chr14:57161315-57171626	0.6	ENSMUSG00000040055	27705	ENSMUSG00000021947	103409	0.06	0	1	13	53358.9	white	1.8	NA	EMPTY	0.08	0.14	0.56	0.13	0.61	EMPTY	FALSE	FALSE	FALSE	TRUE	FALSE	FALSE
NONCO16820	chr14:61075425-61078266	0.1	ENSMUSG00000060548	28571	ENSMUSG00000048279	60192	0.44	0.26	FALSE	NONCO16820	chr14:61075425-61078266	0.1	ENSMUSG00000060548	28571	ENSMUSG00000048279	60192	0.44	0.26	0.1817	20	54152.4	turquoise	1.5	NA	EMPTY	0.26	0	234.68	0.09	2.86	EMPTY	FALSE	TRUE	FALSE	FALSE	FALSE	FALSE
NONCO1683	chr1:182082895-182103615	0.3	ENSMUSG00000022995	62906	ENSMUSG00000026511	21123	-0.1	-0.27	FALSE	NONCO1683	chr1:182082895-182103615	0.3	ENSMUSG00000022995	62906	ENSMUSG00000026511	21123	-0.1	-0.27	0.9417	18	4.2	paleturquoise	1.8	NA	EMPTY	0.04	0.05	0.78	0.11	0.38	EMPTY	FALSE	FALSE	FALSE	FALSE	FALSE	TRUE
NONCO16836	chr14:62813034-62813657	2.1	ENSMUSG00000035161	51923	ENSMUSG00000014547	24034	-0.2	-0.33	FALSE	NONCO16836	chr14:62813034-62813657	2.1	ENSMUSG00000035161	51923	ENSMUSG00000014547	24034	-0.2	-0.33	1	7	26.2	brown	7.6	0.3014	EMPTY	0.08	0.06	1.41	0.13	0.62	EMPTY	FALSE	FALSE	FALSE	FALSE	FALSE	FALSE
NONCO16843	chr14:63828441-63852206	3.3	ENSMUSG00000035067	7633	ENSMUSG00000021958	8107	-0.25	0.11	FALSE	NONCO16843	chr14:63828441-63852206	3.3	ENSMUSG00000035067	7633	ENSMUSG00000021958	8107	-0.25	0.11	0.3159	22	4.4	turquoise	78.8	0	EMPTY	0.42	0.9	0.47	0.36	1.15	EMPTY	FALSE	FALSE	FALSE	FALSE	FALSE	FALSE
NONCO16850	chr14:64587219-64594567	10.2	ENSMUSG00000054733	131317	ENSMUSG00000060012	57965	-0.11	0.62	FALSE	NONCO16850	chr14:64587219-64594567	10.2	ENSMUSG00000054733	131317	ENSMUSG00000060012	57965	-0.11	0.62	0.3708	14	4.2	blue	256	0.0114	EMPTY	0.19	0	69.09	0.19	0.99	A930011O12Rik	FALSE	FALSE	TRUE	TRUE	FALSE	FALSE
NONCO16851	chr14:64624584-64638187	0.7	ENSMUSG00000054733	168682	ENSMUSG00000060012	14345	0.17	0.01	FALSE	NONCO16851	chr14:64624584-64638187	0.7	ENSMUSG00000054733	168682	ENSMUSG00000060012	14345	0.17	0.01	1	17	36073.4	brown4	1.9	NA	EMPTY	0.31	0.04	8.54	0.16	2	EMPTY	FALSE	FALSE	FALSE	TRUE	FALSE	FALSE
NONCO16856	chr14:65108449-65117182	1.5	ENSMUSG00000021978	10344	ENSMUSG00000007989	83845	0.03	-0.25	FALSE	NONCO16856	chr14:65108449-65117182	1.5	ENSMUSG00000021978	10344	ENSMUSG00000007989	83845	0.03	-0.25	0.8745	5	4.8	brown	32.1	0.4681	EMPTY	0.15	0.14	1.07	0.13	1.19	EMPTY	FALSE	FALSE	FALSE	TRUE	FALSE	FALSE
NONCO16857	chr14:65118682-65121520	0.2	ENSMUSG00000021978	20577	ENSMUSG00000007989	79507	-0.34	-0.34	FALSE	NONCO16857	chr14:65118682-65121520	0.2	ENSMUSG00000021978	20577	ENSMUSG00000007989	79507	-0.34	-0.34	1	11	48437.6	turquoise	2.2	0.6669	EMPTY	0.13	0.14	0.91	0.19	0.7	EMPTY	FALSE	FALSE	FALSE	FALSE	FALSE	FALSE
NONCO16858	chr14:65145860-65149012	1	ENSMUSG00000021978	47755	ENSMUSG00000007989	52015	0.24	-0.59	FALSE	NONCO16858	chr14:65145860-65149012	1	ENSMUSG00000021978	47755	ENSMUSG00000007989	52015	0.24	-0.59	0.4073	18	251608	orange	16.2	0.0633	EMPTY	0.21	0.14	1.48	0.04	5.02	EMPTY	FALSE	FALSE	FALSE	TRUE	FALSE	FALSE
NONCO16869	chr14:66318059-66319623	0.2	ENSMUSG00000022043	6636	ENSMUSG00000022044	24674	-0.3	0.02	FALSE	NONCO16869	chr14:66318059-66319623	0.2	ENSMUSG00000022043	6636	ENSMUSG00000022044	24674	-0.3	0.02	0.9417	5	192191	brown	3.5	0.0221	EMPTY	0.02	0.14	0.17	0.1	0.24	EMPTY	FALSE	FALSE	FALSE	FALSE	FALSE	FALSE
NONCO16873	chr14:66967104-66969743	3.2	ENSMUSG00000046204	47051	ENSMUSG00000022051	15497	0.27	-0.69	FALSE	NONCO16873	chr14:66967104-66969743	3.2	ENSMUSG00000046204	47051	ENSMUSG00000022051	15497	0.27	-0.69	0.1085	17	50.9	darkgreen	13.1	0	EMPTY	0.98	0.14	6.9	0.43	2.27	EMPTY	FALSE	FALSE	FALSE	FALSE	FALSE	FALSE
NONCO169	chr1:47050725-47194912	0.9	ENSMUSG00000025986	157874	ENSMUSG00000026109	3705736	-0.04	-0.17	FALSE	NONCO169	chr1:47050725-47194912	0.9	ENSMUSG00000025986	157874	ENSMUSG00000026109	3705736	-0.04	-0.17	1	13	81.5	brown4	12.1	0.2733	EMPTY	0.14	0.08	1.76	0.02	7.62	EMPTY	FALSE	FALSE	FALSE	FALSE	FALSE	FALSE
NONCO16908	chr14:72813722-72841817	0.8	ENSMUSG00000033487	103720	ENSMUSG00000033470	187312	0.01	-0.06	FALSE	NONCO16908	chr14:72813722-72841817	0.8	ENSMUSG00000033487	103720	ENSMUSG00000033470	187312	0.01	-0.06	0.6291	20	102662	brown4	3.9	0.0886	EMPTY	0.24	0	Inf	0.15	1.58	EMPTY	FALSE	FALSE	FALSE	FALSE	FALSE	FALSE
NONCO16910	chr14:72982032-72986680	0.8	ENSMUSG00000033487	272030	ENSMUSG00000033470	42449	0.04	-0.36	FALSE	NONCO16910	chr14:72982032-72986680	0.8	ENSMUSG00000033487	272030	ENSMUSG00000033470	42449	0.04	-0.36	1	7	8.6	brown4	6.3	0.9618	ENSG00000236393	0.44	0.14	3.08	0.44	1	EMPTY	FALSE	FALSE	FALSE	FALSE	FALSE	FALSE
NONCO16915	chr14:73732431-73846145	0.8	ENSMUSG00000096463	69711	ENSMUSG00000034997	794696	EMPTY	EMPTY	FALSE	NONCO16915	chr14:73732431-73846145	0.8	ENSMUSG00000096463	69711	ENSMUSG00000034997	794696	EMPTY	EMPTY	0.8745	16	60837.1	brown4	2.7	0.662	EMPTY	0.04	0.19	0.23	0.19	0.23	EMPTY	FALSE	FALSE	FALSE	FALSE	FALSE	FALSE
NONCO16922	chr14:75866091-75868416	0.7	ENSMUSG00000060126	17567	ENSMUSG00000067995	28522	-0.43	-0.18	FALSE	NONCO16922	chr14:75866091-75868416	0.7	ENSMUSG00000060126	17567	ENSMUSG00000067995	28522	-0.43	-0.18	0.3159	22	2.8	turquoise	22.3	0.8719	EMPTY	0.15	0.16	0.95	0.02	6.36	EMPTY	FALSE	FALSE	FALSE	FALSE	FALSE	FALSE
NONCO16925	chr14:76251217-76252328	15.4	ENSMUSG00000095427	13865	ENSMUSG00000022010	162634	0.61	-0.16	FALSE	NONCO16925	chr14:76251217-76252328	15.4	ENSMUSG00000095427	13865	ENSMUSG00000022010	162634	0.61	-0.16	0.254	6	86.1	brown4	84	0.3859	EMPTY	0.07	0.1	0.7	0.01	7.22	EMPTY	FALSE	FALSE	FALSE	TRUE	FALSE	FALSE
NONCO1694	chr1:184610256-184617964	0.9	ENSMUSG00000039384	534621	ENSMUSG00000039377	109177	0.25	0.55	FALSE	NONCO1694	chr1:184610256-184617964	0.9	ENSMUSG00000039384	534621	ENSMUSG00000039377	109177	0.25	0.55	1	9	138456	white	5.3	0.1424	EMPTY	0	0.14	0.02	0.02	0.16	RP24-286C21.1	FALSE	FALSE	FALSE	TRUE	FALSE	FALSE
NONCO16954	chr14:79699485-79715475	4.3	ENSMUSG00000022025	37316	ENSMUSG00000036422	51301	0.33	-0.36	FALSE	NONCO16954	chr14:79699485-79715475	4.3	ENSMUSG00000022025	37316	ENSMUSG00000036422	51301	0.33	-0.36	0.0661	0	8.4	turquoise	69.9	0.1139	EMPTY	0.03	0.31	0.08	0	7.28	EMPTY	FALSE	TRUE	FALSE	TRUE	FALSE	FALSE
NONCO16958	chr14:84758445-84759083	2.5	ENSMUSG00000035566	221386	ENSMUSG00000022021	1896285	-0.03	-0.55	FALSE	NONCO16958	chr14:84758445-84759083	2.5	ENSMUSG00000035566	221386	ENSMUSG00000022021	1896285	-0.03	-0.55	0.193	12	3.3	lightcyan	12.5	0.3554	EMPTY	0.83	0.14	5.84	0.05	17.02	EMPTY	FALSE	FALSE	FALSE	TRUE	FALSE	FALSE
NONCO1696	chr1:185146832-185153886	0.4	ENSMUSG00000026620	147263	ENSMUSG00000039318	50232	0.18	0.41	FALSE	NONCO1696	chr1:185146832-185153886	0.4	ENSMUSG00000026620	147263	ENSMUSG00000039318	50232	0.18	0.41	1	13	56733.6	turquoise	2.6	0.6412	EMPTY	0.11	0.14	0.76	0.19	0.55	EMPTY	FALSE	TRUE	FALSE	TRUE	FALSE	FALSE
NONCO16978	chr14:98519129-98519684	1.6	ENSMUSG00000055639	349365	ENSMUSG00000033186	514861	0.42	0.15	TRUE	NONCO16978	chr14:98519129-98519684	1.6	ENSMUSG00000055639	349365	ENSMUSG00000033186	514861	0.42	0.15	0.018	5	17.4	brown	2.9	0.0493	EMPTY	1	0.07	13.81	0.04	22.55	EMPTY	FALSE	FALSE	FALSE	FALSE	TRUE	FALSE
NONCO16983	chr14:99572728-99688686	1.2	ENSMUSG00000005148	259324	ENSMUSG00000072294	185801	-0.28	0.09	FALSE	NONCO16983	chr14:99572728-99688686	1.2	ENSMUSG00000005148	259324	ENSMUSG00000072294	185801	-0.28	0.09	1	11	4.7	lightsteelblue1	2.1	0.8213	EMPTY	0.06	0.03	2.07	0.17	0.35	EMPTY	FALSE	FALSE	FALSE	TRUE	FALSE	FALSE
NONCO16987	chr14:100212820-100246287	0.1	ENSMUSG00000072294	63057	ENSMUSG00000042888	951404	EMPTY	EMPTY	FALSE	NONCO16987	chr14:100212820-100246287	0.1	ENSMUSG00000072294	63057	ENSMUSG00000042888	951404	EMPTY	EMPTY	0.8745	22	110931	darkorange	2.9	0.1681	EMPTY	0.01	0.02	0.54	0.05	0.19	4930517O19Rik	TRUE	FALSE	FALSE	TRUE	FALSE	FALSE
NONCO16988	chr14:100285389-100293375	4.2	ENSMUSG00000072294	135626	ENSMUSG00000042888	904316	EMPTY	EMPTY	FALSE	NONCO16988	chr14:100285389-100293375	4.2	ENSMUSG00000072294	135626	ENSMUSG00000042888	904316	EMPTY	EMPTY	1	9	4.3	brown	26.3	0.7349	EMPTY	0.05	0.03	1.99	0.02	2.42	EMPTY	FALSE	FALSE	TRUE	TRUE	FALSE	FALSE
NONCO16989	chr14:100459419-100490750	0.6	ENSMUSG00000072294	309656	ENSMUSG00000042888	706941	EMPTY	EMPTY	FALSE	NONCO16989	chr14:100459419-100490750	0.6	ENSMUSG00000072294	309656	ENSMUSG00000042888	706941	EMPTY	EMPTY	0.5013	22	219437	lightsteelblue1	8.1	0.061	EMPTY	0.24	0.02	15.57	0.05	4.43	EMPTY	FALSE	FALSE	FALSE	TRUE	FALSE	FALSE
NONCO16998	chr14:103719037-103784659	4.4	ENSMUSG00000055717	14131	ENSMUSG00000022122	29967	0.42	0.17	FALSE	NONCO16998	chr14:103719037-103784659	4.4	ENSMUSG00000055717	14131	ENSMUSG00000022122	29967	0.42	0.17	1	7	2.2	salmon4	18.1	0.9182	EMPTY	0.04	0.01	2.62	0.15	0.25	EMPTY	FALSE	FALSE	FALSE	TRUE	FALSE	TRUE
NONCO17006	chr14:105589396-105632043	2.1	ENSMUSG00000053253	280099	ENSMUSG00000060143	49786	-0.53	-0.25	FALSE	NONCO17006	chr14:105589396-105632043	2.1	ENSMUSG00000053253	280099	ENSMUSG00000060143	49786	-0.53	-0.25	0.5013	22	2.9	turquoise	15	0.7486	EMPTY	0.06	0.2	0.32	0.1	0.63	EMPTY	FALSE	TRUE	FALSE	TRUE	FALSE	FALSE
NONCO17007	chr14:105621014-105631125	6.1	ENSMUSG00000053253	311717	ENSMUSG00000060143	50704	0.52	0.22	FALSE	NONCO17007	chr14:105621014-105631125	6.1	ENSMUSG00000053253	311717	ENSMUSG00000060143	50704	0.52	0.22	0.3159	0	182367	brown	4.3	0.0352	EMPTY	0.75	0.15	4.89	0.04	18.93	EMPTY	FALSE	FALSE	FALSE	TRUE	FALSE	FALSE
NONCO17012	chr14:115042769-115046754	0.1	ENSMUSG00000058126	1726057	ENSMUSG00000022112	45462	0.29	-0.1	FALSE	NONCO17012	chr14:115042769-115046754	0.1	ENSMUSG00000058126	1726057	ENSMUSG00000022112	45462	0.29	-0.1	0.5782	18	154831	thistle2	5.5	0.0857	EMPTY	0.17	0.24	0.7	0.14	1.24	Mir17hg,Mir18,Mir19a,Mir19b-1,Mir20a	TRUE	FALSE	TRUE	TRUE	FALSE	FALSE
NONCO17024	chr14:118181493-118185407	6.1	ENSMUSG00000022131	17262	ENSMUSG00000061517	47826	-0.02	0.12	FALSE	NONCO17024	chr14:118181493-118185407	6.1	ENSMUSG00000022131	17262	ENSMUSG00000061517	47826	-0.02	0.12	0.0954	12	9.8	lightcyan	27.2	0.0003	EMPTY	0.88	0.97	0.91	0.03	34.23	EMPTY	FALSE	FALSE	FALSE	TRUE	TRUE	FALSE
NONCO17038	chr14:120127889-120128590	0.4	ENSMUSG00000044819	85455	ENSMUSG00000022139	147080	-0.11	-0.57	FALSE	NONCO17038	chr14:120127889-120128590	0.4	ENSMUSG00000044819	85455	ENSMUSG00000022139	147080	-0.11	-0.57	0.8745	0	104781	turquoise	2.5	0.0274	EMPTY	0.03	0	9.01	0.23	0.12	EMPTY	FALSE	FALSE	FALSE	FALSE	FALSE	FALSE
NONCO17041	chr14:120632824-120686526	0.8	ENSMUSG00000051615	125631	ENSMUSG00000030662	224669	0.24	0.06	FALSE	NONCO17041	chr14:120632824-120686526	0.8	ENSMUSG00000051615	125631	ENSMUSG00000030662	224669	0.24	0.06	0.6291	20	106464	brown4	4.3	0.5047	EMPTY	0.19	0.07	2.93	0.23	0.82	EMPTY	FALSE	FALSE	FALSE	TRUE	FALSE	FALSE
NONCO17044	chr14:120825550-120827504	0.3	ENSMUSG00000051615	318357	ENSMUSG00000030662	83691	-0.23	-0.28	FALSE	NONCO17044	chr14:120825550-120827504	0.3	ENSMUSG00000051615	318357	ENSMUSG00000030662	83691	-0.23	-0.28	0.114	10	29.2	darkorange	5.3	0.3676	ENSG00000229269	0.3	0	150.72	0.21	1.43	EMPTY	FALSE	FALSE	FALSE	FALSE	TRUE	FALSE
NONCO17045	chr14:120847299-120849485	0.3	ENSMUSG00000051615	340106	ENSMUSG00000030662	61710	-0.47	-0.21	FALSE	NONCO17045	chr14:120847299-120849485	0.3	ENSMUSG00000051615	340106	ENSMUSG00000030662	61710	-0.47	-0.21	0.8745	15	65321.7	white	2.5	0.3303	ENSG00000229269	0	0	0.34	0.04	0.04	EMPTY	FALSE	FALSE	FALSE	TRUE	FALSE	FALSE
NONCO1705	chr1:186031092-186033940	0.4	ENSMUSG00000026614	562331	ENSMUSG00000039246	53792	-0.01	0.3	FALSE	NONCO1705	chr1:186031092-186033940	0.4	ENSMUSG00000026614	562331	ENSMUSG00000039246	53792	-0.01	0.3	1	17	77361.9	yellowgreen	3.6	0.7608	EMPTY	0	0.04	0.03	0.52	0	EMPTY	FALSE	FALSE	FALSE	FALSE	FALSE	FALSE
NONCO1706	chr1:187036167-187038327	0.5	ENSMUSG00000039224	65541	ENSMUSG00000026611	6322	0.08	0.03	FALSE	NONCO1706	chr1:187036167-187038327	0.5	ENSMUSG00000039224	65541	ENSMUSG00000026611	6322	0.08	0.03	1	11	96183.2	darkred	3.2	0.315	ENSG00000232328	0.47	0.02	23.49	0.05	9.89	EMPTY	FALSE	FALSE	FALSE	FALSE	FALSE	FALSE
NONCO17094	chr14:9410372-9529401	3	ENSMUSG00000021747	744133	ENSMUSG00000060579	20692	0.26	-0.08	FALSE	NONCO17094	chr14:9410372-9529401	3	ENSMUSG00000021747	744133	ENSMUSG00000060579	20692	0.26	-0.08	0.7666	5	11.8	brown4	6.3	0.412	EMPTY	0.39	0	214.28	0.24	1.62	EMPTY	FALSE	TRUE	FALSE	TRUE	FALSE	FALSE
NONCO17108	chr14:12867521-12867937	481.1	ENSMUSG00000054423	44443	ENSMUSG00000056296	416844	0.14	-0.28	FALSE	NONCO17108	chr14:12867521-12867937	481.1	ENSMUSG00000054423	44443	ENSMUSG00000056296	416844	0.14	-0.28	0.0954	5	4.3	midnightblue	586.8	0	EMPTY	0.85	0.57	1.51	0.05	17.75	Gm5457	FALSE	FALSE	FALSE	TRUE	TRUE	FALSE
NONCO17121	chr14:15910445-15911166	9.1	ENSMUSG00000045201	471459	ENSMUSG00000021786	327491	0.18	-0.58	FALSE	NONCO17121	chr14:15910445-15911166	9.1	ENSMUSG00000045201	471459	ENSMUSG00000021786	327491	0.18	-0.58	0.1367	17	16.1	paleturquoise	53.1	0	EMPTY	0.95	0.03	37.36	0.36	2.65	EMPTY	FALSE	FALSE	FALSE	FALSE	FALSE	FALSE
NONCO17125	chr14:16646281-16647056	0.7	ENSMUSG00000017491	70810	ENSMUSG00000021779	1013905	0.12	0.24	FALSE	NONCO17125	chr14:16646281-16647056	0.7	ENSMUSG00000017491	70810	ENSMUSG00000021779	1013905	0.12	0.24	0.0911	16	329899	darkgreen	12.8	0.0007	EMPTY	0.93	0.19	4.85	0.08	12.4	EMPTY	FALSE	FALSE	FALSE	FALSE	TRUE	FALSE
NONCO17129	chr14:17505930-17523408	0.9	ENSMUSG00000017491	930459	ENSMUSG00000021779	137553	-0.22	-0.18	FALSE	NONCO17129	chr14:17505930-17523408	0.9	ENSMUSG00000017491	930459	ENSMUSG00000021779	137553	-0.22	-0.18	1	15	134793	brown	4.2	0.2219	EMPTY	0.02	0.01	2.25	0.06	0.3	EMPTY	FALSE	FALSE	FALSE	FALSE	FALSE	FALSE
NONCO1713	chr1:189618126-189619720	1.3	ENSMUSG00000037624	215854	ENSMUSG00000026605	20887	0.02	-0.05	FALSE	NONCO1713	chr1:189618126-189619720	1.3	ENSMUSG00000037624	215854	ENSMUSG00000026605	20887	0.02	-0.05	1	13	26.4	thistle2	6.2	0.8056	EMPTY	0.76	0.15	5.01	0.11	7.21	EMPTY	FALSE	FALSE	FALSE	FALSE	FALSE	FALSE
NONCO17138	chr14:18531320-18533002	14.2	ENSMUSG00000021774	199462	ENSMUSG00000058317	40574	-0.45	-0.17	TRUE	NONCO17138	chr14:18531320-18533002	14.2	ENSMUSG00000021774	199462	ENSMUSG00000058317	40574	-0.45	-0.17	0.0149	0	2.7	turquoise	105.7	0.0001	EMPTY	0.29	0.02	12.15	0.19	1.5	Gm6781	FALSE	FALSE	FALSE	TRUE	TRUE	FALSE
NONCO17139	chr14:18557101-18566725	1.2	ENSMUSG00000021774	225243	ENSMUSG00000058317	6851	0.15	0.35	FALSE	NONCO17139	chr14:18557101-18566725	1.2	ENSMUSG00000021774	225243	ENSMUSG00000058317	6851	0.15	0.35	0.1619	4	5.1	midnightblue	14.8	0.383	EMPTY	0.25	0.02	10.41	0.04	6.54	EMPTY	FALSE	FALSE	FALSE	FALSE	FALSE	TRUE
NONCO17140	chr14:19350980-19351652	1.5	ENSMUSG00000058317	456714	ENSMUSG00000093814	50076	EMPTY	EMPTY	FALSE	NONCO17140	chr14:19350980-19351652	1.5	ENSMUSG00000058317	456714	ENSMUSG00000093814	50076	EMPTY	EMPTY	1	13	2.9	blue	2.2	0.9447	EMPTY	0.94	0.14	6.63	0.02	51.78	EMPTY	FALSE	FALSE	FALSE	FALSE	FALSE	FALSE
NONCO17161	chr14:24069735-24070915	9.5	ENSMUSG00000063142	64877	ENSMUSG00000021782	63039	0.72	0.36	FALSE	NONCO17161	chr14:24069735-24070915	9.5	ENSMUSG00000063142	64877	ENSMUSG00000021782	63039	0.72	0.36	0.193	0	2.2	turquoise	69.9	0.0083	EMPTY	0.84	0.01	70.03	0.27	3.09	Gm6158	FALSE	FALSE	FALSE	FALSE	TRUE	FALSE
NONCO17167	chr14:25257542-25441894	1.3	ENSMUSG00000025290	761397	ENSMUSG00000007817	17292	0.13	0.39	FALSE	NONCO17167	chr14:25257542-25441894	1.3	ENSMUSG00000025290	761397	ENSMUSG00000007817	17292	0.13	0.39	1	11	12.3	blue	10.9	0.1152	EMPTY	0.1	0	65.61	0.04	2.73	Gm26660	TRUE	TRUE	FALSE	TRUE	FALSE	FALSE
NONCO17183	chr14:27210337-27211706	64.8	ENSMUSG00000040717	103052	ENSMUSG00000021895	26334	0.36	-0.77	TRUE	NONCO17183	chr14:27210337-27211706	64.8	ENSMUSG00000040717	103052	ENSMUSG00000021895	26334	0.36	-0.77	0.0455	8	3	midnightblue	19.4	0.0024	ENSG00000231774	0.93	0.14	6.53	0.04	22.85	EMPTY	FALSE	FALSE	FALSE	TRUE	TRUE	FALSE
NONCO17189	chr14:27550369-27551965	0.7	ENSMUSG00000046753	41910	ENSMUSG00000040640	70478	-0.42	-0.16	FALSE	NONCO17189	chr14:27550369-27551965	0.7	ENSMUSG00000046753	41910	ENSMUSG00000040640	70478	-0.42	-0.16	0.3482	14	35433.7	midnightblue	1.7	NA	EMPTY	0.38	0.14	2.65	0.19	1.94	EMPTY	FALSE	FALSE	FALSE	FALSE	FALSE	FALSE
NONCO17198	chr14:29786834-29788045	1	ENSMUSG00000021991	64971	ENSMUSG00000042682	180264	0.04	0.3	FALSE	NONCO17198	chr14:29786834-29788045	1	ENSMUSG00000021991	64971	ENSMUSG00000042682	180264	0.04	0.3	1	11	31.9	lightyellow	5.4	NA	ENSG00000275520	0.18	0.14	1.24	0.26	0.68	EMPTY	FALSE	FALSE	FALSE	TRUE	FALSE	FALSE
NONCO172	chr1:47658497-47659295	0.6	ENSMUSG00000025986	765646	ENSMUSG00000026109	3241353	-0.23	0.76	FALSE	NONCO172	chr1:47658497-47659295	0.6	ENSMUSG00000025986	765646	ENSMUSG00000026109	3241353	-0.23	0.76	0.0954	14	71542	darkgreen	3.1	0.0965	EMPTY	1	0.04	22.77	0.19	5.15	EMPTY	FALSE	FALSE	FALSE	FALSE	FALSE	FALSE
NONCO17230	chr14:34185695-34188677	10.1	ENSMUSG00000078126	14528	ENSMUSG00000071531	5765	0.55	-0.34	TRUE	NONCO17230	chr14:34185695-34188677	10.1	ENSMUSG00000078126	14528	ENSMUSG00000071531	5765	0.55	-0.34	0.0214	5	5.7	midnightblue	42.9	0.0025	EMPTY	0	1	0	0.01	0.09	EMPTY	FALSE	FALSE	FALSE	FALSE	FALSE	FALSE
NONCO1724	chr1:191232091-191235359	0.3	ENSMUSG00000026628	14053	ENSMUSG00000037499	71431	0.31	0.07	FALSE	NONCO1724	chr1:191232091-191235359	0.3	ENSMUSG00000026628	14053	ENSMUSG00000037499	71431	0.31	0.07	1	11	106662	brown4	3.6	0.2894	EMPTY	0.24	0.01	30.9	0.1	2.56	EMPTY	FALSE	FALSE	FALSE	FALSE	FALSE	FALSE
NONCO17254	chr14:40006235-40006911	40.6	ENSMUSG00000041014	533148	ENSMUSG00000037833	806879	-0.08	-0.31	TRUE	NONCO17254	chr14:40006235-40006911	40.6	ENSMUSG00000041014	533148	ENSMUSG00000037833	806879	-0.08	-0.31	0.0102	9	17.4	midnightblue	78.5	0	EMPTY	0.78	0.14	5.47	0.14	5.56	Eif1-ps1	FALSE	FALSE	FALSE	FALSE	TRUE	FALSE
NONCO17259	chr14:43713738-43715420	5.8	ENSMUSG00000093968	36540	ENSMUSG00000091718	6834	EMPTY	EMPTY	TRUE	NONCO17259	chr14:43713738-43715420	5.8	ENSMUSG00000093968	36540	ENSMUSG00000091718	6834	EMPTY	EMPTY	0.0057	10	2.7	midnightblue	40.4	0.0136	EMPTY	0.94	0.14	6.61	0.19	4.84	EMPTY	FALSE	FALSE	FALSE	FALSE	FALSE	FALSE
NONCO1726	chr1:191453944-191494499	0.3	ENSMUSG00000026626	50673	ENSMUSG00000037474	42858	-0.55	0.41	FALSE	NONCO1726	chr1:191453944-191494499	0.3	ENSMUSG00000026626	50673	ENSMUSG00000037474	42858	-0.55	0.41	1	11	53910.6	turquoise	2.4	0.1811	ENSG00000227479	0.06	0.11	0.56	0.07	0.91	RP23-103B18.8	FALSE	FALSE	FALSE	TRUE	FALSE	FALSE
NONCO17263	chr14:44596654-44598154	0.8	ENSMUSG00000091122	8253	ENSMUSG00000079265	51051	EMPTY	EMPTY	FALSE	NONCO17263	chr14:44596654-44598154	0.8	ENSMUSG00000091122	8253	ENSMUSG00000079265	51051	EMPTY	EMPTY	0.0122	14	5.6	darkgreen	10.8	0.0757	EMPTY	0.18	0.14	1.26	0.19	0.92	Gm16439	FALSE	FALSE	FALSE	FALSE	TRUE	FALSE
NONCO17274	chr14:46859680-46860510	1.7	ENSMUSG00000055128	5488	ENSMUSG00000021838	22345	-0.38	-0.45	FALSE	NONCO17274	chr14:46859680-46860510	1.7	ENSMUSG00000055128	5488	ENSMUSG00000021838	22345	-0.38	-0.45	0.1085	18	378805	blue	14.1	0	EMPTY	EMPTY	EMPTY	EMPTY	EMPTY	EMPTY	EMPTY	FALSE	FALSE	FALSE	FALSE	FALSE	FALSE
NONCO1728	chr1:191648225-191649116	0.9	ENSMUSG00000037461	24538	ENSMUSG00000026623	68719	-0.46	-0.14	FALSE	NONCO1728	chr1:191648225-191649116	0.9	ENSMUSG00000037461	24538	ENSMUSG00000026623	68719	-0.46	-0.14	0.8278	18	296682	blue	6.4	0.057	EMPTY	EMPTY	EMPTY	EMPTY	EMPTY	EMPTY	EMPTY	FALSE	FALSE	TRUE	TRUE	FALSE	FALSE
NONCO17287	chr14:49094192-49128626	20.7	ENSMUSG00000036291	6470	ENSMUSG00000036282	43601	EMPTY	EMPTY	FALSE	NONCO17287	chr14:49094192-49128626	20.7	ENSMUSG00000036291	6470	ENSMUSG00000036282	43601	EMPTY	EMPTY	0.0548	22	3.7	turquoise	226.2	0.0027	EMPTY	0.09	0.07	1.22	0.2	0.45	EMPTY	FALSE	FALSE	FALSE	TRUE	TRUE	FALSE
NONCO17288	chr14:49139392-49143634	1.1	ENSMUSG00000036291	51670	ENSMUSG00000036282	28593	EMPTY	EMPTY	FALSE	NONCO17288	chr14:49139392-49143634	1.1	ENSMUSG00000036291	51670	ENSMUSG00000036282	28593	EMPTY	EMPTY	0.5461	20	285840	turquoise	14.7	0.0304	EMPTY	0.06	0.05	1.18	0.12	0.5	EMPTY	FALSE	FALSE	FALSE	FALSE	FALSE	FALSE
NONCO17294	chr14:50552912-50553516	6.1	ENSMUSG00000094285	18564	ENSMUSG00000053815	64646	EMPTY	EMPTY	FALSE	NONCO17294	chr14:50552912-50553516	6.1	ENSMUSG00000094285	18564	ENSMUSG00000053815	64646	EMPTY	EMPTY	0.0634	15	284887	darkgreen	6.4	0	EMPTY	0.28	0.02	11.73	0.19	1.46	EMPTY	FALSE	FALSE	FALSE	FALSE	FALSE	FALSE
NONCO17307	chr14:52538552-52540901	8.6	ENSMUSG00000059887	42858	ENSMUSG00000095643	492002	EMPTY	EMPTY	FALSE	NONCO17307	chr14:52538552-52540901	8.6	ENSMUSG00000059887	42858	ENSMUSG00000095643	492002	EMPTY	EMPTY	0.1619	20	4.1	turquoise	32.2	0.0005	EMPTY	0.99	0.14	6.98	0.34	2.92	EMPTY	FALSE	FALSE	TRUE	FALSE	FALSE	FALSE
NONCO17309	chr14:54172654-54200699	0.1	ENSMUSG00000087666	374823	ENSMUSG00000022174	34781	EMPTY	EMPTY	FALSE	NONCO17309	chr14:54172654-54200699	0.1	ENSMUSG00000087666	374823	ENSMUSG00000022174	34781	EMPTY	EMPTY	1	15	16.8	ivory	1.5	NA	EMPTY	0.51	0.14	3.57	0.15	3.43	EMPTY	FALSE	FALSE	FALSE	TRUE	FALSE	FALSE
NONCO17310	chr14:54223692-54224204	6.2	ENSMUSG00000087666	425861	ENSMUSG00000022174	11276	EMPTY	EMPTY	FALSE	NONCO17310	chr14:54223692-54224204	6.2	ENSMUSG00000087666	425861	ENSMUSG00000022174	11276	EMPTY	EMPTY	1	7	2	midnightblue	28.3	0.6427	EMPTY	0.12	0.14	0.83	0.02	4.73	EMPTY	FALSE	FALSE	FALSE	TRUE	FALSE	FALSE
NONCO1733	chr1:191960868-191962348	0.2	ENSMUSG00000037434	47622	ENSMUSG00000049353	15023	-0.28	-0.22	FALSE	NONCO1733	chr1:191960868-191962348	0.2	ENSMUSG00000037434	47622	ENSMUSG00000049353	15023	-0.28	-0.22	1	13	104408	darkorange	2.2	0.1783	ENSG00000219159	EMPTY	EMPTY	EMPTY	EMPTY	EMPTY	EMPTY	FALSE	FALSE	FALSE	FALSE	FALSE	FALSE
NONCO17357	chr14:62531508-62541609	578	ENSMUSG00000021933	75220	ENSMUSG00000035184	14129	-0.13	-0.17	FALSE	NONCO17357	chr14:62531508-62541609	578	ENSMUSG00000021933	75220	ENSMUSG00000035184	14129	-0.13	-0.17	0.2696	14	1.9	darkgreen	475.1	0.0769	EMPTY	0.53	0.04	12.68	0.06	8.27	EMPTY	FALSE	FALSE	FALSE	TRUE	TRUE	FALSE
NONCO17367	chr14:63559248-63564814	0.5	ENSMUSG00000035078	15296	ENSMUSG00000035067	41690	0.12	-0.1	FALSE	NONCO17367	chr14:63559248-63564814	0.5	ENSMUSG00000035078	15296	ENSMUSG00000035067	41690	0.12	-0.1	1	11	29	orange	2.3	0.4569	ENSG00000234019	0	0	Inf	0.03	0.1	EMPTY	FALSE	FALSE	FALSE	TRUE	FALSE	TRUE
NONCO17375	chr14:64529304-64586996	1.2	ENSMUSG00000054733	73402	ENSMUSG00000060012	65536	0.73	-0.07	FALSE	NONCO17375	chr14:64529304-64586996	1.2	ENSMUSG00000054733	73402	ENSMUSG00000060012	65536	0.73	-0.07	1	11	4.7	lightsteelblue1	19.9	0.5678	EMPTY	0.12	0	45.48	0.17	0.7	EMPTY	FALSE	FALSE	FALSE	TRUE	FALSE	FALSE
NONCO17385	chr14:65876192-65887191	1.4	ENSMUSG00000022035	9589	ENSMUSG00000034463	32205	0.24	0.1	FALSE	NONCO17385	chr14:65876192-65887191	1.4	ENSMUSG00000022035	9589	ENSMUSG00000034463	32205	0.24	0.1	0.4726	22	98789	lightyellow	4.3	0.3137	EMPTY	0.04	0.01	3.5	0.14	0.27	EMPTY	FALSE	FALSE	FALSE	TRUE	FALSE	FALSE
NONCO17393	chr14:66967095-66969398	10.4	ENSMUSG00000046204	47042	ENSMUSG00000022051	15842	-0.18	-0.59	FALSE	NONCO17393	chr14:66967095-66969398	10.4	ENSMUSG00000046204	47042	ENSMUSG00000022051	15842	-0.18	-0.59	0.7666	14	20.7	saddlebrown	3.2	0.4276	EMPTY	1	0.14	7.01	0.48	2.06	EMPTY	FALSE	FALSE	FALSE	FALSE	FALSE	FALSE
NONCO17399	chr14:68043576-68051315	1.9	ENSMUSG00000044447	110005	ENSMUSG00000022054	31276	-0.08	-0.16	FALSE	NONCO17399	chr14:68043576-68051315	1.9	ENSMUSG00000044447	110005	ENSMUSG00000022054	31276	-0.08	-0.16	1	13	4.8	brown	18.3	0.8724	EMPTY	0	0.14	0	0.06	0.01	EMPTY	FALSE	TRUE	TRUE	TRUE	FALSE	FALSE
NONCO1740	chr1:193644311-193654272	0.2	ENSMUSG00000016179	274014	ENSMUSG00000026640	963947	-0.2	0.27	FALSE	NONCO1740	chr1:193644311-193654272	0.2	ENSMUSG00000016179	274014	ENSMUSG00000026640	963947	-0.2	0.27	1	5	60784.2	darkred	2	0.6528	EMPTY	0.01	0.14	0.07	0.05	0.19	EMPTY	FALSE	FALSE	FALSE	FALSE	FALSE	FALSE
NONCO17402	chr14:68362369-68461497	0.5	ENSMUSG00000022054	237524	ENSMUSG00000022056	35840	EMPTY	EMPTY	FALSE	NONCO17402	chr14:68362369-68461497	0.5	ENSMUSG00000022054	237524	ENSMUSG00000022056	35840	EMPTY	EMPTY	0.6669	20	41583.5	darkred	1.2	NA	EMPTY	0	0.14	0.03	0.03	0.13	EMPTY	FALSE	FALSE	FALSE	TRUE	FALSE	FALSE
NONCO17406	chr14:69737707-69739020	0.5	ENSMUSG00000034190	5138	ENSMUSG00000022074	28453	-0.25	-0.41	FALSE	NONCO17406	chr14:69737707-69739020	0.5	ENSMUSG00000034190	5138	ENSMUSG00000022074	28453	-0.25	-0.41	0.8278	4	9.1	midnightblue	6.9	0.3945	EMPTY	0.25	0.14	1.75	0.01	21	EMPTY	FALSE	FALSE	FALSE	FALSE	FALSE	FALSE
NONCO17412	chr14:70360121-70361483	4.7	ENSMUSG00000022094	8697	ENSMUSG00000033644	10998	0.77	0.06	TRUE	NONCO17412	chr14:70360121-70361483	4.7	ENSMUSG00000022094	8697	ENSMUSG00000033644	10998	0.77	0.06	0.0259	2	3.6	brown	22.9	0.0479	ENSG00000225882	0.23	0.14	1.59	0.19	1.16	Gm9174	FALSE	FALSE	FALSE	FALSE	TRUE	FALSE
NONCO17421	chr14:72861675-72869865	0.6	ENSMUSG00000033487	151673	ENSMUSG00000033470	159264	0.09	-0.19	FALSE	NONCO17421	chr14:72861675-72869865	0.6	ENSMUSG00000033487	151673	ENSMUSG00000033470	159264	0.09	-0.19	1	7	107338	brown4	3.2	0.094	EMPTY	0.21	0.14	1.45	0.14	1.5	EMPTY	FALSE	FALSE	FALSE	FALSE	FALSE	FALSE
NONCO17427	chr14:73335014-73342410	2.3	ENSMUSG00000022105	9193	ENSMUSG00000022108	19822	-0.25	0.17	FALSE	NONCO17427	chr14:73335014-73342410	2.3	ENSMUSG00000022105	9193	ENSMUSG00000022108	19822	-0.25	0.17	1	11	3.3	blue	21	0.582	EMPTY	0	0.01	0.58	0.19	0.02	EMPTY	FALSE	FALSE	FALSE	FALSE	TRUE	FALSE
NONCO17437	chr14:75876707-75878377	0.2	ENSMUSG00000060126	28183	ENSMUSG00000067995	18561	0.04	-0.04	FALSE	NONCO17437	chr14:75876707-75878377	0.2	ENSMUSG00000060126	28183	ENSMUSG00000067995	18561	0.04	-0.04	1	15	34221.3	brown4	1.1	NA	ENSG00000261030	0.22	0.16	1.42	0.19	1.15	EMPTY	FALSE	FALSE	FALSE	FALSE	FALSE	FALSE
NONCO17440	chr14:76367796-76371065	1.6	ENSMUSG00000095427	130444	ENSMUSG00000022010	43897	0.23	-0.13	FALSE	NONCO17440	chr14:76367796-76371065	1.6	ENSMUSG00000095427	130444	ENSMUSG00000022010	43897	0.23	-0.13	0.1085	5	381403	brown	10.2	0.0017	EMPTY	0.01	0.14	0.05	0.04	0.17	EMPTY	FALSE	FALSE	FALSE	FALSE	FALSE	FALSE
NONCO17444	chr14:76635399-76635990	17.4	ENSMUSG00000052584	78713	ENSMUSG00000044350	388211	0.88	0.04	FALSE	NONCO17444	chr14:76635399-76635990	17.4	ENSMUSG00000052584	78713	ENSMUSG00000044350	388211	0.88	0.04	0.0661	9	3.4	brown	38.6	0.0004	EMPTY	0.21	0.68	0.31	0.03	6.21	EMPTY	FALSE	FALSE	FALSE	FALSE	FALSE	FALSE
NONCO17446	chr14:76833033-76837096	0.5	ENSMUSG00000052584	276347	ENSMUSG00000044350	187105	-0.51	0	FALSE	NONCO17446	chr14:76833033-76837096	0.5	ENSMUSG00000052584	276347	ENSMUSG00000044350	187105	-0.51	0	0.0911	22	343606	darkorange	7.9	0	EMPTY	0.26	0.01	45.14	0.07	3.68	EMPTY	FALSE	FALSE	TRUE	TRUE	FALSE	FALSE
NONCO1745	chr1:195029311-195030206	1.9	ENSMUSG00000016494	68033	ENSMUSG00000016493	11033	0.05	0.01	FALSE	NONCO1745	chr1:195029311-195030206	1.9	ENSMUSG00000016494	68033	ENSMUSG00000016493	11033	0.05	0.01	1	11	2.9	midnightblue	24.7	0.7714	EMPTY	EMPTY	EMPTY	EMPTY	EMPTY	EMPTY	EMPTY	FALSE	FALSE	FALSE	FALSE	FALSE	TRUE
NONCO17454	chr14:78559349-78562434	38	ENSMUSG00000022016	22490	ENSMUSG00000034731	7176	0.48	0.71	TRUE	NONCO17454	chr14:78559349-78562434	38	ENSMUSG00000022016	22490	ENSMUSG00000034731	7176	0.48	0.71	1	17	2.4	lightsteelblue1	764.6	0.0028	EMPTY	0.01	0.14	0.04	0.69	0.01	EMPTY	FALSE	FALSE	FALSE	TRUE	FALSE	FALSE
NONCO17457	chr14:78734127-78736298	0.2	ENSMUSG00000034731	9039	ENSMUSG00000058997	112881	0.63	-0.03	FALSE	NONCO17457	chr14:78734127-78736298	0.2	ENSMUSG00000034731	9039	ENSMUSG00000058997	112881	0.63	-0.03	0.1085	16	84991	lightsteelblue1	3.1	0.0691	EMPTY	0.1	0	95.1	0.13	0.75	EMPTY	FALSE	FALSE	FALSE	FALSE	FALSE	FALSE
NONCO1747	chr1:195017663-195018294	7.8	ENSMUSG00000016494	56385	ENSMUSG00000016493	22945	-0.1	-0.09	FALSE	NONCO1747	chr1:195017663-195018294	7.8	ENSMUSG00000016494	56385	ENSMUSG00000016493	22945	-0.1	-0.09	1	5	2.1	brown4	32.3	0.8679	EMPTY	1	0.14	7.04	0.23	4.27	RP23-445K23.6	FALSE	TRUE	FALSE	TRUE	FALSE	FALSE
NONCO17473	chr14:86265294-86299905	0.5	ENSMUSG00000035566	1728235	ENSMUSG00000022021	355463	-0.01	0.05	FALSE	NONCO17473	chr14:86265294-86299905	0.5	ENSMUSG00000035566	1728235	ENSMUSG00000022021	355463	-0.01	0.05	1	13	123237	turquoise	3.8	0.0464	EMPTY	0.02	0.01	1.58	0.04	0.6	EMPTY	FALSE	FALSE	FALSE	FALSE	FALSE	FALSE
NONCO17481	chr14:98519127-98528950	2.8	ENSMUSG00000055639	349363	ENSMUSG00000033186	505595	0.09	0.3	FALSE	NONCO17481	chr14:98519127-98528950	2.8	ENSMUSG00000055639	349363	ENSMUSG00000033186	505595	0.09	0.3	0.2287	8	18.1	midnightblue	2.1	0.2258	EMPTY	0.97	0.01	112.56	0.09	10.87	EMPTY	FALSE	FALSE	FALSE	FALSE	TRUE	FALSE
NONCO17486	chr14:99580373-99584321	0.4	ENSMUSG00000005148	266969	ENSMUSG00000072294	290166	-0.48	0.13	FALSE	NONCO17486	chr14:99580373-99584321	0.4	ENSMUSG00000005148	266969	ENSMUSG00000072294	290166	-0.48	0.13	1	19	42236.3	lightsteelblue1	1.8	NA	EMPTY	0.87	0.02	58.16	0.19	4.49	EMPTY	FALSE	FALSE	FALSE	TRUE	FALSE	FALSE
NONCO17487	chr14:99852896-99857318	0.5	ENSMUSG00000005148	539492	ENSMUSG00000072294	17169	0.27	-0.3	FALSE	NONCO17487	chr14:99852896-99857318	0.5	ENSMUSG00000005148	539492	ENSMUSG00000072294	17169	0.27	-0.3	1	7	137302	white	5.9	0.3276	EMPTY	0.15	0.01	17.78	0.03	5.13	EMPTY	FALSE	FALSE	FALSE	FALSE	FALSE	FALSE
NONCO17488	chr14:99866183-99867446	12.2	ENSMUSG00000005148	552779	ENSMUSG00000072294	7041	-0.28	0.52	FALSE	NONCO17488	chr14:99866183-99867446	12.2	ENSMUSG00000005148	552779	ENSMUSG00000072294	7041	-0.28	0.52	0.0795	20	2.4	blue	166.5	0.5593	EMPTY	0.85	0.03	26.45	0.15	5.54	EMPTY	FALSE	FALSE	FALSE	FALSE	FALSE	FALSE
NONCO17489	chr14:100473112-100482250	0.5	ENSMUSG00000072294	323349	ENSMUSG00000042888	715441	EMPTY	EMPTY	FALSE	NONCO17489	chr14:100473112-100482250	0.5	ENSMUSG00000072294	323349	ENSMUSG00000042888	715441	EMPTY	EMPTY	1	15	2.3	lightyellow	3.6	0.9957	ENSG00000236393	1	0.13	7.81	0.05	19.51	EMPTY	FALSE	FALSE	FALSE	TRUE	FALSE	FALSE
NONCO17494	chr14:102986274-103010754	0.7	ENSMUSG00000098557	3638	ENSMUSG00000022126	36224	EMPTY	EMPTY	FALSE	NONCO17494	chr14:102986274-103010754	0.7	ENSMUSG00000098557	3638	ENSMUSG00000022126	36224	EMPTY	EMPTY	0.5013	4	8	midnightblue	1.6	NA	EMPTY	1	0.05	21.58	0.01	150.07	EMPTY	FALSE	FALSE	FALSE	FALSE	TRUE	FALSE
NONCO17507	chr14:105251947-105253212	0.3	ENSMUSG00000022119	74621	ENSMUSG00000053253	5362	0.12	0.02	FALSE	NONCO17507	chr14:105251947-105253212	0.3	ENSMUSG00000022119	74621	ENSMUSG00000053253	5362	0.12	0.02	0.4726	22	61751.6	greenyellow	2.3	0.5209	ENSG00000223714	0	0.93	0	0.1	0.03	EMPTY	FALSE	FALSE	FALSE	FALSE	FALSE	FALSE
NONCO17509	chr14:105620804-105643740	10.9	ENSMUSG00000053253	311507	ENSMUSG00000060143	38089	-0.53	-0.13	FALSE	NONCO17509	chr14:105620804-105643740	10.9	ENSMUSG00000053253	311507	ENSMUSG00000060143	38089	-0.53	-0.13	0.0548	20	4.6	turquoise	242	0	EMPTY	0.59	0.31	1.9	0.01	42.27	Mir6390	FALSE	TRUE	TRUE	TRUE	FALSE	FALSE
NONCO17512	chr14:108715778-108720315	2.2	ENSMUSG00000022113	2579920	ENSMUSG00000075478	189677	EMPTY	EMPTY	FALSE	NONCO17512	chr14:108715778-108720315	2.2	ENSMUSG00000022113	2579920	ENSMUSG00000075478	189677	EMPTY	EMPTY	1	9	8	brown4	18.9	0.6963	EMPTY	0.01	0.02	0.62	0.19	0.05	EMPTY	FALSE	FALSE	FALSE	FALSE	FALSE	FALSE
NONCO17513	chr14:108750407-108752348	0.2	ENSMUSG00000022113	2614549	ENSMUSG00000075478	157644	EMPTY	EMPTY	FALSE	NONCO17513	chr14:108750407-108752348	0.2	ENSMUSG00000022113	2614549	ENSMUSG00000075478	157644	EMPTY	EMPTY	1	5	99057.1	brown4	2.7	0.4525	EMPTY	EMPTY	EMPTY	EMPTY	EMPTY	EMPTY	EMPTY	FALSE	FALSE	FALSE	FALSE	FALSE	FALSE
NONCO17514	chr14:108798492-108799449	0.7	ENSMUSG00000022113	2662634	ENSMUSG00000075478	110543	EMPTY	EMPTY	FALSE	NONCO17514	chr14:108798492-108799449	0.7	ENSMUSG00000022113	2662634	ENSMUSG00000075478	110543	EMPTY	EMPTY	1	11	134721	turquoise	7.2	0.0089	EMPTY	0.02	0.04	0.48	0.05	0.39	EMPTY	FALSE	FALSE	FALSE	FALSE	FALSE	TRUE
NONCO17540	chr14:120089883-120141692	3.1	ENSMUSG00000044819	47449	ENSMUSG00000022139	133978	0.19	-0.01	FALSE	NONCO17540	chr14:120089883-120141692	3.1	ENSMUSG00000044819	47449	ENSMUSG00000022139	133978	0.19	-0.01	1	7	1.6	brown	20.5	0.9988	EMPTY	0.52	0	114.11	0.01	89.14	EMPTY	FALSE	FALSE	FALSE	TRUE	FALSE	FALSE
NONCO17548	chr14:120768648-120798065	2.5	ENSMUSG00000051615	261455	ENSMUSG00000030662	113130	0.72	0.86	FALSE	NONCO17548	chr14:120768648-120798065	2.5	ENSMUSG00000051615	261455	ENSMUSG00000030662	113130	0.72	0.86	0.5782	1	150.2	turquoise	51.2	0	EMPTY	0.09	0.06	1.47	0.04	2.05	EMPTY	FALSE	FALSE	FALSE	FALSE	FALSE	FALSE
NONCO17575	chr15:3216996-3219744	20.3	End of chr15	3216996	ENSMUSG00000064373	48804	EMPTY	EMPTY	TRUE	NONCO17575	chr15:3216996-3219744	20.3	End of chr15	3216996	ENSMUSG00000064373	48804	EMPTY	EMPTY	0.0214	12	4.7	lightcyan	43.8	0	EMPTY	0.99	0	737.42	0.13	7.86	EMPTY	FALSE	FALSE	FALSE	TRUE	FALSE	FALSE
NONCO17583	chr15:5322244-5333962	2.7	ENSMUSG00000039942	78058	ENSMUSG00000022150	965827	0.87	-0.17	FALSE	NONCO17583	chr15:5322244-5333962	2.7	ENSMUSG00000039942	78058	ENSMUSG00000022150	965827	0.87	-0.17	1	15	15.4	blue	23.1	0.0668	EMPTY	0.08	0.14	0.59	0.11	0.78	EMPTY	FALSE	FALSE	FALSE	FALSE	FALSE	FALSE
NONCO17605	chr15:12017636-12021399	2.6	ENSMUSG00000022205	20654	ENSMUSG00000022201	96433	0.14	0.12	FALSE	NONCO17605	chr15:12017636-12021399	2.6	ENSMUSG00000022205	20654	ENSMUSG00000022201	96433	0.14	0.12	1	7	2.3	greenyellow	13.2	0.9462	EMPTY	0.08	0.04	1.94	0.04	2.09	EMPTY	FALSE	FALSE	FALSE	FALSE	FALSE	FALSE
NONCO1761	chr5:4308782-4318335	0.7	ENSMUSG00000053178	111132	ENSMUSG00000044674	435539	0.03	-0.32	FALSE	NONCO1761	chr5:4308782-4318335	0.7	ENSMUSG00000053178	111132	ENSMUSG00000044674	435539	0.03	-0.32	0.1817	21	96486.3	greenyellow	4.7	0.1942	EMPTY	EMPTY	EMPTY	EMPTY	EMPTY	EMPTY	EMPTY	FALSE	FALSE	FALSE	FALSE	FALSE	FALSE
NONCO17665	chr15:36726525-36734839	12	ENSMUSG00000022283	117553	ENSMUSG00000022285	35932	0.28	-0.21	FALSE	NONCO17665	chr15:36726525-36734839	12	ENSMUSG00000022283	117553	ENSMUSG00000022285	35932	0.28	-0.21	1	13	2.3	brown	62.5	0.7452	EMPTY	0.13	0.12	1.13	0.5	0.27	EMPTY	FALSE	FALSE	FALSE	TRUE	FALSE	FALSE
NONCO17667	chr15:36892653-36915471	5.3	ENSMUSG00000072618	12838	ENSMUSG00000062397	81561	-0.06	0.12	FALSE	NONCO17667	chr15:36892653-36915471	5.3	ENSMUSG00000072618	12838	ENSMUSG00000062397	81561	-0.06	0.12	1	9	163056	brown	3.7	0.1847	EMPTY	0.31	0.3	1.03	0.05	6.57	EMPTY	FALSE	FALSE	FALSE	TRUE	FALSE	FALSE
NONCO17668	chr15:36945205-36957799	1.2	ENSMUSG00000072618	65390	ENSMUSG00000062397	39233	-0.08	-0.48	FALSE	NONCO17668	chr15:36945205-36957799	1.2	ENSMUSG00000072618	65390	ENSMUSG00000062397	39233	-0.08	-0.48	0.1619	22	14.7	greenyellow	10	0.4473	EMPTY	0.4	0	137.44	0.18	2.22	EMPTY	FALSE	TRUE	FALSE	FALSE	FALSE	FALSE
NONCO17669	chr15:36965814-36968324	0.3	ENSMUSG00000072618	85999	ENSMUSG00000062397	28708	0.33	-0.4	FALSE	NONCO17669	chr15:36965814-36968324	0.3	ENSMUSG00000072618	85999	ENSMUSG00000062397	28708	0.33	-0.4	0.3482	20	38762.7	turquoise	1	NA	EMPTY	0.13	0	28.63	0.02	8.67	EMPTY	FALSE	FALSE	FALSE	TRUE	FALSE	FALSE
NONCO17680	chr15:38275351-38276409	1.4	ENSMUSG00000061923	48617	ENSMUSG00000037465	18005	EMPTY	EMPTY	FALSE	NONCO17680	chr15:38275351-38276409	1.4	ENSMUSG00000061923	48617	ENSMUSG00000037465	18005	EMPTY	EMPTY	0.6291	1	9.2	turquoise	8.4	0.7658	EMPTY	0.33	0	94.74	0.05	7.05	EMPTY	FALSE	FALSE	TRUE	TRUE	FALSE	FALSE
NONCO17688	chr15:38729498-38731505	0.5	ENSMUSG00000022295	37056	ENSMUSG00000022296	201638	0.15	-0.3	FALSE	NONCO17688	chr15:38729498-38731505	0.5	ENSMUSG00000022295	37056	ENSMUSG00000022296	201638	0.15	-0.3	0.1539	22	285722	turquoise	7.4	0.0054	EMPTY	0.12	0.04	3.1	0.03	4.21	EMPTY	FALSE	FALSE	FALSE	FALSE	FALSE	FALSE
NONCO17689	chr15:38990156-38992689	0.3	ENSMUSG00000022296	40752	ENSMUSG00000022297	13592	0.37	-0.27	FALSE	NONCO17689	chr15:38990156-38992689	0.3	ENSMUSG00000022296	40752	ENSMUSG00000022297	13592	0.37	-0.27	0.5461	12	19.1	lightsteelblue1	3.4	0.6331	EMPTY	0.57	0.07	8.21	0.42	1.35	EMPTY	FALSE	FALSE	FALSE	FALSE	TRUE	FALSE
NONCO1770	chr5:5781500-5783665	1565.1	ENSMUSG00000015652	32175	ENSMUSG00000092094	985366	-0.35	0.14	TRUE	NONCO1770	chr5:5781500-5783665	1565.1	ENSMUSG00000015652	32175	ENSMUSG00000092094	985366	-0.35	0.14	0.031	20	6	paleturquoise	7391.7	0	ENSG00000267316	0.8	0	563.3	0.19	4.13	Gm15459,Gm26825	TRUE	FALSE	TRUE	TRUE	TRUE	FALSE
NONCO17702	chr15:42030383-42032182	3.7	ENSMUSG00000042895	160664	ENSMUSG00000022309	392546	EMPTY	EMPTY	FALSE	NONCO17702	chr15:42030383-42032182	3.7	ENSMUSG00000042895	160664	ENSMUSG00000022309	392546	EMPTY	EMPTY	0.6669	22	2.2	brown	44.6	0.7274	EMPTY	0.98	0.02	43.58	0.19	5.08	EMPTY	FALSE	FALSE	FALSE	TRUE	FALSE	FALSE
NONCO17706	chr15:44281872-44284189	1.1	ENSMUSG00000038760	45961	ENSMUSG00000038736	91039	0.52	0.3	FALSE	NONCO17706	chr15:44281872-44284189	1.1	ENSMUSG00000038760	45961	ENSMUSG00000038736	91039	0.52	0.3	0.114	2	5.6	brown	6.2	0.3138	EMPTY	0.82	0.05	16.08	0.04	23.04	EMPTY	FALSE	FALSE	FALSE	FALSE	TRUE	FALSE
NONCO17708	chr15:44888338-44907449	0.7	ENSMUSG00000022340	100276	ENSMUSG00000022342	198836	-0.2	-0.37	FALSE	NONCO17708	chr15:44888338-44907449	0.7	ENSMUSG00000022340	100276	ENSMUSG00000022342	198836	-0.2	-0.37	0.129	6	93832.7	midnightblue	4.9	0.0753	EMPTY	EMPTY	EMPTY	EMPTY	EMPTY	EMPTY	EMPTY	FALSE	FALSE	FALSE	FALSE	FALSE	FALSE
NONCO17709	chr15:44971709-44972129	0.4	ENSMUSG00000022340	183647	ENSMUSG00000022342	134156	-0.49	-0.18	FALSE	NONCO17709	chr15:44971709-44972129	0.4	ENSMUSG00000022340	183647	ENSMUSG00000022342	134156	-0.49	-0.18	0.0259	8	29737.8	midnightblue	0.8	NA	EMPTY	1	0	460.44	0.21	4.74	Gm5471	FALSE	FALSE	FALSE	FALSE	TRUE	FALSE
NONCO17716	chr15:48889199-48889556	0.4	ENSMUSG00000022311	97137	ENSMUSG00000038679	1765197	-0.55	-0.57	FALSE	NONCO17716	chr15:48889199-48889556	0.4	ENSMUSG00000022311	97137	ENSMUSG00000038679	1765197	-0.55	-0.57	0.114	10	5.7	lightcyan	4.9	0.5365	EMPTY	0.93	0	234.2	0.03	28.82	EMPTY	FALSE	FALSE	FALSE	FALSE	FALSE	FALSE
NONCO17717	chr15:49171361-49181038	0	ENSMUSG00000022311	379299	ENSMUSG00000038679	1473715	0.12	0.62	FALSE	NONCO17717	chr15:49171361-49181038	0	ENSMUSG00000022311	379299	ENSMUSG00000038679	1473715	0.12	0.62	0.0911	22	35847.1	turquoise	1.1	NA	EMPTY	0.02	0	36.76	0.08	0.26	EMPTY	FALSE	FALSE	FALSE	FALSE	FALSE	FALSE
NONCO17733	chr15:54952948-54964642	0.2	ENSMUSG00000022425	32803	ENSMUSG00000037343	50488	0.44	-0.23	FALSE	NONCO17733	chr15:54952948-54964642	0.2	ENSMUSG00000022425	32803	ENSMUSG00000037343	50488	0.44	-0.23	1	13	129278	brown4	4.9	0.4778	EMPTY	0.04	0	14.99	0.11	0.42	Gm26684	TRUE	FALSE	FALSE	TRUE	FALSE	FALSE
NONCO17749	chr15:60468056-60469828	0.6	ENSMUSG00000071749	451439	ENSMUSG00000072568	349167	EMPTY	EMPTY	FALSE	NONCO17749	chr15:60468056-60469828	0.6	ENSMUSG00000071749	451439	ENSMUSG00000072568	349167	EMPTY	EMPTY	0.0911	8	10.4	midnightblue	4.4	0.0847	EMPTY	0.94	0.02	44.95	0.07	12.75	EMPTY	FALSE	FALSE	FALSE	TRUE	FALSE	FALSE
NONCO17751	chr15:62037985-62378096	5.6	ENSMUSG00000022346	47612	ENSMUSG00000079025	1397873	EMPTY	EMPTY	TRUE	NONCO17751	chr15:62037985-62378096	5.6	ENSMUSG00000022346	47612	ENSMUSG00000079025	1397873	EMPTY	EMPTY	0.0377	18	3.4	lightsteelblue1	104.7	0.012	EMPTY	0.06	0	22.34	0.01	5.24	Gm27718,Gm27913,Gm27957,Pvt1	TRUE	FALSE	FALSE	TRUE	FALSE	FALSE
NONCO17753	chr15:63587123-63632874	6.8	ENSMUSG00000022346	1596750	ENSMUSG00000079025	143095	EMPTY	EMPTY	TRUE	NONCO17753	chr15:63587123-63632874	6.8	ENSMUSG00000022346	1596750	ENSMUSG00000079025	143095	EMPTY	EMPTY	0.0214	6	132.9	brown	8.5	0	EMPTY	0.97	0.08	12.09	0.17	5.64	EMPTY	FALSE	FALSE	FALSE	FALSE	FALSE	FALSE
NONCO17755	chr15:64069361-64070410	0.2	ENSMUSG00000022378	8914	ENSMUSG00000022377	16448	0.17	-0.17	FALSE	NONCO17755	chr15:64069361-64070410	0.2	ENSMUSG00000022378	8914	ENSMUSG00000022377	16448	0.17	-0.17	1	9	13.4	lightyellow	2.7	0.9132	EMPTY	0.01	0.06	0.09	0.22	0.03	EMPTY	FALSE	FALSE	FALSE	FALSE	FALSE	TRUE
NONCO17775	chr15:68324595-68326408	0.9	ENSMUSG00000022335	65740	ENSMUSG00000022332	602013	0.22	0.7	FALSE	NONCO17775	chr15:68324595-68326408	0.9	ENSMUSG00000022335	65740	ENSMUSG00000022332	602013	0.22	0.7	0.7225	6	14.2	brown	3.2	0.5136	ENSG00000215162	0.1	0.02	5.92	0.08	1.2	EMPTY	FALSE	FALSE	FALSE	FALSE	FALSE	FALSE
NONCO17777	chr15:68714913-68721362	73.4	ENSMUSG00000022335	456058	ENSMUSG00000022332	207059	-0.46	-0.52	FALSE	NONCO17777	chr15:68714913-68721362	73.4	ENSMUSG00000022335	456058	ENSMUSG00000022332	207059	-0.46	-0.52	0.193	2	1.5	salmon4	295.8	0.7347	EMPTY	0	0	0.8	0.04	0.08	EMPTY	FALSE	FALSE	FALSE	FALSE	TRUE	FALSE
NONCO17780	chr15:69498901-69506195	1.9	ENSMUSG00000022332	405390	ENSMUSG00000036800	1939484	-0.01	-0.14	FALSE	NONCO17780	chr15:69498901-69506195	1.9	ENSMUSG00000022332	405390	ENSMUSG00000036800	1939484	-0.01	-0.14	0.2287	18	514709	blue	13.2	0.0378	EMPTY	0.03	0	27.97	0.06	0.52	EMPTY	FALSE	FALSE	FALSE	FALSE	FALSE	TRUE
NONCO17781	chr15:70062752-70064254	33.3	ENSMUSG00000022332	969241	ENSMUSG00000036800	1381425	-0.77	0.46	FALSE	NONCO17781	chr15:70062752-70064254	33.3	ENSMUSG00000022332	969241	ENSMUSG00000036800	1381425	-0.77	0.46	0.0661	20	9.7	paleturquoise	41.4	0	EMPTY	0.9	0.01	122.42	0.04	20.36	EMPTY	FALSE	FALSE	FALSE	FALSE	FALSE	FALSE
NONCO17782	chr15:71310839-71311915	0.3	ENSMUSG00000022332	2217328	ENSMUSG00000036800	133764	-0.29	0.29	FALSE	NONCO17782	chr15:71310839-71311915	0.3	ENSMUSG00000022332	2217328	ENSMUSG00000036800	133764	-0.29	0.29	1	13	9079.6	turquoise	0.5	NA	EMPTY	0.04	0.14	0.27	0.01	7.01	EMPTY	FALSE	FALSE	FALSE	FALSE	FALSE	FALSE
NONCO17798	chr15:74079994-74081552	15.8	ENSMUSG00000086361	240087	ENSMUSG00000034730	434644	EMPTY	EMPTY	TRUE	NONCO17798	chr15:74079994-74081552	15.8	ENSMUSG00000086361	240087	ENSMUSG00000034730	434644	EMPTY	EMPTY	0.0102	10	25.4	lightcyan	125.4	0	ENSG00000231774	0.95	0.09	11.15	0.31	3.1	Gm7935	FALSE	FALSE	FALSE	TRUE	TRUE	FALSE
NONCO17799	chr15:74496422-74496893	1.1	ENSMUSG00000086361	656515	ENSMUSG00000034730	19303	EMPTY	EMPTY	FALSE	NONCO17799	chr15:74496422-74496893	1.1	ENSMUSG00000086361	656515	ENSMUSG00000034730	19303	EMPTY	EMPTY	0.7225	0	4.5	turquoise	5.3	0.8974	ENSG00000231774	0.04	0	10.64	0	15.54	EMPTY	FALSE	FALSE	FALSE	FALSE	FALSE	FALSE
NONCO1780	chr5:9043269-9043811	0.4	ENSMUSG00000003623	45946	ENSMUSG00000079659	56927	EMPTY	EMPTY	FALSE	NONCO1780	chr5:9043269-9043811	0.4	ENSMUSG00000003623	45946	ENSMUSG00000079659	56927	EMPTY	EMPTY	1	17	52923.2	lightyellow	2.1	0.4814	EMPTY	0.03	0.43	0.06	0.08	0.34	EMPTY	FALSE	FALSE	FALSE	FALSE	FALSE	FALSE
NONCO17805	chr15:75085493-75086628	8.2	ENSMUSG00000079018	36664	ENSMUSG00000022584	21531	-0.25	0.41	FALSE	NONCO17805	chr15:75085493-75086628	8.2	ENSMUSG00000079018	36664	ENSMUSG00000022584	21531	-0.25	0.41	0.0634	18	1.28699e+06	orange	25	0	EMPTY	EMPTY	EMPTY	EMPTY	EMPTY	EMPTY	EMPTY	FALSE	FALSE	FALSE	FALSE	FALSE	FALSE
NONCO17808	chr15:75633958-75640415	3	ENSMUSG00000047003	8659	ENSMUSG00000000934	16621	0.04	-0.31	FALSE	NONCO17808	chr15:75633958-75640415	3	ENSMUSG00000047003	8659	ENSMUSG00000000934	16621	0.04	-0.31	1	13	7.7	turquoise	31.2	0.3822	ENSG00000275520	0.12	0	73.37	0.15	0.8	EMPTY	FALSE	FALSE	TRUE	TRUE	FALSE	FALSE
NONCO17809	chr15:75642032-75651605	18.5	ENSMUSG00000047003	16733	ENSMUSG00000000934	5431	-0.11	0.61	FALSE	NONCO17809	chr15:75642032-75651605	18.5	ENSMUSG00000047003	16733	ENSMUSG00000000934	5431	-0.11	0.61	0.9921	8	2.1	midnightblue	207.5	0.7759	ENSG00000275520	0.09	0.01	7.07	0.26	0.33	2810039B14Rik	FALSE	TRUE	FALSE	TRUE	FALSE	FALSE
NONCO17821	chr15:76361425-76363852	0.6	ENSMUSG00000022553	7046	ENSMUSG00000022554	5047	0.38	-0.15	FALSE	NONCO17821	chr15:76361425-76363852	0.6	ENSMUSG00000022553	7046	ENSMUSG00000022554	5047	0.38	-0.15	1	15	8	greenyellow	4.3	0.7657	EMPTY	0.28	0.6	0.47	0.19	1.44	EMPTY	FALSE	FALSE	FALSE	FALSE	FALSE	FALSE
NONCO17849	chr15:79010895-79014586	1.9	ENSMUSG00000033088	5029	ENSMUSG00000096210	13627	0.21	0.09	FALSE	NONCO17849	chr15:79010895-79014586	1.9	ENSMUSG00000033088	5029	ENSMUSG00000096210	13627	0.21	0.09	1	7	3.7	brown	20.2	0.6577	EMPTY	0.01	0.02	0.7	0.21	0.06	EMPTY	FALSE	FALSE	FALSE	TRUE	FALSE	FALSE
NONCO17869	chr15:79847037-79851775	0.4	ENSMUSG00000089715	12350	ENSMUSG00000009585	39885	0.08	-0.08	FALSE	NONCO17869	chr15:79847037-79851775	0.4	ENSMUSG00000089715	12350	ENSMUSG00000009585	39885	0.08	-0.08	1	13	11.9	lightyellow	1.6	NA	EMPTY	0.28	0.01	49.1	0.08	3.46	EMPTY	FALSE	FALSE	FALSE	FALSE	FALSE	TRUE
NONCO17882	chr15:81579339-81579845	0.6	ENSMUSG00000091198	79792	ENSMUSG00000055024	5507	-0.29	-0.31	FALSE	NONCO17882	chr15:81579339-81579845	0.6	ENSMUSG00000091198	79792	ENSMUSG00000055024	5507	-0.29	-0.31	1	11	9.4	white	2.2	0.9682	EMPTY	0.12	0	45.57	0.07	1.84	EMPTY	FALSE	FALSE	FALSE	FALSE	FALSE	FALSE
NONCO1789	chr5:14428386-14436521	2.4	ENSMUSG00000063531	171698	ENSMUSG00000061601	78398	-0.12	-0.17	FALSE	NONCO1789	chr5:14428386-14436521	2.4	ENSMUSG00000063531	171698	ENSMUSG00000061601	78398	-0.12	-0.17	1	20	27236.7	turquoise	1.3	NA	EMPTY	EMPTY	EMPTY	EMPTY	EMPTY	EMPTY	EMPTY	FALSE	FALSE	FALSE	FALSE	FALSE	FALSE
NONCO17906	chr15:82982433-82991526	6.6	ENSMUSG00000041852	70300	ENSMUSG00000058099	6196	-0.02	-0.52	FALSE	NONCO17906	chr15:82982433-82991526	6.6	ENSMUSG00000041852	70300	ENSMUSG00000058099	6196	-0.02	-0.52	0.1367	6	2.5	greenyellow	101.7	0.1367	EMPTY	0.05	0.05	0.99	0.05	1	AW121686,Gm29019	TRUE	FALSE	TRUE	TRUE	FALSE	FALSE
NONCO17934	chr15:85634836-85638951	2.1	ENSMUSG00000022382	53016	ENSMUSG00000022383	96033	-0.04	-0.27	FALSE	NONCO17934	chr15:85634836-85638951	2.1	ENSMUSG00000022382	53016	ENSMUSG00000022383	96033	-0.04	-0.27	1	10	2.2	brown	46.3	0.9349	EMPTY	0.1	0.03	3.44	0.08	1.22	EMPTY	FALSE	FALSE	FALSE	TRUE	FALSE	FALSE
NONCO17935	chr15:85646271-85707499	2.9	ENSMUSG00000022382	64451	ENSMUSG00000022383	27485	0.06	-0.43	FALSE	NONCO17935	chr15:85646271-85707499	2.9	ENSMUSG00000022382	64451	ENSMUSG00000022383	27485	0.06	-0.43	1	15	4.5	brown	21.2	0.6804	ENSG00000260802	0.15	0.86	0.17	0.03	4.55	EMPTY	FALSE	TRUE	FALSE	TRUE	FALSE	FALSE
NONCO17936	chr15:85684768-85687828	0.7	ENSMUSG00000022382	102948	ENSMUSG00000022383	47156	0.51	-0.09	FALSE	NONCO17936	chr15:85684768-85687828	0.7	ENSMUSG00000022382	102948	ENSMUSG00000022383	47156	0.51	-0.09	0.4325	13	40.9	brown4	10.7	0.0225	ENSG00000260802	0.1	0.19	0.5	0.01	9.06	EMPTY	FALSE	FALSE	FALSE	FALSE	FALSE	FALSE
NONCO17944	chr15:86708147-86724052	0.3	ENSMUSG00000051864	209645	ENSMUSG00000054863	901179	0.45	-0.45	FALSE	NONCO17944	chr15:86708147-86724052	0.3	ENSMUSG00000051864	209645	ENSMUSG00000054863	901179	0.45	-0.45	0.4325	20	57013.4	orange	2.8	0.2831	EMPTY	0.03	0.05	0.58	0.17	0.17	EMPTY	FALSE	FALSE	FALSE	FALSE	FALSE	FALSE
NONCO17945	chr15:86817198-86860780	1.5	ENSMUSG00000051864	318696	ENSMUSG00000054863	764451	-0.14	0.05	FALSE	NONCO17945	chr15:86817198-86860780	1.5	ENSMUSG00000051864	318696	ENSMUSG00000054863	764451	-0.14	0.05	0.9417	1	8.5	lightyellow	11.9	0.8335	EMPTY	0.17	0.39	0.43	0.12	1.44	EMPTY	FALSE	FALSE	FALSE	FALSE	FALSE	FALSE
NONCO17957	chr15:89211704-89246332	2.5	ENSMUSG00000015377	15231	ENSMUSG00000036561	6704	EMPTY	EMPTY	FALSE	NONCO17957	chr15:89211704-89246332	2.5	ENSMUSG00000015377	15231	ENSMUSG00000036561	6704	EMPTY	EMPTY	1	13	2.5	darkgreen	15.4	0.4523	EMPTY	0.17	0.14	1.18	0.22	0.75	EMPTY	FALSE	FALSE	FALSE	TRUE	FALSE	FALSE
NONCO17964	chr15:89766390-89769010	84.5	ENSMUSG00000022621	174468	ENSMUSG00000063260	13384	0.64	-0.6	FALSE	NONCO17964	chr15:89766390-89769010	84.5	ENSMUSG00000022621	174468	ENSMUSG00000063260	13384	0.64	-0.6	0.0795	21	11.7	turquoise	1845.7	0	EMPTY	0.22	0.14	1.55	0.19	1.13	EMPTY	FALSE	FALSE	FALSE	FALSE	TRUE	FALSE
NONCO17986	chr15:92920606-92939296	25.9	ENSMUSG00000036218	148788	ENSMUSG00000036197	300447	0.47	0.4	FALSE	NONCO17986	chr15:92920606-92939296	25.9	ENSMUSG00000036218	148788	ENSMUSG00000036197	300447	0.47	0.4	1	9	13.1	midnightblue	7.7	0.0569	EMPTY	0.22	1	0.22	0.01	23.63	EMPTY	FALSE	FALSE	FALSE	FALSE	FALSE	TRUE
NONCO17987	chr15:93001515-93009212	0.8	ENSMUSG00000036218	229697	ENSMUSG00000036197	230531	-0.15	-0.08	FALSE	NONCO17987	chr15:93001515-93009212	0.8	ENSMUSG00000036218	229697	ENSMUSG00000036197	230531	-0.15	-0.08	1	20	4.4	lightsteelblue1	5.3	0.885	EMPTY	0.01	0.07	0.12	0.07	0.14	EMPTY	FALSE	TRUE	FALSE	TRUE	FALSE	FALSE
NONCO17994	chr15:93825048-93933156	1.8	ENSMUSG00000036158	229158	ENSMUSG00000022449	337008	-0.14	0.1	FALSE	NONCO17994	chr15:93825048-93933156	1.8	ENSMUSG00000036158	229158	ENSMUSG00000022449	337008	-0.14	0.1	0.3482	20	6.8	turquoise	18.1	0.055	EMPTY	0.12	0.06	2.22	0.03	4.07	EMPTY	FALSE	TRUE	FALSE	TRUE	FALSE	FALSE
NONCO17997	chr15:94465444-94477167	0.5	ENSMUSG00000022449	27	ENSMUSG00000033356	45522	-0.1	0.26	FALSE	NONCO17997	chr15:94465444-94477167	0.5	ENSMUSG00000022449	27	ENSMUSG00000033356	45522	-0.1	0.26	0.9417	10	67694.6	brown4	2.1	0.2003	EMPTY	0.12	0.05	2.42	0.16	0.71	EMPTY	FALSE	FALSE	FALSE	TRUE	FALSE	FALSE
NONCO180	chr1:52367310-52391326	0.4	ENSMUSG00000026103	134079	ENSMUSG00000002881	65969	0.48	-0.34	FALSE	NONCO180	chr1:52367310-52391326	0.4	ENSMUSG00000026103	134079	ENSMUSG00000002881	65969	0.48	-0.34	0.4073	20	39082.6	turquoise	1.4	NA	EMPTY	0.08	0.03	2.25	0.22	0.36	EMPTY	FALSE	FALSE	FALSE	FALSE	FALSE	FALSE
NONCO18002	chr15:95666118-95669450	1.5	ENSMUSG00000045608	10159	ENSMUSG00000097643	118407	-0.23	-0.17	FALSE	NONCO18002	chr15:95666118-95669450	1.5	ENSMUSG00000045608	10159	ENSMUSG00000097643	118407	-0.23	-0.17	1	13	1.9	turquoise	15.2	0.9476	EMPTY	0.17	0.08	2.05	0.19	0.88	EMPTY	FALSE	FALSE	FALSE	FALSE	FALSE	FALSE
NONCO18007	chr15:96255437-96256959	1.4	ENSMUSG00000064210	279974	ENSMUSG00000033237	30560	-0.43	-0.22	FALSE	NONCO18007	chr15:96255437-96256959	1.4	ENSMUSG00000064210	279974	ENSMUSG00000033237	30560	-0.43	-0.22	0.9921	4	408342	brown	10.5	NA	EMPTY	0.34	0.09	3.89	0.12	2.9	EMPTY	FALSE	FALSE	FALSE	FALSE	FALSE	FALSE
NONCO18008	chr15:96275016-96277363	3.9	ENSMUSG00000064210	299553	ENSMUSG00000033237	10156	-0.23	0.01	FALSE	NONCO18008	chr15:96275016-96277363	3.9	ENSMUSG00000064210	299553	ENSMUSG00000033237	10156	-0.23	0.01	1	7	7.3	brown	54.5	0.265	EMPTY	0.03	0.19	0.17	0.12	0.27	EMPTY	FALSE	FALSE	FALSE	TRUE	FALSE	FALSE
NONCO18036	chr15:98966891-98975086	2.5	ENSMUSG00000072235	13341	ENSMUSG00000064081	30971	0.52	-0.29	FALSE	NONCO18036	chr15:98966891-98975086	2.5	ENSMUSG00000072235	13341	ENSMUSG00000064081	30971	0.52	-0.29	0.7225	0	7.3	turquoise	20.6	0.3608	ENSG00000261030	0.03	0.08	0.39	0.27	0.12	EMPTY	FALSE	FALSE	FALSE	FALSE	FALSE	FALSE
NONCO18037	chr15:98983409-98990035	4.8	ENSMUSG00000072235	29859	ENSMUSG00000064081	16022	0.12	0.11	FALSE	NONCO18037	chr15:98983409-98990035	4.8	ENSMUSG00000072235	29859	ENSMUSG00000064081	16022	0.12	0.11	1	9	3.7	salmon4	90.3	0.0427	ENSG00000261030	EMPTY	EMPTY	EMPTY	EMPTY	EMPTY	4930578M01Rik	FALSE	FALSE	FALSE	TRUE	FALSE	FALSE
NONCO18054	chr15:100443398-100451878	2.2	ENSMUSG00000087444	15249	ENSMUSG00000037353	17157	0.03	-0.26	FALSE	NONCO18054	chr15:100443398-100451878	2.2	ENSMUSG00000087444	15249	ENSMUSG00000037353	17157	0.03	-0.26	1	5	4.3	lightyellow	15.4	0.9073	EMPTY	0.12	0.97	0.12	0.14	0.85	EMPTY	FALSE	FALSE	FALSE	FALSE	FALSE	FALSE
NONCO18071	chr15:101254327-101259519	0.8	ENSMUSG00000000531	21573	ENSMUSG00000023034	7328	0.34	0.08	FALSE	NONCO18071	chr15:101254327-101259519	0.8	ENSMUSG00000000531	21573	ENSMUSG00000023034	7328	0.34	0.08	1	11	6.9	midnightblue	6.7	0.8295	EMPTY	0	0	Inf	0.28	0.01	EMPTY	FALSE	TRUE	FALSE	TRUE	FALSE	TRUE
NONCO18075	chr15:102194295-102196868	0.9	ENSMUSG00000023044	5253	ENSMUSG00000046897	6781	-0.04	0.67	FALSE	NONCO18075	chr15:102194295-102196868	0.9	ENSMUSG00000023044	5253	ENSMUSG00000046897	6781	-0.04	0.67	0.2156	2	30.6	darkmagenta	17.3	0.0207	EMPTY	0.08	0.37	0.21	0.1	0.77	EMPTY	FALSE	FALSE	FALSE	TRUE	FALSE	FALSE
NONCO18085	chr15:102776345-102819539	6.6	ENSMUSG00000023055	54168	ENSMUSG00000001655	101565	EMPTY	EMPTY	FALSE	NONCO18085	chr15:102776345-102819539	6.6	ENSMUSG00000023055	54168	ENSMUSG00000001655	101565	EMPTY	EMPTY	0.7666	6	6.7	brown	9	0.1326	EMPTY	0.94	0.1	9.63	0.65	1.45	EMPTY	FALSE	FALSE	FALSE	TRUE	FALSE	FALSE
NONCO18095	chr15:103586732-103587108	0.2	ENSMUSG00000022491	21655	ENSMUSG00000036925	308752	EMPTY	EMPTY	FALSE	NONCO18095	chr15:103586732-103587108	0.2	ENSMUSG00000022491	21655	ENSMUSG00000036925	308752	EMPTY	EMPTY	1	15	12.3	darkgreen	1.5	NA	EMPTY	0.98	0.02	45.24	0.15	6.54	EMPTY	FALSE	FALSE	FALSE	FALSE	FALSE	FALSE
NONCO18096	chr15:103616802-103619265	516.4	ENSMUSG00000022491	51725	ENSMUSG00000036925	276595	EMPTY	EMPTY	TRUE	NONCO18096	chr15:103616802-103619265	516.4	ENSMUSG00000022491	51725	ENSMUSG00000036925	276595	EMPTY	EMPTY	0.6669	17	3	lightsteelblue1	377.5	0	EMPTY	0.41	0.02	18.91	0.19	2.11	EMPTY	FALSE	FALSE	FALSE	FALSE	FALSE	FALSE
NONCO18109	chr15:5464198-5464905	3.5	ENSMUSG00000039942	220012	ENSMUSG00000022150	834884	0.05	-0.66	FALSE	NONCO18109	chr15:5464198-5464905	3.5	ENSMUSG00000039942	220012	ENSMUSG00000022150	834884	0.05	-0.66	0.114	13	3.7	midnightblue	20.5	0.0037	ENSG00000279978	0.9	0.14	6.35	0.19	4.65	EMPTY	FALSE	FALSE	FALSE	FALSE	TRUE	FALSE
NONCO18129	chr15:9231497-9232738	1.4	ENSMUSG00000039704	33180	ENSMUSG00000072664	40582	EMPTY	EMPTY	FALSE	NONCO18129	chr15:9231497-9232738	1.4	ENSMUSG00000039704	33180	ENSMUSG00000072664	40582	EMPTY	EMPTY	0.4325	12	3.9	midnightblue	8	0.473	EMPTY	0.96	0.14	6.74	0.17	5.7	EMPTY	FALSE	FALSE	FALSE	TRUE	FALSE	FALSE
NONCO18153	chr15:20422066-20450116	0.1	ENSMUSG00000022321	1407831	ENSMUSG00000047565	215104	0.23	-0.28	FALSE	NONCO18153	chr15:20422066-20450116	0.1	ENSMUSG00000022321	1407831	ENSMUSG00000047565	215104	0.23	-0.28	1	11	2.2	darkred	10.8	0.9731	EMPTY	0	0.14	0.01	0.04	0.05	EMPTY	FALSE	FALSE	FALSE	FALSE	FALSE	FALSE
NONCO18154	chr15:20553988-20656231	0.5	ENSMUSG00000022321	1539753	ENSMUSG00000047565	8989	-0.01	-0.17	FALSE	NONCO18154	chr15:20553988-20656231	0.5	ENSMUSG00000022321	1539753	ENSMUSG00000047565	8989	-0.01	-0.17	1	9	7	brown	5.2	0.9623	EMPTY	EMPTY	EMPTY	EMPTY	EMPTY	EMPTY	EMPTY	FALSE	FALSE	FALSE	FALSE	FALSE	FALSE
NONCO18156	chr15:21596269-21598144	1.3	ENSMUSG00000040452	6737	ENSMUSG00000040420	950879	0.36	-0.15	FALSE	NONCO18156	chr15:21596269-21598144	1.3	ENSMUSG00000040452	6737	ENSMUSG00000040420	950879	0.36	-0.15	1	9	2.5	turquoise	17.2	0.8464	EMPTY	0.02	0.14	0.14	0.03	0.63	EMPTY	FALSE	FALSE	FALSE	FALSE	FALSE	FALSE
NONCO18160	chr15:23489869-23490827	17.7	ENSMUSG00000040420	15452	ENSMUSG00000051237	1646704	-0.15	-0.34	FALSE	NONCO18160	chr15:23489869-23490827	17.7	ENSMUSG00000040420	15452	ENSMUSG00000051237	1646704	-0.15	-0.34	0.1367	13	5.1	midnightblue	25.2	0.0011	EMPTY	0.94	0.14	6.59	0.04	21.33	EMPTY	FALSE	FALSE	FALSE	TRUE	TRUE	FALSE
NONCO18161	chr15:24981360-25027591	2	ENSMUSG00000040420	1506943	ENSMUSG00000051237	109940	0.58	-0.2	FALSE	NONCO18161	chr15:24981360-25027591	2	ENSMUSG00000040420	1506943	ENSMUSG00000051237	109940	0.58	-0.2	0.2696	20	3.1	turquoise	40.7	0.7498	ENSG00000224173	0.69	0.14	4.85	0.05	13.75	Gm2824	TRUE	TRUE	FALSE	TRUE	FALSE	TRUE
NONCO18162	chr15:24999518-25001020	0.9	ENSMUSG00000040420	1525101	ENSMUSG00000051237	136511	-0.14	-0.07	FALSE	NONCO18162	chr15:24999518-25001020	0.9	ENSMUSG00000040420	1525101	ENSMUSG00000051237	136511	-0.14	-0.07	0.9921	6	8.9	brown	5.6	0.583	EMPTY	0.11	0.14	0.8	0.02	6.28	EMPTY	FALSE	FALSE	FALSE	FALSE	FALSE	FALSE
NONCO18163	chr15:25102008-25117894	0.5	ENSMUSG00000040420	1627591	ENSMUSG00000051237	19637	0.38	0.11	FALSE	NONCO18163	chr15:25102008-25117894	0.5	ENSMUSG00000040420	1627591	ENSMUSG00000051237	19637	0.38	0.11	0.5013	22	86786.4	turquoise	3	0.7448	ENSG00000236780	0	0.14	0.02	0.11	0.03	EMPTY	FALSE	FALSE	FALSE	FALSE	FALSE	FALSE
NONCO18164	chr15:25430951-25434098	5.8	ENSMUSG00000056089	16108	ENSMUSG00000022272	188428	-0.25	-0.07	TRUE	NONCO18164	chr15:25430951-25434098	5.8	ENSMUSG00000056089	16108	ENSMUSG00000022272	188428	-0.25	-0.07	0.031	4	3.3	midnightblue	131.9	0	EMPTY	0.14	0.69	0.2	0.44	0.32	EMPTY	FALSE	FALSE	FALSE	TRUE	FALSE	FALSE
NONCO18180	chr15:28045858-28051646	1.2	ENSMUSG00000022263	20011	ENSMUSG00000022262	152107	EMPTY	EMPTY	FALSE	NONCO18180	chr15:28045858-28051646	1.2	ENSMUSG00000022263	20011	ENSMUSG00000022262	152107	EMPTY	EMPTY	1	7	12.1	greenyellow	4.3	0.7021	EMPTY	0.41	0.14	2.92	0.06	6.59	EMPTY	FALSE	FALSE	FALSE	TRUE	FALSE	FALSE
NONCO18181	chr15:28058506-28071826	13	ENSMUSG00000022263	32659	ENSMUSG00000022262	131927	EMPTY	EMPTY	TRUE	NONCO18181	chr15:28058506-28071826	13	ENSMUSG00000022263	32659	ENSMUSG00000022262	131927	EMPTY	EMPTY	0.0455	10	8.2	midnightblue	26.2	0	ENSG00000223863	0.17	0.14	1.16	0.17	0.96	EMPTY	FALSE	FALSE	FALSE	TRUE	TRUE	FALSE
NONCO18182	chr15:29015063-29015785	0.3	ENSMUSG00000022262	543019	ENSMUSG00000022240	1156809	EMPTY	EMPTY	FALSE	NONCO18182	chr15:29015063-29015785	0.3	ENSMUSG00000022262	543019	ENSMUSG00000022240	1156809	EMPTY	EMPTY	0.0911	6	30197.7	midnightblue	1.2	NA	ENSG00000223863	0.03	0.14	0.2	0.19	0.14	EMPTY	FALSE	FALSE	FALSE	FALSE	FALSE	FALSE
NONCO1819	chr5:22724025-22726322	311.1	ENSMUSG00000029012	173597	ENSMUSG00000029004	708120	EMPTY	EMPTY	TRUE	NONCO1819	chr5:22724025-22726322	311.1	ENSMUSG00000029012	173597	ENSMUSG00000029004	708120	EMPTY	EMPTY	0.0259	21	6.9	turquoise	5465.5	0	EMPTY	0.86	0	260.97	0.19	4.44	EMPTY	FALSE	FALSE	FALSE	TRUE	TRUE	FALSE
NONCO18193	chr15:31401673-31418288	0.3	ENSMUSG00000022237	33915	ENSMUSG00000022236	22923	0.28	-0.1	FALSE	NONCO18193	chr15:31401673-31418288	0.3	ENSMUSG00000022237	33915	ENSMUSG00000022236	22923	0.28	-0.1	1	13	15.1	lightsteelblue1	3.2	0.8672	ENSG00000228541	0.02	0.14	0.15	0.13	0.16	EMPTY	FALSE	FALSE	FALSE	TRUE	FALSE	FALSE
NONCO18196	chr15:31629179-31629648	0.1	ENSMUSG00000039065	7953	ENSMUSG00000045267	547641	EMPTY	EMPTY	FALSE	NONCO18196	chr15:31629179-31629648	0.1	ENSMUSG00000039065	7953	ENSMUSG00000045267	547641	EMPTY	EMPTY	0.4073	22	113752	turquoise	4.7	0.0674	ENSG00000228541	0.04	0.19	0.19	0.06	0.59	EMPTY	FALSE	FALSE	FALSE	FALSE	FALSE	FALSE
NONCO18201	chr15:32777778-32796006	66.1	ENSMUSG00000022231	81438	ENSMUSG00000022261	124718	0.14	0.78	TRUE	NONCO18201	chr15:32777778-32796006	66.1	ENSMUSG00000022231	81438	ENSMUSG00000022261	124718	0.14	0.78	0.0027	0	3.5	turquoise	420.4	0	EMPTY	EMPTY	EMPTY	EMPTY	EMPTY	EMPTY	EMPTY	FALSE	TRUE	FALSE	FALSE	FALSE	TRUE
NONCO18202	chr15:32791592-32793462	0.5	ENSMUSG00000022231	95252	ENSMUSG00000022261	127262	0.04	0.15	FALSE	NONCO18202	chr15:32791592-32793462	0.5	ENSMUSG00000022231	95252	ENSMUSG00000022261	127262	0.04	0.15	1	9	23.2	greenyellow	3.8	0.685	EMPTY	0.54	0.04	15.03	0.19	2.77	EMPTY	FALSE	FALSE	FALSE	FALSE	FALSE	FALSE
NONCO1821	chr5:22755162-22761961	0.3	ENSMUSG00000029012	204734	ENSMUSG00000029004	672481	EMPTY	EMPTY	FALSE	NONCO1821	chr5:22755162-22761961	0.3	ENSMUSG00000029012	204734	ENSMUSG00000029004	672481	EMPTY	EMPTY	1	5	34.4	blue	4.9	0.4303	EMPTY	0.11	0	25.83	0.03	3.76	EMPTY	FALSE	FALSE	FALSE	FALSE	FALSE	FALSE
NONCO18221	chr15:36370166-36382859	0.4	ENSMUSG00000068579	61211	ENSMUSG00000048307	94810	-0.07	0.18	FALSE	NONCO18221	chr15:36370166-36382859	0.4	ENSMUSG00000068579	61211	ENSMUSG00000048307	94810	-0.07	0.18	1	13	33278.7	lightsteelblue1	1.5	NA	EMPTY	0.18	0.01	12.95	0.03	6.63	EMPTY	FALSE	FALSE	FALSE	FALSE	FALSE	FALSE
NONCO18222	chr15:36629515-36695757	10.3	ENSMUSG00000022283	20543	ENSMUSG00000022285	75014	-0.2	0.23	FALSE	NONCO18222	chr15:36629515-36695757	10.3	ENSMUSG00000022283	20543	ENSMUSG00000022285	75014	-0.2	0.23	1	17	2.4	brown4	35.1	0.9079	EMPTY	0	0.09	0.05	0.21	0.02	EMPTY	FALSE	FALSE	FALSE	TRUE	TRUE	FALSE
NONCO18223	chr15:36717924-36730983	0.5	ENSMUSG00000022283	108952	ENSMUSG00000022285	39788	-0.27	-0.15	FALSE	NONCO18223	chr15:36717924-36730983	0.5	ENSMUSG00000022283	108952	ENSMUSG00000022285	39788	-0.27	-0.15	0.7225	13	48419.4	darkgreen	1.4	NA	EMPTY	0.02	0	5.64	0.19	0.1	EMPTY	FALSE	FALSE	FALSE	TRUE	FALSE	FALSE
NONCO18225	chr15:36948238-36980890	2.4	ENSMUSG00000072618	68423	ENSMUSG00000062397	16142	-0.04	0.05	FALSE	NONCO18225	chr15:36948238-36980890	2.4	ENSMUSG00000072618	68423	ENSMUSG00000062397	16142	-0.04	0.05	0.2979	22	11.5	orange	10	0.2853	EMPTY	0	0	0.15	0.02	0.04	EMPTY	FALSE	TRUE	FALSE	TRUE	FALSE	FALSE
NONCO18229	chr15:37131961-37134213	0.7	ENSMUSG00000062397	124560	ENSMUSG00000022286	98824	0.2	-0.07	FALSE	NONCO18229	chr15:37131961-37134213	0.7	ENSMUSG00000062397	124560	ENSMUSG00000022286	98824	0.2	-0.07	0.9921	21	19.5	blue	10.3	0.1335	EMPTY	0.03	0	28.74	0.02	1.91	EMPTY	FALSE	FALSE	FALSE	FALSE	FALSE	FALSE
NONCO1823	chr5:23102168-23275631	81.5	ENSMUSG00000029012	551740	ENSMUSG00000029004	158811	EMPTY	EMPTY	TRUE	NONCO1823	chr5:23102168-23275631	81.5	ENSMUSG00000029012	551740	ENSMUSG00000029004	158811	EMPTY	EMPTY	0.0038	4	1.9	midnightblue	697.3	0.0001	EMPTY	0.6	1	0.6	0.22	2.7	EMPTY	FALSE	FALSE	FALSE	TRUE	FALSE	FALSE
NONCO18234	chr15:38108107-38128064	0.3	ENSMUSG00000037487	29255	ENSMUSG00000061923	91140	EMPTY	EMPTY	FALSE	NONCO18234	chr15:38108107-38128064	0.3	ENSMUSG00000037487	29255	ENSMUSG00000061923	91140	EMPTY	EMPTY	1	9	69.8	brown	5	0.535	EMPTY	0.11	0	55	0.21	0.52	EMPTY	FALSE	FALSE	FALSE	FALSE	FALSE	TRUE
NONCO18235	chr15:38184025-38199522	2.2	ENSMUSG00000037487	105173	ENSMUSG00000061923	19682	EMPTY	EMPTY	FALSE	NONCO18235	chr15:38184025-38199522	2.2	ENSMUSG00000037487	105173	ENSMUSG00000061923	19682	EMPTY	EMPTY	0.9417	20	51	blue	9.9	0.5157	EMPTY	0.27	0.35	0.77	0.06	4.59	EMPTY	FALSE	FALSE	FALSE	FALSE	FALSE	FALSE
NONCO18240	chr15:38885697-38886396	0.3	ENSMUSG00000022295	193255	ENSMUSG00000022296	46747	-0.35	-0.26	FALSE	NONCO18240	chr15:38885697-38886396	0.3	ENSMUSG00000022295	193255	ENSMUSG00000022296	46747	-0.35	-0.26	1	13	72062.1	darkred	2.9	0.5651	ENSG00000272180	0.1	0.04	2.71	0.05	2.12	EMPTY	FALSE	FALSE	FALSE	FALSE	FALSE	FALSE
NONCO18241	chr15:38895018-38895931	0.2	ENSMUSG00000022295	202576	ENSMUSG00000022296	37212	0.39	-0.24	FALSE	NONCO18241	chr15:38895018-38895931	0.2	ENSMUSG00000022295	202576	ENSMUSG00000022296	37212	0.39	-0.24	0.5461	16	92533.1	darkgreen	2.8	0.2156	EMPTY	0.01	0.06	0.2	0.18	0.06	EMPTY	FALSE	FALSE	FALSE	FALSE	FALSE	FALSE
NONCO18255	chr15:40340171-40431056	1.3	ENSMUSG00000094112	191483	ENSMUSG00000022306	223987	EMPTY	EMPTY	FALSE	NONCO18255	chr15:40340171-40431056	1.3	ENSMUSG00000094112	191483	ENSMUSG00000022306	223987	EMPTY	EMPTY	1	5	94795.3	salmon4	3.9	0.1542	EMPTY	0.01	0.02	0.26	0.14	0.04	EMPTY	FALSE	FALSE	FALSE	FALSE	FALSE	FALSE
NONCO18270	chr15:43808859-43853873	0.9	ENSMUSG00000022337	281083	ENSMUSG00000054409	12823	0.34	0.46	FALSE	NONCO18270	chr15:43808859-43853873	0.9	ENSMUSG00000022337	281083	ENSMUSG00000054409	12823	0.34	0.46	1	20	98932.6	turquoise	3.8	0.124	ENSG00000253968	EMPTY	EMPTY	EMPTY	EMPTY	EMPTY	EMPTY	FALSE	FALSE	FALSE	FALSE	TRUE	FALSE
NONCO18271	chr15:44281868-44284097	5.4	ENSMUSG00000038760	45957	ENSMUSG00000038736	91131	0.07	0.39	FALSE	NONCO18271	chr15:44281868-44284097	5.4	ENSMUSG00000038760	45957	ENSMUSG00000038736	91131	0.07	0.39	0.2696	18	12.9	lightsteelblue1	2.9	0.349	ENSG00000253968	0.92	0.05	18.18	0.03	31.09	EMPTY	FALSE	FALSE	FALSE	FALSE	TRUE	FALSE
NONCO18274	chr15:44822113-44836963	0.4	ENSMUSG00000022340	34051	ENSMUSG00000022342	269322	0.06	-0.04	FALSE	NONCO18274	chr15:44822113-44836963	0.4	ENSMUSG00000022340	34051	ENSMUSG00000022342	269322	0.06	-0.04	1	13	4.5	turquoise	3.2	0.9811	EMPTY	0.01	0.01	1.31	0.07	0.18	EMPTY	FALSE	TRUE	FALSE	TRUE	FALSE	FALSE
NONCO18280	chr15:51105538-51172521	1.1	ENSMUSG00000038679	215076	ENSMUSG00000022312	614038	-0.01	0.18	FALSE	NONCO18280	chr15:51105538-51172521	1.1	ENSMUSG00000038679	215076	ENSMUSG00000022312	614038	-0.01	0.18	0.8278	2	231391	blue	5	0.0542	EMPTY	0.2	0.01	25.56	0.13	1.55	EMPTY	FALSE	FALSE	FALSE	FALSE	FALSE	FALSE
NONCO18281	chr15:51490480-51629680	2.6	ENSMUSG00000038679	600018	ENSMUSG00000022312	156879	-0.08	0.22	FALSE	NONCO18281	chr15:51490480-51629680	2.6	ENSMUSG00000038679	600018	ENSMUSG00000022312	156879	-0.08	0.22	0.2979	16	142913	blue	3.8	0.2021	EMPTY	0.64	0.02	37.29	0.63	1.02	EMPTY	FALSE	FALSE	FALSE	FALSE	FALSE	TRUE
NONCO18305	chr15:59210896-59211523	6.5	ENSMUSG00000022353	128871	ENSMUSG00000022351	103555	-0.65	0.47	FALSE	NONCO18305	chr15:59210896-59211523	6.5	ENSMUSG00000022353	128871	ENSMUSG00000022351	103555	-0.65	0.47	0.1619	18	3.5	saddlebrown	9.5	0.4712	EMPTY	0.96	0.01	108.46	0	202.89	Gm5045	FALSE	FALSE	FALSE	FALSE	TRUE	FALSE
NONCO18306	chr15:59244215-59307589	23.7	ENSMUSG00000022353	162190	ENSMUSG00000022351	7489	-0.44	0.86	FALSE	NONCO18306	chr15:59244215-59307589	23.7	ENSMUSG00000022353	162190	ENSMUSG00000022351	7489	-0.44	0.86	0.3159	13	20.5	saddlebrown	42.8	0	EMPTY	0.13	0.22	0.59	0.62	0.21	EMPTY	FALSE	FALSE	FALSE	FALSE	FALSE	FALSE
NONCO18308	chr15:60468183-60469611	2.7	ENSMUSG00000071749	451566	ENSMUSG00000072568	349384	EMPTY	EMPTY	FALSE	NONCO18308	chr15:60468183-60469611	2.7	ENSMUSG00000071749	451566	ENSMUSG00000072568	349384	EMPTY	EMPTY	1	9	3.2	greenyellow	6.4	0.5215	EMPTY	0.98	0.02	47.01	0.07	13.94	EMPTY	FALSE	FALSE	FALSE	FALSE	FALSE	FALSE
NONCO18314	chr15:62258423-62260364	0.6	ENSMUSG00000022346	268050	ENSMUSG00000079025	1515605	EMPTY	EMPTY	FALSE	NONCO18314	chr15:62258423-62260364	0.6	ENSMUSG00000022346	268050	ENSMUSG00000079025	1515605	EMPTY	EMPTY	0.1817	20	26955.8	lightsteelblue1	1	NA	EMPTY	0.05	0.06	0.78	0.01	4.53	Pvt1	FALSE	FALSE	FALSE	FALSE	FALSE	FALSE
NONCO18315	chr15:62980644-62982065	25.8	ENSMUSG00000022346	990271	ENSMUSG00000079025	793904	EMPTY	EMPTY	FALSE	NONCO18315	chr15:62980644-62982065	25.8	ENSMUSG00000022346	990271	ENSMUSG00000079025	793904	EMPTY	EMPTY	0.0954	10	2.1	lightcyan	566.1	0.0004	EMPTY	0.91	0.01	156.88	0.16	5.76	EMPTY	FALSE	FALSE	TRUE	TRUE	TRUE	FALSE
NONCO1832	chr5:23850597-23861476	3.4	ENSMUSG00000028998	6437	ENSMUSG00000028995	53801	0.23	0.61	FALSE	NONCO1832	chr5:23850597-23861476	3.4	ENSMUSG00000028998	6437	ENSMUSG00000028995	53801	0.23	0.61	0.9921	1	3.3	brown	38.2	0.6346	ENSG00000234199	0.04	0.35	0.11	0.09	0.44	2700038G22Rik	TRUE	FALSE	TRUE	TRUE	FALSE	FALSE
NONCO18323	chr15:67127491-67176836	6.1	ENSMUSG00000013846	13500	ENSMUSG00000022335	906931	0.44	0.09	TRUE	NONCO18323	chr15:67127491-67176836	6.1	ENSMUSG00000013846	13500	ENSMUSG00000022335	906931	0.44	0.09	0.0259	4	7.2	brown	34.5	0.0038	EMPTY	0	0.01	0.37	0.02	0.23	EMPTY	FALSE	FALSE	FALSE	TRUE	FALSE	FALSE
NONCO18324	chr15:68324595-68326408	0.5	ENSMUSG00000022335	65740	ENSMUSG00000022332	602013	0.16	0.48	FALSE	NONCO18324	chr15:68324595-68326408	0.5	ENSMUSG00000022335	65740	ENSMUSG00000022332	602013	0.16	0.48	1	5	7.3	brown	1.7	NA	EMPTY	0.1	0.02	5.93	0.08	1.2	EMPTY	FALSE	FALSE	FALSE	FALSE	FALSE	FALSE
NONCO18325	chr15:68334715-68337690	0.2	ENSMUSG00000022335	75860	ENSMUSG00000022332	590731	0.31	-0.13	FALSE	NONCO18325	chr15:68334715-68337690	0.2	ENSMUSG00000022335	75860	ENSMUSG00000022332	590731	0.31	-0.13	0.1817	16	134028	darkgreen	3.7	0.0752	EMPTY	0.06	0.03	2.48	0.07	0.93	Gm26621	TRUE	FALSE	FALSE	TRUE	FALSE	TRUE
NONCO18328	chr15:68714912-68715770	1.4	ENSMUSG00000022335	456057	ENSMUSG00000022332	212651	-0.27	0.36	FALSE	NONCO18328	chr15:68714912-68715770	1.4	ENSMUSG00000022335	456057	ENSMUSG00000022332	212651	-0.27	0.36	0.031	12	2.7	lightcyan	6.4	0.6204	EMPTY	0.6	0.04	15.43	0.06	10.45	EMPTY	FALSE	FALSE	FALSE	FALSE	TRUE	FALSE
NONCO18329	chr15:68876746-68877436	8.3	ENSMUSG00000022335	617891	ENSMUSG00000022332	50985	0.03	-0.02	FALSE	NONCO18329	chr15:68876746-68877436	8.3	ENSMUSG00000022335	617891	ENSMUSG00000022332	50985	0.03	-0.02	0.0661	14	23.6	saddlebrown	3.3	0.1461	EMPTY	0.02	0.08	0.31	0.01	4.2	Gm7125	FALSE	FALSE	FALSE	FALSE	FALSE	FALSE
NONCO18347	chr15:74078447-74204399	0.6	ENSMUSG00000086361	238540	ENSMUSG00000034730	311797	EMPTY	EMPTY	FALSE	NONCO18347	chr15:74078447-74204399	0.6	ENSMUSG00000086361	238540	ENSMUSG00000034730	311797	EMPTY	EMPTY	0.053	22	72309.5	turquoise	2.6	0.0502	ENSG00000253673	0.06	0	21.23	0.02	3.41	EMPTY	FALSE	TRUE	FALSE	TRUE	FALSE	FALSE
NONCO18348	chr15:74232803-74487728	4.4	ENSMUSG00000086361	392896	ENSMUSG00000034730	28468	EMPTY	EMPTY	FALSE	NONCO18348	chr15:74232803-74487728	4.4	ENSMUSG00000086361	392896	ENSMUSG00000034730	28468	EMPTY	EMPTY	1	11	2.8	brown	26.9	0.6575	EMPTY	0.22	0.37	0.59	0.03	7.5	EMPTY	FALSE	TRUE	FALSE	TRUE	FALSE	TRUE
NONCO1836	chr5:24215326-24222137	0.4	ENSMUSG00000048439	31314	ENSMUSG00000038319	97453	-0.3	-0.45	FALSE	NONCO1836	chr5:24215326-24222137	0.4	ENSMUSG00000048439	31314	ENSMUSG00000038319	97453	-0.3	-0.45	0.3159	22	8.6	turquoise	12.4	0.4642	ENSG00000234199	EMPTY	EMPTY	EMPTY	EMPTY	EMPTY	EMPTY	FALSE	FALSE	FALSE	FALSE	FALSE	TRUE
NONCO18383	chr15:77361097-77366155	1.4	ENSMUSG00000033565	54045	ENSMUSG00000010601	22067	0.1	-0.07	FALSE	NONCO18383	chr15:77361097-77366155	1.4	ENSMUSG00000033565	54045	ENSMUSG00000010601	22067	0.1	-0.07	1	7	20.2	greenyellow	7.5	0.1386	ENSG00000253163	0.05	0.01	8.19	0.05	0.95	EMPTY	FALSE	FALSE	FALSE	FALSE	FALSE	FALSE
NONCO18393	chr15:78862956-78869106	0.1	ENSMUSG00000043501	7428	ENSMUSG00000033128	8085	-0.35	0.37	FALSE	NONCO18393	chr15:78862956-78869106	0.1	ENSMUSG00000043501	7428	ENSMUSG00000033128	8085	-0.35	0.37	1	4	74490.9	midnightblue	2.6	0.3614	EMPTY	0.12	0.2	0.59	0.06	2.05	Gm26634	TRUE	FALSE	TRUE	TRUE	FALSE	FALSE
NONCO18465	chr15:83258867-83259859	0.2	ENSMUSG00000047878	7094	ENSMUSG00000054277	39882	0.64	0.31	FALSE	NONCO18465	chr15:83258867-83259859	0.2	ENSMUSG00000047878	7094	ENSMUSG00000054277	39882	0.64	0.31	0.5782	0	33.2	darkorange	3.6	0.7574	ENSG00000229703	0.18	0.01	25.92	0.36	0.49	EMPTY	FALSE	FALSE	FALSE	FALSE	FALSE	FALSE
NONCO18466	chr15:83355700-83367309	1.1	ENSMUSG00000054277	5454	ENSMUSG00000016664	8299	0.67	0.35	FALSE	NONCO18466	chr15:83355700-83367309	1.1	ENSMUSG00000054277	5454	ENSMUSG00000016664	8299	0.67	0.35	0.3159	21	163.1	turquoise	29.6	0.0267	EMPTY	0.45	0.03	17.67	0.22	2.02	1700001L05Rik	TRUE	FALSE	FALSE	TRUE	FALSE	FALSE
NONCO18483	chr15:85609135-85615130	0.6	ENSMUSG00000022382	27315	ENSMUSG00000022383	119854	-0.21	0.52	FALSE	NONCO18483	chr15:85609135-85615130	0.6	ENSMUSG00000022382	27315	ENSMUSG00000022383	119854	-0.21	0.52	1	17	66.8	ivory	20	0.2853	EMPTY	0.01	0	7.42	0.02	0.47	EMPTY	FALSE	FALSE	FALSE	TRUE	FALSE	FALSE
NONCO18484	chr15:85669642-85670494	1.2	ENSMUSG00000022382	87822	ENSMUSG00000022383	64490	0.32	-0.55	FALSE	NONCO18484	chr15:85669642-85670494	1.2	ENSMUSG00000022382	87822	ENSMUSG00000022383	64490	0.32	-0.55	1	5	433264	violet	13.4	0.0017	EMPTY	0.15	0.19	0.79	0.2	0.75	EMPTY	FALSE	FALSE	FALSE	TRUE	FALSE	FALSE
NONCO18485	chr15:85675959-85681768	2.4	ENSMUSG00000022382	94139	ENSMUSG00000022383	53216	-0.26	0.12	FALSE	NONCO18485	chr15:85675959-85681768	2.4	ENSMUSG00000022382	94139	ENSMUSG00000022383	53216	-0.26	0.12	0.0954	18	10.7	paleturquoise	22.7	0.0133	EMPTY	0.31	0.19	1.64	0	98.91	EMPTY	FALSE	TRUE	TRUE	TRUE	FALSE	FALSE
NONCO18495	chr15:87342284-87349733	1.1	ENSMUSG00000051864	843782	ENSMUSG00000054863	275498	-0.36	-0.01	FALSE	NONCO18495	chr15:87342284-87349733	1.1	ENSMUSG00000051864	843782	ENSMUSG00000054863	275498	-0.36	-0.01	1	18	413791	blue	11.1	0.2015	EMPTY	0.19	0	256.45	0.01	34.48	EMPTY	FALSE	FALSE	FALSE	FALSE	FALSE	FALSE
NONCO18512	chr15:89211559-89215012	0.7	ENSMUSG00000015377	15086	ENSMUSG00000036561	38024	EMPTY	EMPTY	FALSE	NONCO18512	chr15:89211559-89215012	0.7	ENSMUSG00000015377	15086	ENSMUSG00000036561	38024	EMPTY	EMPTY	1	5	2.9	brown	24	0.7258	EMPTY	0.11	0	62.07	0.37	0.28	Gm26798	TRUE	FALSE	TRUE	TRUE	FALSE	FALSE
NONCO18519	chr15:89695395-89776700	2.9	ENSMUSG00000022621	103473	ENSMUSG00000063260	5694	-0.23	-0.24	FALSE	NONCO18519	chr15:89695395-89776700	2.9	ENSMUSG00000022621	103473	ENSMUSG00000063260	5694	-0.23	-0.24	0.3159	5	4.4	brown	47.2	0.012	EMPTY	0.02	0.14	0.17	0.28	0.09	EMPTY	FALSE	FALSE	FALSE	FALSE	TRUE	FALSE
NONCO18528	chr15:90878463-90883909	38.6	ENSMUSG00000052560	199032	ENSMUSG00000022629	49368	0.11	-0.51	FALSE	NONCO18528	chr15:90878463-90883909	38.6	ENSMUSG00000052560	199032	ENSMUSG00000022629	49368	0.11	-0.51	0.0548	9	4.2	midnightblue	207.8	0	EMPTY	0.8	0.16	4.94	0.19	4.13	Tcea1-ps1	FALSE	FALSE	FALSE	TRUE	TRUE	FALSE
NONCO18536	chr15:92365526-92366917	5.3	ENSMUSG00000055022	23560	ENSMUSG00000036218	29999	-0.19	0.02	FALSE	NONCO18536	chr15:92365526-92366917	5.3	ENSMUSG00000055022	23560	ENSMUSG00000036218	29999	-0.19	0.02	1	17	2.9	orange	70.7	0.8255	EMPTY	0.13	0.04	3.22	0.07	1.98	EMPTY	FALSE	TRUE	FALSE	TRUE	FALSE	FALSE
NONCO18552	chr15:95183630-95185717	0.9	ENSMUSG00000063296	87534	ENSMUSG00000022454	33735	0.08	0.08	FALSE	NONCO18552	chr15:95183630-95185717	0.9	ENSMUSG00000063296	87534	ENSMUSG00000022454	33735	0.08	0.08	0.3708	1	63732.9	salmon4	3	0.4027	EMPTY	0.01	0.02	0.27	0.05	0.11	EMPTY	FALSE	FALSE	FALSE	TRUE	FALSE	FALSE
NONCO18555	chr15:95689100-95772676	0.6	ENSMUSG00000045608	33141	ENSMUSG00000097643	15181	-0.61	-0.15	FALSE	NONCO18555	chr15:95689100-95772676	0.6	ENSMUSG00000045608	33141	ENSMUSG00000097643	15181	-0.61	-0.15	0.5013	20	63227.2	lightsteelblue1	2.2	0.2144	EMPTY	0.13	0.16	0.8	0.12	1.09	EMPTY	FALSE	FALSE	FALSE	TRUE	FALSE	FALSE
NONCO18561	chr15:96136305-96264050	2.9	ENSMUSG00000064210	160842	ENSMUSG00000033237	23469	0.08	-0.16	FALSE	NONCO18561	chr15:96136305-96264050	2.9	ENSMUSG00000064210	160842	ENSMUSG00000033237	23469	0.08	-0.16	0.3708	2	4.9	greenyellow	17.9	0.1511	EMPTY	0.15	0.04	3.47	0.1	1.56	EMPTY	FALSE	FALSE	FALSE	FALSE	FALSE	FALSE
NONCO18562	chr15:96271616-96273275	4.7	ENSMUSG00000064210	296153	ENSMUSG00000033237	14244	0.26	-0.32	FALSE	NONCO18562	chr15:96271616-96273275	4.7	ENSMUSG00000064210	296153	ENSMUSG00000033237	14244	0.26	-0.32	0.4325	0	2.7	darkorange	72.2	0.6891	EMPTY	0.16	0.15	1.02	0.19	0.82	EMPTY	FALSE	FALSE	FALSE	FALSE	FALSE	FALSE
NONCO18566	chr15:97602009-97606982	0.3	ENSMUSG00000044250	216321	ENSMUSG00000022466	68124	-0.25	-0.01	FALSE	NONCO18566	chr15:97602009-97606982	0.3	ENSMUSG00000044250	216321	ENSMUSG00000022466	68124	-0.25	-0.01	1	7	14.4	lightyellow	1.9	NA	EMPTY	0.19	0	40.82	0.06	3.43	EMPTY	FALSE	FALSE	FALSE	TRUE	FALSE	FALSE
NONCO18578	chr15:98983111-98984116	0.7	ENSMUSG00000072235	29561	ENSMUSG00000064081	21941	0.67	-0.27	FALSE	NONCO18578	chr15:98983111-98984116	0.7	ENSMUSG00000072235	29561	ENSMUSG00000064081	21941	0.67	-0.27	1	11	109988	darkred	4.6	0.1075	EMPTY	0.32	0.23	1.41	0.05	6.1	EMPTY	FALSE	FALSE	FALSE	TRUE	FALSE	FALSE
NONCO18624	chr15:101255297-101259759	6.2	ENSMUSG00000000531	22543	ENSMUSG00000023034	7088	-0.17	-0.15	FALSE	NONCO18624	chr15:101255297-101259759	6.2	ENSMUSG00000000531	22543	ENSMUSG00000023034	7088	-0.17	-0.15	0.6669	4	7.4	midnightblue	21	0.0003	EMPTY	EMPTY	EMPTY	EMPTY	EMPTY	EMPTY	EMPTY	FALSE	FALSE	FALSE	FALSE	FALSE	FALSE
NONCO18629	chr15:101962849-101984465	1.3	ENSMUSG00000050463	8563	ENSMUSG00000049382	12247	EMPTY	EMPTY	FALSE	NONCO18629	chr15:101962849-101984465	1.3	ENSMUSG00000050463	8563	ENSMUSG00000049382	12247	EMPTY	EMPTY	0.5782	20	48094.9	turquoise	2.4	0.5665	EMPTY	0.01	0	Inf	0.23	0.05	EMPTY	FALSE	FALSE	FALSE	FALSE	FALSE	FALSE
NONCO18651	chr16:3114405-3114753	0.9	End of chr16	3114405	ENSMUSG00000051003	477646	EMPTY	EMPTY	FALSE	NONCO18651	chr16:3114405-3114753	0.9	End of chr16	3114405	ENSMUSG00000051003	477646	EMPTY	EMPTY	0.6291	18	166227	orange	3.5	0.0004	EMPTY	EMPTY	EMPTY	EMPTY	EMPTY	EMPTY	EMPTY	FALSE	FALSE	FALSE	FALSE	FALSE	FALSE
NONCO18674	chr16:5306839-5450068	3	ENSMUSG00000022544	50857	ENSMUSG00000008658	1359155	0.24	-0.29	FALSE	NONCO18674	chr16:5306839-5450068	3	ENSMUSG00000022544	50857	ENSMUSG00000008658	1359155	0.24	-0.29	0.6669	18	180133	violet	7	0.0869	ENSG00000276995	0.1	0.01	7.4	0.08	1.16	EMPTY	FALSE	TRUE	FALSE	TRUE	FALSE	TRUE
NONCO18675	chr16:6075759-6636651	71.8	ENSMUSG00000022544	819777	ENSMUSG00000008658	172572	-0.36	0.9	TRUE	NONCO18675	chr16:6075759-6636651	71.8	ENSMUSG00000022544	819777	ENSMUSG00000008658	172572	-0.36	0.9	0.3708	16	5.4	lightsteelblue1	65	0	EMPTY	0.24	0.01	30.24	0.01	16.52	EMPTY	FALSE	TRUE	FALSE	TRUE	FALSE	FALSE
NONCO18676	chr16:6270679-6271362	4.8	ENSMUSG00000022544	1014697	ENSMUSG00000008658	537861	-0.09	-0.31	FALSE	NONCO18676	chr16:6270679-6271362	4.8	ENSMUSG00000022544	1014697	ENSMUSG00000008658	537861	-0.09	-0.31	1	5	25.8	brown	21.1	0.0872	EMPTY	EMPTY	EMPTY	EMPTY	EMPTY	EMPTY	EMPTY	FALSE	FALSE	FALSE	TRUE	FALSE	FALSE
NONCO18686	chr16:9004306-9007837	1	ENSMUSG00000022507	145391	ENSMUSG00000059003	569874	0.06	0.04	FALSE	NONCO18686	chr16:9004306-9007837	1	ENSMUSG00000022507	145391	ENSMUSG00000059003	569874	0.06	0.04	1	7	30.5	lightsteelblue1	10.8	0.2354	EMPTY	0	0.01	0.41	0.11	0.02	EMPTY	FALSE	TRUE	FALSE	FALSE	FALSE	FALSE
NONCO18687	chr16:9107290-9107660	4.7	ENSMUSG00000022507	248375	ENSMUSG00000059003	470051	-0.61	0.57	FALSE	NONCO18687	chr16:9107290-9107660	4.7	ENSMUSG00000022507	248375	ENSMUSG00000059003	470051	-0.61	0.57	0.018	14	11.2	darkgreen	2.8	0.2253	EMPTY	1	0.02	64.68	0.07	14.66	EMPTY	FALSE	FALSE	FALSE	FALSE	FALSE	FALSE
NONCO18688	chr16:9281037-9292762	0.8	ENSMUSG00000022507	422122	ENSMUSG00000059003	284949	0.24	-0.19	FALSE	NONCO18688	chr16:9281037-9292762	0.8	ENSMUSG00000022507	422122	ENSMUSG00000059003	284949	0.24	-0.19	0.5782	22	76046.2	brown4	4.2	0.1375	EMPTY	0.03	0.02	1.6	0.19	0.18	EMPTY	FALSE	FALSE	FALSE	FALSE	FALSE	FALSE
NONCO18690	chr16:9567905-9570929	44.7	ENSMUSG00000022507	708990	ENSMUSG00000059003	6782	0.11	0.52	TRUE	NONCO18690	chr16:9567905-9570929	44.7	ENSMUSG00000022507	708990	ENSMUSG00000059003	6782	0.11	0.52	0.6669	18	12.1	lightsteelblue1	287.7	0.0082	EMPTY	0.64	0	239.95	0.34	1.89	EMPTY	FALSE	FALSE	FALSE	FALSE	FALSE	FALSE
NONCO18695	chr16:10463062-10464835	0.2	ENSMUSG00000050908	15701	ENSMUSG00000022504	23344	EMPTY	EMPTY	FALSE	NONCO18695	chr16:10463062-10464835	0.2	ENSMUSG00000050908	15701	ENSMUSG00000022504	23344	EMPTY	EMPTY	1	14	64679.1	sienna3	2.4	0.1807	EMPTY	0.27	0.01	19.31	0.12	2.2	EMPTY	FALSE	FALSE	FALSE	FALSE	FALSE	FALSE
NONCO1871	chr5:28521308-28547767	1.4	ENSMUSG00000002633	54208	ENSMUSG00000029130	648226	-0.06	-0.21	FALSE	NONCO1871	chr5:28521308-28547767	1.4	ENSMUSG00000002633	54208	ENSMUSG00000029130	648226	-0.06	-0.21	1	7	3.4	greenyellow	4.7	0.9525	EMPTY	0.01	0.01	0.73	0.08	0.08	EMPTY	FALSE	FALSE	FALSE	FALSE	FALSE	FALSE
NONCO18712	chr16:11778386-11781496	6.7	ENSMUSG00000071669	22915	ENSMUSG00000065979	22226	0.14	0.13	FALSE	NONCO18712	chr16:11778386-11781496	6.7	ENSMUSG00000071669	22915	ENSMUSG00000065979	22226	0.14	0.13	1	17	5.6	ivory	64.7	0.5429	EMPTY	0.04	0	Inf	0.2	0.2	EMPTY	FALSE	TRUE	TRUE	TRUE	FALSE	FALSE
NONCO18717	chr16:13447939-13467245	1.6	ENSMUSG00000009569	30411	ENSMUSG00000022685	70720	-0.44	-0.39	FALSE	NONCO18717	chr16:13447939-13467245	1.6	ENSMUSG00000009569	30411	ENSMUSG00000022685	70720	-0.44	-0.39	0.7225	14	12.5	lightcyan	8.7	0.6194	EMPTY	0.11	0.02	6.61	0.04	3	EMPTY	FALSE	TRUE	FALSE	TRUE	FALSE	FALSE
NONCO18727	chr16:14956049-14969273	2.8	ENSMUSG00000068617	30171	ENSMUSG00000094472	348186	EMPTY	EMPTY	FALSE	NONCO18727	chr16:14956049-14969273	2.8	ENSMUSG00000068617	30171	ENSMUSG00000094472	348186	EMPTY	EMPTY	0.4325	4	10	brown	32.3	0.0193	EMPTY	EMPTY	EMPTY	EMPTY	EMPTY	EMPTY	EMPTY	FALSE	FALSE	FALSE	FALSE	TRUE	FALSE
NONCO1874	chr5:29794188-29795247	10.9	ENSMUSG00000029131	7711	ENSMUSG00000025746	217915	-0.02	-0.01	FALSE	NONCO1874	chr5:29794188-29795247	10.9	ENSMUSG00000029131	7711	ENSMUSG00000025746	217915	-0.02	-0.01	0.0661	2	5.9	darkmagenta	34.1	0.0003	EMPTY	0.79	0.07	11.36	0.11	7.26	EMPTY	FALSE	FALSE	FALSE	TRUE	TRUE	FALSE
NONCO18747	chr16:17734246-17735000	2.1	ENSMUSG00000012114	11317	ENSMUSG00000022750	24619	0.16	0.31	FALSE	NONCO18747	chr16:17734246-17735000	2.1	ENSMUSG00000012114	11317	ENSMUSG00000022750	24619	0.16	0.31	0.031	20	9.8	turquoise	3	0.4448	EMPTY	0.03	0.13	0.23	0.12	0.24	EMPTY	FALSE	FALSE	FALSE	TRUE	TRUE	FALSE
NONCO1875	chr5:29832055-29833222	4.5	ENSMUSG00000029131	45578	ENSMUSG00000025746	179940	-0.48	-0.33	FALSE	NONCO1875	chr5:29832055-29833222	4.5	ENSMUSG00000029131	45578	ENSMUSG00000025746	179940	-0.48	-0.33	0.3159	17	6.5	brown	28.4	0.0288	EMPTY	0.94	0.14	6.6	0.19	4.83	EMPTY	FALSE	FALSE	FALSE	FALSE	FALSE	FALSE
NONCO18777	chr16:20822087-20829284	636.3	ENSMUSG00000006958	79704	ENSMUSG00000090356	323372	-0.17	0.29	TRUE	NONCO18777	chr16:20822087-20829284	636.3	ENSMUSG00000006958	79704	ENSMUSG00000090356	323372	-0.17	0.29	0.0455	9	12	midnightblue	814	0	EMPTY	0.92	0.99	0.93	0.2	4.49	Rps10-ps2	FALSE	FALSE	FALSE	TRUE	TRUE	FALSE
NONCO18780	chr16:21794135-21809283	104.3	ENSMUSG00000022853	6292	ENSMUSG00000033618	82687	-0.32	-0.38	FALSE	NONCO18780	chr16:21794135-21809283	104.3	ENSMUSG00000022853	6292	ENSMUSG00000033618	82687	-0.32	-0.38	0.8745	8	1.4	saddlebrown	361.3	0.4931	EMPTY	0.01	0.13	0.1	0.04	0.35	1300002E11Rik	TRUE	TRUE	TRUE	TRUE	FALSE	FALSE
NONCO18793	chr16:22667919-22726506	0.4	ENSMUSG00000022861	10699	ENSMUSG00000033501	78698	-0.16	0.19	FALSE	NONCO18793	chr16:22667919-22726506	0.4	ENSMUSG00000022861	10699	ENSMUSG00000033501	78698	-0.16	0.19	0.1619	22	89815	turquoise	2.3	0.0929	EMPTY	0.08	0.14	0.58	0.27	0.31	EMPTY	FALSE	FALSE	FALSE	FALSE	FALSE	FALSE
NONCO18794	chr16:23050290-23050972	308.6	ENSMUSG00000060459	21190	ENSMUSG00000022875	6894	-0.34	0.56	FALSE	NONCO18794	chr16:23050290-23050972	308.6	ENSMUSG00000060459	21190	ENSMUSG00000022875	6894	-0.34	0.56	0.0795	6	2.1	midnightblue	1255.1	0	EMPTY	0.87	0.03	26.61	0.19	4.46	EMPTY	FALSE	FALSE	FALSE	TRUE	TRUE	FALSE
NONCO18800	chr16:23994395-23995308	6.5	ENSMUSG00000022508	5544	ENSMUSG00000033306	398043	0.1	0.21	FALSE	NONCO18800	chr16:23994395-23995308	6.5	ENSMUSG00000022508	5544	ENSMUSG00000033306	398043	0.1	0.21	1	9	2.6	turquoise	51.5	0.7021	ENSG00000265542	0.02	0.11	0.15	0.15	0.11	EMPTY	FALSE	FALSE	FALSE	TRUE	FALSE	FALSE
NONCO18804	chr16:25059639-25069058	0.1	ENSMUSG00000033306	67064	ENSMUSG00000048399	217760	EMPTY	EMPTY	FALSE	NONCO18804	chr16:25059639-25069058	0.1	ENSMUSG00000033306	67064	ENSMUSG00000048399	217760	EMPTY	EMPTY	1	17	44838.6	paleturquoise	2.3	0.4618	EMPTY	0.09	0.01	10.92	0	24.09	A230028O05Rik	TRUE	FALSE	TRUE	TRUE	FALSE	FALSE
NONCO18810	chr16:28565077-28569389	0.4	ENSMUSG00000022523	119851	ENSMUSG00000051065	256788	-0.01	-0.34	FALSE	NONCO18810	chr16:28565077-28569389	0.4	ENSMUSG00000022523	119851	ENSMUSG00000051065	256788	-0.01	-0.34	0.0954	4	78.1	brown	7.2	0.0167	EMPTY	0.02	0	18.01	0.18	0.14	EMPTY	FALSE	TRUE	FALSE	FALSE	FALSE	FALSE
NONCO18811	chr16:28603243-28604311	0.2	ENSMUSG00000022523	158017	ENSMUSG00000051065	221866	-0.06	-0.13	FALSE	NONCO18811	chr16:28603243-28604311	0.2	ENSMUSG00000022523	158017	ENSMUSG00000051065	221866	-0.06	-0.13	1	15	61823.9	yellowgreen	2.6	0.5481	EMPTY	0.02	0	4.36	0.32	0.06	EMPTY	FALSE	FALSE	FALSE	FALSE	FALSE	FALSE
NONCO18812	chr16:28669054-28686226	0.2	ENSMUSG00000022523	223828	ENSMUSG00000051065	139951	0.39	-0.01	FALSE	NONCO18812	chr16:28669054-28686226	0.2	ENSMUSG00000022523	223828	ENSMUSG00000051065	139951	0.39	-0.01	0.254	20	65440.4	paleturquoise	2.5	0.2946	EMPTY	0.04	0.02	2.77	0.03	1.38	EMPTY	FALSE	FALSE	FALSE	FALSE	FALSE	FALSE
NONCO18813	chr16:28695561-28695875	5.8	ENSMUSG00000022523	250335	ENSMUSG00000051065	130302	-0.34	-0.22	FALSE	NONCO18813	chr16:28695561-28695875	5.8	ENSMUSG00000022523	250335	ENSMUSG00000051065	130302	-0.34	-0.22	1	13	5.3	brown	11	0.5419	EMPTY	EMPTY	EMPTY	EMPTY	EMPTY	EMPTY	EMPTY	FALSE	FALSE	FALSE	FALSE	FALSE	TRUE
NONCO18814	chr16:28950902-28951421	6	ENSMUSG00000051065	21205	ENSMUSG00000022525	258275	0.38	-0.45	FALSE	NONCO18814	chr16:28950902-28951421	6	ENSMUSG00000051065	21205	ENSMUSG00000022525	258275	0.38	-0.45	0.3708	12	1.7	saddlebrown	73.7	0.2607	EMPTY	0.59	0.18	3.34	0.07	8.42	EMPTY	FALSE	FALSE	FALSE	TRUE	TRUE	FALSE
NONCO18819	chr16:29811058-29837941	0.5	ENSMUSG00000038084	156175	ENSMUSG00000075286	120553	EMPTY	EMPTY	FALSE	NONCO18819	chr16:29811058-29837941	0.5	ENSMUSG00000038084	156175	ENSMUSG00000075286	120553	EMPTY	EMPTY	1	15	11.6	darkred	5.5	0.7641	ENSG00000262052	0.29	0.07	4.16	0.03	9.82	Gm26834	TRUE	TRUE	FALSE	TRUE	FALSE	FALSE
NONCO18820	chr16:30008583-30021715	2.1	ENSMUSG00000075286	46277	ENSMUSG00000022528	42670	EMPTY	EMPTY	FALSE	NONCO18820	chr16:30008583-30021715	2.1	ENSMUSG00000075286	46277	ENSMUSG00000022528	42670	EMPTY	EMPTY	0.7225	3	2.7	brown	33.6	0.9377	ENSG00000262052	0.11	0.03	3.9	0.01	15.21	4632428C04Rik	TRUE	FALSE	FALSE	TRUE	FALSE	FALSE
NONCO18860	chr16:33137963-33138935	20.6	ENSMUSG00000022802	10269	ENSMUSG00000022807	46137	0.08	-0.73	FALSE	NONCO18860	chr16:33137963-33138935	20.6	ENSMUSG00000022802	10269	ENSMUSG00000022807	46137	0.08	-0.73	0.1619	9	2.2	midnightblue	162.7	0	EMPTY	0.43	0.08	5.34	0.3	1.44	EMPTY	FALSE	FALSE	FALSE	FALSE	TRUE	FALSE
NONCO1887	chr5:31569691-31596831	1.1	ENSMUSG00000029141	15650	ENSMUSG00000029142	105	EMPTY	EMPTY	FALSE	NONCO1887	chr5:31569691-31596831	1.1	ENSMUSG00000029141	15650	ENSMUSG00000029142	105	EMPTY	EMPTY	0.9921	22	18.2	brown	12.9	0.1863	EMPTY	0.38	0.24	1.61	0.13	2.86	EMPTY	FALSE	FALSE	FALSE	TRUE	FALSE	FALSE
NONCO18875	chr16:36103653-36111213	0.3	ENSMUSG00000075229	11536	ENSMUSG00000034362	8734	EMPTY	EMPTY	FALSE	NONCO18875	chr16:36103653-36111213	0.3	ENSMUSG00000075229	11536	ENSMUSG00000034362	8734	EMPTY	EMPTY	1	15	29828.6	lightsteelblue1	1.6	NA	ENSG00000248172	EMPTY	EMPTY	EMPTY	EMPTY	EMPTY	EMPTY	FALSE	FALSE	FALSE	TRUE	FALSE	FALSE
NONCO18876	chr16:36270049-36272117	0.2	ENSMUSG00000095620	12606	ENSMUSG00000071562	5032	-0.13	0.08	FALSE	NONCO18876	chr16:36270049-36272117	0.2	ENSMUSG00000095620	12606	ENSMUSG00000071562	5032	-0.13	0.08	0.5461	22	45058.3	yellowgreen	1.8	NA	EMPTY	0.05	0.09	0.5	0.07	0.69	EMPTY	FALSE	FALSE	FALSE	FALSE	FALSE	FALSE
NONCO18879	chr16:37107080-37109149	7	ENSMUSG00000034206	11664	ENSMUSG00000022829	5794	-0.3	0.07	FALSE	NONCO18879	chr16:37107080-37109149	7	ENSMUSG00000034206	11664	ENSMUSG00000022829	5794	-0.3	0.07	1	7	3.2	brown	144	0.0012	EMPTY	0.03	0.14	0.22	0.02	1.56	EMPTY	FALSE	FALSE	FALSE	FALSE	FALSE	FALSE
NONCO18881	chr16:37680761-37684591	0.8	ENSMUSG00000022820	26309	ENSMUSG00000022816	92283	-0.26	0.03	FALSE	NONCO18881	chr16:37680761-37684591	0.8	ENSMUSG00000022820	26309	ENSMUSG00000022816	92283	-0.26	0.03	0.5461	14	95073.8	ivory	3.8	0.0484	ENSG00000249497	0.07	0.28	0.26	0.46	0.16	EMPTY	FALSE	FALSE	TRUE	FALSE	FALSE	FALSE
NONCO18882	chr16:37696672-37697400	230.9	ENSMUSG00000022820	42220	ENSMUSG00000022816	79474	0.59	-0.76	TRUE	NONCO18882	chr16:37696672-37697400	230.9	ENSMUSG00000022820	42220	ENSMUSG00000022816	79474	0.59	-0.76	0.0122	10	28.8	midnightblue	8.6	0.0005	EMPTY	0.9	0.01	118.18	0.08	10.89	EMPTY	FALSE	FALSE	FALSE	TRUE	TRUE	FALSE
NONCO18893	chr16:39209273-39223328	0.3	ENSMUSG00000022790	182115	ENSMUSG00000061080	761034	-0.14	-0.31	FALSE	NONCO18893	chr16:39209273-39223328	0.3	ENSMUSG00000022790	182115	ENSMUSG00000061080	761034	-0.14	-0.31	0.1367	20	36167	turquoise	1.6	NA	EMPTY	0.07	0.14	0.53	0.18	0.42	EMPTY	FALSE	FALSE	FALSE	FALSE	FALSE	FALSE
NONCO1893	chr5:32712660-32713721	0.6	ENSMUSG00000014932	25595	ENSMUSG00000023452	22581	0.25	0.22	FALSE	NONCO1893	chr5:32712660-32713721	0.6	ENSMUSG00000014932	25595	ENSMUSG00000023452	22581	0.25	0.22	0.254	17	47497.8	blue	2.5	0.5208	EMPTY	0.61	0.01	93.83	0.19	3.12	EMPTY	FALSE	FALSE	FALSE	FALSE	FALSE	FALSE
NONCO18935	chr16:51363484-51364811	198.4	ENSMUSG00000050685	772331	ENSMUSG00000022637	666739	EMPTY	EMPTY	TRUE	NONCO18935	chr16:51363484-51364811	198.4	ENSMUSG00000050685	772331	ENSMUSG00000022637	666739	EMPTY	EMPTY	0.0122	1	6.2	turquoise	421.9	0	EMPTY	EMPTY	EMPTY	EMPTY	EMPTY	EMPTY	Gm6767	FALSE	FALSE	FALSE	TRUE	FALSE	FALSE
NONCO18942	chr16:56055684-56069914	1.1	ENSMUSG00000044763	17866	ENSMUSG00000052917	5496	0.31	0.18	FALSE	NONCO18942	chr16:56055684-56069914	1.1	ENSMUSG00000044763	17866	ENSMUSG00000052917	5496	0.31	0.18	0.5782	12	75326.1	brown	2.1	0.472	EMPTY	EMPTY	EMPTY	EMPTY	EMPTY	EMPTY	EMPTY	FALSE	FALSE	FALSE	FALSE	FALSE	FALSE
NONCO18974	chr16:74749973-74751314	0.4	ENSMUSG00000052516	338149	ENSMUSG00000032948	789201	EMPTY	EMPTY	FALSE	NONCO18974	chr16:74749973-74751314	0.4	ENSMUSG00000052516	338149	ENSMUSG00000032948	789201	EMPTY	EMPTY	1	18	99406.4	orange	5.8	0.4306	ENSG00000267420	0.12	0.14	0.86	0.14	0.89	EMPTY	FALSE	FALSE	FALSE	TRUE	FALSE	FALSE
NONCO18986	chr16:77620350-77624023	2.3	ENSMUSG00000079546	18257	ENSMUSG00000091193	222671	EMPTY	EMPTY	FALSE	NONCO18986	chr16:77620350-77624023	2.3	ENSMUSG00000079546	18257	ENSMUSG00000091193	222671	EMPTY	EMPTY	0.2979	6	24.8	brown	18.7	0.0323	EMPTY	0.26	0.09	2.95	0.05	4.91	EMPTY	FALSE	FALSE	FALSE	FALSE	FALSE	FALSE
NONCO18990	chr16:84513273-84513766	1.5	ENSMUSG00000094030	1683393	ENSMUSG00000022889	203811	EMPTY	EMPTY	FALSE	NONCO18990	chr16:84513273-84513766	1.5	ENSMUSG00000094030	1683393	ENSMUSG00000022889	203811	EMPTY	EMPTY	0.3482	14	85887.7	white	4.2	0.0803	EMPTY	0.94	0.03	34	0.01	70.72	EMPTY	FALSE	FALSE	FALSE	FALSE	FALSE	FALSE
NONCO18991	chr16:84514865-84526335	0.8	ENSMUSG00000094030	1684985	ENSMUSG00000022889	191242	EMPTY	EMPTY	TRUE	NONCO18991	chr16:84514865-84526335	0.8	ENSMUSG00000094030	1684985	ENSMUSG00000022889	191242	EMPTY	EMPTY	0.0443	20	101103	paleturquoise	5.2	0.0101	ENSG00000276728	0.09	0	18.7	0.07	1.37	EMPTY	FALSE	FALSE	FALSE	TRUE	FALSE	FALSE
NONCO18992	chr16:84558291-84559371	0.5	ENSMUSG00000094030	1728411	ENSMUSG00000022889	158206	EMPTY	EMPTY	FALSE	NONCO18992	chr16:84558291-84559371	0.5	ENSMUSG00000094030	1728411	ENSMUSG00000022889	158206	EMPTY	EMPTY	1	11	10.2	turquoise	3.5	0.887	EMPTY	0	0.04	0.06	0.02	0.1	EMPTY	FALSE	FALSE	FALSE	FALSE	FALSE	FALSE
NONCO19001	chr16:87834279-87839113	0.5	ENSMUSG00000025612	100934	ENSMUSG00000022935	57084	-0.47	0.05	TRUE	NONCO19001	chr16:87834279-87839113	0.5	ENSMUSG00000025612	100934	ENSMUSG00000022935	57084	-0.47	0.05	0.031	18	169646	paleturquoise	5.7	0.0016	EMPTY	0.2	0	397.03	0.04	4.56	2810407A14Rik	FALSE	FALSE	TRUE	FALSE	FALSE	FALSE
NONCO19005	chr16:88087125-88090982	0.1	ENSMUSG00000022935	30950	ENSMUSG00000055811	414826	EMPTY	EMPTY	FALSE	NONCO19005	chr16:88087125-88090982	0.1	ENSMUSG00000022935	30950	ENSMUSG00000055811	414826	EMPTY	EMPTY	0.4073	2	32.7	darkorange	2.6	0.1653	EMPTY	0.03	0.01	4.25	0.18	0.14	EMPTY	FALSE	FALSE	FALSE	FALSE	FALSE	FALSE
NONCO19006	chr16:88192743-88195396	0.3	ENSMUSG00000022935	136568	ENSMUSG00000055811	310412	EMPTY	EMPTY	FALSE	NONCO19006	chr16:88192743-88195396	0.3	ENSMUSG00000022935	136568	ENSMUSG00000055811	310412	EMPTY	EMPTY	1	9	5.4	orange	5.6	0.7274	EMPTY	0.07	0.01	9.12	0.1	0.68	EMPTY	FALSE	FALSE	FALSE	FALSE	FALSE	FALSE
NONCO19013	chr16:90089974-90092387	70.2	ENSMUSG00000002489	109895	ENSMUSG00000022982	128356	-0.1	-0.16	FALSE	NONCO19013	chr16:90089974-90092387	70.2	ENSMUSG00000002489	109895	ENSMUSG00000022982	128356	-0.1	-0.16	0.4325	20	8.9	turquoise	3.4	0.5618	EMPTY	0	0.02	0.16	0.02	0.17	EMPTY	FALSE	FALSE	FALSE	FALSE	TRUE	FALSE
NONCO19026	chr16:91464975-91470154	6.1	ENSMUSG00000022969	39142	ENSMUSG00000022967	15085	-0.06	-0.13	FALSE	NONCO19026	chr16:91464975-91470154	6.1	ENSMUSG00000022969	39142	ENSMUSG00000022967	15085	-0.06	-0.13	0.8745	9	2.8	midnightblue	50.6	0.6657	EMPTY	0.12	0.01	23.54	0.06	2.06	A930006K02Rik	TRUE	TRUE	FALSE	TRUE	FALSE	FALSE
NONCO19035	chr16:92154490-92156224	0.6	ENSMUSG00000039680	42264	ENSMUSG00000039672	136166	-0.03	-0.14	FALSE	NONCO19035	chr16:92154490-92156224	0.6	ENSMUSG00000039680	42264	ENSMUSG00000039672	136166	-0.03	-0.14	0.4726	22	54144.9	turquoise	2.9	0.1269	EMPTY	0.01	0	4.22	0.17	0.04	EMPTY	FALSE	FALSE	FALSE	FALSE	FALSE	FALSE
NONCO19036	chr16:92184961-92187190	0.7	ENSMUSG00000039680	72735	ENSMUSG00000039672	105200	-0.04	0.09	FALSE	NONCO19036	chr16:92184961-92187190	0.7	ENSMUSG00000039680	72735	ENSMUSG00000039672	105200	-0.04	0.09	1	9	216887	midnightblue	4.8	0.0128	EMPTY	0.08	0	50.36	0.52	0.15	EMPTY	FALSE	FALSE	FALSE	FALSE	FALSE	FALSE
NONCO19068	chr16:98074362-98079466	1	ENSMUSG00000080717	64363	End of chr16	98074362	EMPTY	EMPTY	FALSE	NONCO19068	chr16:98074362-98079466	1	ENSMUSG00000080717	64363	End of chr16	98074362	EMPTY	EMPTY	1	11	191255	turquoise	9.6	0.0747	EMPTY	0.2	0.14	1.44	0.17	1.22	EMPTY	FALSE	FALSE	FALSE	FALSE	FALSE	FALSE
NONCO19072	chr16:4016704-4017132	8.2	ENSMUSG00000039738	12935	ENSMUSG00000005980	19811	-0.33	-0.57	FALSE	NONCO19072	chr16:4016704-4017132	8.2	ENSMUSG00000039738	12935	ENSMUSG00000005980	19811	-0.33	-0.57	0.0795	8	100981	midnightblue	4.3	0.0012	ENSG00000263470	0.76	0.06	11.69	0.19	3.91	EMPTY	FALSE	FALSE	FALSE	TRUE	TRUE	FALSE
NONCO19087	chr16:6211592-6218926	0.9	ENSMUSG00000022544	955610	ENSMUSG00000008658	590297	0.36	-0.1	FALSE	NONCO19087	chr16:6211592-6218926	0.9	ENSMUSG00000022544	955610	ENSMUSG00000008658	590297	0.36	-0.1	0.4325	19	568332	blue	15	0.0062	EMPTY	0.65	0	182.12	0.29	2.26	EMPTY	FALSE	FALSE	FALSE	TRUE	FALSE	FALSE
NONCO19095	chr16:9107121-9107646	2.4	ENSMUSG00000022507	248206	ENSMUSG00000059003	470065	-0.32	0.48	TRUE	NONCO19095	chr16:9107121-9107646	2.4	ENSMUSG00000022507	248206	ENSMUSG00000059003	470065	-0.32	0.48	0.0377	13	14.4	midnightblue	9.4	0.0009	ENSG00000227036	0.99	0.02	64.35	0.06	17.63	EMPTY	FALSE	FALSE	FALSE	TRUE	FALSE	FALSE
NONCO19098	chr16:9567902-9570896	10	ENSMUSG00000022507	708987	ENSMUSG00000059003	6815	0.04	0.62	TRUE	NONCO19098	chr16:9567902-9570896	10	ENSMUSG00000022507	708987	ENSMUSG00000059003	6815	0.04	0.62	0.2696	18	15.3	lightsteelblue1	94.4	0	EMPTY	0.11	0	42.29	0.33	0.34	EMPTY	FALSE	FALSE	FALSE	FALSE	FALSE	FALSE
NONCO19120	chr16:12381234-12381715	11.3	ENSMUSG00000022494	110333	ENSMUSG00000022545	727970	0.11	0.25	FALSE	NONCO19120	chr16:12381234-12381715	11.3	ENSMUSG00000022494	110333	ENSMUSG00000022545	727970	0.11	0.25	0.2287	16	4.9	saddlebrown	22.4	0.0003	EMPTY	EMPTY	EMPTY	EMPTY	EMPTY	EMPTY	EMPTY	FALSE	FALSE	FALSE	TRUE	FALSE	FALSE
NONCO19131	chr16:13758087-13765912	4.3	ENSMUSG00000022683	27105	ENSMUSG00000022682	14788	-0.28	-0.4	FALSE	NONCO19131	chr16:13758087-13765912	4.3	ENSMUSG00000022683	27105	ENSMUSG00000022682	14788	-0.28	-0.4	0.4325	0	2.1	darkmagenta	108.6	0.487	EMPTY	EMPTY	EMPTY	EMPTY	EMPTY	EMPTY	EMPTY	FALSE	FALSE	TRUE	FALSE	FALSE	FALSE
NONCO19135	chr16:13960771-13962433	0.4	ENSMUSG00000022679	11153	ENSMUSG00000065968	19270	0.3	0.17	FALSE	NONCO19135	chr16:13960771-13962433	0.4	ENSMUSG00000022679	11153	ENSMUSG00000065968	19270	0.3	0.17	0.1817	4	9.1	turquoise	10.7	0.2225	EMPTY	0.02	0.01	2.35	0.05	0.45	EMPTY	FALSE	FALSE	FALSE	FALSE	FALSE	FALSE
NONCO19145	chr16:14953025-14971772	0.7	ENSMUSG00000068617	27147	ENSMUSG00000094472	345687	EMPTY	EMPTY	FALSE	NONCO19145	chr16:14953025-14971772	0.7	ENSMUSG00000068617	27147	ENSMUSG00000094472	345687	EMPTY	EMPTY	1	9	102657	brown	3.8	0.1937	EMPTY	0.44	0.14	3.08	0.22	2.03	EMPTY	FALSE	FALSE	FALSE	FALSE	FALSE	FALSE
NONCO19147	chr16:15868372-15869270	0.1	ENSMUSG00000022671	5004	ENSMUSG00000041974	19958	EMPTY	EMPTY	FALSE	NONCO19147	chr16:15868372-15869270	0.1	ENSMUSG00000022671	5004	ENSMUSG00000041974	19958	EMPTY	EMPTY	0.5782	14	34454.7	yellowgreen	1.1	NA	EMPTY	EMPTY	EMPTY	EMPTY	EMPTY	EMPTY	EMPTY	FALSE	FALSE	FALSE	FALSE	FALSE	FALSE
NONCO19158	chr16:17734293-17735449	5.3	ENSMUSG00000012114	11364	ENSMUSG00000022750	24170	-0.33	-0.75	FALSE	NONCO19158	chr16:17734293-17735449	5.3	ENSMUSG00000012114	11364	ENSMUSG00000022750	24170	-0.33	-0.75	0.1367	8	5.2	midnightblue	16.6	0.017	ENSG00000267665	0.09	0.13	0.72	0.21	0.42	EMPTY	FALSE	FALSE	FALSE	TRUE	FALSE	FALSE
NONCO19167	chr16:18694690-18711883	0.6	ENSMUSG00000072214	64753	ENSMUSG00000041378	64965	EMPTY	EMPTY	FALSE	NONCO19167	chr16:18694690-18711883	0.6	ENSMUSG00000072214	64753	ENSMUSG00000041378	64965	EMPTY	EMPTY	1	15	86528.4	paleturquoise	3.6	0.3135	EMPTY	0.1	0.14	0.69	0.13	0.78	EMPTY	FALSE	FALSE	FALSE	TRUE	FALSE	FALSE
NONCO19186	chr16:20820619-20820931	0.4	ENSMUSG00000006958	78236	ENSMUSG00000090356	331725	-0.05	-0.19	FALSE	NONCO19186	chr16:20820619-20820931	0.4	ENSMUSG00000006958	78236	ENSMUSG00000090356	331725	-0.05	-0.19	0.2979	10	30389.3	yellowgreen	0.7	NA	EMPTY	0.86	0.99	0.87	0.14	6.09	EMPTY	FALSE	FALSE	FALSE	FALSE	FALSE	FALSE
NONCO19189	chr16:21331900-21333685	20.6	ENSMUSG00000005958	108596	ENSMUSG00000033653	89434	0.3	0.46	FALSE	NONCO19189	chr16:21331900-21333685	20.6	ENSMUSG00000005958	108596	ENSMUSG00000033653	89434	0.3	0.46	0.5013	9	9.4	saddlebrown	290.7	0	EMPTY	0.19	0	190.98	0.1	1.87	EMPTY	FALSE	FALSE	FALSE	TRUE	FALSE	FALSE
NONCO19191	chr16:21834052-21835234	0.2	ENSMUSG00000022853	46209	ENSMUSG00000033618	56736	0.57	0.33	FALSE	NONCO19191	chr16:21834052-21835234	0.2	ENSMUSG00000022853	46209	ENSMUSG00000033618	56736	0.57	0.33	0.4325	20	42197.3	turquoise	1.8	NA	ENSG00000262873	0	0.07	0.06	0.12	0.04	EMPTY	FALSE	FALSE	FALSE	FALSE	FALSE	FALSE
NONCO19197	chr16:22293286-22295468	47.1	ENSMUSG00000022858	27282	ENSMUSG00000013089	85842	0.11	-0.5	FALSE	NONCO19197	chr16:22293286-22295468	47.1	ENSMUSG00000022858	27282	ENSMUSG00000013089	85842	0.11	-0.5	0.2696	9	7.5	midnightblue	34.9	0	EMPTY	0.8	0.32	2.51	0.07	11.98	Gm15776	FALSE	FALSE	FALSE	FALSE	TRUE	FALSE
NONCO19198	chr16:22457694-22461013	0.8	ENSMUSG00000013089	17976	ENSMUSG00000022861	7449	-0.13	-0.13	FALSE	NONCO19198	chr16:22457694-22461013	0.8	ENSMUSG00000013089	17976	ENSMUSG00000022861	7449	-0.13	-0.13	0.4726	20	165412	blue	4.9	0.1871	ENSG00000278200	0	0.02	0.13	0.07	0.03	EMPTY	FALSE	FALSE	FALSE	FALSE	FALSE	FALSE
NONCO19211	chr16:28570079-28601127	0.9	ENSMUSG00000022523	124853	ENSMUSG00000051065	225050	-0.3	-0.21	FALSE	NONCO19211	chr16:28570079-28601127	0.9	ENSMUSG00000022523	124853	ENSMUSG00000051065	225050	-0.3	-0.21	0.5461	4	326073	brown	9	0.0432	EMPTY	EMPTY	EMPTY	EMPTY	EMPTY	EMPTY	EMPTY	FALSE	FALSE	TRUE	FALSE	FALSE	FALSE
NONCO19212	chr16:28582429-28753272	48.6	ENSMUSG00000022523	137203	ENSMUSG00000051065	72905	0.91	-0.41	FALSE	NONCO19212	chr16:28582429-28753272	48.6	ENSMUSG00000022523	137203	ENSMUSG00000051065	72905	0.91	-0.41	0.0548	21	3.4	turquoise	302.2	0	EMPTY	0.05	0	58.95	0.06	0.77	EMPTY	FALSE	FALSE	FALSE	TRUE	FALSE	FALSE
NONCO19213	chr16:28640119-28644479	0.8	ENSMUSG00000022523	194893	ENSMUSG00000051065	181698	-0.08	-0.34	FALSE	NONCO19213	chr16:28640119-28644479	0.8	ENSMUSG00000022523	194893	ENSMUSG00000051065	181698	-0.08	-0.34	1	11	6.3	brown	8.9	0.746	EMPTY	0.09	0.1	0.82	0.03	2.66	EMPTY	FALSE	FALSE	FALSE	TRUE	FALSE	FALSE
NONCO19214	chr16:28694058-28694362	0.6	ENSMUSG00000022523	248832	ENSMUSG00000051065	131815	-0.07	-0.4	FALSE	NONCO19214	chr16:28694058-28694362	0.6	ENSMUSG00000022523	248832	ENSMUSG00000051065	131815	-0.07	-0.4	0.5013	0	11.4	brown	5.5	0.8244	EMPTY	0	0	0.82	0.07	0.02	EMPTY	FALSE	FALSE	FALSE	FALSE	FALSE	FALSE
NONCO19219	chr16:29786859-29834685	1.5	ENSMUSG00000038084	131976	ENSMUSG00000075286	123809	EMPTY	EMPTY	FALSE	NONCO19219	chr16:29786859-29834685	1.5	ENSMUSG00000038084	131976	ENSMUSG00000075286	123809	EMPTY	EMPTY	0.3482	22	469181	blue	26.2	0.0118	EMPTY	0.48	0	404.77	0.01	64.89	EMPTY	FALSE	TRUE	FALSE	FALSE	FALSE	FALSE
NONCO19220	chr16:29907519-29946713	1	ENSMUSG00000038084	252636	ENSMUSG00000075286	11781	EMPTY	EMPTY	FALSE	NONCO19220	chr16:29907519-29946713	1	ENSMUSG00000038084	252636	ENSMUSG00000075286	11781	EMPTY	EMPTY	1	5	42.4	blue	10.7	0.369	EMPTY	0.05	0	15.72	0.12	0.47	Gm26569	TRUE	FALSE	FALSE	TRUE	FALSE	FALSE
NONCO19223	chr16:30121644-30206478	3.3	ENSMUSG00000022528	53849	ENSMUSG00000023176	49901	EMPTY	EMPTY	FALSE	NONCO19223	chr16:30121644-30206478	3.3	ENSMUSG00000022528	53849	ENSMUSG00000023176	49901	EMPTY	EMPTY	0.3482	4	15.2	lightyellow	30.2	0.0524	ENSG00000263063	0.57	0.21	2.73	0.07	8.61	Gm26562	FALSE	FALSE	TRUE	TRUE	FALSE	FALSE
NONCO19224	chr16:30138270-30139902	4.3	ENSMUSG00000022528	70475	ENSMUSG00000023176	116477	EMPTY	EMPTY	TRUE	NONCO19224	chr16:30138270-30139902	4.3	ENSMUSG00000022528	70475	ENSMUSG00000023176	116477	EMPTY	EMPTY	0.0455	9	9	midnightblue	10.9	0.0014	EMPTY	0.87	0.01	142.76	0.02	52.13	EMPTY	FALSE	FALSE	FALSE	TRUE	TRUE	FALSE
NONCO19232	chr16:31495833-31508245	0.7	ENSMUSG00000046598	36933	ENSMUSG00000022770	155199	-0.09	-0.16	FALSE	NONCO19232	chr16:31495833-31508245	0.7	ENSMUSG00000046598	36933	ENSMUSG00000022770	155199	-0.09	-0.16	1	9	22	greenyellow	1.6	NA	EMPTY	0.04	0.95	0.04	0.07	0.59	EMPTY	FALSE	FALSE	FALSE	FALSE	FALSE	FALSE
NONCO19245	chr16:32326211-32326721	1.5	ENSMUSG00000014074	24778	ENSMUSG00000053774	5532	-0.5	0.27	TRUE	NONCO19245	chr16:32326211-32326721	1.5	ENSMUSG00000014074	24778	ENSMUSG00000053774	5532	-0.5	0.27	0.018	14	39.1	darkgreen	7.2	0.0004	EMPTY	0.73	0.13	5.41	0.08	9.22	EMPTY	FALSE	FALSE	FALSE	FALSE	TRUE	FALSE
NONCO19291	chr16:36099558-36100647	0.6	ENSMUSG00000075229	7441	ENSMUSG00000034362	19300	EMPTY	EMPTY	FALSE	NONCO19291	chr16:36099558-36100647	0.6	ENSMUSG00000075229	7441	ENSMUSG00000034362	19300	EMPTY	EMPTY	0.4726	2	111.5	lightyellow	5.7	0.0646	EMPTY	0.23	0.37	0.62	0.29	0.81	EMPTY	FALSE	FALSE	FALSE	FALSE	FALSE	FALSE
NONCO19313	chr16:39176117-39230701	0.8	ENSMUSG00000022790	148959	ENSMUSG00000061080	753661	-0.09	-0.32	FALSE	NONCO19313	chr16:39176117-39230701	0.8	ENSMUSG00000022790	148959	ENSMUSG00000061080	753661	-0.09	-0.32	0.0759	22	72333	turquoise	3	0.119	EMPTY	0.08	0.14	0.59	0.07	1.25	EMPTY	FALSE	FALSE	FALSE	TRUE	FALSE	FALSE
NONCO19337	chr16:45069296-45082780	0.9	ENSMUSG00000036172	87917	ENSMUSG00000022665	10623	EMPTY	EMPTY	FALSE	NONCO19337	chr16:45069296-45082780	0.9	ENSMUSG00000036172	87917	ENSMUSG00000022665	10623	EMPTY	EMPTY	0.9417	18	80716.5	white	4.4	0.5961	EMPTY	0.24	0.22	1.07	0.01	34.63	EMPTY	FALSE	FALSE	FALSE	FALSE	FALSE	FALSE
NONCO19339	chr16:45199369-45208598	1.5	ENSMUSG00000022663	10832	ENSMUSG00000052013	15718	EMPTY	EMPTY	FALSE	NONCO19339	chr16:45199369-45208598	1.5	ENSMUSG00000022663	10832	ENSMUSG00000052013	15718	EMPTY	EMPTY	0.0661	6	5.7	brown	18.9	0.2294	EMPTY	EMPTY	EMPTY	EMPTY	EMPTY	EMPTY	EMPTY	FALSE	FALSE	FALSE	FALSE	FALSE	FALSE
NONCO19340	chr16:45204300-45205574	73.6	ENSMUSG00000022663	15763	ENSMUSG00000052013	18742	EMPTY	EMPTY	FALSE	NONCO19340	chr16:45204300-45205574	73.6	ENSMUSG00000022663	15763	ENSMUSG00000052013	18742	EMPTY	EMPTY	0.0954	13	4	saddlebrown	63.5	0	EMPTY	1	0.14	7.01	0.19	5.13	Gm6030	FALSE	FALSE	FALSE	TRUE	TRUE	FALSE
NONCO19345	chr16:46144111-46145002	0.8	ENSMUSG00000022657	23861	ENSMUSG00000048087	7996	0.76	-0.16	FALSE	NONCO19345	chr16:46144111-46145002	0.8	ENSMUSG00000022657	23861	ENSMUSG00000048087	7996	0.76	-0.16	1	5	32	brown	4.2	0.6954	EMPTY	0	0.14	0.01	0.29	0	EMPTY	FALSE	FALSE	FALSE	FALSE	FALSE	FALSE
NONCO19353	chr16:53984487-53985614	5.6	ENSMUSG00000022636	1530414	ENSMUSG00000064310	1239562	-0.57	0.14	TRUE	NONCO19353	chr16:53984487-53985614	5.6	ENSMUSG00000022636	1530414	ENSMUSG00000064310	1239562	-0.57	0.14	0.0214	20	9.3	turquoise	50.4	0	EMPTY	0.98	0.02	58.28	0.06	16.88	EMPTY	FALSE	FALSE	FALSE	TRUE	FALSE	FALSE
NONCO19361	chr16:56914097-56928151	1.4	ENSMUSG00000022754	27932	ENSMUSG00000046748	108817	EMPTY	EMPTY	TRUE	NONCO19361	chr16:56914097-56928151	1.4	ENSMUSG00000022754	27932	ENSMUSG00000046748	108817	EMPTY	EMPTY	0.0259	20	411094	turquoise	13.1	0	EMPTY	0.63	0.14	4.42	0.19	3.24	EMPTY	FALSE	FALSE	FALSE	TRUE	FALSE	FALSE
NONCO19377	chr16:62716954-62718847	21.5	ENSMUSG00000055540	2111424	ENSMUSG00000050312	13598	-0.53	-0.36	FALSE	NONCO19377	chr16:62716954-62718847	21.5	ENSMUSG00000055540	2111424	ENSMUSG00000050312	13598	-0.53	-0.36	0.2287	8	2.3	brown	49.6	0.0993	EMPTY	0.76	0	Inf	0.03	23.43	Gm9816	FALSE	FALSE	FALSE	TRUE	TRUE	FALSE
NONCO19385	chr16:64917284-64918925	3.5	ENSMUSG00000054604	57778	ENSMUSG00000050783	5805	-0.31	0.11	TRUE	NONCO19385	chr16:64917284-64918925	3.5	ENSMUSG00000054604	57778	ENSMUSG00000050783	5805	-0.31	0.11	0.0038	14	16.1	darkgreen	15.2	0	EMPTY	1	0	605.09	0.07	14.71	EMPTY	FALSE	FALSE	FALSE	FALSE	FALSE	FALSE
NONCO19401	chr16:74905408-74989885	0.2	ENSMUSG00000052516	493584	ENSMUSG00000032948	550630	EMPTY	EMPTY	FALSE	NONCO19401	chr16:74905408-74989885	0.2	ENSMUSG00000052516	493584	ENSMUSG00000032948	550630	EMPTY	EMPTY	0.2696	14	28382.7	brown4	1.4	NA	EMPTY	0.82	0	410.05	0.12	6.79	EMPTY	FALSE	FALSE	FALSE	FALSE	FALSE	FALSE
NONCO19402	chr16:74924434-75092869	1.2	ENSMUSG00000052516	512610	ENSMUSG00000032948	447646	EMPTY	EMPTY	TRUE	NONCO19402	chr16:74924434-75092869	1.2	ENSMUSG00000052516	512610	ENSMUSG00000032948	447646	EMPTY	EMPTY	0.4073	20	164478	lightsteelblue1	7.7	0.008	EMPTY	0.97	0	484.12	0.01	125.26	EMPTY	FALSE	FALSE	FALSE	TRUE	FALSE	FALSE
NONCO19403	chr16:75310046-75447321	6.6	ENSMUSG00000052516	898222	ENSMUSG00000032948	93194	EMPTY	EMPTY	FALSE	NONCO19403	chr16:75310046-75447321	6.6	ENSMUSG00000052516	898222	ENSMUSG00000032948	93194	EMPTY	EMPTY	0.5782	20	278713	turquoise	14.3	0.0193	EMPTY	0.27	0.49	0.55	0.16	1.73	EMPTY	FALSE	TRUE	FALSE	TRUE	FALSE	FALSE
NONCO19406	chr16:76821245-76821799	4	ENSMUSG00000050299	417534	ENSMUSG00000022867	192271	-0.31	-0.15	TRUE	NONCO19406	chr16:76821245-76821799	4	ENSMUSG00000050299	417534	ENSMUSG00000022867	192271	-0.31	-0.15	0.0038	14	255892	darkgreen	7.6	0	EMPTY	1	0.01	132.59	0.31	3.26	1700063K16Rik	FALSE	FALSE	FALSE	FALSE	FALSE	FALSE
NONCO19410	chr16:77642247-77643168	1.4	ENSMUSG00000079546	40154	ENSMUSG00000091193	203526	EMPTY	EMPTY	FALSE	NONCO19410	chr16:77642247-77643168	1.4	ENSMUSG00000079546	40154	ENSMUSG00000091193	203526	EMPTY	EMPTY	1	13	4.8	turquoise	3.7	0.8535	EMPTY	0.76	0	371.01	0.76	1.01	EMPTY	FALSE	FALSE	FALSE	FALSE	FALSE	FALSE
NONCO19412	chr16:78250900-78251793	1.3	ENSMUSG00000091193	397881	ENSMUSG00000022865	49704	EMPTY	EMPTY	FALSE	NONCO19412	chr16:78250900-78251793	1.3	ENSMUSG00000091193	397881	ENSMUSG00000022865	49704	EMPTY	EMPTY	1	9	13.1	brown	11.6	0.714	EMPTY	0.01	0.01	0.44	0.04	0.17	EMPTY	FALSE	FALSE	FALSE	FALSE	TRUE	FALSE
NONCO19414	chr16:78643907-78653398	4.4	ENSMUSG00000022864	67251	ENSMUSG00000022860	277551	0.33	0.32	TRUE	NONCO19414	chr16:78643907-78653398	4.4	ENSMUSG00000022864	67251	ENSMUSG00000022860	277551	0.33	0.32	0.0149	5	49.9	brown	23.8	0	EMPTY	0.04	0.14	0.29	0.06	0.74	EMPTY	FALSE	FALSE	FALSE	FALSE	FALSE	FALSE
NONCO19422	chr16:86065405-86074739	0.7	ENSMUSG00000022894	164281	ENSMUSG00000044442	1279447	-0.11	-0.02	FALSE	NONCO19422	chr16:86065405-86074739	0.7	ENSMUSG00000022894	164281	ENSMUSG00000044442	1279447	-0.11	-0.02	1	9	5.1	darkred	6.4	0.7506	EMPTY	0.01	0	Inf	0.19	0.03	EMPTY	FALSE	FALSE	FALSE	FALSE	FALSE	FALSE
NONCO19424	chr16:86691596-86706871	2.1	ENSMUSG00000022894	790472	ENSMUSG00000044442	647315	-0.05	0.12	FALSE	NONCO19424	chr16:86691596-86706871	2.1	ENSMUSG00000022894	790472	ENSMUSG00000044442	647315	-0.05	0.12	1	13	4	lightyellow	14.7	0.7049	EMPTY	0	0.02	0.17	0.12	0.03	EMPTY	FALSE	FALSE	FALSE	FALSE	FALSE	FALSE
NONCO19428	chr16:88201547-88203048	0.4	ENSMUSG00000022935	145372	ENSMUSG00000055811	302760	EMPTY	EMPTY	FALSE	NONCO19428	chr16:88201547-88203048	0.4	ENSMUSG00000022935	145372	ENSMUSG00000055811	302760	EMPTY	EMPTY	0.3482	6	32.5	brown	7.4	0.3387	EMPTY	0	0.01	0.13	0.03	0.05	EMPTY	FALSE	FALSE	FALSE	FALSE	FALSE	FALSE
NONCO19429	chr16:88276187-88283691	0.5	ENSMUSG00000022935	220012	ENSMUSG00000055811	222117	EMPTY	EMPTY	FALSE	NONCO19429	chr16:88276187-88283691	0.5	ENSMUSG00000022935	220012	ENSMUSG00000055811	222117	EMPTY	EMPTY	1	13	5	darkred	5.3	0.9102	EMPTY	0	0.05	0.05	0.03	0.1	EMPTY	FALSE	FALSE	FALSE	FALSE	FALSE	FALSE
NONCO19431	chr16:90064599-90143838	2.4	ENSMUSG00000002489	84520	ENSMUSG00000022982	76905	0.45	0.2	FALSE	NONCO19431	chr16:90064599-90143838	2.4	ENSMUSG00000002489	84520	ENSMUSG00000022982	76905	0.45	0.2	0.254	14	7.2	saddlebrown	6.1	0.2686	EMPTY	0.05	0.01	6.94	0.09	0.58	EMPTY	FALSE	FALSE	FALSE	TRUE	FALSE	FALSE
NONCO19434	chr16:90090014-90090620	34.8	ENSMUSG00000002489	109935	ENSMUSG00000022982	130123	-0.19	-0.52	FALSE	NONCO19434	chr16:90090014-90090620	34.8	ENSMUSG00000002489	109935	ENSMUSG00000022982	130123	-0.19	-0.52	0.3159	22	2.5	turquoise	188.2	0.0679	EMPTY	0.62	0.02	37.75	0.03	24.1	EMPTY	FALSE	FALSE	FALSE	TRUE	TRUE	FALSE
NONCO19436	chr16:90343222-90349642	0.3	ENSMUSG00000022983	58798	ENSMUSG00000053414	36756	-0.55	0.49	FALSE	NONCO19436	chr16:90343222-90349642	0.3	ENSMUSG00000022983	58798	ENSMUSG00000053414	36756	-0.55	0.49	1	22	13.8	turquoise	10.6	0.4806	EMPTY	EMPTY	EMPTY	EMPTY	EMPTY	EMPTY	EMPTY	FALSE	FALSE	FALSE	FALSE	FALSE	FALSE
NONCO1945	chr5:41342097-41343003	38.3	ENSMUSG00000051022	1586623	ENSMUSG00000029128	281974	-0.22	0.17	FALSE	NONCO1945	chr5:41342097-41343003	38.3	ENSMUSG00000051022	1586623	ENSMUSG00000029128	281974	-0.22	0.17	0.193	4	5.1	midnightblue	218.5	0	EMPTY	0.93	0	289.13	0.02	46.06	EMPTY	FALSE	FALSE	FALSE	TRUE	TRUE	FALSE
NONCO19455	chr16:91991005-91995919	1.8	ENSMUSG00000022956	59319	ENSMUSG00000039680	62352	EMPTY	EMPTY	FALSE	NONCO19455	chr16:91991005-91995919	1.8	ENSMUSG00000022956	59319	ENSMUSG00000039680	62352	EMPTY	EMPTY	1	15	172024	brown4	6.7	0.3328	EMPTY	0.1	0.01	9.69	0.06	1.6	EMPTY	FALSE	FALSE	FALSE	TRUE	FALSE	TRUE
NONCO19470	chr16:94723683-94724856	0.9	ENSMUSG00000022897	28167	ENSMUSG00000043301	24411	-0.35	0.04	FALSE	NONCO19470	chr16:94723683-94724856	0.9	ENSMUSG00000022897	28167	ENSMUSG00000043301	24411	-0.35	0.04	1	15	296960	darkred	13	0.0095	EMPTY	0.01	0	2.66	0.16	0.03	EMPTY	FALSE	FALSE	FALSE	TRUE	FALSE	FALSE
NONCO19473	chr16:95764128-95802339	1.8	ENSMUSG00000022895	43078	ENSMUSG00000022913	177595	-0.08	-0.47	FALSE	NONCO19473	chr16:95764128-95802339	1.8	ENSMUSG00000022895	43078	ENSMUSG00000022913	177595	-0.08	-0.47	0.5013	20	31	lightsteelblue1	5.3	0.1732	EMPTY	0	0.05	0.04	0.13	0.02	EMPTY	FALSE	FALSE	FALSE	TRUE	FALSE	FALSE
NONCO19474	chr16:95806029-95808317	0.1	ENSMUSG00000022895	84979	ENSMUSG00000022913	171617	0.11	0.25	FALSE	NONCO19474	chr16:95806029-95808317	0.1	ENSMUSG00000022895	84979	ENSMUSG00000022913	171617	0.11	0.25	0.4073	8	47650.7	darkorange	2.2	0.2863	EMPTY	0.05	0.05	0.94	0.06	0.88	2810404F17Rik	TRUE	FALSE	TRUE	TRUE	FALSE	FALSE
NONCO19475	chr16:95831120-95929077	0.9	ENSMUSG00000022895	110070	ENSMUSG00000022913	50857	0.28	0.35	TRUE	NONCO19475	chr16:95831120-95929077	0.9	ENSMUSG00000022895	110070	ENSMUSG00000022913	50857	0.28	0.35	0.0443	4	24.7	midnightblue	10.7	0.0344	EMPTY	0.06	0	26.74	0.04	1.51	1600002D24Rik	TRUE	FALSE	FALSE	TRUE	FALSE	FALSE
NONCO1948	chr5:41853412-41853891	2.3	ENSMUSG00000061755	9245	ENSMUSG00000067285	214070	0.15	0.75	FALSE	NONCO1948	chr5:41853412-41853891	2.3	ENSMUSG00000061755	9245	ENSMUSG00000067285	214070	0.15	0.75	0.0661	13	8.4	saddlebrown	14.5	0.0005	EMPTY	0.79	0	157.98	0.19	4.07	EMPTY	FALSE	FALSE	FALSE	FALSE	FALSE	FALSE
NONCO19480	chr16:98050679-98082407	3.7	ENSMUSG00000080717	40680	End of chr16	98050679	EMPTY	EMPTY	FALSE	NONCO19480	chr16:98050679-98082407	3.7	ENSMUSG00000080717	40680	End of chr16	98050679	EMPTY	EMPTY	1	5	2.4	midnightblue	26.5	0.6805	EMPTY	0.07	0.26	0.28	0.19	0.38	EMPTY	FALSE	FALSE	TRUE	TRUE	FALSE	FALSE
[truncated: 1,931 more rows]
