# Supplementary material for: Temporal transcriptomics suggest that twin-peaking genes reset the clock
Source: eLife. 2015 Nov 2;4:e10518. doi: 10.7554/eLife.10518 (PMC4718813; doi:10.7554/eLife.10518)
Supplement: Supplementary file 4. — DOI: http://dx.doi.org/10.7554/eLife.10518.014 [file elife-10518-supp4.xls]

## Sheet: NovelExons_S4
Gene	Coordinates	Length	# of mapped reads	Reads per 100bp
Cntnap5b	chr1:100180097-100180443	346	966	2.8
9330185C12Rik	chr1:113933438-113933453	15	263	17.5
9330185C12Rik	chr1:113935152-113935319	167	214	1.3
Gm3551	chr1:119896233-119897036	803	99	0.1
Map3k19	chr1:127841030-127841184	154	704	4.6
Plekha6	chr1:133208246-133208398	152	39	0.3
Plekha6	chr1:133208246-133210110	1864	204	0.1
Plekha6	chr1:133209626-133209735	109	101	0.9
Plekha6	chr1:133209828-133210110	282	61	0.2
Optc	chr1:133908516-133908553	37	534	14.4
Ppfia4	chr1:134344593-134344710	117	119	1
Lmod1	chr1:135353321-135353673	352	182	0.5
Csrp1	chr1:135744640-135744655	15	58	3.9
Camsap2	chr1:136345153-136345193	40	23	0.6
Nek7	chr1:138504969-138505031	62	37	0.6
Zbtb41	chr1:139422294-139422326	32	60	1.9
C230024C17Rik	chr1:153739602-153740160	558	328	0.6
Rasal2	chr1:157224907-157225465	558	62	0.1
Suco	chr1:161827300-161827384	84	70	0.8
RP24	chr1:164462033-164462144	111	73	0.7
Gm16418	chr1:166434284-166434291	7	23	3.3
Nos1ap	chr1:170314708-170316348	1640	335	0.2
Atf6	chr1:170857379-170857470	91	90	1
Gm2962	chr1:170949414-170949422	8	68	8.5
Tma7	chr1:171711410-171711455	45	299	6.6
Dcaf8	chr1:172150512-172150614	102	28	0.3
Casq1	chr1:172210993-172211049	56	31	0.6
Casq1	chr1:172211416-172211548	132	51	0.4
Casq1	chr1:172211731-172211886	155	106	0.7
Rgs7	chr1:175491934-175491973	39	40	1
RP24	chr1:178284531-178284632	101	321	3.2
Dusp10	chr1:184034735-184034767	32	26	0.8
Bpnt1	chr1:185349837-185349881	44	2456	55.8
Ppp2r5a	chr1:191388704-191389444	740	244	0.3
Ppp2r5a	chr1:191388705-191389298	593	233	0.4
Ppp2r5a	chr1:191388705-191389423	718	244	0.3
Ppp2r5a	chr1:191389038-191389300	262	105	0.4
Lpgat1	chr1:191720615-191720795	180	78	0.4
Syt14	chr1:192983520-192984911	1391	502	0.4
Rims1	chr1:22390537-22390636	99	387	3.9
Rims1	chr1:22393919-22393937	18	186	10.3
Gm16894	chr1:40028053-40029179	1126	308	0.3
Gm20646	chr1:42740573-42740968	395	44	0.1
Gm19587	chr1:43889374-43889730	356	235	0.7
Gm19587	chr1:43889430-43889730	300	170	0.6
Tcea1	chr1:4879503-4879814	311	153	0.5
1700019D03Rik	chr1:52953542-52953739	197	49	0.2
Pms1	chr1:53291757-53291835	78	55	0.7
Fam126b	chr1:58560452-58560503	51	1493	29.3
Eif4a	chr1:60705468-60705737	269	334	1.2
Creb1	chr1:64558948-64559030	82	261	3.2
Creb1	chr1:64558957-64559030	73	261	3.6
Rpl10a	chr1:64998307-64998314	7	23	3.3
D630023F18Rik	chr1:65122699-65122832	133	87	0.7
D230017M19Rik	chr1:72244194-72244213	19	84	4.4
Pecr	chr1:72261121-72261186	65	752	11.6
Pecr	chr1:72262173-72262330	157	755	4.8
Igfbp5	chr1:72868271-72868281	10	45	4.5
Pnkd	chr1:74318336-74318521	185	52	0.3
Ptprn	chr1:75268712-75268808	96	55	0.6
Ptprn	chr1:75268897-75269088	191	24	0.1
Gm5830	chr1:78966374-78966503	129	35	0.3
Gm5830	chr1:78966374-78966754	380	92	0.2
Pam	chr1:97948825-97948878	53	36	0.7
Cep290	chr10:100487576-100487752	176	1764	10
Ppfia2	chr10:106632540-106632878	338	3479	10.3
Ppfia2	chr10:106835177-106835222	45	225	5
Ppp1r12a	chr10:108277723-108279990	2267	616	0.3
Kcnc2	chr10:112270310-112270548	238	74	0.3
Kcnc2	chr10:112270907-112270994	87	25	0.3
Epm2a	chr10:11433673-11433691	18	27	1.5
Epm2a	chr10:11433680-11433692	12	22	1.8
Tmem19	chr10:115362387-115362512	125	236	1.9
Srgap1	chr10:122014358-122014474	116	35	0.3
Arhgef25	chr10:127188251-127188276	25	133	5.3
Cs	chr10:128348693-128348875	182	140	0.8
Coq10a	chr10:128368519-128368693	174	736	4.2
Rnf41	chr10:128427975-128428013	38	128	3.4
Pmel	chr10:128717564-128717615	51	155	3
Dgka	chr10:128737539-128737585	46	161	3.5
Map3k5	chr10:20143374-20144259	885	119	0.1
Map3k5	chr10:20143793-20144233	440	64	0.1
Pde7b	chr10:20397045-20397529	484	140	0.3
RP23	chr10:22054862-22055117	255	914	3.6
Gm5421	chr10:22345868-22345936	68	33	0.5
Rps12	chr10:23779361-23779442	81	388	4.8
Rps12	chr10:23780498-23780521	23	295	12.8
Ptprk	chr10:28565096-28565443	347	343	1
Gm9824	chr10:29031232-29031319	87	42	0.5
Soga3	chr10:29200134-29201841	1707	195	0.1
Soga3	chr10:29203024-29203432	408	104	0.3
9330159F19Rik	chr10:29214947-29215280	333	249	0.7
9330159F19Rik	chr10:29214947-29216672	1725	491	0.3
9330159F19Rik	chr10:29215954-29216672	718	241	0.3
Rspo3	chr10:29452694-29452768	74	22	0.3
Trmt11	chr10:30567761-30567871	110	134	1.2
Plekhg1	chr10:3863886-3863913	27	141	5.2
Armc2	chr10:42018478-42018536	58	209	3.6
Scml4	chr10:42862411-42862656	245	761	3.1
Akap12	chr10:4334542-4334709	167	209	1.3
Lin28b	chr10:45469420-45469575	155	244	1.6
Gopc	chr10:52340947-52341451	504	165	0.3
Gopc	chr10:52342270-52342750	480	77	0.2
Gopc	chr10:52342593-52342750	157	56	0.4
Gopc	chr10:52342838-52342866	28	21	0.8
Mcm9	chr10:53580577-53580823	246	36	0.1
Syne1	chr10:5426213-5426237	24	23	1
Pald1	chr10:61359214-61359427	213	56	0.3
Eif4ebp2	chr10:61428492-61428650	158	105	0.7
Eif4ebp2	chr10:61452763-61452798	35	48	1.4
Slc25a16	chr10:62927831-62928019	188	25	0.1
Lrp11	chr10:7608766-7608782	16	76	4.8
Slc1a6	chr10:78779560-78779881	321	239	0.7
1600002K03Rik	chr10:80173278-80173658	380	52	0.1
Sgta	chr10:81059906-81059933	27	425	15.7
Celf5	chr10:81481839-81482018	179	117	0.7
Zfp873	chr10:82064189-82064855	666	171	0.3
AU041133	chr10:82143587-82143619	32	194	6.1
Zfp938	chr10:82196627-82196732	105	703	6.7
A230046K03Rik	chr10:83547111-83547132	21	82	3.9
Cry1	chr10:85183510-85183832	322	150	0.5
Actr6	chr10:89725907-89725934	27	62	2.3
Rmst	chr10:92075793-92075815	22	29	1.3
Tmcc3	chr10:94338793-94339171	378	116	0.3
Eea1	chr10:95996605-95996752	147	30	0.2
Atp2b1	chr10:98914681-98914793	112	2725	24.3
Atp2b1	chr10:98914681-98914794	113	2725	24.1
Atp2b1	chr10:99019407-99019431	24	2024	84.3
Rundc1	chr11:101405794-101406606	812	209	0.3
Ccdc103	chr11:102882103-102882174	71	80	1.1
Tanc2	chr11:105789744-105789826	82	43	0.5
Snord104	chr11:106501133-106501204	71	25557	360
Gm11668	chr11:109011643-109012125	482	51530	106.9
Gm11668	chr11:109011643-109012157	514	51530	100.3
2610035D17Rik	chr11:113066678-113066738	60	20	0.3
Fam104a	chr11:113683123-113683351	228	406	1.8
Grin2c	chr11:115263902-115264940	1038	209	0.2
Grb2	chr11:115650057-115650116	59	46	0.8
Tbc1d16	chr11:119175347-119175391	44	22	0.5
Ccdc40	chr11:119257037-119257348	311	2024	6.5
Ccdc40	chr11:119257037-119258682	1645	4244	2.6
Ccdc40	chr11:119258407-119258682	275	2106	7.7
Ccdc40	chr11:119258408-119258671	263	2106	8
Gm12663	chr11:16634086-16634360	274	77	0.3
Wdr92	chr11:17221282-17221524	242	5074	21
Spred2	chr11:19979556-19979702	146	128	0.9
Actr2	chr11:20070985-20070996	11	39	3.5
Tmem17	chr11:22511906-22511929	23	29	1.3
5730522E02Rik	chr11:26092271-26092353	82	36	0.4
Erlec1	chr11:30899657-30900986	1329	239	0.2
Aff4	chr11:53362880-53364384	1504	2125	1.4
Lyrm7	chr11:54853434-54853542	108	313	2.9
Gm11963	chr11:5485860-5486088	228	448	2
Gm11963	chr11:5505232-5505399	167	273	1.6
Gemin5	chr11:58130389-58130519	130	359	2.8
Gemin5	chr11:58140492-58140644	152	90	0.6
Mrpl22	chr11:58180741-58181626	885	158	0.2
Rai1	chr11:60131524-60131903	379	960	2.5
Zfp286	chr11:62783410-62783459	49	123	2.5
Nxn	chr11:76357416-76357634	218	34	0.2
Rpl23a	chr11:78185507-78185787	280	127	0.5
Rpl23a	chr11:78185962-78186428	466	196	0.4
Rpl23a	chr11:78185962-78187644	1682	377	0.2
Rpl23a	chr11:78187390-78187644	254	143	0.6
Nf1	chr11:79340590-79340903	313	105	0.3
Synrg	chr11:83950708-83950761	53	14204	268
Lhx1	chr11:84520779-84520797	18	40	2.2
Lhx1	chr11:84523935-84523970	35	20	0.6
Lhx1os	chr11:84527518-84527586	68	221	3.2
Bcas3	chr11:85562886-85562983	97	13811	142.4
Bcas3	chr11:85650894-85650936	42	1623	38.6
Trim37	chr11:87250591-87250854	263	1004	3.8
Msi2	chr11:88368212-88368223	11	128	11.6
C030037D09Rik	chr11:88724423-88724996	573	75	0.1
Tmem100	chr11:90033313-90033390	77	120	1.6
Utp18	chr11:93861489-93861497	8	56	7
Mbtd1	chr11:93888160-93888207	47	36	0.8
Snf8	chr11:96092440-96092628	188	46	0.2
Gpr179	chr11:97350766-97351003	237	258	1.1
Gm11560	chr11:99932024-99932067	43	37	0.9
Ttc7b	chr12:100337942-100337986	44	73	1.7
Ttc7b	chr12:100340497-100340547	50	307	6.1
Ccdc88c	chr12:100916171-100916562	391	1157	3
Serpina3n	chr12:104406843-104406854	11	59	5.4
D430019H16Rik	chr12:105475838-105476039	201	269	1.3
Papola	chr12:105810510-105811036	526	103	0.2
Setd3	chr12:108178429-108178470	41	26	0.6
Mirg	chr12:109744596-109744731	135	131	1
Mirg	chr12:109744596-109745809	1213	264	0.2
Mirg	chr12:109744940-109745809	869	133	0.2
Dync1h1	chr12:110644637-110645101	464	195	0.4
A230065H16Rik	chr12:111409855-111410014	159	254	1.6
Mark3	chr12:111646690-111646848	158	1157	7.3
Mark3	chr12:111646837-111646848	11	676	61.5
Esyt2	chr12:116319342-116319379	37	21	0.6
Lpin1	chr12:16558644-16558712	68	256	3.8
Gm6969	chr12:24638126-24638129	3	109	36.3
Gm6969	chr12:24638126-24638144	18	133	7.4
Kidins220	chr12:24994162-24994172	10	22	2.2
Tssc1	chr12:28793862-28793936	74	184	2.5
Myt1l	chr12:29533228-29533535	307	746	2.4
Cog5	chr12:31789254-31790244	990	201	0.2
Etv1	chr12:38861034-38861105	71	450	6.3
Efr3b	chr12:3982352-3982678	326	33	0.1
Nova1	chr12:46766290-46766331	41	52	1.3
Nova1	chr12:46817386-46817407	21	35	1.7
Fkbp1b	chr12:4841086-4841353	267	116	0.4
Prkd1	chr12:50355341-50355898	557	142	0.3
Scfd1	chr12:51409882-51410096	214	34	0.2
Scfd1	chr12:51409882-51410220	338	70	0.2
Scfd1	chr12:51410186-51410220	34	30	0.9
Strn3	chr12:51681403-51681583	180	20	0.1
Dtd2	chr12:52004297-52004370	73	240	3.3
Atp5s	chr12:69743229-69743318	89	67	0.8
Actr10	chr12:70972627-70972676	49	48	1
3110056K07Rik	chr12:71003510-71003888	378	311	0.8
3110056K07Rik	chr12:71006447-71006510	63	111	1.8
3110056K07Rik	chr12:71006447-71007565	1118	156	0.1
3110056K07Rik	chr12:71006452-71007565	1113	156	0.1
3110056K07Rik	chr12:71008175-71009162	987	110	0.1
Mnat1	chr12:73268586-73268718	132	21	0.2
Wdr89	chr12:75639189-75639196	7	85	12.1
Sptb	chr12:76579535-76579541	6	23	3.8
Gphn	chr12:78350869-78351174	305	1165	3.8
Gphn	chr12:78435174-78435212	38	502	13.2
Gphn	chr12:78560360-78560422	62	176	2.8
Zfyve1	chr12:83562355-83562454	99	129	1.3
Zfp410	chr12:84330945-84331092	147	528	3.6
Zfp410	chr12:84339051-84339253	202	453	2.2
Trappc13	chr13:104175224-104175255	31	166	5.4
Ryr2	chr13:11634307-11634328	21	114	5.4
Zfp131	chr13:119791211-119791627	416	332	0.8
Vdac3	chr13:18034487-18034492	5	831	166.2
Dcdc2a	chr13:25055426-25055442	16	21	1.3
Dcdc2a	chr13:25196035-25196130	95	84	0.9
Nrsn1	chr13:25268553-25268632	79	401	5.1
Sox4	chr13:28957889-28958024	135	40	0.3
Slc35b3	chr13:38951770-38951862	92	24	0.3
Hivep1	chr13:42103145-42103277	132	689	5.2
Sirt5	chr13:43365573-43365740	167	284	1.7
Sirt5	chr13:43385750-43386449	699	135	0.2
Jarid2	chr13:44869572-44870024	452	11298	25
Dtnbp1	chr13:44946865-44947188	323	3702	11.5
Dtnbp1	chr13:44946869-44947188	319	3702	11.6
Id4	chr13:48261017-48261327	310	503	1.6
Arl10	chr13:54581912-54582764	852	428	0.5
Tmed9	chr13:55571198-55571425	227	1016	4.5
Tmed9	chr13:55571198-55572031	833	1879	2.3
Tmed9	chr13:55571828-55572031	203	862	4.2
Fbxl21	chr13:56541132-56541794	662	73	0.1
Trpc7	chr13:56782763-56782804	41	269	6.6
Dapk1	chr13:60744587-60744605	18	55	3.1
Rsl1	chr13:67173154-67173176	22	195	8.9
Zfp429	chr13:67399774-67399816	42	177	4.2
Gm10037	chr13:67843550-67844035	485	238	0.5
Slc12a7	chr13:73810694-73810708	14	486	34.7
Gpr98	chr13:81155405-81155473	68	26	0.4
Atg10	chr13:91211590-91211680	90	335	3.7
Ap3b1	chr13:94543984-94544022	38	444	11.7
Hexb	chr13:97190545-97190661	116	124	1.1
Gm10320	chr13:98492888-98492894	6	23	3.8
Map1b	chr13:99445057-99445095	38	78	2.1
Chrm3	chr13:9975082-9975094	12	33	2.8
Mir6390	chr14:105621987-105623324	1337	439	0.3
Mir6390	chr14:105624436-105624550	114	862	7.6
Farp1	chr14:121252607-121253971	1364	148	0.1
Cadps	chr14:12472398-12472406	8	303	37.9
Lrrc3b	chr14:15437960-15438004	44	119	2.7
Gm6781	chr14:18532575-18532973	398	110	0.3
Saysd1	chr14:20082539-20082611	72	160	2.2
Camk2g	chr14:20741378-20741491	113	1829	16.2
Arf4	chr14:26657349-26658610	1261	161	0.1
Erc2	chr14:27628413-27628465	52	44	0.8
Erc2	chr14:27628415-27628465	50	44	0.9
Pbrm1	chr14:31019763-31019934	171	367	2.1
Nisch	chr14:31205095-31205353	258	416	1.6
Nisch	chr14:31205357-31205428	71	254	3.6
Ldb3	chr14:34549387-34549563	176	40	0.2
Gm6055	chr14:48079121-48079279	158	83	0.5
Gm6055	chr14:48079121-48079287	166	86	0.5
Gm26782	chr14:50872490-50872702	212	1324	6.2
Ndrg2	chr14:51913924-51913999	75	11013	146.8
Sall2	chr14:52329284-52329481	197	210	1.1
Trac	chr14:54193903-54194239	336	124	0.4
1700123O20Rik	chr14:54687473-54687506	33	37	1.1
Cryl1	chr14:57352636-57352740	104	23	0.2
Lats2	chr14:57692185-57692620	435	533	1.2
Rnaseh2b	chr14:62377884-62378105	221	42	0.2
Pinx1	chr14:63872447-63872663	216	181	0.8
Pinx1	chr14:63892723-63892834	111	280	2.5
Trim35	chr14:66307009-66307023	14	24	1.7
Pebp4	chr14:69854946-69855159	213	697	3.3
Rb1	chr14:73255561-73255602	41	25	0.6
Lrch1	chr14:74793127-74793231	104	257	2.5
Naa16	chr14:79364940-79365014	74	59	0.8
Pcdh17	chr14:84517949-84518028	79	262	3.3
Diap3	chr14:86748818-86749089	271	415	1.5
Mettl7a1	chr15:100303967-100304262	295	191	0.6
Scn8a	chr15:100880119-100880626	507	51	0.1
Scn8a	chr15:100886791-100886886	95	147	1.5
Scn8a	chr15:100892016-100892183	167	108	0.6
Nr4a1	chr15:101258382-101258426	44	110	2.5
Csad	chr15:102204139-102204280	141	167	1.2
Ctnnd2	chr15:30457747-30457985	238	221	0.9
Cmbl	chr15:31565286-31565501	215	1217	5.7
Cmbl	chr15:31588476-31588509	33	635	19.2
Fam173b	chr15:31623474-31624532	1058	671	0.6
Laptm4b	chr15:34269661-34269863	202	23	0.1
Stk3	chr15:35088388-35088401	13	45	3.5
Ncald	chr15:37792003-37792027	24	1677	69.9
Rims2	chr15:39306092-39306103	11	140	12.7
Rims2	chr15:39555065-39555097	32	155	4.8
Oxr1	chr15:41849429-41849506	77	75	1
Fam49b	chr15:63957585-63957667	82	411	5
Ptk2	chr15:73242986-73243017	31	157	5.1
Lgals2	chr15:78855687-78855772	85	21	0.2
Sh3bp1	chr15:78914601-78914676	75	105	1.4
Csnk1e	chr15:79442092-79442160	68	118	1.7
Tnrc6b	chr15:80890106-80890276	170	56	0.3
Ccdc134	chr15:82142779-82143589	810	107	0.1
Nipbl	chr15:8445184-8445270	86	52	0.6
Nipbl	chr15:8445402-8445796	394	92	0.2
Nipbl	chr15:8445402-8445863	461	92	0.2
Pim3	chr15:88863966-88864087	121	22	0.2
Mapk11	chr15:89149209-89149250	41	23	0.6
Syt10	chr15:89776979-89777635	656	471	0.7
Alg10b	chr15:90232019-90233471	1452	223	0.2
Lmbrd2	chr15:9200479-9202483	2004	220	0.1
Gm26760	chr15:92365498-92367073	1575	313	0.2
Gm26760	chr15:92366179-92367073	894	196	0.2
Hdac7	chr15:97798195-97798221	26	107	4.1
9330020H09Rik	chr15:98579724-98579917	193	34	0.2
Adcy6	chr15:98610048-98610076	28	32	1.1
Kmt2d	chr15:98836633-98836645	12	28	2.3
Rhebl1	chr15:98881448-98881484	36	92	2.6
Dexi	chr16:10536214-10536312	98	43	0.4
Gm23935	chr16:11143904-11144057	153	2061	13.5
Gm23935	chr16:11143904-11144058	154	2062	13.4
Zc3h7a	chr16:11173300-11173312	12	1108	92.3
Hic2	chr16:17222235-17222557	322	710	2.2
Hic2	chr16:17222241-17222557	316	706	2.2
Hic2	chr16:17222243-17222557	314	655	2.1
Hic2	chr16:17222263-17222510	247	485	2
Med15	chr16:17702930-17703200	270	44	0.2
2005-09-01	chr16:18626088-18626458	370	2670	7.2
Klhl24	chr16:20128611-20129221	610	173	0.3
Ap2m1	chr16:20533611-20534011	400	49	0.1
Psmd2	chr16:20660426-20660431	5	262	52.4
Fam131a	chr16:20694768-20694829	61	1666	27.3
Rps10	chr16:20822092-20822145	53	84	1.6
Rps10	chr16:20829278-20829284	6	80	13.3
Ccdc50	chr16:27423238-27423270	32	36	1.1
Lrch3	chr16:33010892-33012199	1307	363	0.3
Lrch3	chr16:33011820-33012199	379	245	0.6
Kalrn	chr16:33977337-33977345	8	88	11
Gm5963	chr16:35563836-35563845	9	64	7.1
Lrrc58	chr16:37879567-37879606	39	91	2.3
Lrrc58	chr16:37879567-37879612	45	91	2
Zbtb20	chr16:42952500-42952507	7	241	34.4
Gm6030	chr16:45205687-45205696	9	85	9.4
Myh15	chr16:49176489-49176665	176	228	1.3
Myh15	chr16:49176585-49176597	12	161	13.4
Cd47	chr16:49899856-49899900	44	840	19.1
Cd47	chr16:49908054-49908078	24	5686	236.9
Cd47	chr16:49908703-49908735	32	7006	218.9
Nxpe3	chr16:55895288-55895392	104	92	0.9
Nxpe3	chr16:55895288-55895406	118	92	0.8
Filip1l	chr16:57390722-57391694	972	2004	2.1
Filip1l	chr16:57391113-57391676	563	1988	3.5
Filip1l	chr16:57391186-57391669	483	1926	4
Filip1l	chr16:57391283-57391694	411	1731	4.2
Filip1l	chr16:57441875-57441887	12	323	26.9
Rbfox1	chr16:7193727-7193877	150	342	2.3
Grik1	chr16:87896689-87896774	85	95	1.1
1810013L24Rik	chr16:8831083-8831222	139	21	0.2
B230307C23Rik	chr16:98010119-98010617	498	473	0.9
4732491K20Rik	chr17:12336123-12336278	155	216	1.4
Tcte2	chr17:13576204-13576392	188	190	1
Gm3448	chr17:14973058-14973102	44	52	1.2
Chd1	chr17:15758814-15758828	14	26	1.9
Rgmb	chr17:15804493-15805035	542	99	0.2
Zfp948	chr17:21577297-21577456	159	105	0.7
3110052M02Rik	chr17:21660105-21660147	42	195	4.6
Flywch1	chr17:23764182-23764205	23	98	4.3
Flywch1	chr17:23766457-23767311	854	547	0.6
Flywch1	chr17:23766457-23767329	872	547	0.6
Flywch2	chr17:23782102-23782132	30	139	4.6
Srrm2	chr17:23801019-23801062	43	294	6.8
Decr2	chr17:26145017-26145047	30	625	20.8
Mapk14	chr17:28733568-28733995	427	669	1.6
Btbd9	chr17:30398162-30398169	7	22	3.1
Btbd9	chr17:30509504-30509526	22	203	9.2
Pisd	chr17:3082455-3082496	41	167	4.1
Gm17276	chr17:32130193-32130361	168	870	5.2
Gm17276	chr17:32132905-32133077	172	472	2.7
Gm26693	chr17:32812147-32812468	321	34	0.1
Zfp952	chr17:32996275-32996416	141	71	0.5
H2	chr17:35336333-35336588	255	174	0.7
H2	chr17:35336515-35336546	31	38	1.2
H2	chr17:35398156-35398533	377	121	0.3
Gm10499	chr17:35969843-35970005	162	955	5.9
Trim39	chr17:36314554-36314792	238	341	1.4
Xpo5	chr17:46243201-46243834	633	74	0.1
Usp49	chr17:47679048-47679104	56	75	1.3
Oard1	chr17:48410705-48410730	25	56	2.2
Plcl2	chr17:50675397-50675567	170	37	0.2
Kcnh8	chr17:52603892-52603980	88	54	0.6
Zfp959	chr17:55892847-55892860	13	139	10.7
Hdgfrp2	chr17:56081444-56081716	272	125	0.5
Catsperd	chr17:56642796-56642955	159	42	0.3
Slc25a23	chr17:57042124-57042139	15	39	2.6
Synj2	chr17:6033474-6033543	69	720	10.4
Ralbp1	chr17:65884222-65884463	241	163	0.7
Ptprm	chr17:66697653-66697699	46	132	2.9
Ptprm	chr17:66697654-66697700	46	132	2.9
Ptprm	chr17:66810369-66810380	11	452	41.1
Ptprm	chr17:67047829-67047982	153	212	1.4
Trmt61b	chr17:71589693-71589780	87	185	2.1
Trmt61b	chr17:71591858-71591946	88	661	7.5
Trmt61b	chr17:71591858-71591960	102	661	6.5
Trmt61b	chr17:71591926-71591946	20	508	25.4
Rmdn2	chr17:79684666-79684694	28	145	5.2
Cdkl4	chr17:80577557-80577612	55	76	1.4
Mta3	chr17:83823665-83823734	69	101	1.5
Lrpprc	chr17:84709457-84709543	86	145	1.7
Prepl	chr17:85062382-85062469	87	73	0.8
Prepl	chr17:85072186-85072232	46	24	0.5
Rpl31	chr17:85498513-85498518	5	202	40.4
Six3	chr17:85622551-85622718	167	113	0.7
Prkce	chr17:86635065-86635101	36	191	5.3
Ston1	chr17:88647534-88647862	328	43	0.1
Gm1976	chr17:94820615-94820741	126	411	3.3
Gm1976	chr17:94834322-94834332	10	163	16.3
Dtna	chr18:23415242-23415258	16	161	10.1
Zfp397	chr18:23954869-23954890	21	35	1.7
Fhod3	chr18:25124368-25124391	23	204	8.9
Lims2	chr18:31954993-31955082	89	38	0.4
A830052D11Rik	chr18:32355764-32355836	72	180	2.5
Nme5	chr18:34555944-34555962	18	44	2.4
Sil1	chr18:35309120-35309221	101	20	0.2
Sil1	chr18:35467846-35467945	99	291	2.9
Pfdn1	chr18:36403148-36403309	161	22	0.1
Ankhd1	chr18:36610798-36610986	188	40	0.2
Pcdhb10	chr18:37416396-37417069	673	69	0.1
Rnf14	chr18:38318132-38318141	9	40	4.4
Arhgap26	chr18:38834792-38834942	150	1194	8
Arhgap26	chr18:38837528-38838001	473	599	1.3
Ppp2r2b	chr18:42975763-42976073	310	1422	4.6
Ppp2r2b	chr18:42975763-42976176	413	1922	4.7
Ppp2r2b	chr18:42975763-42976263	500	1978	4
Ppp2r2b	chr18:42976134-42976176	42	279	6.6
Spinkl	chr18:44176665-44176752	87	119	1.4
Npy6r	chr18:44271765-44271862	97	371	3.8
Npy6r	chr18:44271765-44272110	345	423	1.2
Snx2	chr18:53216970-53216981	11	4076	370.5
Csnk1g3	chr18:53936925-53936948	23	99	4.3
Ndst1	chr18:60684495-60684665	170	231	1.4
Csnk1a1	chr18:61556370-61556427	57	151	2.6
Afap1l1	chr18:61737183-61737361	178	70	0.4
Htr4	chr18:62323993-62324088	95	58	0.6
Nedd4l	chr18:65076296-65076308	12	153	12.8
Ldlrad4	chr18:68005695-68005773	78	336	4.3
Ldlrad4	chr18:68100223-68101562	1339	136	0.1
Ldlrad4	chr18:68227176-68227368	192	305	1.6
Mro	chr18:73872083-73872215	132	30	0.2
Ctif	chr18:75525720-75526181	461	307	0.7
Ctif	chr18:75525720-75526182	462	307	0.7
Ctif	chr18:75528659-75529048	389	305	0.8
Neto1	chr18:86504959-86505585	626	82	0.1
Eif3s6	chr18:90310888-90311212	324	83	0.3
A330040F15Rik	chr19:12539840-12539948	108	158	1.5
Tle4	chr19:14595469-14595531	62	212	3.4
Pcsk5	chr19:17692848-17692907	59	28	0.5
Fam189a2	chr19:23976098-23976382	284	359	1.3
Fam189a2	chr19:23976098-23976975	877	593	0.7
Cbwd1	chr19:24919178-24919891	713	423	0.6
Cbwd1	chr19:24919198-24919891	693	423	0.6
Cdc37l1	chr19:29004587-29004596	9	598	66.4
9930021J03Rik	chr19:29791349-29791434	85	78	0.9
Fas	chr19:34300089-34300182	93	22	0.2
Ppp6r3	chr19:3459747-3459764	17	316	18.6
Exoc6	chr19:37683449-37684049	600	67	0.1
Plce1	chr19:38703040-38703587	547	152	0.3
Plce1	chr19:38703040-38703675	635	165	0.3
Zfyve27	chr19:42194873-42195286	413	99	0.2
Gm6776	chr19:43276691-43276701	10	35	3.5
Smndc1	chr19:53386373-53386556	183	76	0.4
Smndc1	chr19:53386373-53386558	185	76	0.4
Efemp2	chr19:5479802-5479818	16	106	6.6
Gpam	chr19:55099498-55099632	134	380	2.8
Gpam	chr19:55103183-55104306	1123	399	0.4
Vti1a	chr19:55317811-55318387	576	112	0.2
Malat1	chr19:5776322-5776358	36	24	0.7
Malat1	chr19:5780042-5780070	28	64	2.3
Atrnl1	chr19:57911257-57911512	255	62	0.2
Atrnl1	chr19:57911537-57912962	1425	358	0.3
Atrnl1	chr19:57911537-57912988	1451	388	0.3
Atrnl1	chr19:57913349-57913387	38	594	15.6
Atrnl1	chr19:57922456-57922674	218	880	4
Atrnl1	chr19:57922456-57922678	222	880	4
Atrnl1	chr19:57925325-57925469	144	269	1.9
Atrnl1	chr19:57927646-57927799	153	424	2.8
Atrnl1	chr19:57973421-57973520	99	63	0.6
Gfra1	chr19:58231357-58231629	272	48	0.2
4930506M07Rik	chr19:58977474-58977665	191	292	1.5
Dpf2	chr19:5914537-5914831	294	5109	17.4
Vax1	chr19:59164478-59166055	1577	186	0.1
5830428H23Rik	chr19:61120319-61120452	133	1144	8.6
Dnajc4	chr19:6992549-6992598	49	2436	49.7
Macrod1	chr19:7087469-7087669	200	37	0.2
Macrod1	chr19:7087469-7088302	833	312	0.4
Macrod1	chr19:7087469-7089554	2085	381	0.2
Macrod1	chr19:7165692-7165784	92	99	1.1
Stxbp3b	chr19:9548924-9548960	36	44	1.2
Ryr3	chr2:112714420-112714606	186	35	0.2
Fmn1	chr2:113426522-113426606	84	88	1
Gm13991	chr2:116525478-116525895	417	166	0.4
Casc4	chr2:121936224-121936343	119	25	0.2
Sord	chr2:122166196-122166290	94	158	1.7
Gm24409	chr2:122374837-122375371	534	120	0.2
Cep152	chr2:125595785-125595916	131	51	0.4
Idh3b	chr2:130291488-130292237	749	571	0.8
Macrod2	chr2:142166509-142166649	140	29	0.2
Macrod2	chr2:142218940-142218981	41	369	9
3300002I08Rik	chr2:150311432-150311558	126	176	1.4
Gm10130	chr2:150325170-150326155	985	255	0.3
Srxn1	chr2:152105011-152105191	180	108	0.6
2500004C02Rik	chr2:153345118-153345170	52	224	4.3
Ift52	chr2:163048127-163050242	2115	280	0.1
Ift52	chr2:163050125-163050242	117	200	1.7
Tox2	chr2:163204438-163204516	78	302	3.9
Tox2	chr2:163204438-163204517	79	302	3.8
Pabpc1l	chr2:164047615-164047696	81	390	4.8
Pabpc1l	chr2:164047615-164047697	82	390	4.8
Slc35c2	chr2:165279549-165279649	100	23	0.2
Atp9a	chr2:168684757-168684872	115	25	0.2
Gm14275	chr2:172292338-172292484	146	115	0.8
Gnas	chr2:174304199-174304992	793	98	0.1
Skida1	chr2:18049610-18050193	583	71	0.1
Mllt10	chr2:18050368-18050428	60	20	0.3
Ythdf1	chr2:180907788-180907986	198	20	0.1
Acbd5	chr2:23080668-23080689	21	781	37.2
Olfm1	chr2:28212380-28212400	20	166	8.3
Odf2	chr2:29908722-29910189	1467	632	0.4
RP23	chr2:32853708-32853895	187	31	0.2
Acbd7	chr2:3332801-3333096	295	523	1.8
Mapkap1	chr2:34419146-34419265	119	201	1.7
Fbxw2	chr2:34820493-34821011	518	576	1.1
Cntrl	chr2:35124194-35124227	33	219	6.6
Lhx2	chr2:38356691-38356732	41	22	0.5
Gm13481	chr2:48424656-48424894	238	97	0.4
Camk1d	chr2:5379040-5379376	336	198	0.6
Camk1d	chr2:5379097-5379387	290	193	0.7
Camk1d	chr2:5379130-5379376	246	181	0.7
Camk1d	chr2:5379175-5379387	212	162	0.8
Ccdc148	chr2:59017516-59017531	15	160	10.7
Gm13594	chr2:65237323-65238082	759	346	0.5
Klhl23	chr2:69822957-69822989	32	443	13.8
Metap1d	chr2:71522209-71522221	12	44	3.7
Atf2	chr2:73867876-73868051	175	56	0.3
Atf2	chr2:73867878-73868031	153	56	0.4
Atf2	chr2:73867878-73868261	383	89	0.2
Osbpl6	chr2:76450267-76450562	295	171	0.6
Osbpl6	chr2:76457158-76457811	653	171	0.3
Slc39a13	chr2:91070430-91070507	77	194	2.5
Slc39a13	chr2:91070430-91071545	1115	432	0.4
Slc39a13	chr2:91071067-91071545	478	236	0.5
Gm13791	chr2:92855464-92855575	111	215	1.9
Cd82	chr2:93425674-93425859	185	113	0.6
Ext2	chr2:93739946-93739965	19	109	5.7
Ttc17	chr2:94296116-94296207	91	46	0.5
Ttc17	chr2:94384348-94384408	60	61	1
Gm10800	chr2:98662846-98662875	29	3612	124.6
Chia1	chr3:106001682-106001833	151	65	0.4
AI504432	chr3:107046828-107046855	27	145	5.4
Gm12494	chr3:107953366-107953436	70	309	4.4
Taf13	chr3:108571634-108571657	23	22	1
Slc25a24	chr3:109120535-109121147	612	461	0.8
Slc25a24	chr3:109120535-109123088	2553	853	0.3
Slc25a24	chr3:109122946-109123088	142	392	2.8
Arsj	chr3:126418698-126418800	102	285	2.8
Tifa	chr3:127791062-127791092	30	51	1.7
Pla2g12a	chr3:129844840-129844863	23	47	2
Nexn	chr3:152265713-152265778	65	146	2.2
Usp33	chr3:152388099-152388965	866	622	0.7
4930570G19Rik	chr3:156555347-156555425	78	331	4.2
Ankrd13c	chr3:158007475-158007990	515	1501	2.9
Ankrd13c	chr3:158007657-158008434	777	732	0.9
Gm7536	chr3:24331819-24331829	10	239	23.9
Nlgn1	chr3:26153489-26153996	507	59	0.1
Egfem1	chr3:29685178-29685341	163	208	1.3
Gnb4	chr3:32616079-32616188	109	49	0.4
Mir1897	chr3:34656378-34656843	465	110	0.2
Mir1897	chr3:34656437-34656843	406	110	0.3
Atp11b	chr3:35841030-35841115	85	501	5.9
Atp11b	chr3:35843571-35843696	125	762	6.1
Dcun1d1	chr3:35906131-35906295	164	46	0.3
Dcun1d1	chr3:35909144-35909279	135	35	0.3
Dcun1d1	chr3:35909192-35909457	265	35	0.1
Spata5	chr3:37481492-37481593	101	22	0.2
Pcdh10	chr3:45385332-45385380	48	207	4.3
Pcdh10	chr3:45385334-45385381	47	207	4.4
Rps23	chr3:62928011-62928019	8	28	3.5
Trim2	chr3:84171630-84171717	87	22	0.3
Gatb	chr3:85589884-85590107	223	171	0.8
Gm3788	chr3:86671729-86671858	129	121	0.9
5830417I10Rik	chr3:88797184-88799338	2154	325	0.2
Gon4l	chr3:88904831-88904999	168	57	0.3
Gm15264	chr3:94745660-94746551	891	135	0.2
Psmd4	chr3:95030509-95032311	1802	442	0.2
Rps10	chr3:95622244-95622273	29	38	1.3
Polr3gl	chr3:96600311-96600459	148	80	0.5
Polr3gl	chr3:96600881-96600912	31	89	2.9
Lrp8os3	chr4:107797186-107797317	131	92	0.7
Zfyve9	chr4:108686062-108686234	172	75	0.4
Agbl4	chr4:110479405-110479423	18	240	13.3
Ipp	chr4:116539121-116540826	1705	277	0.2
Tmem69	chr4:116556911-116557053	142	96	0.7
Gm12996	chr4:116836521-116836902	381	179	0.5
Rnf220	chr4:117289975-117290005	30	25	0.8
AA415398	chr4:119523633-119523802	169	34	0.2
Gm12892	chr4:122008142-122008181	39	98	2.5
Meaf6	chr4:125106256-125106337	81	25	0.3
Rnf19b	chr4:129070180-129070479	299	59	0.2
Gm12976	chr4:129239285-129239524	239	333	1.4
Atpif1	chr4:132514459-132515102	643	160	0.2
Pafah2	chr4:134400278-134400373	95	29	0.3
Tmem57	chr4:134841899-134842652	753	95	0.1
Gm12989	chr4:135716664-135716670	6	109	18.2
Ece1	chr4:137949095-137949158	63	361	5.7
Igsf21	chr4:140087718-140087846	128	40	0.3
Igsf21	chr4:140098150-140098179	29	207	7.1
Igsf21	chr4:140098150-140098187	37	207	5.6
Tmem51	chr4:142041058-142041139	81	672	8.3
Tmem51	chr4:142043008-142043088	80	593	7.4
Gm11836	chr4:14434415-14434567	152	32	0.2
Morn1	chr4:155095954-155096501	547	99	0.2
Ttpa	chr4:20019570-20019949	379	193	0.5
Ankrd6	chr4:32940580-32940946	366	65	0.2
Lingo2	chr4:36279207-36279316	109	99	0.9
Aptx	chr4:40689429-40689500	71	70	1
Aptx	chr4:40691487-40692140	653	72	0.1
Zkscan16	chr4:58961037-58962660	1623	323	0.2
Zkscan16	chr4:58962118-58962660	542	121	0.2
Susd1	chr4:59269251-59269590	339	91	0.3
Aldoart1	chr4:72852745-72852791	46	25	0.5
Slc24a2	chr4:87229977-87230228	251	251	1
Gm12696	chr4:97523053-97523060	7	192	27.4
Gm12696	chr4:97523055-97523081	26	194	7.5
Tmem150c	chr5:100108643-100108821	178	25	0.1
Ephx4	chr5:107396929-107397031	102	205	2
Evi5	chr5:107753882-107753894	12	128	10.7
4930522L14Rik	chr5:109697175-109698084	909	463	0.5
Gm15446	chr5:109882016-109882118	102	23	0.2
Zfp932	chr5:109947339-109948144	805	238	0.3
Zfp932	chr5:110005964-110006035	71	88	1.2
Asphd2	chr5:112394718-112394776	58	74	1.3
Sez6l	chr5:112437693-112437712	19	34	1.8
Gm20499	chr5:114814087-114814247	160	412	2.6
Gm20499	chr5:114814087-114816353	2266	845	0.4
Gm13832	chr5:115406008-115406055	47	31	0.7
Sirt4	chr5:115489755-115490125	370	706	1.9
Fbxo21	chr5:117977370-117977470	100	52	0.5
Dhx37	chr5:125412453-125412525	72	53	0.7
Tmem132b	chr5:125784831-125784875	44	23	0.5
4933404O12Rik	chr5:136933462-136933665	203	354	1.7
Gpc2	chr5:138268698-138269079	381	53	0.1
Prkar1b	chr5:139027685-139027782	97	522	5.4
Mmd2	chr5:142574704-142574763	59	476	8.1
Actb	chr5:142906887-142906906	19	52	2.7
Tmem130	chr5:144724162-144724573	411	68	0.2
Trrap	chr5:144854054-144854125	71	320	4.5
Cdk8	chr5:146260979-146261152	173	153	0.9
Cdk8	chr5:146260979-146261153	174	153	0.9
Cdk8	chr5:146261003-146261084	81	73	0.9
Cdk8	chr5:146261016-146261396	380	193	0.5
Wasf3	chr5:146472977-146473615	638	288	0.5
Wasf3	chr5:146473155-146473615	460	183	0.4
Wasf3	chr5:146473192-146473615	423	147	0.3
Wasf3	chr5:146473193-146473615	422	147	0.3
Gm8494	chr5:146574841-146575122	281	74	0.3
Hmgb1	chr5:149126541-149126615	74	26	0.4
Gnai1	chr5:18359628-18359666	38	43	1.1
Gsap	chr5:21236783-21236920	137	53	0.4
6030443J06Rik	chr5:22614762-22614976	214	39	0.2
5031425E22Rik	chr5:23386593-23386659	66	40	0.6
Agap3	chr5:24480123-24480348	225	266	1.2
Agap3	chr5:24480154-24480348	194	233	1.2
Rnf32	chr5:29195634-29195908	274	283	1
Cgref1	chr5:30931864-30932145	281	162	0.6
Rbks	chr5:31670869-31670929	60	80	1.3
Add1	chr5:34581236-34581431	195	1801	9.2
Gm7854	chr5:43149072-43149171	99	132	1.3
9230114K14Rik	chr5:52207381-52207394	13	27	2.1
Ube2k	chr5:65569507-65569523	16	139	8.7
Ube2k	chr5:65585929-65587067	1138	1608	1.4
Pds5a	chr5:65607556-65610256	2700	726	0.3
Pds5a	chr5:65610082-65610195	113	540	4.8
Apbb2	chr5:66313483-66313489	6	2922	487
Gabra4	chr5:71658340-71658363	23	234	10.2
Fryl	chr5:73024771-73024788	17	414	24.4
Fryl	chr5:73024771-73024790	19	414	21.8
Fryl	chr5:73024771-73024794	23	414	18
Fryl	chr5:73050867-73050875	8	97	12.1
Clock	chr5:76231898-76231959	61	46	0.8
C530008M17Rik	chr5:76867366-76867380	14	20	1.4
Rundc3b	chr5:8566754-8567229	475	259	0.5
Rundc3b	chr5:8566754-8567353	599	259	0.4
Abcb1a	chr5:8605296-8605340	44	443	10.1
Cenpc1	chr5:86065621-86065644	23	66	2.9
Eif5al3	chr5:90132896-90132963	67	42	0.6
G3bp2	chr5:92137552-92137752	200	1068	5.3
Scarb2	chr5:92441313-92441661	348	77	0.2
Scarb2	chr5:92441313-92443630	2317	331	0.1
Scarb2	chr5:92442523-92442826	303	128	0.4
Scarb2	chr5:92444912-92444921	9	85	9.4
Fras1	chr5:96490123-96490678	555	155	0.3
Sumf1	chr6:108145967-108145980	13	66	5.1
Gm15519	chr6:112565808-112566326	518	72	0.1
Cpne9	chr6:113284310-113284312	2	150	75
Cpne9	chr6:113284311-113284313	2	150	75
Tmcc1	chr6:116029220-116029972	752	164	0.2
Tmcc1	chr6:116029220-116031403	2183	328	0.2
Tmcc1	chr6:116030506-116031403	897	161	0.2
Cacna1c	chr6:118596743-118596810	67	106	1.6
Adipor2	chr6:119388876-119389548	672	135	0.2
Erc1	chr6:119693818-119694364	546	119	0.2
Phf14	chr6:12039211-12039797	586	114	0.2
Phf14	chr6:12044024-12044917	893	172	0.2
Usp18	chr6:121272555-121272917	362	651	1.8
Klrg1	chr6:122297958-122297986	28	53	1.9
Rimklb	chr6:122486359-122486382	23	304	13.2
Gm26826	chr6:122816698-122816708	10	90	9
Ptms	chr6:124917206-124917307	101	35	0.3
Dusp16	chr6:134796500-134796711	211	39	0.2
Plekha5	chr6:140491013-140491180	167	161	1
Plekha5	chr6:140555790-140555936	146	64	0.4
Rpl38	chr6:140750240-140750250	10	218	21.8
Cmas	chr6:142757084-142757301	217	26	0.1
C2cd5	chr6:143019328-143019429	101	412	4.1
Lmntd1	chr6:145453708-145453918	210	214	1
Lmntd1	chr6:145456156-145457467	1311	530	0.4
Lmntd1	chr6:145456632-145457467	835	496	0.6
Lmntd1	chr6:145486018-145486396	378	385	1
Ccdc91	chr6:147498726-147498757	31	103	3.3
Mettl20	chr6:149148381-149148419	38	56	1.5
Gm4876	chr6:17116249-17116368	119	540	4.5
Gm5874	chr6:18825207-18825316	109	25	0.2
Arf5	chr6:28421776-28421834	58	112	1.9
Arf5	chr6:28421776-28421835	59	112	1.9
Ahcyl2	chr6:29788301-29788482	181	100	0.6
Copg2	chr6:30802828-30804453	1625	348	0.2
Cald1	chr6:34652590-34652670	80	42	0.5
Cnot4	chr6:35091880-35091888	8	47	5.9
Cnot4	chr6:35107781-35107815	34	39	1.1
Ptn	chr6:36784899-36785012	113	180	1.6
Calcr	chr6:3763804-3764056	252	110	0.4
Ubn2	chr6:38454404-38454456	52	730	14
Hipk2	chr6:38687513-38689060	1547	381	0.2
Hipk2	chr6:38687513-38690125	2612	506	0.2
Mkrn1	chr6:39412245-39412367	122	135	1.1
Mkrn1	chr6:39412245-39413396	1151	250	0.2
Mkrn1	chr6:39413336-39413396	60	102	1.7
Zfp467	chr6:48444623-48444654	31	162	5.2
Rarres2	chr6:48572740-48572828	88	1268	14.4
Ppm1k	chr6:57511789-57511796	7	203	29
Dlx6os1	chr6:6862945-6863038	93	46	0.5
Tex261	chr6:83732032-83732418	386	113	0.3
Nat8	chr6:85835680-85836982	1302	561	0.4
Nat8	chr6:85836557-85836982	425	560	1.3
Cml1	chr6:85911834-85911980	146	1501	10.3
Cml1	chr6:85913396-85913480	84	2356	28
Cml1	chr6:85914472-85914528	56	2900	51.8
Cml1	chr6:85914472-85914533	61	2900	47.5
Pcyox1	chr6:86392933-86392965	32	258	8.1
Magi1	chr6:93717423-93717445	22	22	1
Fam19a4	chr6:97044634-97044766	132	31	0.2
Relt	chr7:100855115-100855124	9	66	7.3
Numa1	chr7:101970138-101970354	216	177	0.8
Stim1	chr7:102433197-102433233	36	334	9.3
Stim1	chr7:102433198-102433233	35	334	9.5
Trim66	chr7:109494015-109494084	69	76	1.1
Ipo7	chr7:110055954-110056840	886	270	0.3
Copb1	chr7:114248754-114248770	16	75	4.7
Gm15500	chr7:114713041-114713050	9	80	8.9
Gm15500	chr7:114728620-114728631	11	2494	226.7
Gm5601	chr7:119741935-119742226	291	1037	3.6
Prkcb	chr7:122442704-122442751	47	39	0.8
Prkcb	chr7:122443107-122443413	306	45	0.1
3100003L05Rik	chr7:124702558-124702667	109	73	0.7
Gm9967	chr7:126774379-126774459	80	429	5.4
Mylpf	chr7:127208847-127208951	104	139	1.3
Mylpf	chr7:127209284-127209398	114	336	2.9
Zscan18	chr7:12780572-12780681	109	838	7.7
Zfp446	chr7:12957152-12957184	32	47	1.5
Nsmce4a	chr7:130546835-130546872	37	212	5.7
Tacc2	chr7:130755897-130755905	8	338	42.2
Plekha1	chr7:130866031-130866043	12	88	7.3
Cfap46	chr7:139638238-139638428	190	204	1.1
Ifitm6	chr7:141058416-141059004	588	62	0.1
Ifitm6	chr7:141060798-141060866	68	28	0.4
Ptdss2	chr7:141140721-141140936	215	160	0.7
Gm7290	chr7:142763142-142763162	20	67	3.4
Inafm1	chr7:16273711-16273921	210	39	0.2
Prkd2	chr7:16861731-16861829	98	39	0.4
Pnmal1	chr7:16962969-16964607	1638	981	0.6
Psg16	chr7:17083567-17083760	193	341	1.8
Psg16	chr7:17084876-17084893	17	273	16.1
Apoc1	chr7:19693235-19693394	159	153	1
Hnrnpul1	chr7:25756162-25756198	36	60	1.7
Eid2b	chr7:28280605-28283205	2600	2018	0.8
Eid2b	chr7:28280942-28281687	745	825	1.1
Eid2b	chr7:28280942-28281700	758	826	1.1
Eid2b	chr7:28280942-28283181	2239	2016	0.9
Eid2b	chr7:28282035-28283181	1146	1170	1
Eid2b	chr7:28282042-28283181	1139	1170	1
Zfp940	chr7:29837559-29838689	1130	164	0.1
Zfp420	chr7:29860094-29860341	247	68	0.3
ZNF383	chr7:29908713-29908813	100	46	0.5
Zfp382	chr7:30140052-30140764	712	127	0.2
Zfp382	chr7:30140076-30140764	688	118	0.2
Zfp146	chr7:30160487-30160752	265	52	0.2
Zfp146	chr7:30160487-30160858	371	113	0.3
Cox7a1	chr7:30181799-30182319	520	53	0.1
Scn1b	chr7:31126279-31126298	19	44	2.3
Pop4	chr7:38268605-38268655	50	121	2.4
2610021A01Rik	chr7:41603436-41603534	98	380	3.9
Klk1b24	chr7:44190664-44190908	244	935	3.8
Clec11a	chr7:44307835-44307897	62	262	4.2
1700008O03Rik	chr7:44360740-44360857	117	31	0.3
Lrrc4b	chr7:44442013-44442122	109	111	1
Syt5	chr7:4547313-4547668	355	7694	21.7
Plekha4	chr7:45535615-45535941	326	1286	3.9
Plekha4	chr7:45538652-45538700	48	299	6.2
Sult2b1	chr7:45731827-45731934	107	72	0.7
Lmtk3	chr7:45787075-45787152	77	41	0.5
Spty2d1	chr7:47008547-47008591	44	1496	34
Spty2d1	chr7:47008547-47008593	46	1496	32.5
Spty2d1	chr7:47008547-47009439	892	3291	3.7
Spty2d1	chr7:47008555-47008594	39	1496	38.4
Spty2d1	chr7:47008555-47009439	884	3291	3.7
Spty2d1	chr7:47008724-47009439	715	1785	2.5
Spty2d1	chr7:47008725-47009012	287	1783	6.2
Nat14	chr7:4922879-4922909	30	585	19.5
Zfp524	chr7:5015148-5015173	25	33	1.3
Zfp524	chr7:5015153-5015236	83	38	0.5
Tubgcp5	chr7:55829004-55829096	92	27	0.3
Gabra5	chr7:57508498-57508557	59	434	7.4
D7Ertd715e	chr7:59314730-59315316	586	144	0.2
Snrpn	chr7:60039000-60039073	73	125	1.7
Snrpn	chr7:60047889-60047996	107	2236	20.9
A230006K03Rik	chr7:61276439-61276540	101	41	0.4
A230006K03Rik	chr7:61279686-61279759	73	53	0.7
Zfp444	chr7:6193214-6193852	638	719	1.1
Zfp444	chr7:6193244-6193852	608	643	1.1
A330076H08Rik	chr7:61983962-61985213	1251	158	0.1
Otud7a	chr7:63545617-63545843	226	69	0.3
Otud7a	chr7:63545689-63545843	154	45	0.3
Abhd2	chr7:79340011-79340018	7	35	5
3110040N11Rik	chr7:81780278-81780570	292	2376	8.1
Rab30	chr7:92777490-92777690	200	51	0.3
Rab30	chr7:92822226-92822291	65	33	0.5
Dgat2	chr7:99167515-99167528	13	38	2.9
Gdpd5	chr7:99456997-99457011	14	157	11.2
Rps3	chr7:99472513-99472522	9	220	24.4
Spcs2	chr7:99856413-99856498	85	611	7.2
Cdh11	chr8:102739144-102739299	155	317	2
Cmtm3	chr8:104340504-104340511	7	44	6.3
Cbfb	chr8:105175887-105175905	18	20	1.1
Slc7a6	chr8:106171197-106171913	716	110	0.2
Wwp2	chr8:107444942-107444951	9	201	22.3
Adat1	chr8:111991788-111992005	217	308	1.4
Wwox	chr8:115287722-115287775	53	25	0.5
Cmc2	chr8:116918760-116918996	236	474	2
Cmip	chr8:117403842-117404067	225	335	1.5
Exoc8	chr8:124900029-124900097	68	388	5.7
Exoc8	chr8:124900030-124900059	29	383	13.2
Grtp1	chr8:13188081-13188135	54	33	0.6
4932443I19Rik	chr8:13710405-13710539	134	2212	16.5
Gm26909	chr8:22506592-22506655	63	47	0.7
Vdac3	chr8:22583813-22583815	2	1148	574
Lsm1	chr8:25785307-25785584	277	65	0.2
Hgsnat	chr8:25948391-25948739	348	41	0.1
Erlin2	chr8:27031323-27031388	65	72	1.1
Gm3985	chr8:32883532-32883715	183	204	1.1
Gm3985	chr8:32896413-32896649	236	222	0.9
Gm3985	chr8:32898364-32898417	53	46	0.9
Gm3985	chr8:32950171-32950348	177	548	3.1
Purg	chr8:33397877-33398781	904	184	0.2
Ppp2cb	chr8:33600178-33600218	40	29	0.7
Dusp4	chr8:34820126-34820812	686	225	0.3
Dusp4	chr8:34820126-34821959	1833	550	0.3
Fcor	chr8:3672805-3672833	28	374	13.4
Pdgfrl	chr8:40962201-40962395	194	194	1
Irf2	chr8:46740139-46740231	92	98	1.1
Wwc2	chr8:47885226-47885470	244	46	0.2
Galntl6	chr8:57799504-57800185	681	346	0.5
Galntl6	chr8:57802465-57802845	380	343	0.9
Galntl6	chr8:58911955-58912131	176	195	1.1
Npy1r	chr8:66697093-66697209	116	106	0.9
Nat1	chr8:67480872-67481015	143	186	1.3
Ints10	chr8:68831489-68831651	162	76	0.5
Tmem59l	chr8:70481225-70482445	1220	524	0.4
Tmem59l	chr8:70481225-70482562	1337	682	0.5
Tmem59l	chr8:70481225-70482826	1601	850	0.5
Tmem59l	chr8:70482549-70482562	13	157	12.1
Slc27a1	chr8:71598796-71598820	24	82	3.4
Slc27a1	chr8:71601249-71601278	29	56	1.9
Gm7984	chr8:75399355-75399489	134	181	1.4
Mmaa	chr8:79294867-79294905	38	68	1.8
Gab1	chr8:80880749-80881311	562	77	0.1
Mast1	chr8:84913971-84914050	79	43	0.5
Mylk3	chr8:85354433-85354533	100	267	2.7
Zfp423	chr8:87767916-87768134	218	87	0.4
Cyld	chr8:88697281-88697525	244	193	0.8
Tox3	chr8:90345805-90345914	109	21	0.2
Tox3	chr8:90346725-90347119	394	124	0.3
Chd9	chr8:90908613-90908635	22	315	14.3
Nudt21	chr8:94015497-94016007	510	133	0.3
Nudt21	chr8:94015497-94016488	991	385	0.4
Nudt21	chr8:94015497-94017654	2157	848	0.4
Nup93	chr8:94266850-94267223	373	102	0.3
Cpne2	chr8:94544118-94544297	179	40	0.2
Dag1	chr9:108255228-108256050	822	168	0.2
Ip6k2	chr9:108784286-108784332	46	139	3
Nme6	chr9:109832807-109832888	81	314	3.9
Map4	chr9:109965091-109965103	12	25	2.1
Dhx30	chr9:110107941-110107969	28	340	12.1
Dhx30	chr9:110110004-110110596	592	2868	4.8
Setd2	chr9:110577122-110577289	167	31	0.2
Setd2	chr9:110577122-110577338	216	48	0.2
Setd2	chr9:110609998-110610049	51	27	0.5
Rps27rt	chr9:115000640-115000651	11	181	16.5
Rps27rt	chr9:115000644-115000651	7	181	25.9
Osbpl10	chr9:115084776-115084986	210	708	3.4
Osbpl10	chr9:115084776-115086496	1720	1655	1
Golga4	chr9:118576273-118576356	83	58	0.7
Itga9	chr9:118674957-118675168	211	68	0.3
Trak1	chr9:121403431-121403804	373	425	1.1
Lars2	chr9:123453914-123453932	18	26	1.4
Lars2	chr9:123455255-123455262	7	24	3.4
2010315B03Rik	chr9:124282075-124282406	331	1896	5.7
Amotl1	chr9:14591937-14591961	24	27	1.1
Zfp846	chr9:20591543-20591559	16	25	1.6
Cdkn2d	chr9:21291222-21291257	35	407	11.6
Slc44a2	chr9:21353001-21353172	171	620	3.6
Dock6	chr9:21803922-21803961	39	40	1
Zfp599	chr9:22258810-22258993	183	21	0.1
Gm29642	chr9:25180350-25180386	36	53	1.5
Gm29642	chr9:25244391-25244593	202	353	1.7
4931429I11Rik	chr9:40964481-40964540	59	90	1.5
2610203C20Rik	chr9:41376972-41377355	383	41	0.1
Tbcel	chr9:42416304-42416321	17	54	3.2
Tmem136	chr9:43117485-43117505	20	23	1.1
Slc37a4	chr9:44401707-44401769	62	1551	25
Ddx6	chr9:44604664-44604745	81	186	2.3
Bace1	chr9:45852180-45852578	398	42	0.1
Nnmt	chr9:48596631-48596712	81	2714	33.5
Dixdc1	chr9:50704887-50705416	529	270	0.5
Rdx	chr9:52100371-52100463	92	1467	15.9
Rdx	chr9:52102837-52103418	581	755	1.3
Zc3h12c	chr9:52168804-52168898	94	41	0.4
Gm24270	chr9:56223823-56224002	179	1722	9.6
Peak1	chr9:56246381-56246385	4	415	103.8
Hcn4	chr9:58862016-58863160	1144	180	0.2
Uaca	chr9:60866082-60866352	270	66	0.2
Ptplad1	chr9:64996877-64996885	8	387	48.4
Dpp8	chr9:65082736-65084503	1767	318	0.2
Plekho2	chr9:65561882-65562036	154	361	2.3
Plekho2	chr9:65569819-65570063	244	281	1.2
Plekho2	chr9:65571414-65571568	154	23	0.1
Tln2	chr9:67264119-67264961	842	300	0.4
Vps13c	chr9:67854157-67854187	30	66	2.2
Rora	chr9:69289350-69289374	24	53	2.2
Mns1	chr9:72452884-72452912	28	148	5.3
Tmod3	chr9:75520886-75521378	492	1677	3.4
Birc2	chr9:7824516-7824625	109	55	0.5
Eef1a1	chr9:78476140-78476312	172	24	0.1
Lca5	chr9:83405810-83405851	41	109	2.7
9330154J02Rik	chr9:85841230-85841266	36	26	0.7
Snap91	chr9:86809614-86809619	5	192	38.4
RP23	chr9:91317231-91317413	182	177	1
RP23	chr9:91338086-91338728	642	79	0.1
Plscr2	chr9:92280928-92280932	4	436	109
U2surp	chr9:95497255-95497293	38	358	9.4
Atp1b3	chr9:96335845-96335854	9	162	18
Copb2	chr9:98581303-98581322	19	284	14.9
Jpx	chrX:103518311-103518357	46	31	0.7
Abcb7	chrX:104345260-104345724	464	158	0.3
Tex16	chrX:112171508-112172022	514	170	0.3
Tmsb15b2	chrX:136957477-136957640	163	983	6
Amot	chrX:145483692-145483726	34	52	1.5
Cnksr2	chrX:157815291-157817616	2325	320	0.1
Cnksr2	chrX:158041089-158041100	11	23	2.1
A830080D01Rik	chrX:159591332-159591357	25	349	14
Gpm6b	chrX:166344539-166344545	6	104	17.3
Msl3	chrX:168656682-168656735	53	21	0.4
Gm7598	chrX:38475521-38475691	170	24	0.1
Ocrl	chrX:47957397-47957410	13	408	31.4
Enox2	chrX:49273426-49273769	343	197	0.6
AW822252	chrX:53691373-53691464	91	25	0.3
Slitrk2	chrX:66653467-66653641	174	167	1
Gabra3	chrX:72644438-72644523	85	102	1.2
Pnma3	chrX:73064200-73064432	232	446	1.9
Atp2b3	chrX:73572165-73573271	1106	123	0.1
Tbl1x	chrX:77509476-77509618	142	31	0.2
Gm8806	chrX:80532874-80533273	399	314	0.8
Gm8806	chrX:80532874-80533315	441	346	0.8
Gm6787	chrX:8096646-8096757	111	23	0.2
Gm6977	chrX:90744407-90744475	68	119	1.8
Gm6977	chrX:90744407-90744521	114	128	1.1
Gpr165	chrX:96720994-96721906	912	167	0.2
Gpr165	chrX:96721347-96721906	559	87	0.2
